# Supplementary material for: Converting quadratic entropy to diversity: Both animals and alleles are diverse, but some are more diverse than others
Source: PLoS One. 2017 Oct 31;12(10):e0185499. doi: 10.1371/journal.pone.0185499 (PMC5663342; doi:10.1371/journal.pone.0185499)
Supplement: S6 Appendix — (XLSX) [file pone.0185499.s006.xlsx]

## Sheet: DR Aver Q & Diver
				S6 Appendix: Analysis of Rao Diversity (QDiver) for DR Matrix
						Antechinus Outcomes Sheet
						Diploid
			No. Alleles/Locus			600
			No. Individuals			300
			No. Populations			6
			No. Regions (Species)			2
						Total Study
			2N			600
			Q (Tot)			0.12445
			Q* (Tot)			0.99833
			Gamma (Tot)			1.14213
			Gamma* (Tot)			600
			Gamma~(Tot)			0.12465
						Among Regions
			N (AR)			2
				Q (AR)		0.0747924
			Q* (AR)			0.5
			Delta (AR)			1.08084
			Delta* (AR)			2
			Delta' (AR)	Delta~(AR)		0.149585
			Divergence Test			P < 0.001
						Within Regions
				NSW		Study Aver		VIC
		2N (WR)		300		300		300
		Q (WR)		0.0362478		0.0536666		0.0710854
		Q* (WR)		0.996667		0.996667		0.996667
		Sigma (WR)		1.03761		1.05671		1.07653
		Sigma~(WR)		300		300		300
		Sigma' (WR)		0.036369		0.0538461		0.0713232
			Homo (WR) Diversity Test			P < 0.001
						Among Populations Within Region
				NSW		Study Aver		VIC
	N (AP)			3		3		3
	Q (AP)			0.000337303		0.000432779		0.000531816
	Q* (AP)			0.666667		0.666667		0.666667
	Beta (AP)			1.00034		1.00043		1.00053
	Beta* (AP)			3		3		3
		Beta~(AP)		0.000505955		0.000649168		0.000797724
		Divergence Test		P > 0.90		P < 0.001		P > 0.74
						Within Populations
		Antechinus stuartii							Antechinus agilis
	GRP1	GRP2	GRP3	NSW Aver		Study Aver		VIC Aver	BLR4	CAM5	MUR6
2N (WP)	100	100	100	100		100		100	100	100	100
Q (WP)	0.0308644	0.0360745	0.0408288	0.0359226		0.0532569		0.0705912	0.0717806	0.0687872	0.0712056
Q* (WP)	0.99	0.99	0.99	0.99		0.99		0.99	0.99	0.99	0.99
Alpha (WP)	1.03185	1.03742	1.04257	1.03726		1.05625		1.07595	1.07733	1.07387	1.07666
Alpha*(WP)	100	100	100	100		100		100	100	100	100
Alpha~(WP)	0.0311762	0.0364388	0.0412412	0.0362854		0.0537948		0.0713042	0.0725057	0.069482	0.0719249
	NSW Homogeneous (WP) Test ®			P < 0.07		P < 0.001		P > 0.87	¬ VIC Homogeneous (WP) Test
						Cross-Region Homo Test
				Among Individs / Within Populations
		Antechinus stuartii							Antechinus agilis
	GRP1	GRP2	GRP3	NSW Aver		Study Aver		VIC Aver	BLR4	CAM5	MUR6
N (AI)	50	50	50	50		50		50	50	50	50
Q (AI)	0.0163733	0.016696	0.02214	0.0184031		0.0267944		0.0353513	0.0360637	0.0337114	0.0362788
Q* (AI)	0.98	0.98	0.98	0.98		0.98		0.98	0.98	0.98	0.98
Epsilon (AI)	1.01665	1.01698	1.02264	1.01876		1.02753		1.03665	1.03741	1.03489	1.03764
Epsilon*(AI)	50	50	50	50		50		50	50	50	50
Epsilon~(AI)	0.0167074	0.0170367	0.0225918	0.0187787		0.0273412		0.0360727	0.0367997	0.0343994	0.0370191
						Not tested here
				Within Individuals / Within Populations
		Antechinus stuartii							Antechinus agilis
	GRP1	GRP2	GRP3	NSW Aver		Study Aver		VIC Aver	BLR4	CAM5	MUR6
N (WI)	2	2	2	2		2		2	2	2	2
Q (WI)	0.0147324	0.0197075	0.019112	0.0178506		0.027191		0.0365315	0.0370532	0.0362995	0.0362417
Q* (WI)	0.5	0.5	0.5	0.5		0.5		0.5	0.5	0.5	0.5
Omega (WI)	1.01495	1.0201	1.01948	1.01818		1.02795		1.73	1.03848	1.03767	1.0376
Omega*(WI)	2	2	2	2		2		2	2	2	2
Omega~(WI)	0.0294648	0.0394151	0.0382239	0.0357013		0.0543821		0.0730629	0.0741064	0.0725991	0.0724834
						Not tested here

## Sheet: 8-Locus Antechinus SSR Data
8	300	6	50	50	50	50	50	50	2	150	150							Subtract 1 nucleotide from this
# Loci	N-Tot	# Pops	GRP1	GRP2	GRP3	BLR4	CAM5	MUR6	# Regs	BNP	VCH							(Aa2b) locus for A. stuartii only
Region	Pop	Aa7d	Aa7d	Aa2e	Aa2e	Aa2g	Aa2g	Aa4d	Aa4d	Aa7f	Aa7f	Aa7m	Aa7m	Aa4k	Aa4k	Aa2b	Aa2b	←	Aa2b	Aa2b
NSW	GRP1	214	214	182	186	204	204	135	145	253	253	131	135	140	140	142	144		143	145
NSW	GRP1	214	218	182	182	204	204	145	147	253	253	137	139	140	140	142	154		143	155
NSW	GRP1	208	216	182	182	204	204	133	139	253	253	133	133	140	140	146	148		147	149
NSW	GRP1	210	216	182	182	204	204	135	143	253	253	133	133	140	140	144	146		145	147
NSW	GRP1	212	214	182	182	204	204	135	137	253	279	135	139	140	140	144	146		145	147
NSW	GRP1	208	214	182	182	204	204	125	145	253	253	137	143	140	140	144	144		145	145
NSW	GRP1	210	214	182	182	204	204	137	145	253	279	135	139	140	140	142	144		143	145
NSW	GRP1	216	216	182	182	204	204	139	147	253	253	131	141	140	140	146	148		147	149
NSW	GRP1	216	216	182	182	204	204	135	139	253	253	131	131	140	140	144	146		145	147
NSW	GRP1	210	214	182	182	204	204	137	139	253	253	133	137	140	140	142	154		143	155
NSW	GRP1	214	220	182	182	204	204	137	147	253	253	131	131	140	140	144	150		145	151
NSW	GRP1	214	214	182	182	204	204	133	137	253	253	131	133	140	140	144	144		145	145
NSW	GRP1	216	218	182	182	204	204	143	147	253	253	137	139	140	140	144	146		145	147
NSW	GRP1	214	216	182	182	204	204	133	143	253	253	133	139	140	140	144	154		145	155
NSW	GRP1	214	218	182	182	204	204	137	145	253	253	131	133	140	140	144	144		145	145
NSW	GRP1	210	214	182	182	204	204	139	145	253	273	137	139	140	140	144	148		145	149
NSW	GRP1	208	214	182	182	204	204	133	147	253	253	131	133	140	140	144	154		145	155
NSW	GRP1	214	216	182	182	204	204	141	145	253	279	135	139	140	140	144	150		145	151
NSW	GRP1	214	214	182	182	204	204	135	139	253	253	131	139	140	140	142	144		143	145
NSW	GRP1	214	216	182	182	204	204	137	137	253	273	141	141	140	140	144	146		145	147
NSW	GRP1	214	214	182	182	204	204	137	147	273	273	137	141	140	140	144	154		145	155
NSW	GRP1	210	214	182	182	204	204	137	145	253	273	139	141	140	140	146	154		147	155
NSW	GRP1	214	214	182	182	204	204	137	147	273	273	137	141	140	140	144	146		145	147
NSW	GRP1	214	216	182	182	204	204	137	143	253	273	137	139	140	140	144	154		145	155
NSW	GRP1	210	210	182	182	204	204	125	147	253	253	131	133	140	140	142	146		143	147
NSW	GRP1	214	214	182	182	204	204	133	137	253	253	131	133	140	140	144	144		145	145
NSW	GRP1	208	216	182	182	204	204	133	141	253	273	135	141	140	140	144	146		145	147
NSW	GRP1	214	214	182	186	204	204	139	147	253	253	133	139	140	140	144	144		145	145
NSW	GRP1	210	214	182	182	204	204	133	137	253	273	131	137	140	140	142	152		143	153
NSW	GRP1	208	214	182	182	204	204	135	147	253	253	131	139	140	140	144	148		145	149
NSW	GRP1	214	214	182	182	204	204	135	137	253	279	135	139	140	140	144	148		145	149
NSW	GRP1	210	216	186	186	204	204	139	145	253	253	131	133	140	140	144	144		145	145
NSW	GRP1	214	214	182	186	204	204	145	147	253	253	131	131	140	140	144	144		145	145
NSW	GRP1	214	216	182	182	204	204	145	147	253	253	133	133	140	140	144	146		145	147
NSW	GRP1	214	214	182	182	204	204	139	145	253	253	141	141	140	140	144	146		145	147
NSW	GRP1	210	216	182	182	204	204	139	139	253	253	133	133	140	140	144	154		145	155
NSW	GRP1	214	220	182	186	204	204	133	147	253	253	131	139	140	140	144	154		145	155
NSW	GRP1	214	214	182	182	204	204	135	147	253	257	131	133	140	140	146	146		147	147
NSW	GRP1	210	214	182	182	204	204	137	139	253	273	133	137	140	140	146	146		147	147
NSW	GRP1	208	214	182	182	204	204	133	147	253	257	131	137	140	140	144	144		145	145
NSW	GRP1	214	214	182	182	204	204	145	145	253	253	133	139	140	140	144	144		145	145
NSW	GRP1	214	216	182	182	204	204	139	147	253	253	137	137	140	140	144	144		145	145
NSW	GRP1	214	214	182	182	204	218	135	145	253	253	139	141	140	140	144	144		145	145
NSW	GRP1	210	214	182	182	204	204	147	147	253	253	131	139	140	140	144	154		145	155
NSW	GRP1	214	214	182	186	204	204	139	145	253	253	131	139	140	140	144	154		145	155
NSW	GRP1	214	218	182	182	204	204	137	139	253	253	137	139	140	140	144	146		145	147
NSW	GRP1	214	218	182	182	204	204	133	139	253	253	139	139	140	140	146	146		147	147
NSW	GRP1	214	218	182	182	204	204	133	139	253	253	139	139	140	140	146	146		147	147
NSW	GRP1	214	218	182	182	204	204	137	139	253	253	137	139	140	140	144	146		145	147
NSW	GRP1	216	218	182	182	204	204	139	145	253	253	137	139	140	140	148	154		149	155
NSW	GRP2	214	216	182	182	204	204	137	149	253	253	133	139	140	140	144	144		145	145
NSW	GRP2	210	210	182	182	204	204	143	149	253	279	135	143	140	140	144	152		145	153
NSW	GRP2	210	214	182	182	204	204	143	149	253	279	133	135	140	140	144	152		145	153
NSW	GRP2	214	216	182	182	204	204	135	143	253	253	131	141	140	140	144	146		145	147
NSW	GRP2	214	216	182	182	204	204	135	143	253	253	133	139	140	140	144	144		145	145
NSW	GRP2	210	216	182	182	204	204	125	145	253	273	135	143	140	140	144	144		145	145
NSW	GRP2	216	216	182	182	204	204	145	149	253	273	135	139	140	140	144	144		145	145
NSW	GRP2	214	214	182	182	204	204	139	147	253	257	131	141	140	140	144	146		145	147
NSW	GRP2	210	218	182	182	204	204	137	149	253	253	137	139	140	140	144	144		145	145
NSW	GRP2	216	218	182	182	204	204	137	145	253	273	135	137	140	140	144	144		145	145
NSW	GRP2	216	218	182	182	204	204	125	137	253	273	135	143	140	140	144	144		145	145
NSW	GRP2	210	216	182	182	204	204	135	143	253	253	133	141	140	140	142	144		143	145
NSW	GRP2	216	216	182	182	204	204	133	137	253	253	133	135	140	140	142	144		143	145
NSW	GRP2	214	216	182	182	204	204	133	135	253	273	137	141	140	140	144	144		145	145
NSW	GRP2	216	216	182	182	204	204	135	147	253	253	137	139	140	140	144	148		145	149
NSW	GRP2	214	216	182	182	204	204	133	135	253	273	137	141	140	140	144	144		145	145
NSW	GRP2	208	218	182	186	204	204	137	149	253	279	135	137	140	140	144	148		145	149
NSW	GRP2	214	216	182	182	204	204	135	145	253	253	135	137	140	140	144	148		145	149
NSW	GRP2	214	216	182	182	204	204	137	145	253	253	133	135	140	140	144	146		145	147
NSW	GRP2	208	214	182	182	204	204	145	149	253	253	137	139	140	140	144	146		145	147
NSW	GRP2	214	214	182	182	204	204	143	147	253	257	131	131	140	140	144	150		145	151
NSW	GRP2	214	216	182	182	204	204	137	147	253	257	131	131	140	140	144	152		145	153
NSW	GRP2	216	216	182	182	204	204	135	137	253	273	131	141	140	140	144	144		145	145
NSW	GRP2	216	218	182	182	204	204	137	143	253	253	139	141	140	140	144	144		145	145
NSW	GRP2	210	216	182	182	204	204	135	137	253	257	131	133	140	140	144	146		145	147
NSW	GRP2	210	214	182	182	204	204	135	143	253	253	131	141	140	140	144	144		145	145
NSW	GRP2	212	216	182	182	204	204	137	139	253	273	137	141	140	140	144	148		145	149
NSW	GRP2	210	214	182	186	204	204	145	145	253	257	131	135	140	140	144	146		145	147
NSW	GRP2	210	214	182	182	204	204	125	145	253	279	135	141	140	140	144	144		145	145
NSW	GRP2	216	220	182	182	204	204	145	145	253	273	137	137	140	140	146	150		147	151
NSW	GRP2	216	220	186	186	204	204	139	145	253	253	135	137	140	140	144	150		145	151
NSW	GRP2	216	216	182	182	204	204	135	147	253	279	131	135	140	140	144	144		145	145
NSW	GRP2	216	220	182	182	204	204	145	149	253	253	137	141	140	140	144	150		145	151
NSW	GRP2	208	214	182	182	204	204	135	145	253	253	131	131	140	140	144	148		145	149
NSW	GRP2	208	214	182	182	204	204	137	145	253	253	131	141	140	140	144	148		145	149
NSW	GRP2	216	220	188	188	204	204	135	135	253	253	141	141	140	140	144	144		145	145
NSW	GRP2	214	218	182	186	204	204	139	143	253	253	133	135	140	140	144	144		145	145
NSW	GRP2	214	216	186	186	204	204	141	145	253	273	135	135	140	140	144	144		145	145
NSW	GRP2	218	218	182	182	204	204	143	143	253	273	137	143	140	140	144	144		145	145
NSW	GRP2	214	214	182	182	204	204	137	145	253	253	131	141	140	140	144	144		145	145
NSW	GRP2	218	220	182	182	204	204	143	143	253	273	133	137	140	140	144	144		145	145
NSW	GRP2	210	214	182	182	204	204	135	143	253	257	141	141	140	140	144	148		145	149
NSW	GRP2	208	210	182	182	204	204	139	143	253	273	131	141	140	140	144	146		145	147
NSW	GRP2	214	216	182	182	204	204	135	145	253	279	131	133	140	140	144	144		145	145
NSW	GRP2	210	210	182	182	204	204	143	145	253	253	133	135	140	140	144	144		145	145
NSW	GRP2	210	216	182	182	204	204	143	145	253	253	131	133	140	140	144	146		145	147
NSW	GRP2	210	216	182	182	204	204	143	147	273	273	137	141	140	142	144	144		145	145
NSW	GRP2	210	214	182	182	204	204	137	145	253	273	135	141	140	140	144	144		145	145
NSW	GRP2	214	216	186	186	204	204	135	137	253	273	133	141	140	140	144	146		145	147
NSW	GRP2	210	214	182	182	204	204	125	141	253	253	133	135	140	140	148	150		149	151
NSW	GRP3	214	216	182	182	204	204	137	139	253	279	131	135	140	140	144	144		145	145
NSW	GRP3	216	218	182	182	204	204	135	137	253	253	135	139	140	140	146	152		147	153
NSW	GRP3	214	214	182	182	204	204	125	143	253	273	137	141	140	140	146	152		147	153
NSW	GRP3	214	218	182	182	204	204	125	143	253	279	131	137	140	140	146	148		147	149
NSW	GRP3	208	210	188	188	204	204	145	147	253	279	131	135	140	140	142	144		143	145
NSW	GRP3	214	214	182	182	204	204	143	145	253	257	139	143	138	140	146	152		147	153
NSW	GRP3	216	220	182	186	204	216	139	145	253	253	133	139	140	140	144	144		145	145
NSW	GRP3	214	220	182	182	204	204	125	139	253	257	139	141	140	140	144	144		145	145
NSW	GRP3	214	214	182	182	204	204	145	145	253	273	137	137	140	140	146	154		147	155
NSW	GRP3	214	214	182	182	204	204	145	145	253	253	139	141	140	140	144	154		145	155
NSW	GRP3	214	214	182	182	204	204	135	137	253	273	133	139	140	140	144	146		145	147
NSW	GRP3	210	216	182	182	204	204	145	149	253	253	131	141	140	140	144	144		145	145
NSW	GRP3	216	224	182	182	204	204	133	143	253	273	133	137	140	140	140	154		141	155
NSW	GRP3	214	214	182	182	204	204	139	145	253	253	131	137	140	140	144	144		145	145
NSW	GRP3	214	214	182	182	204	204	145	147	253	253	131	137	140	140	144	146		145	147
NSW	GRP3	214	214	182	182	204	204	147	147	273	273	141	141	140	140	144	144		145	145
NSW	GRP3	214	214	182	182	204	204	137	147	253	273	137	141	140	140	144	144		145	145
NSW	GRP3	214	214	182	182	204	204	145	147	253	273	131	141	140	140	144	144		145	145
NSW	GRP3	210	214	182	188	204	204	143	147	273	279	135	141	140	142	142	148		143	149
NSW	GRP3	210	210	182	186	204	204	145	149	253	257	131	135	140	140	144	144		145	145
NSW	GRP3	210	214	182	188	204	204	143	147	253	279	135	139	140	140	144	148		145	149
NSW	GRP3	210	218	182	182	204	204	143	145	253	279	133	135	140	140	144	144		145	145
NSW	GRP3	208	218	182	186	204	204	145	145	253	253	133	139	140	140	144	148		145	149
NSW	GRP3	208	210	182	182	204	204	139	139	253	253	135	137	140	140	144	144		145	145
NSW	GRP3	208	224	182	182	204	204	137	139	253	253	135	139	140	140	144	146		145	147
NSW	GRP3	210	210	182	186	204	204	133	147	253	257	133	141	140	140	146	146		147	147
NSW	GRP3	214	216	186	186	204	204	135	145	253	253	133	141	140	140	144	146		145	147
NSW	GRP3	210	218	182	182	204	204	137	139	253	253	139	139	140	140	144	144		145	145
NSW	GRP3	210	216	182	182	204	204	137	145	257	273	131	141	140	140	144	154		145	155
NSW	GRP3	214	218	182	182	204	204	125	135	253	253	131	135	140	140	140	144		141	145
NSW	GRP3	214	218	182	182	204	204	139	147	253	253	133	139	140	140	144	154		145	155
NSW	GRP3	214	216	182	182	204	204	139	139	253	253	133	135	140	140	152	154		153	155
NSW	GRP3	214	214	182	182	204	204	137	145	253	273	133	141	140	140	144	148		145	149
NSW	GRP3	214	216	182	182	204	218	139	145	253	253	133	139	140	140	144	144		145	145
NSW	GRP3	214	214	182	182	204	204	137	137	253	253	135	141	140	140	144	146		145	147
NSW	GRP3	210	214	182	182	204	204	145	147	253	253	131	133	140	140	144	144		145	145
NSW	GRP3	214	216	182	182	204	204	137	139	253	273	135	141	140	140	144	154		145	155
NSW	GRP3	214	218	182	182	204	204	125	133	253	253	137	141	140	140	146	148		147	149
NSW	GRP3	214	214	182	182	204	204	125	143	253	253	141	141	140	140	144	146		145	147
NSW	GRP3	214	214	182	182	204	204	125	143	253	273	137	141	140	140	146	152		147	153
NSW	GRP3	214	214	182	182	204	204	125	143	253	253	141	141	140	140	144	146		145	147
NSW	GRP3	216	218	182	182	204	204	135	137	253	253	135	139	140	140	146	152		147	153
NSW	GRP3	210	214	182	182	204	204	137	139	273	279	139	141	140	140	144	144		145	145
NSW	GRP3	210	216	182	182	204	204	145	147	253	253	139	139	140	140	144	146		145	147
NSW	GRP3	210	216	182	182	204	204	135	143	253	253	131	143	140	140	144	146		145	147
NSW	GRP3	214	214	182	182	204	204	145	147	253	253	131	135	128	140	144	146		145	147
NSW	GRP3	214	218	182	182	204	204	133	145	253	253	135	141	128	140	144	152		145	153
NSW	GRP3	216	220	182	182	204	204	125	133	253	273	133	137	140	140	144	144		145	145
NSW	GRP3	210	214	182	182	204	204	133	147	253	253	139	139	140	140	144	146		145	147
NSW	GRP3	216	220	182	182	204	204	125	135	253	253	135	139	140	140	144	144		145	145
VIC	BLR4	214	220	202	208	206	218	121	125	243	263	125	133	146	160	124	132		124	132
VIC	BLR4	226	232	202	202	206	210	123	127	257	263	127	133	154	160	124	132		124	132
VIC	BLR4	228	228	206	212	206	206	121	123	263	267	125	133	144	154	114	124		114	124
VIC	BLR4	218	224	200	212	206	206	125	129	243	265	135	137	148	158	118	132		118	132
VIC	BLR4	226	228	202	212	206	212	123	127	243	257	125	127	146	146	118	130		118	130
VIC	BLR4	218	224	208	208	206	208	123	125	257	265	127	137	146	146	120	124		120	124
VIC	BLR4	224	224	212	216	208	210	127	127	243	259	125	141	146	146	126	136		126	136
VIC	BLR4	224	226	212	212	206	218	119	127	263	269	131	133	148	156	114	130		114	130
VIC	BLR4	218	224	200	216	206	218	121	127	257	257	125	133	144	158	120	136		120	136
VIC	BLR4	224	224	182	212	206	206	121	125	243	263	125	137	150	158	124	136		124	136
VIC	BLR4	230	232	210	210	204	208	125	127	243	275	133	137	150	160	130	136		130	136
VIC	BLR4	224	226	202	202	210	218	119	121	263	267	131	139	146	162	118	130		118	130
VIC	BLR4	214	232	182	208	206	208	121	127	263	263	129	139	162	164	124	132		124	132
VIC	BLR4	218	230	198	202	202	204	123	125	261	263	133	133	158	160	118	130		118	130
VIC	BLR4	208	236	198	202	206	206	119	127	257	263	135	135	144	160	114	130		114	130
VIC	BLR4	224	236	212	212	206	206	119	125	261	263	133	137	154	158	126	130		126	130
VIC	BLR4	226	228	202	202	206	212	119	125	263	267	129	131	160	160	124	136		124	136
VIC	BLR4	230	234	182	208	206	206	123	125	263	263	123	133	150	158	122	136		122	136
VIC	BLR4	222	226	210	210	198	206	119	127	259	263	125	133	146	152	118	132		118	132
VIC	BLR4	228	230	182	206	206	206	121	129	243	263	125	135	148	150	128	136		128	136
VIC	BLR4	224	232	202	204	202	212	123	127	263	263	133	135	152	156	114	118		114	118
VIC	BLR4	224	230	210	212	198	206	123	127	257	263	133	137	146	160	124	130		124	130
VIC	BLR4	224	230	204	208	202	206	123	131	263	267	135	139	154	162	132	132		132	132
VIC	BLR4	224	232	202	204	202	212	123	127	263	263	133	135	152	156	114	118		114	118
VIC	BLR4	224	224	188	202	204	208	121	121	263	265	135	139	146	162	128	132		128	132
VIC	BLR4	216	228	198	208	206	208	123	127	243	259	125	133	150	150	124	128		124	128
VIC	BLR4	226	230	208	208	208	214	123	127	263	267	125	131	144	158	130	132		130	132
VIC	BLR4	216	230	196	208	204	206	121	123	243	263	137	139	148	166	128	134		128	134
VIC	BLR4	230	230	198	210	206	210	127	127	263	263	135	137	154	164	116	136		116	136
VIC	BLR4	216	230	182	206	202	208	121	123	243	243	129	133	144	154	124	126		124	126
VIC	BLR4	222	232	204	208	206	208	127	135	265	265	131	133	148	152	132	134		132	134
VIC	BLR4	216	230	196	208	204	206	121	123	243	263	137	139	148	166	128	134		128	134
VIC	BLR4	214	222	206	208	206	206	119	127	243	261	125	133	158	160	128	132		128	132
VIC	BLR4	214	224	182	214	204	206	121	127	243	263	137	139	144	146	118	132		118	132
VIC	BLR4	224	230	206	210	206	206	125	131	243	257	125	125	144	160	136	138		136	138
VIC	BLR4	214	222	208	212	206	206	121	125	263	271	133	133	148	160	118	132		118	132
VIC	BLR4	226	228	202	210	208	210	125	127	243	243	125	139	150	158	132	136		132	136
VIC	BLR4	222	234	206	208	206	206	119	127	261	265	125	137	148	162	118	124		118	124
VIC	BLR4	230	230	204	214	206	208	123	127	243	269	125	125	150	162	132	134		132	134
VIC	BLR4	208	226	182	210	206	208	121	121	257	265	127	137	160	164	118	132		118	132
VIC	BLR4	228	230	210	212	206	208	123	127	263	271	125	137	144	158	118	122		118	122
VIC	BLR4	226	228	210	212	202	208	121	127	243	263	125	135	158	160	124	136		124	136
VIC	BLR4	226	226	204	214	206	208	123	127	263	265	133	133	144	158	114	130		114	130
VIC	BLR4	222	224	202	214	206	206	127	129	263	263	137	137	158	160	118	134		118	134
VIC	BLR4	214	222	202	204	198	206	121	127	261	263	127	135	144	160	124	126		124	126
VIC	BLR4	224	232	206	208	206	208	119	129	263	269	133	137	148	164	114	124		114	124
VIC	BLR4	232	236	198	206	206	216	123	127	243	257	127	137	160	164	116	124		116	124
VIC	BLR4	216	224	210	214	206	208	121	127	243	243	133	139	152	154	124	132		124	132
VIC	BLR4	228	230	210	212	206	208	123	127	263	271	125	137	144	158	118	122		118	122
VIC	BLR4	226	236	202	212	206	206	121	127	243	243	133	135	160	160	118	136		118	136
VIC	CAM5	230	236	208	208	206	214	125	127	261	271	131	133	150	162	114	118		114	118
VIC	CAM5	222	224	204	212	206	210	121	127	259	265	131	133	144	150	120	122		120	122
VIC	CAM5	228	230	182	214	202	208	127	131	263	263	131	131	158	160	126	132		126	132
VIC	CAM5	222	232	188	216	206	206	119	121	243	265	133	135	146	158	124	128		124	128
VIC	CAM5	222	234	182	214	204	216	119	125	259	261	137	137	160	166	126	132		126	132
VIC	CAM5	228	230	182	214	202	208	127	131	263	263	131	131	158	160	126	132		126	132
VIC	CAM5	214	228	204	210	198	206	119	119	259	265	137	137	144	158	120	128		120	128
VIC	CAM5	228	232	208	216	206	206	123	127	243	265	125	139	144	162	124	128		124	128
VIC	CAM5	218	232	212	216	204	206	127	127	259	259	125	137	144	146	124	134		124	134
VIC	CAM5	228	238	202	210	206	206	121	123	263	265	133	135	146	150	118	126		118	126
VIC	CAM5	218	226	204	210	206	206	119	123	265	273	129	133	146	158	120	134		120	134
VIC	CAM5	232	232	214	216	202	206	127	127	257	263	133	135	150	162	114	120		114	120
VIC	CAM5	228	230	206	210	208	210	119	127	243	257	133	137	158	166	118	128		118	128
VIC	CAM5	214	228	192	202	202	206	125	127	243	271	125	137	152	158	118	120		118	120
VIC	CAM5	218	222	206	210	206	206	127	127	243	265	133	135	158	162	120	130		120	130
VIC	CAM5	222	228	208	212	206	208	119	127	243	275	137	137	146	148	122	126		122	126
VIC	CAM5	228	230	202	210	206	208	123	129	243	243	139	139	144	144	120	120		120	120
VIC	CAM5	214	224	210	212	206	206	119	123	263	265	123	135	144	146	130	132		130	132
VIC	CAM5	214	226	198	208	204	206	123	129	261	263	139	139	146	154	128	128		128	128
VIC	CAM5	214	214	192	210	204	214	119	127	259	263	137	137	150	162	114	126		114	126
VIC	CAM5	214	232	214	216	202	206	127	127	259	261	127	139	150	162	120	128		120	128
VIC	CAM5	222	226	208	214	206	206	119	127	263	265	133	137	152	158	128	134		128	134
VIC	CAM5	228	230	202	208	206	208	119	125	263	271	125	135	158	166	130	130		130	130
VIC	CAM5	214	222	208	210	204	206	123	127	243	263	125	133	156	162	118	120		118	120
VIC	CAM5	228	230	206	208	206	206	127	127	267	271	135	137	158	162	118	120		118	120
VIC	CAM5	222	224	206	212	206	208	127	127	243	271	129	139	150	154	124	130		124	130
VIC	CAM5	226	230	202	214	206	206	119	125	267	267	137	137	154	158	122	128		122	128
VIC	CAM5	224	230	182	208	206	206	119	127	257	267	125	139	160	162	118	124		118	124
VIC	CAM5	230	230	188	204	206	210	123	127	265	275	133	137	144	150	114	120		114	120
VIC	CAM5	230	232	198	204	198	206	127	127	243	265	125	135	146	150	126	132		126	132
VIC	CAM5	222	226	202	206	206	210	123	127	265	269	133	135	158	158	122	136		122	136
VIC	CAM5	222	230	208	212	206	206	123	127	263	265	131	139	142	150	120	132		120	132
VIC	CAM5	218	224	206	212	206	214	125	127	261	267	125	125	120	146	126	130		126	130
VIC	CAM5	232	232	182	212	204	214	119	123	259	265	133	135	150	154	114	128		114	128
VIC	CAM5	228	228	208	208	206	208	125	127	265	267	133	137	144	158	128	130		128	130
VIC	CAM5	224	230	202	212	202	206	119	127	243	267	131	137	146	154	126	128		126	128
VIC	CAM5	222	228	182	210	206	216	121	127	273	273	125	137	160	162	114	136		114	136
VIC	CAM5	214	232	204	210	206	208	119	127	265	265	127	143	160	162	118	128		118	128
VIC	CAM5	224	230	206	210	206	210	123	127	243	263	133	139	156	160	120	126		120	126
VIC	CAM5	224	228	198	204	206	206	119	123	257	265	133	137	158	162	126	128		126	128
VIC	CAM5	224	230	208	216	204	206	119	127	261	263	131	137	154	158	114	126		114	126
VIC	CAM5	224	230	202	210	206	208	127	129	243	265	133	133	160	160	132	132		132	132
VIC	CAM5	224	226	202	208	208	214	123	129	243	243	129	139	154	160	124	124		124	124
VIC	CAM5	230	230	204	208	206	206	119	123	245	263	135	137	158	160	118	124		118	124
VIC	CAM5	224	224	206	212	206	206	125	127	243	263	133	135	148	160	118	134		118	134
VIC	CAM5	208	232	206	208	206	206	127	127	243	263	135	139	146	158	118	118		118	118
VIC	CAM5	224	234	188	208	204	208	119	127	265	265	125	139	150	156	120	128		120	128
VIC	CAM5	226	230	208	212	206	218	119	129	263	269	137	137	150	156	114	118		114	118
VIC	CAM5	224	234	198	208	206	208	121	127	259	265	125	127	150	156	118	128		118	128
VIC	CAM5	226	230	204	208	206	206	119	127	243	263	135	137	148	152	124	132		124	132
VIC	MUR6	224	230	212	218	206	206	123	127	255	263	133	135	154	160	132	136		132	136
VIC	MUR6	228	230	204	210	206	206	129	129	243	265	125	135	146	156	126	130		126	130
VIC	MUR6	230	230	212	212	206	210	125	129	259	265	125	137	158	160	118	124		118	124
VIC	MUR6	214	234	198	212	208	224	121	129	271	273	133	137	144	160	114	118		114	118
VIC	MUR6	222	232	210	212	204	206	123	127	265	267	137	139	160	166	124	136		124	136
VIC	MUR6	222	228	202	208	198	208	131	133	265	271	133	133	150	160	124	132		124	132
VIC	MUR6	230	230	204	212	206	212	119	125	261	263	135	139	144	160	116	130		116	130
VIC	MUR6	214	236	204	212	206	206	121	123	263	273	133	135	160	160	130	130		130	130
VIC	MUR6	222	236	202	204	206	206	123	129	263	269	129	133	144	150	130	132		130	132
VIC	MUR6	214	226	202	208	206	208	123	125	243	267	133	137	158	166	114	136		114	136
VIC	MUR6	228	230	182	212	206	212	119	129	263	267	135	137	146	156	126	126		126	126
VIC	MUR6	222	232	206	214	204	210	123	127	255	267	133	137	146	162	126	130		126	130
VIC	MUR6	228	228	198	212	206	208	119	127	243	263	135	137	146	158	114	130		114	130
VIC	MUR6	214	228	182	208	206	210	123	129	243	265	133	139	152	154	120	134		120	134
VIC	MUR6	224	228	206	212	206	208	121	127	243	263	137	137	144	160	124	130		124	130
VIC	MUR6	232	232	210	214	204	206	123	127	255	267	133	137	158	160	116	124		116	124
VIC	MUR6	224	224	202	212	208	208	123	127	257	269	129	137	154	154	114	114		114	114
VIC	MUR6	214	224	182	202	206	210	119	119	257	267	125	127	156	160	116	124		116	124
VIC	MUR6	214	230	182	214	206	206	123	125	243	257	125	137	144	160	126	136		126	136
VIC	MUR6	214	228	182	208	206	210	123	129	243	265	133	139	152	154	120	134		120	134
VIC	MUR6	226	230	182	210	206	206	123	127	261	265	135	139	146	160	130	130		130	130
VIC	MUR6	228	230	198	208	206	206	119	121	265	269	125	133	152	158	120	130		120	130
VIC	MUR6	222	226	202	208	206	210	123	125	265	269	125	133	144	144	118	132		118	132
VIC	MUR6	208	234	198	204	206	206	129	131	265	269	133	137	146	148	124	124		124	124
VIC	MUR6	230	232	202	208	206	208	119	121	255	263	133	137	144	158	114	118		114	118
VIC	MUR6	214	230	206	210	208	208	123	125	263	267	125	133	160	162	124	130		124	130
VIC	MUR6	208	218	208	212	206	208	125	125	243	265	137	137	146	158	118	130		118	130
VIC	MUR6	232	234	202	204	206	206	121	127	263	263	133	137	150	154	130	130		130	130
VIC	MUR6	222	224	198	198	206	206	123	127	263	271	125	137	148	152	116	130		116	130
VIC	MUR6	224	224	192	202	206	206	119	125	243	273	129	133	144	146	128	130		128	130
VIC	MUR6	216	230	182	202	208	210	121	125	269	273	125	127	146	156	118	124		118	124
VIC	MUR6	214	230	204	210	206	218	119	119	261	271	125	129	160	166	132	132		132	132
VIC	MUR6	216	224	206	206	206	210	123	131	243	265	125	137	146	162	124	124		124	124
VIC	MUR6	228	236	206	208	208	214	125	127	243	257	133	133	148	152	116	124		116	124
VIC	MUR6	224	230	206	212	206	208	125	127	243	257	125	137	148	162	124	124		124	124
VIC	MUR6	222	222	206	206	208	208	119	129	263	265	129	137	146	162	118	126		118	126
VIC	MUR6	224	224	206	210	208	212	121	127	243	243	133	139	144	146	128	132		128	132
VIC	MUR6	228	232	206	208	204	208	121	125	243	271	127	137	148	158	128	136		128	136
VIC	MUR6	232	234	202	204	206	206	121	127	263	263	133	137	150	154	130	130		130	130
VIC	MUR6	208	224	198	208	208	208	121	127	243	263	135	137	148	160	130	138		130	138
VIC	MUR6	224	230	208	210	204	206	127	127	257	263	133	137	144	158	114	118		114	118
VIC	MUR6	218	222	182	210	206	208	121	125	257	265	133	133	154	166	120	136		120	136
VIC	MUR6	224	230	208	212	206	208	125	129	263	263	137	137	154	162	124	136		124	136
VIC	MUR6	230	232	208	210	206	208	121	123	255	269	129	133	160	164	116	136		116	136
VIC	MUR6	226	228	202	208	206	208	127	127	243	243	127	139	156	158	118	124		118	124
VIC	MUR6	224	230	204	208	204	208	119	119	257	263	125	133	158	162	130	130		130	130
VIC	MUR6	218	224	206	208	206	206	117	121	263	273	129	137	144	164	124	130		124	130
VIC	MUR6	224	230	212	212	206	208	125	127	257	265	133	135	150	160	124	136		124	136
VIC	MUR6	228	232	208	212	206	208	125	125	243	269	129	133	144	146	124	132		124	132
VIC	MUR6	224	230	206	220	206	210	119	129	243	257	125	125	148	150	118	132		118	132
		Aa7d		Aa2e		Aa2g		Aa4d		Aa7f		Aa7m		Aa4k		Aa2b
		Min	MAX	Min	MAX	Min	MAX	Min	MAX	Min	MAX	Min	MAX	Min	MAX	Min	MAX		Min	MAX
		208	238	182	220	198	224	117	149	243	279	123	143	120	166	114	154		114-138	141-155
		# Steps	max d2	# Steps	max d2	# Steps	max d2	# Steps	max d2	# Steps	max d2	# Steps	max d2	# Steps	max d2	# Steps	max d2
																Converted	2-Step		One -3 Step
		15	225	19	361	13	169	16	256	18	324	10	100	23	529	20	400		20	400
		# Steps	max d2	# Steps	max d2	# Steps	max d2	# Steps	max d2	# Steps	max d2	# Steps	max d2	# Steps	max d2	# Steps	max d2

## Sheet: DR Aver GD Matr
8	600	6	100	100	100	100	100	100	2	300	300		8-Locus Average
# Loci	2N-TOT	# Pops	GRP1	GRP2	GRP3	BLR4	CAM5	MUR6	# Regs	BNP	VCH
NSW.1	NSW.2	NSW.1	NSW.2	NSW.1	NSW.2	NSW.1	NSW.2	NSW.1	NSW.2	NSW.1	NSW.2	NSW.1	NSW.2	NSW.1	NSW.2	NSW.1	NSW.2	NSW.1	NSW.2	NSW.1	NSW.2	NSW.1	NSW.2	NSW.1	NSW.2	NSW.1	NSW.2	NSW.1	NSW.2	NSW.1	NSW.2	NSW.1	NSW.2	NSW.1	NSW.2	NSW.1	NSW.2	NSW.1	NSW.2	NSW.1	NSW.2	NSW.1	NSW.2	NSW.1	NSW.2	NSW.1	NSW.2	NSW.1	NSW.2
0	0.0189046	0.023457	0.0510503	0.00798828	0.00657118	0.00378472	0.0108681	0.00586806	0.0869389	0.0287695	0.0575195	0.0077105	0.0977202	0.00375868	0.0521962	0.000868056	0.00375868	0.0039605	0.0244531	0.000800781	0.0275781	0.000800781	0.00205078	0.0199306	0.0410503	0.00205078	0.0396181	0.000800781	0.0159918	0.0157378	0.0735998	0.00580078	0.0300781	0.00970703	0.102963	0	0.0222656	0.0320508	0.0721241	0.050631	0.0986584	0.0239605	0.0932873	0.050631	0.0886584	0.0120508	0.0781983	0.0144293	0.0223003
0.0189046	0	0.00294754	0.016908	0.0255257	0.00883513	0.0170643	0.00399138	0.0141476	0.0797107	0.0564632	0.021385	0.0117323	0.0715857	0.0116476	0.0149289	0.0191476	0.0116476	0.0129823	0.0148421	0.0141975	0.0146858	0.0239632	0.0104475	0.00367888	0.00940804	0.0202132	0.0152414	0.0141975	0.00485726	0.00925179	0.0462153	0.0289632	0.0109358	0.00333817	0.0749537	0.0189046	0.0107796	0.0204475	0.0598958	0.0490278	0.0595161	0.0167323	0.0590278	0.0490278	0.0520161	0.0104475	0.0538216	0.0577479	0.00565805
0.023457	0.00294754	0	0.0152105	0.0288281	0.0127626	0.0197418	0.00729384	0.0143251	0.0755131	0.0541406	0.0115625	0.0112847	0.0667631	0.0174501	0.00885634	0.0243251	0.0174501	0.0150347	0.0156445	0.019375	0.0217383	0.0291406	0.013125	0.00135634	0.0052105	0.0228906	0.0135438	0.019375	0.00753472	0.00692925	0.0426427	0.0341406	0.0167383	0.00351562	0.0720062	0.023457	0.00595703	0.013125	0.0531983	0.0467052	0.0553185	0.0125347	0.0548302	0.0467052	0.0453185	0.008125	0.0521241	0.0623003	0.0089605
0.0510503	0.016908	0.0152105	0	0.0540647	0.0224306	0.0455295	0.0187587	0.0353906	0.0846299	0.0820334	0.015523	0.0373459	0.0757236	0.0333681	0.00461806	0.0459462	0.0333681	0.0435959	0.0112847	0.0422418	0.0218056	0.0539605	0.0334918	0.0115712	0.005	0.0452105	0.00250868	0.0422418	0.0195508	0.0257639	0.0441032	0.0656272	0.0134722	0.0194293	0.0674945	0.0510503	0.0178472	0.0234918	0.0575928	0.062072	0.0420525	0.0260959	0.0425407	0.062072	0.0470525	0.0234918	0.0410889	0.0992209	0.0251389
0.00798828	0.0255257	0.0288281	0.0540647	0	0.0135959	0.00135634	0.0210959	0.004273	0.0834037	0.013125	0.0541406	0.00500868	0.0993412	0.0145334	0.0531272	0.0109397	0.0145334	0.00375868	0.0193945	0.00851562	0.0464258	0.0065625	0.00726563	0.0264084	0.0490647	0.0053125	0.0373459	0.00851562	0.0317795	0.0102626	0.0727209	0.0015625	0.0339258	0.014375	0.104168	0.00798828	0.020957	0.0272656	0.0694223	0.0508459	0.092506	0.0137587	0.0861584	0.0508459	0.087506	0.0122656	0.0759262	0.0108681	0.0244813
0.00657118	0.00883513	0.0127626	0.0224306	0.0135959	0	0.00820312	0.00226562	0.00667535	0.0778069	0.0390647	0.0374501	0.00955078	0.0826507	0.0015625	0.0278125	0.00445312	0.0015625	0.00830078	0.00836806	0.00354384	0.0115972	0.00745009	0.00229384	0.00820312	0.0199306	0.00620009	0.0160156	0.00354384	0.00620009	0.01125	0.0547803	0.0157834	0.0111806	0.00354384	0.0811576	0.00657118	0.0130556	0.0222938	0.059381	0.0458741	0.0697608	0.0170508	0.0663428	0.0458741	0.0672608	0.00729384	0.0545959	0.0329883	0.013125
0.00378472	0.0170643	0.0197418	0.0455295	0.00135634	0.00820312	0	0.013125	0.00180556	0.0794736	0.0177626	0.0456793	0.00205078	0.0908799	0.00851562	0.0438281	0.00625	0.00851562	0.000800781	0.0169878	0.0039605	0.0355295	0.0039605	0.0027105	0.0178125	0.0380295	0.0027105	0.031875	0.0039605	0.0210959	0.00695312	0.0655095	0.00229384	0.0276128	0.00786675	0.0964701	0.00378472	0.0154253	0.0227105	0.064381	0.0462907	0.0861931	0.0120508	0.080822	0.0462907	0.0786931	0.0077105	0.0704552	0.0137695	0.0178906
0.0108681	0.00399138	0.00729384	0.0187587	0.0210959	0.00226562	0.013125	0	0.0115972	0.0814007	0.0537522	0.0326063	0.0118945	0.0778069	0.00320312	0.0222656	0.009375	0.00320312	0.0106445	0.0125087	0.00651259	0.00667535	0.0143251	0.00526259	0.0053125	0.0137587	0.0130751	0.01625	0.00651259	0.00135634	0.0122656	0.0511866	0.0226584	0.00750868	0.00260634	0.0781889	0.0108681	0.0140712	0.0252626	0.0629748	0.0488428	0.0660889	0.0206445	0.0646241	0.0488428	0.0610889	0.0102626	0.0548302	0.0470508	0.00695312
0.00586806	0.0141476	0.0143251	0.0353906	0.004273	0.00667535	0.00180556	0.0115972	0	0.071557	0.0156793	0.0327626	0.00135634	0.0829632	0.00948785	0.0323003	0.00722222	0.00948785	0.00260634	0.0115712	0.00604384	0.0342795	0.00604384	0.00229384	0.0112847	0.0278906	0.00229384	0.0228472	0.00604384	0.018457	0.00375868	0.0575928	0.0077105	0.0271962	0.00495009	0.0874424	0.00586806	0.00750868	0.0122938	0.0528532	0.0408741	0.0757764	0.00635634	0.0704053	0.0408741	0.0682764	0.00229384	0.0614275	0.0180751	0.0196962
0.0869389	0.0797107	0.0755131	0.0846299	0.0834037	0.0778069	0.0794736	0.0814007	0.071557	0	0.0893412	0.0783256	0.0736728	0.008125	0.0862445	0.0795257	0.086557	0.0862445	0.0799228	0.0719389	0.0855131	0.103658	0.0874662	0.0767631	0.0717132	0.0796299	0.0787162	0.0751507	0.0855131	0.0867978	0.0694736	0.0115972	0.0924662	0.0936577	0.0724662	0.00961806	0.0869389	0.0660014	0.0667631	0.00527778	0.00503472	0.0219293	0.0674228	0.0175347	0.00503472	0.0169293	0.0667631	0.0134223	0.106251	0.0908799
0.0287695	0.0564632	0.0541406	0.0820334	0.013125	0.0390647	0.0177626	0.0537522	0.0156793	0.0893412	0	0.0650781	0.0196962	0.120279	0.0443772	0.0742209	0.0323459	0.0443772	0.0234462	0.0367383	0.0338281	0.0931445	0.0240625	0.0275781	0.0484397	0.0745334	0.0178125	0.0575022	0.0338281	0.067717	0.0244813	0.0949084	0.0190625	0.0768945	0.0375	0.12698	0.0287695	0.0301758	0.0275781	0.0703598	0.0611584	0.115475	0.0196962	0.105221	0.0611584	0.107975	0.0225781	0.0960824	0.0121181	0.0649501
0.0575195	0.021385	0.0115625	0.015523	0.0541406	0.0374501	0.0456793	0.0326063	0.0327626	0.0783256	0.0650781	0	0.0303472	0.0702006	0.0502626	0.00354384	0.0577626	0.0502626	0.0415972	0.023457	0.0528125	0.0533008	0.0625781	0.0390625	0.0122938	0.008023	0.0488281	0.0138563	0.0528125	0.0334722	0.0178668	0.0448302	0.0675781	0.0395508	0.0219531	0.0735687	0.0575195	0.00939453	0.0090625	0.0485108	0.0576427	0.048131	0.0153472	0.0476427	0.0576427	0.040631	0.0190625	0.0524366	0.0963628	0.034273
0.0077105	0.0117323	0.0112847	0.0373459	0.00500868	0.00955078	0.00205078	0.0118945	0.00135634	0.0736728	0.0196962	0.0303472	0	0.0805478	0.0117383	0.0312695	0.0108008	0.0117383	0.00125	0.0152105	0.00753472	0.0360959	0.00948785	0.00378472	0.010957	0.0273459	0.00573785	0.0256445	0.00753472	0.0182639	0.00205078	0.0564275	0.00782118	0.0269293	0.00448785	0.0880131	0.0077105	0.008023	0.0137847	0.0560802	0.042365	0.0755095	0.00625	0.071115	0.042365	0.0655095	0.00378472	0.0642248	0.0225781	0.014707
0.0977202	0.0715857	0.0667631	0.0757236	0.0993412	0.0826507	0.0908799	0.0778069	0.0829632	0.008125	0.120279	0.0702006	0.0805478	0	0.0904632	0.0687445	0.0979632	0.0904632	0.0867978	0.0786576	0.0930131	0.0935014	0.102779	0.0842631	0.0674945	0.0682236	0.0940287	0.074057	0.0930131	0.0786728	0.0730674	0.00472222	0.107779	0.0847514	0.0721537	0.00336806	0.0977202	0.0695952	0.0742631	0.0134028	0.0125347	0.013023	0.0755478	0.0125347	0.0125347	0.005523	0.0742631	0.0123286	0.136563	0.0794736
0.00375868	0.0116476	0.0174501	0.0333681	0.0145334	0.0015625	0.00851562	0.00320312	0.00948785	0.0862445	0.0443772	0.0502626	0.0117383	0.0904632	0	0.039375	0.00226562	0	0.00798828	0.0168056	0.00135634	0.0112847	0.00526259	0.00260634	0.0135156	0.0283681	0.00651259	0.0269531	0.00135634	0.00651259	0.0165625	0.0638428	0.0135959	0.0146181	0.00635634	0.0908452	0.00375868	0.0208681	0.0326063	0.0703185	0.0511866	0.0831983	0.0254883	0.0797803	0.0511866	0.0781983	0.0126063	0.0655334	0.0301758	0.0140625
0.0521962	0.0149289	0.00885634	0.00461806	0.0531272	0.0278125	0.0438281	0.0222656	0.0323003	0.0795257	0.0742209	0.00354384	0.0312695	0.0687445	0.039375	0	0.0500781	0.039375	0.0400195	0.0161806	0.0452626	0.0337847	0.0569813	0.0340126	0.00820312	0.00211806	0.0457313	0.00601562	0.0452626	0.0222938	0.0190625	0.0408741	0.0653147	0.0233681	0.0174501	0.0672514	0.0521962	0.0108681	0.0140126	0.0510998	0.0575928	0.0419483	0.0187695	0.0424366	0.0575928	0.0394483	0.0190126	0.0445959	0.0981445	0.0253125
0.000868056	0.0191476	0.0243251	0.0459462	0.0109397	0.00445312	0.00625	0.009375	0.00722222	0.086557	0.0323459	0.0577626	0.0108008	0.0979632	0.00226562	0.0500781	0	0.00226562	0.00705078	0.0215712	0.00104384	0.0226128	0.00104384	0.00229384	0.0190625	0.0384462	0.00229384	0.035625	0.00104384	0.0140126	0.0182031	0.0725928	0.00937717	0.0271962	0.00995009	0.10022	0.000868056	0.0225087	0.0322938	0.070631	0.0508741	0.0957764	0.0258008	0.0904053	0.0508741	0.0882764	0.0122938	0.0742052	0.0175195	0.0241406
0.00375868	0.0116476	0.0174501	0.0333681	0.0145334	0.0015625	0.00851562	0.00320312	0.00948785	0.0862445	0.0443772	0.0502626	0.0117383	0.0904632	0	0.039375	0.00226562	0	0.00798828	0.0168056	0.00135634	0.0112847	0.00526259	0.00260634	0.0135156	0.0283681	0.00651259	0.0269531	0.00135634	0.00651259	0.0165625	0.0638428	0.0135959	0.0146181	0.00635634	0.0908452	0.00375868	0.0208681	0.0326063	0.0703185	0.0511866	0.0831983	0.0254883	0.0797803	0.0511866	0.0781983	0.0126063	0.0655334	0.0301758	0.0140625
0.0039605	0.0129823	0.0150347	0.0435959	0.00375868	0.00830078	0.000800781	0.0106445	0.00260634	0.0799228	0.0234462	0.0415972	0.00125	0.0867978	0.00798828	0.0400195	0.00705078	0.00798828	0	0.0189605	0.00378472	0.0323459	0.00573785	0.00253472	0.014707	0.0335959	0.00448785	0.0318945	0.00378472	0.0170139	0.00580078	0.0626775	0.00407118	0.0256793	0.00573785	0.0942631	0.0039605	0.014273	0.0225347	0.0648302	0.046115	0.0842595	0.0125	0.079865	0.046115	0.0742595	0.00753472	0.0704748	0.0188281	0.013457
0.0244531	0.0148421	0.0156445	0.0112847	0.0193945	0.00836806	0.0169878	0.0125087	0.0115712	0.0719389	0.0367383	0.023457	0.0152105	0.0786576	0.0168056	0.0161806	0.0215712	0.0168056	0.0189605	0	0.0195508	0.0253125	0.023457	0.0133008	0.0103212	0.0162847	0.017207	0.00375868	0.0195508	0.0194293	0.0100347	0.0470373	0.028457	0.0128125	0.00955078	0.0726507	0.0244531	0.0090625	0.0133008	0.0496241	0.046881	0.0513927	0.0089605	0.0479748	0.046881	0.0563927	0.00830078	0.0423389	0.048648	0.0200347
0.000800781	0.0141975	0.019375	0.0422418	0.00851562	0.00354384	0.0039605	0.00651259	0.00604384	0.0855131	0.0338281	0.0528125	0.00753472	0.0930131	0.00135634	0.0452626	0.00104384	0.00135634	0.00378472	0.0195508	0	0.0200195	0.00195312	0.00125	0.0162001	0.0347418	0.00320312	0.0327626	0	0.0112847	0.0139605	0.0676427	0.00695312	0.0212695	0.00695312	0.0963812	0.000800781	0.0204883	0.03125	0.0706983	0.0498302	0.0898498	0.0225347	0.0854552	0.0498302	0.0823498	0.01125	0.0713428	0.0201128	0.0159918
0.0275781	0.0146858	0.0217383	0.0218056	0.0464258	0.0115972	0.0355295	0.00667535	0.0342795	0.103658	0.0931445	0.0533008	0.0360959	0.0935014	0.0112847	0.0337847	0.0226128	0.0112847	0.0323459	0.0253125	0.0200195	0	0.0317383	0.0212695	0.0182378	0.0218056	0.0329883	0.0254253	0.0200195	0.00510634	0.0357639	0.064381	0.0467383	0.0075	0.017207	0.0879111	0.0275781	0.035625	0.0512695	0.0855095	0.0698498	0.0760802	0.0473459	0.0765685	0.0698498	0.0760802	0.0312695	0.0640056	0.0779709	0.0163889
0.000800781	0.0239632	0.0291406	0.0539605	0.0065625	0.00745009	0.0039605	0.0143251	0.00604384	0.0874662	0.0240625	0.0625781	0.00948785	0.102779	0.00526259	0.0569813	0.00104384	0.00526259	0.00573785	0.023457	0.00195312	0.0317383	0	0.00320312	0.0240126	0.0464605	0.00125	0.0405751	0.00195312	0.0210503	0.0178668	0.0774084	0.005	0.0329883	0.0128125	0.106147	0.000800781	0.0243945	0.0332031	0.0726514	0.0517834	0.101569	0.0244878	0.0952209	0.0517834	0.0940685	0.0132031	0.0791553	0.0103472	0.0277105
0.00205078	0.0104475	0.013125	0.0334918	0.00726563	0.00229384	0.0027105	0.00526259	0.00229384	0.0767631	0.0275781	0.0390625	0.00378472	0.0842631	0.00260634	0.0340126	0.00229384	0.00260634	0.00253472	0.0133008	0.00125	0.0212695	0.00320312	0	0.00995009	0.0259918	0.00195312	0.0240126	0.00125	0.0100347	0.0077105	0.0588927	0.00820312	0.0200195	0.00320312	0.0876312	0.00205078	0.0117383	0.02	0.0594483	0.0435802	0.0785998	0.0137847	0.0742052	0.0435802	0.0710998	0.005	0.0625928	0.0213628	0.0147418
0.0199306	0.00367888	0.00135634	0.0115712	0.0264084	0.00820312	0.0178125	0.0053125	0.0112847	0.0717132	0.0484397	0.0122938	0.010957	0.0674945	0.0135156	0.00820312	0.0190625	0.0135156	0.014707	0.0103212	0.0162001	0.0182378	0.0240126	0.00995009	0	0.00407118	0.0177626	0.0090625	0.0162001	0.00604384	0.00695312	0.0421241	0.0323459	0.0153212	0.00229384	0.0697514	0.0199306	0.00375868	0.00995009	0.0482873	0.0435303	0.0539014	0.010957	0.0524366	0.0435303	0.0464014	0.00495009	0.0476427	0.0561133	0.0122656
0.0410503	0.00940804	0.0052105	0.005	0.0490647	0.0199306	0.0380295	0.0137587	0.0278906	0.0796299	0.0745334	0.008023	0.0273459	0.0682236	0.0283681	0.00211806	0.0384462	0.0283681	0.0335959	0.0162847	0.0347418	0.0218056	0.0464605	0.0259918	0.00407118	0	0.0377105	0.00750868	0.0347418	0.0120508	0.0182639	0.0416032	0.0581272	0.0184722	0.0119293	0.0674945	0.0410503	0.0103472	0.0159918	0.0525928	0.054572	0.0470525	0.0210959	0.0475407	0.054572	0.0420525	0.0159918	0.0460889	0.0892209	0.0201389
0.00205078	0.0202132	0.0228906	0.0452105	0.0053125	0.00620009	0.0027105	0.0130751	0.00229384	0.0787162	0.0178125	0.0488281	0.00573785	0.0940287	0.00651259	0.0457313	0.00229384	0.00651259	0.00448785	0.017207	0.00320312	0.0329883	0.00125	0.00195312	0.0177626	0.0377105	0	0.0318251	0.00320312	0.0198003	0.0116168	0.0686584	0.00625	0.0317383	0.0090625	0.0973968	0.00205078	0.0156445	0.0219531	0.0614014	0.0455334	0.0903185	0.0157378	0.0839709	0.0455334	0.0828185	0.00695312	0.0704053	0.0115972	0.0264605
0.0396181	0.0152414	0.0135438	0.00250868	0.0373459	0.0160156	0.031875	0.01625	0.0228472	0.0751507	0.0575022	0.0138563	0.0256445	0.074057	0.0269531	0.00601562	0.035625	0.0269531	0.0318945	0.00375868	0.0327626	0.0254253	0.0405751	0.0240126	0.0090625	0.00750868	0.0318251	0	0.0327626	0.0201063	0.0160156	0.0424366	0.0489084	0.0137587	0.0138563	0.0669389	0.0396181	0.0103212	0.0140126	0.0492248	0.0525928	0.0423389	0.0143945	0.0408741	0.0525928	0.0473389	0.0140126	0.0385802	0.0758008	0.0232031
0.000800781	0.0141975	0.019375	0.0422418	0.00851562	0.00354384	0.0039605	0.00651259	0.00604384	0.0855131	0.0338281	0.0528125	0.00753472	0.0930131	0.00135634	0.0452626	0.00104384	0.00135634	0.00378472	0.0195508	0	0.0200195	0.00195312	0.00125	0.0162001	0.0347418	0.00320312	0.0327626	0	0.0112847	0.0139605	0.0676427	0.00695312	0.0212695	0.00695312	0.0963812	0.000800781	0.0204883	0.03125	0.0706983	0.0498302	0.0898498	0.0225347	0.0854552	0.0498302	0.0823498	0.01125	0.0713428	0.0201128	0.0159918
0.0159918	0.00485726	0.00753472	0.0195508	0.0317795	0.00620009	0.0210959	0.00135634	0.018457	0.0867978	0.067717	0.0334722	0.0182639	0.0786728	0.00651259	0.0222938	0.0140126	0.00651259	0.0170139	0.0194293	0.0112847	0.00510634	0.0210503	0.0100347	0.00604384	0.0120508	0.0198003	0.0201063	0.0112847	0	0.0182834	0.0533025	0.032717	0.010523	0.00542535	0.0798187	0.0159918	0.0178668	0.0300347	0.0672608	0.053615	0.0691032	0.0282639	0.068615	0.053615	0.0616032	0.0150347	0.0586866	0.0592795	0.00968967
0.0157378	0.00925179	0.00692925	0.0257639	0.0102626	0.01125	0.00695312	0.0122656	0.00375868	0.0694736	0.0244813	0.0178668	0.00205078	0.0730674	0.0165625	0.0190625	0.0182031	0.0165625	0.00580078	0.0100347	0.0139605	0.0357639	0.0178668	0.0077105	0.00695312	0.0182639	0.0116168	0.0160156	0.0139605	0.0182834	0	0.047697	0.0162001	0.0228472	0.0039605	0.0786576	0.0157378	0.00347222	0.0077105	0.049381	0.0412907	0.0614275	0.00205078	0.0580095	0.0412907	0.0539275	0.0027105	0.0545959	0.0354883	0.013125
0.0735998	0.0462153	0.0426427	0.0441032	0.0727209	0.0547803	0.0655095	0.0511866	0.0575928	0.0115972	0.0949084	0.0448302	0.0564275	0.00472222	0.0638428	0.0408741	0.0725928	0.0638428	0.0626775	0.0470373	0.0676427	0.064381	0.0774084	0.0588927	0.0421241	0.0416032	0.0686584	0.0424366	0.0676427	0.0533025	0.047697	0	0.0824084	0.053131	0.0467834	0.00434028	0.0735998	0.0442248	0.0488927	0.00993055	0.0103125	0.00455078	0.0489275	0.0040625	0.0103125	0.00205078	0.0488927	0.00385634	0.112443	0.0528532
0.00580078	0.0289632	0.0341406	0.0656272	0.0015625	0.0157834	0.00229384	0.0226584	0.0077105	0.0924662	0.0190625	0.0675781	0.00782118	0.107779	0.0135959	0.0653147	0.00937717	0.0135959	0.00407118	0.028457	0.00695312	0.0467383	0.005	0.00820312	0.0323459	0.0581272	0.00625	0.0489084	0.00695312	0.032717	0.0162001	0.0824084	0	0.0379883	0.0178125	0.11448	0.00580078	0.0293945	0.0382031	0.0809848	0.0567834	0.106569	0.0228212	0.100221	0.0567834	0.0990685	0.0182031	0.0874887	0.00868056	0.0260438
0.0300781	0.0109358	0.0167383	0.0134722	0.0339258	0.0111806	0.0276128	0.00750868	0.0271962	0.0936577	0.0768945	0.0395508	0.0269293	0.0847514	0.0146181	0.0233681	0.0271962	0.0146181	0.0256793	0.0128125	0.0212695	0.0075	0.0329883	0.0200195	0.0153212	0.0184722	0.0317383	0.0137587	0.0212695	0.010523	0.0228472	0.053131	0.0379883	0	0.013457	0.0787444	0.0300781	0.026875	0.0400195	0.0763428	0.0635998	0.0585802	0.0306793	0.0590685	0.0635998	0.0635802	0.0250195	0.0523389	0.0738043	0.00722222
0.00970703	0.00333817	0.00351562	0.0194293	0.014375	0.00354384	0.00786675	0.00260634	0.00495009	0.0724662	0.0375	0.0219531	0.00448785	0.0721537	0.00635634	0.0174501	0.00995009	0.00635634	0.00573785	0.00955078	0.00695312	0.017207	0.0128125	0.00320312	0.00229384	0.0119293	0.0090625	0.0138563	0.00695312	0.00542535	0.0039605	0.0467834	0.0178125	0.013457	0	0.0755218	0.00970703	0.00548828	0.0132031	0.0526514	0.0417834	0.0620373	0.00948785	0.0595959	0.0417834	0.0545373	0.00320312	0.0524366	0.0387847	0.00817925
0.102963	0.0749537	0.0720062	0.0674945	0.104168	0.0811576	0.0964701	0.0781889	0.0874424	0.00961806	0.12698	0.0735687	0.0880131	0.00336806	0.0908452	0.0672514	0.10022	0.0908452	0.0942631	0.0726507	0.0963812	0.0879111	0.106147	0.0876312	0.0697514	0.0674945	0.0973968	0.0669389	0.0963812	0.0798187	0.0786576	0.00434028	0.11448	0.0787444	0.0755218	0	0.102963	0.0729632	0.0776312	0.0137847	0.0159028	0.00701606	0.0792631	0.00652778	0.0159028	0.00701606	0.0776312	0.0052105	0.144029	0.0831889
0	0.0189046	0.023457	0.0510503	0.00798828	0.00657118	0.00378472	0.0108681	0.00586806	0.0869389	0.0287695	0.0575195	0.0077105	0.0977202	0.00375868	0.0521962	0.000868056	0.00375868	0.0039605	0.0244531	0.000800781	0.0275781	0.000800781	0.00205078	0.0199306	0.0410503	0.00205078	0.0396181	0.000800781	0.0159918	0.0157378	0.0735998	0.00580078	0.0300781	0.00970703	0.102963	0	0.0222656	0.0320508	0.0721241	0.050631	0.0986584	0.0239605	0.0932873	0.050631	0.0886584	0.0120508	0.0781983	0.0144293	0.0223003
0.0222656	0.0107796	0.00595703	0.0178472	0.020957	0.0130556	0.0154253	0.0140712	0.00750868	0.0660014	0.0301758	0.00939453	0.008023	0.0695952	0.0208681	0.0108681	0.0225087	0.0208681	0.014273	0.0090625	0.0204883	0.035625	0.0243945	0.0117383	0.00375868	0.0103472	0.0156445	0.0103212	0.0204883	0.0178668	0.00347222	0.0442248	0.0293945	0.026875	0.00548828	0.0729632	0.0222656	0	0.00173828	0.0411866	0.0403185	0.0554552	0.003023	0.0520373	0.0403185	0.0479552	0.00173828	0.0489014	0.0464605	0.0215972
0.0320508	0.0204475	0.013125	0.0234918	0.0272656	0.0222938	0.0227105	0.0252626	0.0122938	0.0667631	0.0275781	0.0090625	0.0137847	0.0742631	0.0326063	0.0140126	0.0322938	0.0326063	0.0225347	0.0133008	0.03125	0.0512695	0.0332031	0.02	0.00995009	0.0159918	0.0219531	0.0140126	0.03125	0.0300347	0.0077105	0.0488927	0.0382031	0.0400195	0.0132031	0.0776312	0.0320508	0.00173828	0	0.0394483	0.0435802	0.0585998	0.00378472	0.0542052	0.0435802	0.0510998	0.005	0.0525928	0.0513628	0.0347418
0.0721241	0.0598958	0.0531983	0.0575928	0.0694223	0.059381	0.064381	0.0629748	0.0528532	0.00527778	0.0703598	0.0485108	0.0560802	0.0134028	0.0703185	0.0510998	0.070631	0.0703185	0.0648302	0.0496241	0.0706983	0.0855095	0.0726514	0.0594483	0.0482873	0.0525928	0.0614014	0.0492248	0.0706983	0.0672608	0.049381	0.00993055	0.0809848	0.0763428	0.0526514	0.0137847	0.0721241	0.0411866	0.0394483	0	0.00586806	0.0177626	0.0448302	0.0133681	0.00586806	0.0127626	0.0444483	0.0106445	0.0936584	0.0757873
0.050631	0.0490278	0.0467052	0.062072	0.0508459	0.0458741	0.0462907	0.0488428	0.0408741	0.00503472	0.0611584	0.0576427	0.042365	0.0125347	0.0511866	0.0575928	0.0508741	0.0511866	0.046115	0.046881	0.0498302	0.0698498	0.0517834	0.0435802	0.0435303	0.054572	0.0455334	0.0525928	0.0498302	0.053615	0.0412907	0.0103125	0.0567834	0.0635998	0.0417834	0.0159028	0.050631	0.0403185	0.0435802	0.00586806	0	0.0250195	0.042365	0.020625	0	0.0175195	0.0385802	0.0140126	0.0699431	0.058322
0.0986584	0.0595161	0.0553185	0.0420525	0.092506	0.0697608	0.0861931	0.0660889	0.0757764	0.0219293	0.115475	0.048131	0.0755095	0.013023	0.0831983	0.0419483	0.0957764	0.0831983	0.0842595	0.0513927	0.0898498	0.0760802	0.101569	0.0785998	0.0539014	0.0470525	0.0903185	0.0423389	0.0898498	0.0691032	0.0614275	0.00455078	0.106569	0.0585802	0.0620373	0.00701606	0.0986584	0.0554552	0.0585998	0.0177626	0.0250195	0	0.0592595	0.000488281	0.0250195	0.005	0.0635998	0.00375868	0.142385	0.0658025
0.0239605	0.0167323	0.0125347	0.0260959	0.0137587	0.0170508	0.0120508	0.0206445	0.00635634	0.0674228	0.0196962	0.0153472	0.00625	0.0755478	0.0254883	0.0187695	0.0258008	0.0254883	0.0125	0.0089605	0.0225347	0.0473459	0.0244878	0.0137847	0.010957	0.0210959	0.0157378	0.0143945	0.0225347	0.0282639	0.00205078	0.0489275	0.0228212	0.0306793	0.00948785	0.0792631	0.0239605	0.003023	0.00378472	0.0448302	0.042365	0.0592595	0	0.054865	0.042365	0.0542595	0.00378472	0.0529748	0.0388281	0.023457
0.0932873	0.0590278	0.0548302	0.0425407	0.0861584	0.0663428	0.080822	0.0646241	0.0704053	0.0175347	0.105221	0.0476427	0.071115	0.0125347	0.0797803	0.0424366	0.0904053	0.0797803	0.079865	0.0479748	0.0854552	0.0765685	0.0952209	0.0742052	0.0524366	0.0475407	0.0839709	0.0408741	0.0854552	0.068615	0.0580095	0.0040625	0.100221	0.0590685	0.0595959	0.00652778	0.0932873	0.0520373	0.0542052	0.0133681	0.020625	0.000488281	0.054865	0	0.020625	0.00548828	0.0592052	0.00229384	0.132131	0.0662908
0.050631	0.0490278	0.0467052	0.062072	0.0508459	0.0458741	0.0462907	0.0488428	0.0408741	0.00503472	0.0611584	0.0576427	0.042365	0.0125347	0.0511866	0.0575928	0.0508741	0.0511866	0.046115	0.046881	0.0498302	0.0698498	0.0517834	0.0435802	0.0435303	0.054572	0.0455334	0.0525928	0.0498302	0.053615	0.0412907	0.0103125	0.0567834	0.0635998	0.0417834	0.0159028	0.050631	0.0403185	0.0435802	0.00586806	0	0.0250195	0.042365	0.020625	0	0.0175195	0.0385802	0.0140126	0.0699431	0.058322
0.0886584	0.0520161	0.0453185	0.0470525	0.087506	0.0672608	0.0786931	0.0610889	0.0682764	0.0169293	0.107975	0.040631	0.0655095	0.005523	0.0781983	0.0394483	0.0882764	0.0781983	0.0742595	0.0563927	0.0823498	0.0760802	0.0940685	0.0710998	0.0464014	0.0420525	0.0828185	0.0473389	0.0823498	0.0616032	0.0539275	0.00205078	0.0990685	0.0635802	0.0545373	0.00701606	0.0886584	0.0479552	0.0510998	0.0127626	0.0175195	0.005	0.0542595	0.00548828	0.0175195	0	0.0560998	0.00875868	0.132385	0.0608025
0.0120508	0.0104475	0.008125	0.0234918	0.0122656	0.00729384	0.0077105	0.0102626	0.00229384	0.0667631	0.0225781	0.0190625	0.00378472	0.0742631	0.0126063	0.0190126	0.0122938	0.0126063	0.00753472	0.00830078	0.01125	0.0312695	0.0132031	0.005	0.00495009	0.0159918	0.00695312	0.0140126	0.01125	0.0150347	0.0027105	0.0488927	0.0182031	0.0250195	0.00320312	0.0776312	0.0120508	0.00173828	0.005	0.0444483	0.0385802	0.0635998	0.00378472	0.0592052	0.0385802	0.0560998	0	0.0525928	0.0313628	0.0197418
0.0781983	0.0538216	0.0521241	0.0410889	0.0759262	0.0545959	0.0704552	0.0548302	0.0614275	0.0134223	0.0960824	0.0524366	0.0642248	0.0123286	0.0655334	0.0445959	0.0742052	0.0655334	0.0704748	0.0423389	0.0713428	0.0640056	0.0791553	0.0625928	0.0476427	0.0460889	0.0704053	0.0385802	0.0713428	0.0586866	0.0545959	0.00385634	0.0874887	0.0523389	0.0524366	0.0052105	0.0781983	0.0489014	0.0525928	0.0106445	0.0140126	0.00375868	0.0529748	0.00229384	0.0140126	0.00875868	0.0525928	0	0.114381	0.0617834
0.0144293	0.0577479	0.0623003	0.0992209	0.0108681	0.0329883	0.0137695	0.0470508	0.0180751	0.106251	0.0121181	0.0963628	0.0225781	0.136563	0.0301758	0.0981445	0.0175195	0.0301758	0.0188281	0.048648	0.0201128	0.0779709	0.0103472	0.0213628	0.0561133	0.0892209	0.0115972	0.0758008	0.0201128	0.0592795	0.0354883	0.112443	0.00868056	0.0738043	0.0387847	0.144029	0.0144293	0.0464605	0.0513628	0.0936584	0.0699431	0.142385	0.0388281	0.132131	0.0699431	0.132385	0.0313628	0.114381	0	0.061582
0.0223003	0.00565805	0.0089605	0.0251389	0.0244813	0.013125	0.0178906	0.00695312	0.0196962	0.0908799	0.0649501	0.034273	0.014707	0.0794736	0.0140625	0.0253125	0.0241406	0.0140625	0.013457	0.0200347	0.0159918	0.0163889	0.0277105	0.0147418	0.0122656	0.0201389	0.0264605	0.0232031	0.0159918	0.00968967	0.013125	0.0528532	0.0260438	0.00722222	0.00817925	0.0831889	0.0223003	0.0215972	0.0347418	0.0757873	0.058322	0.0658025	0.023457	0.0662908	0.058322	0.0608025	0.0197418	0.0617834	0.061582	0
0.000800781	0.0239632	0.0291406	0.0539605	0.0065625	0.00745009	0.0039605	0.0143251	0.00604384	0.0874662	0.0240625	0.0625781	0.00948785	0.102779	0.00526259	0.0569813	0.00104384	0.00526259	0.00573785	0.023457	0.00195312	0.0317383	0	0.00320312	0.0240126	0.0464605	0.00125	0.0405751	0.00195312	0.0210503	0.0178668	0.0774084	0.005	0.0329883	0.0128125	0.106147	0.000800781	0.0243945	0.0332031	0.0726514	0.0517834	0.101569	0.0244878	0.0952209	0.0517834	0.0940685	0.0132031	0.0791553	0.0103472	0.0277105
0.00205078	0.0104475	0.013125	0.0334918	0.00726563	0.00229384	0.0027105	0.00526259	0.00229384	0.0767631	0.0275781	0.0390625	0.00378472	0.0842631	0.00260634	0.0340126	0.00229384	0.00260634	0.00253472	0.0133008	0.00125	0.0212695	0.00320312	0	0.00995009	0.0259918	0.00195312	0.0240126	0.00125	0.0100347	0.0077105	0.0588927	0.00820312	0.0200195	0.00320312	0.0876312	0.00205078	0.0117383	0.02	0.0594483	0.0435802	0.0785998	0.0137847	0.0742052	0.0435802	0.0710998	0.005	0.0625928	0.0213628	0.0147418
0.0108008	0.0239632	0.0241406	0.0506272	0.0015625	0.0157834	0.00229384	0.0226584	0.0027105	0.0774662	0.0090625	0.0425781	0.00282118	0.0927787	0.0185959	0.0453147	0.0143772	0.0185959	0.00407118	0.018457	0.0119531	0.0517383	0.01	0.00820312	0.0223459	0.0431272	0.00625	0.0339084	0.0119531	0.032717	0.00620009	0.0674084	0.005	0.0379883	0.0128125	0.0994801	0.0108008	0.0143945	0.0182031	0.0609848	0.0467834	0.0865685	0.00782118	0.0802209	0.0467834	0.0790685	0.00820312	0.0724887	0.0136806	0.0260438
0.0760303	0.0540365	0.0473389	0.0497803	0.0752816	0.059381	0.0682873	0.0590685	0.0567595	0.0072309	0.0840316	0.0426514	0.0580334	0.0075434	0.0703185	0.0432873	0.0745373	0.0703185	0.0667834	0.0496241	0.0726514	0.077697	0.0785108	0.0614014	0.044381	0.0447803	0.0672608	0.0453185	0.0726514	0.0614014	0.049381	0.00407118	0.0868441	0.0685303	0.0506983	0.00792535	0.0760303	0.0411866	0.0414014	0.00195312	0.00782118	0.00995009	0.0467834	0.00750868	0.00782118	0.00495009	0.0464014	0.00673828	0.10733	0.0679748
0.00351562	0.00702957	0.00970703	0.0290972	0.00970703	0.00180556	0.00417535	0.00282118	0.00375868	0.0772514	0.0339258	0.0356445	0.004273	0.0808451	0.00211806	0.0296181	0.00375868	0.00211806	0.003023	0.0128125	0.00173828	0.016875	0.00564453	0.000488281	0.00750868	0.0215972	0.00439453	0.0215712	0.00173828	0.00661675	0.00722222	0.0554748	0.0106445	0.015625	0.00173828	0.0842132	0.00351562	0.01125	0.0204883	0.0599366	0.0440685	0.0742052	0.014273	0.0707873	0.0440685	0.0667052	0.00548828	0.0601514	0.0277105	0.0103472
0.0392757	0.00548828	0.00343582	0.0114198	0.0418733	0.0222531	0.0324354	0.0154562	0.0245187	0.0791052	0.0667171	0.00687332	0.0211268	0.0670739	0.0300656	0.0044406	0.0395187	0.0300656	0.0273768	0.01826	0.0335921	0.0291975	0.0453108	0.0248421	0.00514372	0.00391976	0.0365608	0.0117062	0.0335921	0.0153455	0.0126698	0.0417036	0.0503108	0.0204475	0.0107796	0.070442	0.0392757	0.00919754	0.0148421	0.0542904	0.0534223	0.0490278	0.0161268	0.0495161	0.0534223	0.0415278	0.0148421	0.0502865	0.0830018	0.0151698
0.0027105	0.0264979	0.0310503	0.0640647	0.00305556	0.013457	0.00205078	0.019707	0.00635634	0.090626	0.0199306	0.0651128	0.00695312	0.105313	0.0106445	0.0629883	0.00580078	0.0106445	0.00320312	0.0291168	0.00448785	0.0428147	0.00253472	0.00573785	0.0287695	0.0540647	0.00378472	0.048457	0.00448785	0.0280295	0.015957	0.0811931	0.000868056	0.038648	0.0153472	0.112779	0.0027105	0.0269293	0.0357378	0.0780334	0.0543181	0.107228	0.0232031	0.100881	0.0543181	0.0972283	0.0157378	0.0870373	0.0078125	0.0264258
0.058131	0.0540278	0.0542052	0.054572	0.0533459	0.0458741	0.0512907	0.0513428	0.0458741	0.00753472	0.0661584	0.0626427	0.049865	0.0175347	0.0536866	0.0575928	0.0558741	0.0536866	0.053615	0.039381	0.0548302	0.0673498	0.0567834	0.0485802	0.0485303	0.057072	0.0505334	0.0450928	0.0548302	0.058615	0.0462907	0.0103125	0.0617834	0.0560998	0.0467834	0.0134028	0.058131	0.0453185	0.0485802	0.00836806	0.005	0.0175195	0.044865	0.013125	0.005	0.0200195	0.0435802	0.00651259	0.0774431	0.060822
0.0053125	0.0235921	0.0287695	0.0592795	0.00205078	0.013342	0.00180556	0.0182639	0.00722222	0.0910014	0.023457	0.062207	0.00635634	0.102408	0.0111545	0.058967	0.00888889	0.0111545	0.00260634	0.0260156	0.00548828	0.0403906	0.00548828	0.00673828	0.0279514	0.0517795	0.00673828	0.0445139	0.00548828	0.0273459	0.0137587	0.0770373	0.000488281	0.0316406	0.0143945	0.109109	0.0053125	0.0269531	0.0367383	0.0795199	0.0553185	0.100221	0.0213563	0.0948498	0.0553185	0.0927209	0.0167383	0.0830941	0.0130751	0.0196962
0.0403906	0.00812332	0.00455078	0.00503472	0.0404883	0.0196181	0.0323003	0.0140712	0.0243837	0.0777202	0.066582	0.00673828	0.0222418	0.0669389	0.0286806	0.00180556	0.0393837	0.0286806	0.0284918	0.011875	0.033457	0.0253125	0.0451758	0.024707	0.00500868	0.00253472	0.0364258	0.00532118	0.033457	0.0152105	0.0125347	0.0390685	0.0501758	0.0140625	0.0106445	0.066557	0.0403906	0.0090625	0.014707	0.0529053	0.0532873	0.0426427	0.0147418	0.043131	0.0532873	0.0401427	0.014707	0.0439014	0.0841167	0.0137847
0.0053125	0.0135921	0.0137695	0.0326128	0.00705078	0.00500868	0.00347222	0.00993055	0.000555556	0.0710014	0.018457	0.032207	0.003023	0.0824077	0.00782118	0.0306337	0.00555556	0.00782118	0.004273	0.0110156	0.00548828	0.0303906	0.00548828	0.00173828	0.00961806	0.0251128	0.00173828	0.0211806	0.00548828	0.0156793	0.00542535	0.0570373	0.0104883	0.0266406	0.00439453	0.0857757	0.0053125	0.00695312	0.0117383	0.0511866	0.0403185	0.0752209	0.008023	0.0698498	0.0403185	0.0677209	0.00173828	0.0597608	0.0197418	0.0213628
0.0885014	0.0806482	0.0770756	0.0824424	0.0837162	0.0774944	0.0804111	0.0817132	0.0724945	0.0003125	0.0902787	0.0792631	0.0752353	0.0090625	0.086557	0.0792132	0.0874945	0.086557	0.0814853	0.0697514	0.0864506	0.10272	0.0884037	0.0777006	0.0726507	0.0799424	0.0796537	0.0729632	0.0864506	0.0877353	0.0704111	0.0112847	0.0934037	0.0914701	0.0734037	0.00868056	0.0885014	0.0669389	0.0677006	0.00559028	0.00597222	0.0197418	0.0677353	0.0153472	0.00597222	0.0172418	0.0677006	0.0112348	0.107813	0.0911924
0.00587289	0.0116168	0.0195643	0.0458989	0.00789763	0.00888504	0.00458817	0.00990067	0.00889372	0.0896087	0.0371164	0.0530018	0.00718582	0.0932024	0.00669754	0.0466975	0.00833817	0.00669754	0.00343582	0.0226698	0.00409555	0.0258989	0.0080018	0.00534555	0.0195882	0.0383989	0.00925179	0.0361507	0.00409555	0.0159185	0.012635	0.067832	0.00633513	0.0204823	0.00909554	0.0987927	0.00587289	0.0236073	0.0353455	0.0770161	0.0539258	0.0890625	0.0221858	0.0856445	0.0539258	0.0815625	0.0153455	0.0747309	0.0256233	0.01076
0.0157101	0.00180556	0.0072531	0.0214914	0.0281646	0.00702957	0.0185921	0.00218582	0.0170643	0.0865162	0.0641021	0.0331906	0.01576	0.0783912	0.00734207	0.0231233	0.0148421	0.00734207	0.01451	0.0191476	0.0110031	0.00815804	0.0207687	0.0097531	0.00687332	0.0139914	0.0195187	0.0209358	0.0110031	0.0019406	0.0157796	0.0530208	0.0291021	0.0102414	0.00514372	0.0806482	0.0157101	0.0175851	0.0297531	0.0680903	0.0533333	0.0688216	0.02576	0.0683333	0.0533333	0.0613216	0.0147531	0.0595161	0.0567757	0.00718582
0.0125195	0.00638504	0.0115625	0.030523	0.0241406	0.00745009	0.0156793	0.00260634	0.0177626	0.0933256	0.0650781	0.045	0.0153472	0.0852006	0.00526259	0.0335438	0.0127626	0.00526259	0.0115972	0.023457	0.0078125	0.00830078	0.0175781	0.0090625	0.0122938	0.023023	0.0188281	0.0288563	0.0078125	0.00347222	0.0178668	0.0598302	0.0225781	0.00955078	0.00695312	0.0885687	0.0125195	0.0243945	0.0390625	0.0785108	0.0576427	0.078131	0.0303472	0.0776427	0.0576427	0.070631	0.0190625	0.0674366	0.0513628	0.004273
0.0192757	0.00548828	0.0134358	0.0314198	0.0318733	0.0122531	0.0224354	0.00545622	0.0245187	0.0991052	0.0767171	0.0468733	0.0211268	0.0870739	0.0100656	0.0344406	0.0195187	0.0100656	0.0173768	0.02826	0.0135921	0.00919754	0.0253108	0.0148421	0.0151437	0.0239198	0.0265608	0.0317062	0.0135921	0.00534555	0.0226698	0.0617036	0.0303108	0.0104475	0.0107796	0.090442	0.0192757	0.0291975	0.0448421	0.0842904	0.0634223	0.0790278	0.0361268	0.0795161	0.0634223	0.0715278	0.0248421	0.0702865	0.0630018	0.00516976
0.0137695	0.00263504	0.0053125	0.021773	0.0228906	0.00620009	0.0144293	0.00135634	0.0140126	0.0845756	0.0588281	0.03125	0.0115972	0.0764506	0.00651259	0.0222938	0.0140126	0.00651259	0.0103472	0.017207	0.0090625	0.00955078	0.0188281	0.0078125	0.00604384	0.014273	0.0175781	0.0201063	0.0090625	0.00222222	0.0116168	0.0510802	0.0238281	0.00830078	0.00320312	0.0798187	0.0137695	0.0156445	0.0278125	0.0672608	0.0513927	0.066881	0.0215972	0.0663927	0.0513927	0.059381	0.0128125	0.0586866	0.0526128	0.003023
0.0206337	0.00399138	0.00729384	0.0168056	0.0328147	0.008125	0.0228906	0.00195312	0.0213628	0.0892132	0.0732834	0.0326063	0.019707	0.0778069	0.0090625	0.0203125	0.0191406	0.0090625	0.018457	0.0183681	0.0143251	0.00472222	0.0260438	0.0130751	0.00726563	0.0118056	0.0247938	0.0182031	0.0143251	0.00135634	0.018125	0.0511866	0.0343772	0.00555556	0.00651259	0.0781889	0.0206337	0.0199306	0.0330751	0.0707873	0.0566553	0.0641358	0.028457	0.0646241	0.0566553	0.0591358	0.0180751	0.0567834	0.066582	0.005
0.0335156	0.0170296	0.00970703	0.0190972	0.029707	0.0218056	0.0241753	0.0228212	0.0137587	0.0672514	0.0339258	0.00564453	0.014273	0.0708451	0.0321181	0.00961806	0.0337587	0.0321181	0.023023	0.0128125	0.0317383	0.046875	0.0356445	0.0204883	0.00750868	0.0115972	0.0243945	0.0115712	0.0317383	0.0266168	0.00722222	0.0454748	0.0406445	0.035625	0.0117383	0.0742132	0.0335156	0.00125	0.000488281	0.0399366	0.0440685	0.0542052	0.004273	0.0507873	0.0440685	0.0467052	0.00548828	0.0501514	0.0577105	0.0303472
0.044707	0.0129475	0.00625	0.0089605	0.0425781	0.0252626	0.0347418	0.0210438	0.0243251	0.0742631	0.0591406	0.0015625	0.0225347	0.0667631	0.0362001	0.00135634	0.0443251	0.0362001	0.0312847	0.0143945	0.039375	0.0379883	0.0491406	0.028125	0.00635634	0.0039605	0.0378906	0.00729384	0.039375	0.0225347	0.0119293	0.0401427	0.0541406	0.0254883	0.0135156	0.0682562	0.044707	0.00595703	0.008125	0.0469483	0.0517052	0.0440685	0.0112847	0.0435802	0.0517052	0.0390685	0.013125	0.0458741	0.0835503	0.0227105
0.00573785	0.00925179	0.0119293	0.0357639	0.00526259	0.00625	0.00195312	0.00726563	0.00375868	0.0794736	0.0294813	0.0378668	0.00205078	0.0830674	0.0065625	0.0340625	0.00820312	0.0065625	0.000800781	0.0150347	0.0039605	0.0257639	0.00786675	0.0027105	0.0119531	0.0282639	0.00661675	0.0260156	0.0039605	0.0132834	0.005	0.057697	0.00620009	0.0178472	0.0039605	0.0886576	0.00573785	0.0134722	0.0227105	0.064381	0.0462907	0.0764275	0.0120508	0.0730095	0.0462907	0.0689275	0.0077105	0.0645959	0.0254883	0.008125
0.0150087	0.0153976	0.0212001	0.0196181	0.0182834	0.0028125	0.0147656	0.00695312	0.0132378	0.0824945	0.0456272	0.0440126	0.0179883	0.0892132	0.00625	0.030625	0.0110156	0.00625	0.0167383	0.00555556	0.0101063	0.0125347	0.0140126	0.00885634	0.0147656	0.0246181	0.0127626	0.0132031	0.0101063	0.0127626	0.0178125	0.0575928	0.0223459	0.00836806	0.0101063	0.0820951	0.0150087	0.0196181	0.0288563	0.0640685	0.0524366	0.0669483	0.0217383	0.0635303	0.0524366	0.0719483	0.0138563	0.0517834	0.0414258	0.0178125
0.000800781	0.0239632	0.0291406	0.0539605	0.0065625	0.00745009	0.0039605	0.0143251	0.00604384	0.0874662	0.0240625	0.0625781	0.00948785	0.102779	0.00526259	0.0569813	0.00104384	0.00526259	0.00573785	0.023457	0.00195312	0.0317383	0	0.00320312	0.0240126	0.0464605	0.00125	0.0405751	0.00195312	0.0210503	0.0178668	0.0774084	0.005	0.0329883	0.0128125	0.106147	0.000800781	0.0243945	0.0332031	0.0726514	0.0517834	0.101569	0.0244878	0.0952209	0.0517834	0.0940685	0.0132031	0.0791553	0.0103472	0.0277105
0.0552132	0.0183008	0.0193733	0.0019406	0.0615608	0.0254823	0.0519146	0.0218104	0.0406646	0.0887927	0.0895296	0.0196858	0.043731	0.0798864	0.0364198	0.00766976	0.0489979	0.0364198	0.049981	0.0154475	0.0464046	0.022635	0.0581233	0.0376546	0.0146229	0.0069406	0.0493733	0.00556039	0.0464046	0.0214914	0.0321489	0.0482661	0.0731233	0.017635	0.0235921	0.0705462	0.0552132	0.02201	0.0276546	0.0606445	0.0662348	0.0462153	0.032481	0.0467036	0.0662348	0.0512153	0.0276546	0.0441406	0.105606	0.0315239
0.00125	0.0189046	0.024707	0.0448003	0.00673828	0.00407118	0.00378472	0.00961806	0.00586806	0.0856889	0.0287695	0.0575195	0.0089605	0.0977202	0.00250868	0.0496962	0.000868056	0.00250868	0.0052105	0.0182031	0.000800781	0.0238281	0.000800781	0.00205078	0.0199306	0.0398003	0.00205078	0.0333681	0.000800781	0.0159918	0.0157378	0.0710998	0.00580078	0.0238281	0.00970703	0.0992132	0.00125	0.0222656	0.0320508	0.0708741	0.050631	0.0924084	0.0227105	0.0870373	0.050631	0.0874084	0.0120508	0.0719483	0.0156793	0.0210503
0.0216213	0.00497903	0.00828149	0.0200154	0.030469	0.0102238	0.0216561	0.00405189	0.0212394	0.0701391	0.0709377	0.033594	0.0184725	0.0587329	0.0111613	0.0224113	0.0212394	0.0111613	0.0172225	0.0193557	0.0153127	0.00904321	0.0270315	0.0140627	0.00936439	0.0150154	0.0257815	0.0203019	0.0153127	0.00456621	0.0168904	0.0367421	0.0320315	0.00654321	0.00750024	0.0602259	0.0216213	0.0209182	0.0340627	0.0574539	0.0422109	0.0496914	0.0272225	0.0501796	0.0422109	0.0446914	0.0190627	0.04345	0.0653475	0.00376543
0.0052105	0.0129823	0.0162847	0.0373459	0.00250868	0.00580078	0.000800781	0.00939453	0.00260634	0.0786728	0.0234462	0.0415972	0.0025	0.0867978	0.00673828	0.0375195	0.00705078	0.00673828	0.00125	0.0127105	0.00378472	0.0285959	0.00573785	0.00253472	0.014707	0.0323459	0.00448785	0.0256445	0.00378472	0.0170139	0.00580078	0.0601775	0.00407118	0.0194293	0.00573785	0.0905131	0.0052105	0.014273	0.0225347	0.0635802	0.046115	0.0780095	0.01125	0.073615	0.046115	0.0730095	0.00753472	0.0642248	0.0200781	0.012207
0.0530334	0.0459223	0.0442248	0.054865	0.0529748	0.0444483	0.0480681	0.0460889	0.0426514	0.0052105	0.0678185	0.0545373	0.0437907	0.00942925	0.0503858	0.0522608	0.0526514	0.0503858	0.0475407	0.0435802	0.050631	0.0638927	0.0545373	0.044381	0.0414014	0.049865	0.0482873	0.0473389	0.050631	0.0505095	0.041115	0.00595703	0.0595373	0.0563927	0.040631	0.0109223	0.0530334	0.0401427	0.044381	0.00604384	0.000800781	0.0178125	0.0425407	0.0143945	0.000800781	0.0128125	0.039381	0.00875868	0.0772282	0.053615
0.00580078	0.0289632	0.0341406	0.0656272	0.0015625	0.0157834	0.00229384	0.0226584	0.0077105	0.0924662	0.0190625	0.0675781	0.00782118	0.107779	0.0135959	0.0653147	0.00937717	0.0135959	0.00407118	0.028457	0.00695312	0.0467383	0.005	0.00820312	0.0323459	0.0581272	0.00625	0.0489084	0.00695312	0.032717	0.0162001	0.0824084	0	0.0379883	0.0178125	0.11448	0.00580078	0.0293945	0.0382031	0.0809848	0.0567834	0.106569	0.0228212	0.100221	0.0567834	0.0990685	0.0182031	0.0874887	0.00868056	0.0260438
0.0306838	0.00466653	0.00234399	0.0128279	0.0357815	0.0161613	0.0263436	0.00936439	0.0209269	0.0604516	0.0656252	0.0132815	0.017535	0.0484204	0.0214738	0.00834877	0.0309269	0.0214738	0.021285	0.0171682	0.0250002	0.0206057	0.036719	0.0187502	0.00405189	0.00532793	0.030469	0.0131144	0.0250002	0.00925371	0.0115779	0.0276796	0.041719	0.0143557	0.00718774	0.0517884	0.0306838	0.0106057	0.0187502	0.0427664	0.0368984	0.0375039	0.017535	0.0379921	0.0368984	0.0300039	0.0137502	0.0362625	0.07441	0.00907793
0.0137695	0.00263504	0.0053125	0.021773	0.0228906	0.00620009	0.0144293	0.00135634	0.0140126	0.0845756	0.0588281	0.03125	0.0115972	0.0764506	0.00651259	0.0222938	0.0140126	0.00651259	0.0103472	0.017207	0.0090625	0.00955078	0.0188281	0.0078125	0.00604384	0.014273	0.0175781	0.0201063	0.0090625	0.00222222	0.0116168	0.0510802	0.0238281	0.00830078	0.00320312	0.0798187	0.0137695	0.0156445	0.0278125	0.0672608	0.0513927	0.066881	0.0215972	0.0663927	0.0513927	0.059381	0.0128125	0.0586866	0.0526128	0.003023
0.0325195	0.00638504	0.0015625	0.010523	0.0341406	0.0174501	0.0256793	0.0126063	0.0177626	0.0733256	0.0550781	0.005	0.0153472	0.0652006	0.0252626	0.00354384	0.0327626	0.0252626	0.0215972	0.013457	0.0278125	0.0283008	0.0375781	0.0190625	0.00229384	0.003023	0.0288281	0.00885634	0.0278125	0.0134722	0.00786675	0.0398302	0.0425781	0.0195508	0.00695312	0.0685687	0.0325195	0.00439453	0.0090625	0.0485108	0.0476427	0.048131	0.0103472	0.0476427	0.0476427	0.040631	0.0090625	0.0474366	0.0713628	0.014273
0.0135156	0.00702957	0.00470703	0.0190972	0.014707	0.00680556	0.00917535	0.00782118	0.00375868	0.0672514	0.0289258	0.0156445	0.004273	0.0708451	0.0121181	0.0146181	0.0137587	0.0121181	0.008023	0.0078125	0.0117383	0.026875	0.0156445	0.00548828	0.00250868	0.0115972	0.00939453	0.0115712	0.0117383	0.0116168	0.00222222	0.0454748	0.0206445	0.020625	0.00173828	0.0742132	0.0135156	0.00125	0.00548828	0.0449366	0.0390685	0.0592052	0.004273	0.0557873	0.0390685	0.0517052	0.000488281	0.0501514	0.0377105	0.0153472
0.0296962	0.00367888	0.00135634	0.00961806	0.0381272	0.0140625	0.0275781	0.00726563	0.0210503	0.0795257	0.0679709	0.0122938	0.0187695	0.0674945	0.019375	0.00625	0.0288281	0.019375	0.0225195	0.0161806	0.0240126	0.0162847	0.0357313	0.0177626	0.00195312	0.00211806	0.0294813	0.0110156	0.0240126	0.00604384	0.0128125	0.0421241	0.0440647	0.0133681	0.00620009	0.0697514	0.0296962	0.00961806	0.0177626	0.0560998	0.0513428	0.0519483	0.0187695	0.0524366	0.0513428	0.0444483	0.0127626	0.0495959	0.0756445	0.0103125
0.0203125	0.0185921	0.0137695	0.0276128	0.0170508	0.0150087	0.0134722	0.0199306	0.00555556	0.0660014	0.018457	0.017207	0.008023	0.0774077	0.0228212	0.0206337	0.0205556	0.0228212	0.014273	0.0110156	0.0204883	0.0453906	0.0204883	0.0117383	0.00961806	0.0201128	0.0117383	0.0161806	0.0204883	0.0256793	0.00542535	0.0520373	0.0254883	0.0366406	0.00939453	0.0807757	0.0203125	0.00195312	0.00173828	0.0411866	0.0403185	0.0652209	0.003023	0.0598498	0.0403185	0.0577209	0.00173828	0.0547608	0.0347418	0.0313628
0.0800121	0.0488776	0.0415551	0.0480156	0.0791332	0.0624427	0.0706719	0.0575989	0.0602552	0.110818	0.0950707	0.0374926	0.0578398	0.102693	0.0727552	0.0385364	0.0802552	0.0727552	0.0665898	0.0534496	0.0753051	0.0757934	0.0850707	0.0640551	0.0422864	0.0405156	0.0738207	0.0463489	0.0753051	0.0584648	0.0478594	0.0773228	0.0900707	0.0645434	0.0494457	0.106061	0.0800121	0.0418871	0.0440551	0.0835034	0.0876354	0.0831236	0.0478398	0.0826354	0.0876354	0.0756236	0.0490551	0.0849292	0.118855	0.0592656
0.0201128	0.00909554	0.014273	0.0367014	0.0260438	0.0153125	0.0188281	0.00851562	0.0231337	0.0999424	0.0708876	0.0477105	0.0175195	0.0879111	0.013125	0.0375	0.0225781	0.013125	0.0137695	0.0290972	0.0144293	0.0167014	0.026148	0.0156793	0.0182031	0.0292014	0.027398	0.0347656	0.0144293	0.0106272	0.0190625	0.0625407	0.0244813	0.0112847	0.0116168	0.0935014	0.0201128	0.0300347	0.0456793	0.0873498	0.0642595	0.079865	0.0325195	0.0803532	0.0642595	0.072365	0.0256793	0.0733459	0.0593945	0.0015625
0.0488281	0.0146858	0.0129883	0.00222222	0.0451758	0.0224306	0.0388628	0.0187587	0.0309462	0.0824077	0.0731445	0.0133008	0.0306793	0.0735014	0.0333681	0.00461806	0.0459462	0.0333681	0.0369293	0.0090625	0.0400195	0.02625	0.0517383	0.0312695	0.0115712	0.00722222	0.0429883	0.00250868	0.0400195	0.021773	0.0190972	0.041881	0.0567383	0.01125	0.017207	0.0674945	0.0488281	0.015625	0.0212695	0.0575928	0.0598498	0.0398302	0.0194293	0.0403185	0.0598498	0.0448302	0.0212695	0.0410889	0.0925542	0.0184722
0.00226562	0.0107796	0.015957	0.0378472	0.010957	0.00305556	0.00542535	0.00407118	0.00750868	0.0860014	0.0401758	0.0493945	0.008023	0.0895952	0.000868056	0.0408681	0.00250868	0.000868056	0.004273	0.0190625	0.000488281	0.015625	0.00439453	0.00173828	0.0137587	0.0303472	0.00564453	0.0303212	0.000488281	0.00786675	0.0134722	0.0642248	0.00939453	0.016875	0.00548828	0.0929632	0.00226562	0.02	0.0317383	0.0711866	0.0503185	0.0854552	0.023023	0.0820373	0.0503185	0.0779552	0.0117383	0.0689014	0.0264605	0.0115972
0.0448421	0.0128125	0.013885	0.00409555	0.0402132	0.0203976	0.0348768	0.0186789	0.0269601	0.0793982	0.0642757	0.0141975	0.0276698	0.0743982	0.0313351	0.00649138	0.0419601	0.0313351	0.0339198	0.00702957	0.03701	0.0281233	0.0467757	0.02826	0.0114914	0.00909554	0.0380257	0.00242888	0.03701	0.0226698	0.0170643	0.0427778	0.0517757	0.0131233	0.0161507	0.0683912	0.0448421	0.0135921	0.01826	0.0545833	0.0568403	0.0417036	0.0164198	0.0412153	0.0568403	0.0467036	0.01826	0.0410091	0.0836854	0.0203455
0.0120508	0.0104475	0.008125	0.0234918	0.0122656	0.00729384	0.0077105	0.0102626	0.00229384	0.0667631	0.0225781	0.0190625	0.00378472	0.0742631	0.0126063	0.0190126	0.0122938	0.0126063	0.00753472	0.00830078	0.01125	0.0312695	0.0132031	0.005	0.00495009	0.0159918	0.00695312	0.0140126	0.01125	0.0150347	0.0027105	0.0488927	0.0182031	0.0250195	0.00320312	0.0776312	0.0120508	0.00173828	0.005	0.0444483	0.0385802	0.0635998	0.00378472	0.0592052	0.0385802	0.0560998	0	0.0525928	0.0313628	0.0197418
0.0254253	0.0133143	0.00911675	0.0128125	0.0295334	0.0121181	0.0224045	0.0137587	0.0122656	0.0679111	0.0393772	0.0119293	0.0156272	0.0721299	0.0205556	0.00993055	0.0228212	0.0205556	0.0218772	0.00847222	0.023023	0.0296181	0.0269293	0.014273	0.00407118	0.0078125	0.0181793	0.00750868	0.023023	0.015957	0.0104514	0.0455095	0.0385959	0.0262847	0.008023	0.0714007	0.0254253	0.00253472	0.004273	0.0408741	0.0428532	0.054865	0.00937717	0.051447	0.0428532	0.049865	0.004273	0.0460889	0.0540647	0.0279514
0.0217383	0.0242757	0.0200781	0.031148	0.01625	0.0165126	0.014273	0.0240126	0.00635634	0.0671537	0.014375	0.0228906	0.0104253	0.0830912	0.0249501	0.0260438	0.0213563	0.0249501	0.0166753	0.0106445	0.0222656	0.0501758	0.0203125	0.0135156	0.0143251	0.026148	0.0115625	0.0177626	0.0222656	0.0313628	0.00817925	0.0564709	0.0253125	0.0401758	0.013125	0.0845843	0.0217383	0.00470703	0.00351562	0.0423389	0.0420959	0.068756	0.00417535	0.0624084	0.0420959	0.063756	0.00351562	0.0563428	0.0312847	0.037398
0.0254253	0.0133143	0.00911675	0.0128125	0.0295334	0.0121181	0.0224045	0.0137587	0.0122656	0.0679111	0.0393772	0.0119293	0.0156272	0.0721299	0.0205556	0.00993055	0.0228212	0.0205556	0.0218772	0.00847222	0.023023	0.0296181	0.0269293	0.014273	0.00407118	0.0078125	0.0181793	0.00750868	0.023023	0.015957	0.0104514	0.0455095	0.0385959	0.0262847	0.008023	0.0714007	0.0254253	0.00253472	0.004273	0.0408741	0.0428532	0.054865	0.00937717	0.051447	0.0428532	0.049865	0.004273	0.0460889	0.0540647	0.0279514
0.0217383	0.0242757	0.0200781	0.031148	0.01625	0.0165126	0.014273	0.0240126	0.00635634	0.0671537	0.014375	0.0228906	0.0104253	0.0830912	0.0249501	0.0260438	0.0213563	0.0249501	0.0166753	0.0106445	0.0222656	0.0501758	0.0203125	0.0135156	0.0143251	0.026148	0.0115625	0.0177626	0.0222656	0.0313628	0.00817925	0.0564709	0.0253125	0.0401758	0.013125	0.0845843	0.0217383	0.00470703	0.00351562	0.0423389	0.0420959	0.068756	0.00417535	0.0624084	0.0420959	0.063756	0.00351562	0.0563428	0.0312847	0.037398
0.0254253	0.0133143	0.00911675	0.0128125	0.0295334	0.0121181	0.0224045	0.0137587	0.0122656	0.0679111	0.0393772	0.0119293	0.0156272	0.0721299	0.0205556	0.00993055	0.0228212	0.0205556	0.0218772	0.00847222	0.023023	0.0296181	0.0269293	0.014273	0.00407118	0.0078125	0.0181793	0.00750868	0.023023	0.015957	0.0104514	0.0455095	0.0385959	0.0262847	0.008023	0.0714007	0.0254253	0.00253472	0.004273	0.0408741	0.0428532	0.054865	0.00937717	0.051447	0.0428532	0.049865	0.004273	0.0460889	0.0540647	0.0279514
0.0120508	0.0104475	0.008125	0.0234918	0.0122656	0.00729384	0.0077105	0.0102626	0.00229384	0.0667631	0.0225781	0.0190625	0.00378472	0.0742631	0.0126063	0.0190126	0.0122938	0.0126063	0.00753472	0.00830078	0.01125	0.0312695	0.0132031	0.005	0.00495009	0.0159918	0.00695312	0.0140126	0.01125	0.0150347	0.0027105	0.0488927	0.0182031	0.0250195	0.00320312	0.0776312	0.0120508	0.00173828	0.005	0.0444483	0.0385802	0.0635998	0.00378472	0.0592052	0.0385802	0.0560998	0	0.0525928	0.0313628	0.0197418
0.0254253	0.0133143	0.00911675	0.0128125	0.0295334	0.0121181	0.0224045	0.0137587	0.0122656	0.0679111	0.0393772	0.0119293	0.0156272	0.0721299	0.0205556	0.00993055	0.0228212	0.0205556	0.0218772	0.00847222	0.023023	0.0296181	0.0269293	0.014273	0.00407118	0.0078125	0.0181793	0.00750868	0.023023	0.015957	0.0104514	0.0455095	0.0385959	0.0262847	0.008023	0.0714007	0.0254253	0.00253472	0.004273	0.0408741	0.0428532	0.054865	0.00937717	0.051447	0.0428532	0.049865	0.004273	0.0460889	0.0540647	0.0279514
0.0165712	0.00883513	0.00776259	0.0124306	0.0185959	0.005	0.0132031	0.00726563	0.00667535	0.067807	0.0340647	0.0174501	0.00955078	0.0726507	0.0115625	0.0128125	0.0144531	0.0115625	0.0133008	0.00336806	0.0135438	0.0215972	0.0174501	0.00729384	0.00320312	0.00993055	0.0112001	0.00601562	0.0135438	0.0112001	0.00625	0.0447803	0.0257834	0.0161806	0.00354384	0.0711576	0.0165712	0.00305556	0.00729384	0.044381	0.0408741	0.0547608	0.00705078	0.0513428	0.0408741	0.0522608	0.00229384	0.0445959	0.0429883	0.018125
0.0456793	0.0164198	0.0147222	0.000488281	0.047717	0.0190126	0.0401584	0.0172938	0.0300195	0.0802353	0.0717795	0.0150347	0.0329514	0.0752353	0.0299501	0.00510634	0.0405751	0.0299501	0.0392014	0.00786675	0.0378472	0.0222938	0.0476128	0.0290972	0.0101063	0.00548828	0.0388628	0.00104384	0.0378472	0.0190625	0.0223459	0.043615	0.0592795	0.0139605	0.0169878	0.0670062	0.0456793	0.0144293	0.0190972	0.0531983	0.0576775	0.0425407	0.0217014	0.0420525	0.0576775	0.0475407	0.0190972	0.0396241	0.088967	0.0256272
0.00205078	0.0104475	0.013125	0.0334918	0.00726563	0.00229384	0.0027105	0.00526259	0.00229384	0.0767631	0.0275781	0.0390625	0.00378472	0.0842631	0.00260634	0.0340126	0.00229384	0.00260634	0.00253472	0.0133008	0.00125	0.0212695	0.00320312	0	0.00995009	0.0259918	0.00195312	0.0240126	0.00125	0.0100347	0.0077105	0.0588927	0.00820312	0.0200195	0.00320312	0.0876312	0.00205078	0.0117383	0.02	0.0594483	0.0435802	0.0785998	0.0137847	0.0742052	0.0435802	0.0710998	0.005	0.0625928	0.0213628	0.0147418
0.0447938	0.00889372	0.00407118	0.00885634	0.0517014	0.024707	0.0401758	0.015957	0.031148	0.0836468	0.0804514	0.00750868	0.0278906	0.0677093	0.0325195	0.00298828	0.0439258	0.0325195	0.0341406	0.0218251	0.0381337	0.025523	0.0518056	0.0293837	0.00564453	0.00135634	0.0430556	0.012207	0.0381337	0.0137587	0.018457	0.0423389	0.0601389	0.0201063	0.0133681	0.0699662	0.0447938	0.0127626	0.0193837	0.0577209	0.0579639	0.0486866	0.0228906	0.0501514	0.0579639	0.0411866	0.0193837	0.0507873	0.095625	0.0170508
0.0153472	0.00409555	0.004273	0.0236545	0.0143251	0.00945312	0.0090625	0.0065625	0.00836806	0.0771299	0.0413563	0.0227105	0.00470703	0.0729111	0.0122656	0.0194531	0.0178125	0.0122656	0.00595703	0.0132378	0.0116168	0.0236545	0.0194293	0.00786675	0.00625	0.0161545	0.0156793	0.0178125	0.0116168	0.0106272	0.00320312	0.0475407	0.0177626	0.0132378	0.0027105	0.0785014	0.0153472	0.00917535	0.0178668	0.0595373	0.046447	0.0618181	0.00970703	0.0603532	0.046447	0.0543181	0.00786675	0.0563927	0.0448633	0.00351562
0.144161	0.095761	0.0884385	0.0798903	0.131069	0.114908	0.125376	0.108658	0.114682	0.0276128	0.152319	0.074376	0.110591	0.0141753	0.13022	0.0731889	0.144126	0.13022	0.121841	0.0911924	0.135001	0.12489	0.148673	0.121251	0.0908451	0.0823903	0.134923	0.0799076	0.135001	0.112293	0.0936577	0.0138976	0.147006	0.0994736	0.100235	0.0122656	0.144161	0.0896299	0.091251	0.0301128	0.0395226	0.00774523	0.0905912	0.00921007	0.0395226	0.0102452	0.101251	0.0181793	0.188326	0.0997514
0.0115972	0.00534555	0.008023	0.0299045	0.0130751	0.00820312	0.0078125	0.0053125	0.00961806	0.0833799	0.0451063	0.0339605	0.00595703	0.0791611	0.00851562	0.0282031	0.0140625	0.00851562	0.00470703	0.0169878	0.00786675	0.0199045	0.0156793	0.00661675	0.01	0.0224045	0.0144293	0.0240625	0.00786675	0.00937717	0.00695312	0.0537907	0.0140126	0.0119878	0.0039605	0.0847514	0.0115972	0.0154253	0.0266168	0.0682873	0.050197	0.0705681	0.015957	0.0691032	0.050197	0.0630681	0.0116168	0.0626427	0.0411133	0.00226562
0.101939	0.0735388	0.0762162	0.0732236	0.105513	0.0804632	0.0975986	0.0742132	0.094682	0.0253906	0.146763	0.0921538	0.0928135	0.0119531	0.0857757	0.0787444	0.099682	0.0857757	0.0940635	0.0789701	0.0927787	0.0760014	0.106451	0.0890287	0.0764007	0.0757236	0.102701	0.0754632	0.0927787	0.075626	0.0858799	0.0116753	0.111451	0.0672514	0.0780131	0.00782118	0.101939	0.0874077	0.0990287	0.0356684	0.0273003	0.015523	0.0928135	0.0169878	0.0273003	0.018023	0.0890287	0.0137348	0.150548	0.0719736
0.0003125	0.0185921	0.0237695	0.0476128	0.00705078	0.00500868	0.00347222	0.00993055	0.00555556	0.0860014	0.028457	0.057207	0.008023	0.0974077	0.00282118	0.0506337	0.000555556	0.00282118	0.004273	0.0210156	0.000488281	0.0253906	0.000488281	0.00173828	0.0196181	0.0401128	0.00173828	0.0361806	0.000488281	0.0156793	0.0154253	0.0720373	0.00548828	0.0266406	0.00939453	0.100776	0.0003125	0.0219531	0.0317383	0.0711866	0.0503185	0.0952209	0.023023	0.0898498	0.0503185	0.0877209	0.0117383	0.0747608	0.0147418	0.0213628
0.0408681	0.0139914	0.00729384	0.00875868	0.0410959	0.0222656	0.033125	0.02	0.0215972	0.0714007	0.0537522	0.00260634	0.0218945	0.067807	0.0332031	0.00226562	0.039375	0.0332031	0.0306445	0.0125087	0.0365126	0.0366753	0.0443251	0.0252626	0.0053125	0.00375868	0.0330751	0.00625	0.0365126	0.0213563	0.0122656	0.0411866	0.0526584	0.0275087	0.0126063	0.0681889	0.0408681	0.00407118	0.00526259	0.0429748	0.0488428	0.0460889	0.0106445	0.0446241	0.0488428	0.0410889	0.0102626	0.0448302	0.0770508	0.0269531
0.0015625	0.0148421	0.0175195	0.0388628	0.00580078	0.00375868	0.00222222	0.00868056	0.00180556	0.0772514	0.022207	0.043457	0.004273	0.0886576	0.00407118	0.0393837	0.00180556	0.00407118	0.003023	0.0147656	0.00173828	0.0266406	0.00173828	0.000488281	0.0133681	0.0313628	0.000488281	0.0274306	0.00173828	0.0144293	0.00917535	0.0632873	0.00673828	0.0253906	0.00564453	0.0920257	0.0015625	0.0132031	0.0204883	0.0599366	0.0440685	0.0839709	0.014273	0.0785998	0.0440685	0.0764709	0.00548828	0.0660108	0.0159918	0.0201128
0.0286806	0.00742888	0.00260634	0.0103212	0.0326584	0.0144531	0.0240625	0.0115625	0.0150347	0.0704632	0.0496897	0.00604384	0.014707	0.0662445	0.0222656	0.00445312	0.0278125	0.0222656	0.020957	0.0115712	0.0249501	0.0269878	0.0327626	0.0162001	0.00125	0.00282118	0.0240126	0.0078125	0.0249501	0.0122938	0.00820312	0.0408741	0.0410959	0.0215712	0.00604384	0.0685014	0.0286806	0.00250868	0.00620009	0.0445373	0.0447803	0.0501514	0.00970703	0.0486866	0.0447803	0.0426514	0.00620009	0.0463927	0.0648633	0.0185156
0.0197418	0.0524354	0.0526128	0.0807834	0.00993055	0.0314258	0.013457	0.0461133	0.0127626	0.0903135	0.00180556	0.0710503	0.0178906	0.121251	0.0342383	0.076582	0.022207	0.0342383	0.0191406	0.0352105	0.0248003	0.0807834	0.0150347	0.0210503	0.0458008	0.0732834	0.0112847	0.0573633	0.0248003	0.058967	0.0251758	0.0958806	0.0133681	0.0703668	0.0334722	0.126841	0.0197418	0.031148	0.0310503	0.0727209	0.0596306	0.118947	0.0228906	0.108693	0.0596306	0.111447	0.0210503	0.0959435	0.0053125	0.0606445
0.0966553	0.0605208	0.0506983	0.0524366	0.0966098	0.0754748	0.0870373	0.070631	0.0730095	0.0171528	0.107547	0.0391358	0.0717052	0.00902778	0.0882873	0.0415685	0.0957873	0.0882873	0.0829552	0.0625928	0.0919483	0.0891032	0.101714	0.0781983	0.0503185	0.0449366	0.0879639	0.051881	0.0919483	0.0703858	0.0592248	0.00680556	0.110047	0.0786866	0.0610889	0.0112847	0.0966553	0.0485303	0.0481983	0.009375	0.0196181	0.0101063	0.0567052	0.00961806	0.0196181	0.00260634	0.0581983	0.0133008	0.137721	0.075631
0.0180751	0.0019406	0.00211806	0.0138563	0.0280295	0.00689453	0.018457	0.00205078	0.0144293	0.0788812	0.058967	0.0205556	0.013125	0.0707562	0.00970703	0.0129883	0.017207	0.00970703	0.014375	0.0140126	0.0133681	0.010523	0.0231337	0.00961806	0.00173828	0.00635634	0.0193837	0.0133008	0.0133681	0.00180556	0.0106445	0.0453858	0.031467	0.0101063	0.00250868	0.0730131	0.0180751	0.00995009	0.0196181	0.0579552	0.0481983	0.0586866	0.018125	0.0581983	0.0481983	0.0511866	0.00961806	0.051881	0.0591406	0.00705078
0.0833741	0.047474	0.0426514	0.0474366	0.0902816	0.0632873	0.078756	0.0545373	0.0697283	0.0219184	0.119032	0.0460889	0.0664709	0.0059809	0.0710998	0.0415685	0.082506	0.0710998	0.0727209	0.0604053	0.0767139	0.0641032	0.0903858	0.0679639	0.0442248	0.0399366	0.0816358	0.0507873	0.0767139	0.0523389	0.0570373	0.00375868	0.0987191	0.0586866	0.0519483	0.00823785	0.0833741	0.0513428	0.0579639	0.0191406	0.0193837	0.0101063	0.0614709	0.0115712	0.0193837	0.00260634	0.0579639	0.012207	0.134205	0.055631
0.00226562	0.0107796	0.015957	0.0378472	0.010957	0.00305556	0.00542535	0.00407118	0.00750868	0.0860014	0.0401758	0.0493945	0.008023	0.0895952	0.000868056	0.0408681	0.00250868	0.000868056	0.004273	0.0190625	0.000488281	0.015625	0.00439453	0.00173828	0.0137587	0.0303472	0.00564453	0.0303212	0.000488281	0.00786675	0.0134722	0.0642248	0.00939453	0.016875	0.00548828	0.0929632	0.00226562	0.02	0.0317383	0.0711866	0.0503185	0.0854552	0.023023	0.0820373	0.0503185	0.0779552	0.0117383	0.0689014	0.0264605	0.0115972
0.0516213	0.014979	0.00828149	0.0100154	0.050469	0.0302238	0.0416561	0.0240519	0.0312394	0.0601391	0.0709377	0.00359399	0.0284725	0.0487329	0.0411613	0.00241127	0.0512394	0.0411613	0.0372225	0.0193557	0.0453127	0.0390432	0.0570315	0.0340627	0.00936439	0.00501543	0.0457815	0.0103019	0.0453127	0.0245662	0.0168904	0.0267421	0.0620315	0.0265432	0.0175002	0.0502259	0.0516213	0.0109182	0.0140627	0.0374539	0.0422109	0.0296914	0.0172225	0.0301796	0.0422109	0.0246914	0.0190627	0.03345	0.0953475	0.0237654
0.014273	0.0126698	0.0103472	0.0301584	0.00782118	0.0117383	0.00548828	0.014707	0.00229384	0.0689853	0.0181337	0.0212847	0.0015625	0.0764853	0.0170508	0.023457	0.0167383	0.0170508	0.0053125	0.010523	0.0134722	0.0401584	0.0154253	0.00722222	0.00939453	0.0226584	0.00917535	0.018457	0.0134722	0.0217014	0.000488281	0.051115	0.0137587	0.0272418	0.00542535	0.0820756	0.014273	0.0039605	0.00722222	0.0488927	0.0408025	0.065822	0.0015625	0.0614275	0.0408025	0.058322	0.00222222	0.0570373	0.0291406	0.0175195
0.0464605	0.0105604	0.00573785	0.00830078	0.0567014	0.0252626	0.0440647	0.0165126	0.0339258	0.0853135	0.0854514	0.00917535	0.0317795	0.069376	0.0330751	0.00354384	0.0444813	0.0330751	0.0380295	0.0234918	0.0398003	0.0238563	0.0534722	0.0310503	0.00620009	0.000800781	0.0447222	0.0127626	0.0398003	0.0132031	0.0223459	0.0440056	0.0651389	0.021773	0.0150347	0.0705218	0.0464605	0.0144293	0.0210503	0.0582764	0.0596306	0.0503532	0.0267795	0.0518181	0.0596306	0.0428532	0.0210503	0.0513428	0.0995139	0.0209397
0.00635634	0.0097531	0.00993055	0.0255751	0.0124045	0.00298828	0.00673828	0.00595703	0.0027105	0.0710687	0.027717	0.0283681	0.0053125	0.0785687	0.00580078	0.024707	0.00548828	0.00580078	0.0065625	0.0101063	0.00555556	0.0222418	0.00750868	0.00180556	0.00564453	0.0180751	0.00375868	0.017207	0.00555556	0.00961806	0.00673828	0.0531983	0.015842	0.0218251	0.00250868	0.0808256	0.00635634	0.00604384	0.0118056	0.0501427	0.0403858	0.0704053	0.0103125	0.0660108	0.0403858	0.0629053	0.00180556	0.0557873	0.0278906	0.0187695
0.064572	0.0434375	0.041115	0.048131	0.0753598	0.0497803	0.0646762	0.0449366	0.0570373	0.0150694	0.101297	0.0520525	0.0568441	0.00694444	0.0550928	0.0458741	0.0625928	0.0550928	0.0605941	0.0530095	0.059865	0.0536866	0.0696306	0.053615	0.0396241	0.040631	0.0633806	0.0486866	0.059865	0.0435802	0.0518637	0.00472222	0.0812973	0.0541032	0.0440056	0.00809028	0.064572	0.046447	0.053615	0.0136806	0.0100347	0.015523	0.0568441	0.0150347	0.0100347	0.008023	0.048615	0.0101063	0.10786	0.0532699
0.0180751	0.0507687	0.0509462	0.0724501	0.0182639	0.0264258	0.018457	0.0411133	0.0144293	0.0886468	0.0101389	0.0693837	0.0228906	0.119584	0.0292383	0.071582	0.017207	0.0292383	0.0241406	0.0335438	0.0231337	0.0691167	0.0133681	0.0193837	0.0408008	0.0649501	0.00961806	0.0523633	0.0231337	0.0506337	0.0301758	0.0942139	0.0217014	0.0687001	0.0318056	0.121841	0.0180751	0.0294813	0.0293837	0.0677209	0.0579639	0.11728	0.0278906	0.107026	0.0579639	0.10978	0.0193837	0.0909435	0.0103125	0.0656445
0.0866032	0.07	0.0601775	0.0635998	0.0859848	0.0721241	0.0792074	0.0750928	0.0640685	0.0110069	0.0812973	0.048615	0.0677816	0.0185069	0.0849366	0.0538428	0.0846241	0.0849366	0.0790316	0.0603532	0.0858025	0.0991553	0.0877556	0.0720525	0.0547803	0.0560998	0.0740056	0.0563428	0.0858025	0.0776427	0.0592074	0.0162847	0.0994223	0.092072	0.0627556	0.0196528	0.0866032	0.0462907	0.0420525	0.00211806	0.0134722	0.0234918	0.0527816	0.0190972	0.0134722	0.0159918	0.0520525	0.0177626	0.11036	0.0912387
0.00347222	0.0173768	0.0194293	0.048967	0.00229384	0.00976562	0.0003125	0.0140625	0.00211806	0.0804111	0.0180751	0.0459918	0.00173828	0.0911924	0.00945312	0.0453906	0.0065625	0.00945312	0.000488281	0.0204253	0.004273	0.037717	0.004273	0.003023	0.018125	0.038967	0.003023	0.0353125	0.004273	0.0214084	0.00726563	0.067072	0.00260634	0.0310503	0.00817925	0.0986576	0.00347222	0.0157378	0.023023	0.0653185	0.0466032	0.0896306	0.0129883	0.0842595	0.0466032	0.0796306	0.008023	0.0738927	0.013457	0.0188281
0.0399306	0.0136789	0.00635634	0.0115712	0.0414084	0.0232031	0.0328125	0.0203125	0.0212847	0.0717132	0.0534397	0.00229384	0.020957	0.0674945	0.0335156	0.00320312	0.0390625	0.0335156	0.029707	0.0153212	0.0362001	0.0382378	0.0440126	0.0249501	0.005	0.00407118	0.0327626	0.0090625	0.0362001	0.0210438	0.0119531	0.0421241	0.0523459	0.0303212	0.0122938	0.0697514	0.0399306	0.00375868	0.00495009	0.0432873	0.0485303	0.0489014	0.010957	0.0474366	0.0485303	0.0414014	0.00995009	0.0476427	0.0761133	0.0272656
0.00229384	0.0210812	0.0231337	0.0469813	0.0101389	0.00720703	0.00580078	0.013457	0.004273	0.0802093	0.0220139	0.0496962	0.00820312	0.0948968	0.00689453	0.0467383	0.00205078	0.00689453	0.00695312	0.0212001	0.00407118	0.032398	0.00211806	0.00282118	0.0175195	0.0369813	0.000868056	0.034707	0.00407118	0.0184462	0.014707	0.0707764	0.0104514	0.0357313	0.00993055	0.0990287	0.00229384	0.0165126	0.0228212	0.0617834	0.0464014	0.0943116	0.0194531	0.0879639	0.0464014	0.0843116	0.00782118	0.0732873	0.0140625	0.0301758
0.00635634	0.0097531	0.00993055	0.0255751	0.0124045	0.00298828	0.00673828	0.00595703	0.0027105	0.0710687	0.027717	0.0283681	0.0053125	0.0785687	0.00580078	0.024707	0.00548828	0.00580078	0.0065625	0.0101063	0.00555556	0.0222418	0.00750868	0.00180556	0.00564453	0.0180751	0.00375868	0.017207	0.00555556	0.00961806	0.00673828	0.0531983	0.015842	0.0218251	0.00250868	0.0808256	0.00635634	0.00604384	0.0118056	0.0501427	0.0403858	0.0704053	0.0103125	0.0660108	0.0403858	0.0629053	0.00180556	0.0557873	0.0278906	0.0187695
0.0120508	0.0202132	0.0178906	0.0352105	0.0103125	0.0112001	0.0077105	0.0180751	0.00229384	0.0687162	0.0128125	0.0288281	0.00573785	0.0840287	0.0165126	0.0307313	0.0122938	0.0165126	0.00948785	0.012207	0.0132031	0.0429883	0.01125	0.00695312	0.0127626	0.0277105	0.005	0.0218251	0.0132031	0.0248003	0.00661675	0.0586584	0.01625	0.0367383	0.0090625	0.0873968	0.0120508	0.00564453	0.00695312	0.0464014	0.0405334	0.0753185	0.00573785	0.0689709	0.0405334	0.0678185	0.00195312	0.0604053	0.0215972	0.0314605
0.0706983	0.0639779	0.0566553	0.0657764	0.0682699	0.0617834	0.0635802	0.0667052	0.0520525	0.00607856	0.0646762	0.0525928	0.055631	0.0174848	0.0720959	0.0574084	0.0698302	0.0720959	0.064381	0.0539014	0.0708741	0.0924431	0.0708741	0.0596241	0.0513927	0.0582764	0.0596241	0.0554552	0.0708741	0.0713428	0.0505334	0.0152626	0.0792074	0.0845264	0.0547803	0.0197418	0.0706983	0.0423389	0.0396241	0.000800781	0.00604384	0.0259462	0.045631	0.0205751	0.00604384	0.0184462	0.0446241	0.016875	0.0873498	0.0814709
0.0121181	0.0153976	0.0130751	0.0271962	0.0146897	0.00820312	0.01	0.013125	0.00347222	0.067807	0.0210959	0.0240126	0.00705078	0.0792132	0.0135156	0.0238281	0.01125	0.0135156	0.0108008	0.0103212	0.0122938	0.0338628	0.0122938	0.00604384	0.0078125	0.0196962	0.00604384	0.016875	0.0122938	0.0177626	0.00695312	0.0538428	0.0206272	0.0309462	0.00620009	0.0814701	0.0121181	0.00375868	0.00604384	0.044381	0.0396241	0.0695264	0.00705078	0.0641553	0.0396241	0.0620264	0.00104384	0.0554552	0.0287695	0.0278906
0.0409462	0.00867888	0.00510634	0.00336806	0.0443772	0.0190625	0.0350781	0.0135156	0.0260503	0.0782757	0.0704709	0.00729384	0.0250195	0.0674945	0.028125	0.00125	0.0388281	0.028125	0.0312695	0.0124306	0.0340126	0.0225347	0.0457313	0.0252626	0.00445312	0.000868056	0.0369813	0.00476563	0.0340126	0.0135438	0.0153125	0.0396241	0.0540647	0.0146181	0.0112001	0.0660014	0.0409462	0.00961806	0.0152626	0.0523498	0.0538428	0.0431983	0.0175195	0.0436866	0.0538428	0.0406983	0.0152626	0.0433459	0.0868945	0.0165625
0.0120508	0.0202132	0.0178906	0.0352105	0.0103125	0.0112001	0.0077105	0.0180751	0.00229384	0.0687162	0.0128125	0.0288281	0.00573785	0.0840287	0.0165126	0.0307313	0.0122938	0.0165126	0.00948785	0.012207	0.0132031	0.0429883	0.01125	0.00695312	0.0127626	0.0277105	0.005	0.0218251	0.0132031	0.0248003	0.00661675	0.0586584	0.01625	0.0367383	0.0090625	0.0873968	0.0120508	0.00564453	0.00695312	0.0464014	0.0405334	0.0753185	0.00573785	0.0689709	0.0405334	0.0678185	0.00195312	0.0604053	0.0215972	0.0314605
0.0706983	0.0639779	0.0566553	0.0657764	0.0682699	0.0617834	0.0635802	0.0667052	0.0520525	0.00607856	0.0646762	0.0525928	0.055631	0.0174848	0.0720959	0.0574084	0.0698302	0.0720959	0.064381	0.0539014	0.0708741	0.0924431	0.0708741	0.0596241	0.0513927	0.0582764	0.0596241	0.0554552	0.0708741	0.0713428	0.0505334	0.0152626	0.0792074	0.0845264	0.0547803	0.0197418	0.0706983	0.0423389	0.0396241	0.000800781	0.00604384	0.0259462	0.045631	0.0205751	0.00604384	0.0184462	0.0446241	0.016875	0.0873498	0.0814709
0.0108008	0.0141975	0.014375	0.0389084	0.00351562	0.0118772	0.00229384	0.0148459	0.0027105	0.0755131	0.0188281	0.0328125	0.000868056	0.0830131	0.0146897	0.0335959	0.0143772	0.0146897	0.00211806	0.0145508	0.01	0.0400195	0.0119531	0.00625	0.0145334	0.0314084	0.00820312	0.0260959	0.01	0.0229514	0.00229384	0.0576427	0.00695312	0.0262695	0.00695312	0.0897145	0.0108008	0.0104883	0.01625	0.0590316	0.0448302	0.0748498	0.00586806	0.0704552	0.0448302	0.0673498	0.00625	0.0646762	0.0234462	0.0143251
0.106796	0.071876	0.0735735	0.0711364	0.117037	0.0843482	0.10565	0.0768482	0.0980114	0.0227479	0.152037	0.083261	0.0971152	0.00806039	0.0909107	0.0726295	0.103567	0.0909107	0.100865	0.0838274	0.098886	0.079192	0.112558	0.092636	0.0727857	0.0686364	0.106308	0.0755982	0.098886	0.0747888	0.0889316	0.0102826	0.124225	0.0771087	0.0791204	0.00545622	0.106796	0.0835149	0.092636	0.0283034	0.0259076	0.0153803	0.0946152	0.0168451	0.0259076	0.0128803	0.087636	0.0138698	0.15985	0.0812753
0.0053125	0.0135921	0.0137695	0.0326128	0.00705078	0.00500868	0.00347222	0.00993055	0.000555556	0.0710014	0.018457	0.032207	0.003023	0.0824077	0.00782118	0.0306337	0.00555556	0.00782118	0.004273	0.0110156	0.00548828	0.0303906	0.00548828	0.00173828	0.00961806	0.0251128	0.00173828	0.0211806	0.00548828	0.0156793	0.00542535	0.0570373	0.0104883	0.0266406	0.00439453	0.0857757	0.0053125	0.00695312	0.0117383	0.0511866	0.0403185	0.0752209	0.008023	0.0698498	0.0403185	0.0677209	0.00173828	0.0597608	0.0197418	0.0213628
0.0268251	0.0044406	0.00336806	0.00510634	0.0317795	0.00939453	0.023457	0.00580078	0.0169293	0.0751312	0.058967	0.0130556	0.016875	0.0682562	0.015957	0.00548828	0.024707	0.015957	0.020625	0.00776259	0.0208681	0.014273	0.0306337	0.0146181	0.00173828	0.00260634	0.0243837	0.00455078	0.0208681	0.00680556	0.0106445	0.0403858	0.038967	0.00885634	0.00500868	0.0667631	0.0268251	0.00745009	0.0146181	0.0517052	0.0481983	0.0474366	0.014375	0.0469483	0.0481983	0.0449366	0.00961806	0.043131	0.0678906	0.0108008
0.00205078	0.0104475	0.013125	0.0334918	0.00726563	0.00229384	0.0027105	0.00526259	0.00229384	0.0767631	0.0275781	0.0390625	0.00378472	0.0842631	0.00260634	0.0340126	0.00229384	0.00260634	0.00253472	0.0133008	0.00125	0.0212695	0.00320312	0	0.00995009	0.0259918	0.00195312	0.0240126	0.00125	0.0100347	0.0077105	0.0588927	0.00820312	0.0200195	0.00320312	0.0876312	0.00205078	0.0117383	0.02	0.0594483	0.0435802	0.0785998	0.0137847	0.0742052	0.0435802	0.0710998	0.005	0.0625928	0.0213628	0.0147418
0.0190126	0.0022531	0.00305556	0.0110438	0.027717	0.00595703	0.0187695	0.00173828	0.0147418	0.0785687	0.0592795	0.0208681	0.0140625	0.0710687	0.00939453	0.0120508	0.0175195	0.00939453	0.0153125	0.0112001	0.0136806	0.0089605	0.0234462	0.00993055	0.00205078	0.00604384	0.0196962	0.0104883	0.0136806	0.00211806	0.010957	0.0444483	0.0317795	0.00729384	0.00282118	0.0714506	0.0190126	0.0102626	0.0199306	0.0576427	0.0485108	0.0558741	0.0178125	0.0553858	0.0485108	0.0508741	0.00993055	0.0490685	0.0600781	0.00673828
0.0287695	0.00763504	0.0053125	0.0234397	0.0228906	0.0195334	0.0177626	0.0146897	0.0156793	0.0795756	0.0488281	0.01625	0.00993055	0.0714506	0.0248459	0.0156272	0.0323459	0.0248459	0.0136806	0.017207	0.0240625	0.0345508	0.0338281	0.0178125	0.00937717	0.0159397	0.0275781	0.0184397	0.0240625	0.0188889	0.00495009	0.0460802	0.0288281	0.0183008	0.00820312	0.078152	0.0287695	0.0106445	0.0178125	0.0605941	0.0513927	0.056881	0.00993055	0.0563927	0.0513927	0.049381	0.0128125	0.0570199	0.0609462	0.00635634
0.0451758	0.00865067	0.00445312	0.0077105	0.0475	0.0243251	0.0377105	0.0162001	0.0297938	0.0827787	0.076875	0.00726563	0.0260503	0.0674662	0.0327626	0.00260634	0.0447938	0.0327626	0.0323003	0.018457	0.0378906	0.0267383	0.0515625	0.0291406	0.00651259	0.0027105	0.0428125	0.00995009	0.0378906	0.0157378	0.0159918	0.0408459	0.0565625	0.0167383	0.013125	0.0689593	0.0451758	0.0125195	0.0191406	0.0579639	0.0577209	0.0453185	0.0198003	0.0467834	0.0577209	0.0403185	0.0191406	0.0485303	0.0937847	0.0139605
0.008125	0.00687332	0.0120508	0.0319878	0.0187695	0.00500868	0.0112847	0.00211806	0.0133681	0.0899077	0.0558008	0.0454883	0.0119293	0.0856889	0.00282118	0.0350087	0.00836806	0.00282118	0.00817925	0.0210156	0.00439453	0.00976562	0.012207	0.00564453	0.0118056	0.0244878	0.013457	0.0283681	0.00439453	0.0039605	0.0154253	0.0603185	0.017207	0.0110156	0.00548828	0.089057	0.008125	0.0219531	0.0356445	0.0750928	0.0542248	0.0795959	0.0269293	0.078131	0.0542248	0.0720959	0.0156445	0.0669483	0.0420855	0.00573785
0.0241213	0.011229	0.0182815	0.0250154	0.032969	0.0114738	0.0254061	0.00655189	0.0274894	0.0801391	0.0796877	0.049844	0.0259725	0.0699829	0.0111613	0.0336613	0.0224894	0.0111613	0.0222225	0.0218557	0.0165627	0.00654321	0.0282815	0.0178127	0.0181144	0.0250154	0.0295315	0.0253019	0.0165627	0.00831621	0.0256404	0.0454921	0.0332815	0.00404321	0.0137502	0.0677259	0.0241213	0.0321682	0.0478127	0.0699539	0.0509609	0.0571914	0.0372225	0.0576796	0.0509609	0.0571914	0.0278127	0.04845	0.0678475	0.00626543
0.000800781	0.0141975	0.019375	0.0422418	0.00851562	0.00354384	0.0039605	0.00651259	0.00604384	0.0855131	0.0338281	0.0528125	0.00753472	0.0930131	0.00135634	0.0452626	0.00104384	0.00135634	0.00378472	0.0195508	0	0.0200195	0.00195312	0.00125	0.0162001	0.0347418	0.00320312	0.0327626	0	0.0112847	0.0139605	0.0676427	0.00695312	0.0212695	0.00695312	0.0963812	0.000800781	0.0204883	0.03125	0.0706983	0.0498302	0.0898498	0.0225347	0.0854552	0.0498302	0.0823498	0.01125	0.0713428	0.0201128	0.0159918
0.0274894	0.0139721	0.0216495	0.0224113	0.0384204	0.0118557	0.0303713	0.00755884	0.0313436	0.0822572	0.0857641	0.052587	0.0315627	0.0727259	0.0121682	0.0340432	0.0241213	0.0121682	0.0278127	0.0214738	0.0193058	0.00407793	0.0310245	0.0205558	0.0197463	0.0249113	0.0322745	0.0238088	0.0193058	0.00883705	0.0306057	0.0469852	0.0393579	0.00366127	0.0164933	0.0674829	0.0274894	0.0349113	0.0505558	0.0709609	0.0537039	0.0568094	0.0415627	0.0572977	0.0537039	0.0593094	0.0305558	0.046957	0.0734377	0.0106057
0.000868056	0.0191476	0.0243251	0.0459462	0.0109397	0.00445312	0.00625	0.009375	0.00722222	0.086557	0.0323459	0.0577626	0.0108008	0.0979632	0.00226562	0.0500781	0	0.00226562	0.00705078	0.0215712	0.00104384	0.0226128	0.00104384	0.00229384	0.0190625	0.0384462	0.00229384	0.035625	0.00104384	0.0140126	0.0182031	0.0725928	0.00937717	0.0271962	0.00995009	0.10022	0.000868056	0.0225087	0.0322938	0.070631	0.0508741	0.0957764	0.0258008	0.0904053	0.0508741	0.0882764	0.0122938	0.0742052	0.0175195	0.0241406
0.0711866	0.0595833	0.0522608	0.0604053	0.0697348	0.0603185	0.0640685	0.0632873	0.0525407	0.00559028	0.0700473	0.0481983	0.0551427	0.0130903	0.070631	0.0520373	0.0703185	0.070631	0.0638927	0.0524366	0.0703858	0.087072	0.0723389	0.0591358	0.0479748	0.0529053	0.0610889	0.0520373	0.0703858	0.0669483	0.0490685	0.0108681	0.0806723	0.0791553	0.0523389	0.0153472	0.0711866	0.0408741	0.0391358	0.0003125	0.00555556	0.0205751	0.0451427	0.0161806	0.00555556	0.0130751	0.0441358	0.013457	0.0927209	0.0760998
0.0213563	0.0147531	0.00993055	0.0205751	0.0224045	0.0129883	0.0167383	0.015957	0.0077105	0.0660687	0.027717	0.0133681	0.0103125	0.0735687	0.0208008	0.014707	0.0204883	0.0208008	0.0165625	0.0101063	0.0205556	0.0372418	0.0225087	0.0118056	0.00564453	0.0130751	0.0137587	0.012207	0.0205556	0.0196181	0.00673828	0.0481983	0.030842	0.0318251	0.00750868	0.0758256	0.0213563	0.00104384	0.00180556	0.0401427	0.0403858	0.0604053	0.0053125	0.0560108	0.0403858	0.0529053	0.00180556	0.0507873	0.0428906	0.0287695
0.0415972	0.0153455	0.008023	0.0110156	0.0464084	0.0237587	0.0367014	0.0208681	0.0240625	0.0733799	0.0584397	0.0039605	0.0248459	0.0691611	0.0340712	0.00375868	0.0396181	0.0340712	0.0335959	0.0169878	0.0378668	0.0365712	0.0456793	0.0266168	0.00555556	0.00351562	0.0344293	0.00961806	0.0378668	0.0204883	0.015842	0.0437907	0.0573459	0.0319878	0.0139605	0.0703069	0.0415972	0.00542535	0.00661675	0.0438428	0.050197	0.0505681	0.0148459	0.0491032	0.050197	0.0430681	0.0116168	0.0481983	0.0800022	0.0311545
0.00253472	0.0208143	0.0259918	0.0542795	0.00260634	0.00945312	0.00125	0.014375	0.00555556	0.0882236	0.0240126	0.0594293	0.00580078	0.0996299	0.00726563	0.0550781	0.005	0.00726563	0.00205078	0.0232378	0.0027105	0.0342795	0.0027105	0.0039605	0.0240625	0.0467795	0.0039605	0.040625	0.0027105	0.0223459	0.0132031	0.0742595	0.00104384	0.0288628	0.0116168	0.10522	0.00253472	0.0241753	0.0339605	0.075631	0.0525407	0.0974431	0.0208008	0.092072	0.0525407	0.0899431	0.0139605	0.0792052	0.0125195	0.0191406
0.00508705	0.0128588	0.0161613	0.0305558	0.0123852	0.00234399	0.00734399	0.00593774	0.00581621	0.0584877	0.0333227	0.0414738	0.00904321	0.0666127	0.00328149	0.0340627	0.00359399	0.00328149	0.00779321	0.012587	0.00366127	0.0184725	0.00561439	0.00241127	0.0112502	0.0255558	0.00436439	0.0221877	0.00366127	0.0102238	0.012344	0.0446219	0.0139477	0.0193058	0.00561439	0.0669946	0.00508705	0.0141495	0.0224113	0.0446914	0.0305594	0.0624539	0.0177932	0.0580594	0.0305594	0.0574539	0.00741127	0.0453359	0.0266213	0.0187502
0.00253472	0.0208143	0.0259918	0.0542795	0.00260634	0.00945312	0.00125	0.014375	0.00555556	0.0882236	0.0240126	0.0594293	0.00580078	0.0996299	0.00726563	0.0550781	0.005	0.00726563	0.00205078	0.0232378	0.0027105	0.0342795	0.0027105	0.0039605	0.0240625	0.0467795	0.0039605	0.040625	0.0027105	0.0223459	0.0132031	0.0742595	0.00104384	0.0288628	0.0116168	0.10522	0.00253472	0.0241753	0.0339605	0.075631	0.0525407	0.0974431	0.0208008	0.092072	0.0525407	0.0899431	0.0139605	0.0792052	0.0125195	0.0191406
0.039375	0.0131233	0.00580078	0.0132378	0.0375195	0.0237587	0.0300347	0.0208681	0.0196181	0.0711576	0.0495508	0.00173828	0.0181793	0.0669389	0.0340712	0.00375868	0.0396181	0.0340712	0.0269293	0.0147656	0.0356445	0.0410156	0.043457	0.0243945	0.00555556	0.00573785	0.032207	0.00961806	0.0356445	0.0227105	0.00917535	0.0415685	0.048457	0.0297656	0.0117383	0.0703069	0.039375	0.00320312	0.00439453	0.0438428	0.0479748	0.0483459	0.00817925	0.046881	0.0479748	0.0408459	0.00939453	0.0481983	0.0733355	0.0244878
0.0126063	0.0110031	0.00868056	0.0262695	0.00948785	0.0089605	0.00604384	0.0119293	0.00173828	0.0673187	0.0198003	0.0196181	0.00211806	0.0748187	0.014273	0.0206793	0.0139605	0.014273	0.00586806	0.00885634	0.0118056	0.0351584	0.0137587	0.00555556	0.00661675	0.0187695	0.00750868	0.0156793	0.0118056	0.0178125	0.00104384	0.0494483	0.0154253	0.0255751	0.00375868	0.0792978	0.0126063	0.00229384	0.00555556	0.046115	0.0391358	0.0641553	0.00211806	0.0597608	0.0391358	0.0566553	0.000555556	0.0542595	0.0296962	0.0180751
0.0751514	0.0574154	0.0513428	0.0510108	0.0721762	0.0585802	0.0667834	0.0608459	0.0552556	0.00607856	0.0776449	0.0460303	0.058131	0.0109223	0.0701427	0.0463927	0.0730334	0.0701427	0.066881	0.0469483	0.0721241	0.0801775	0.0760303	0.0608741	0.0467834	0.0485108	0.0647803	0.0445959	0.0721241	0.0647803	0.0498302	0.00620009	0.0843637	0.0697608	0.0521241	0.00942925	0.0751514	0.0416358	0.0408741	0.000800781	0.00729384	0.0111806	0.045631	0.00776259	0.00729384	0.00868056	0.0458741	0.00601562	0.101569	0.0717052
0.0147418	0.00860726	0.0137847	0.0371897	0.0196962	0.0118945	0.013457	0.00705078	0.0177626	0.0955478	0.0606337	0.0472222	0.013125	0.0874228	0.00970703	0.0379883	0.017207	0.00970703	0.009375	0.0256793	0.0100347	0.0171897	0.0198003	0.0112847	0.0167383	0.0296897	0.0210503	0.0333008	0.0100347	0.0101389	0.0156445	0.0620525	0.0181337	0.011773	0.00917535	0.0930131	0.0147418	0.0266168	0.0412847	0.0829552	0.059865	0.0803532	0.028125	0.079865	0.059865	0.0728532	0.0212847	0.071881	0.0491406	0.00205078
0.0213853	0.00185571	0.00542825	0.0156388	0.0267564	0.00944084	0.01892	0.00522209	0.0160033	0.0608796	0.0583189	0.0232408	0.014213	0.0533796	0.0128783	0.0155346	0.0210033	0.0128783	0.015463	0.0135728	0.0160533	0.0146665	0.0258189	0.0123033	0.00553459	0.0106388	0.0220689	0.0139721	0.0160533	0.00671297	0.0111075	0.0313889	0.0308189	0.00966653	0.00519388	0.0548727	0.0213853	0.0126353	0.0223033	0.0456945	0.0354514	0.0428147	0.017963	0.0423264	0.0354514	0.0378147	0.0123033	0.0371202	0.0602286	0.00688876
0.0197418	0.0524354	0.0526128	0.0807834	0.00993055	0.0314258	0.013457	0.0461133	0.0127626	0.0903135	0.00180556	0.0710503	0.0178906	0.121251	0.0342383	0.076582	0.022207	0.0342383	0.0191406	0.0352105	0.0248003	0.0807834	0.0150347	0.0210503	0.0458008	0.0732834	0.0112847	0.0573633	0.0248003	0.058967	0.0251758	0.0958806	0.0133681	0.0703668	0.0334722	0.126841	0.0197418	0.031148	0.0310503	0.0727209	0.0596306	0.118947	0.0228906	0.108693	0.0596306	0.111447	0.0210503	0.0959435	0.0053125	0.0606445
0.10897	0.0778357	0.0705131	0.0769736	0.108091	0.0914007	0.0996299	0.086557	0.0892132	0.009375	0.124029	0.0664506	0.0867978	0.00125	0.101713	0.0674945	0.109213	0.101713	0.0955478	0.0824077	0.104263	0.104751	0.114029	0.0930131	0.0712445	0.0694736	0.102779	0.075307	0.104263	0.0874228	0.0768174	0.00597222	0.119029	0.0935014	0.0784037	0.00461806	0.10897	0.0708451	0.0730131	0.0121528	0.0162847	0.011773	0.0767978	0.0112847	0.0162847	0.004273	0.0780131	0.0135786	0.147813	0.0882236
0.0252626	0.0035031	0.00180556	0.00729384	0.031467	0.00970703	0.0225195	0.00548828	0.0159918	0.0748187	0.0580295	0.0121181	0.0153125	0.0673187	0.0156445	0.00580078	0.0237695	0.0156445	0.0190625	0.00995009	0.0199306	0.0152105	0.0296962	0.0136806	0.000800781	0.00229384	0.0234462	0.00673828	0.0199306	0.00586806	0.00970703	0.0406983	0.0380295	0.0110438	0.00407118	0.0677006	0.0252626	0.00651259	0.0136806	0.0513927	0.0472608	0.0496241	0.0140625	0.0491358	0.0472608	0.0446241	0.00868056	0.0453185	0.0663281	0.0104883
0.0720373	0.0490278	0.0485802	0.0421241	0.0824084	0.0505095	0.0724887	0.0475407	0.0637387	0.0187847	0.110221	0.0576427	0.0665316	0.0125347	0.057697	0.0466032	0.067072	0.057697	0.0702816	0.0492248	0.0654552	0.0503185	0.0752209	0.0592052	0.0441032	0.0421241	0.0689709	0.0437907	0.0654552	0.0469483	0.0596762	0.0065625	0.0902209	0.0503185	0.0495959	0.00694444	0.0720373	0.0520373	0.0592052	0.0162847	0.015625	0.0117383	0.0627816	0.01125	0.015625	0.0117383	0.0542052	0.0052105	0.117547	0.0592074
0.00920622	0.00495009	0.00789763	0.0225656	0.016231	0.00388504	0.00958817	0.00490067	0.00556039	0.072942	0.0354497	0.0263351	0.00718582	0.0765357	0.00669754	0.0216975	0.00833817	0.00669754	0.00843582	0.0110031	0.00742888	0.0192323	0.0113351	0.00367888	0.00458817	0.0150656	0.00758513	0.0161507	0.00742888	0.00758513	0.00763504	0.0511654	0.0196685	0.0188156	0.00242888	0.0787927	0.00920622	0.0069406	0.0136789	0.0520161	0.0422591	0.0673958	0.0121858	0.0639779	0.0422591	0.0598958	0.00367888	0.0547309	0.0356233	0.01576
0.0348421	0.0090625	0.011385	0.00492888	0.0452132	0.0133143	0.0352935	0.0103455	0.0265435	0.0818982	0.0730257	0.0204475	0.0293364	0.0756482	0.0205018	0.00940804	0.0298768	0.0205018	0.0330864	0.0120296	0.02826	0.0131233	0.0380257	0.02201	0.00690805	0.00492888	0.0317757	0.00659555	0.02826	0.0097531	0.022481	0.0465278	0.0530257	0.0131233	0.0124007	0.0700579	0.0348421	0.0148421	0.02201	0.05625	0.0555903	0.0517036	0.0255864	0.0512153	0.0555903	0.0517036	0.01701	0.0451758	0.0803521	0.0220122
0.000868056	0.0191476	0.0243251	0.0459462	0.0109397	0.00445312	0.00625	0.009375	0.00722222	0.086557	0.0323459	0.0577626	0.0108008	0.0979632	0.00226562	0.0500781	0	0.00226562	0.00705078	0.0215712	0.00104384	0.0226128	0.00104384	0.00229384	0.0190625	0.0384462	0.00229384	0.035625	0.00104384	0.0140126	0.0182031	0.0725928	0.00937717	0.0271962	0.00995009	0.10022	0.000868056	0.0225087	0.0322938	0.070631	0.0508741	0.0957764	0.0258008	0.0904053	0.0508741	0.0882764	0.0122938	0.0742052	0.0175195	0.0241406
0.0886468	0.0676295	0.067807	0.0785687	0.0995778	0.0755131	0.0890287	0.0687162	0.085001	0.0180751	0.134422	0.0862445	0.0827201	0.00604384	0.0783256	0.0777006	0.0877787	0.0783256	0.0839701	0.0826312	0.0829632	0.0752353	0.094682	0.0792132	0.0684037	0.0710687	0.090932	0.0799662	0.0829632	0.0674945	0.0792631	0.0107661	0.103015	0.0748187	0.0701507	0.00830078	0.0886468	0.0785687	0.0892132	0.0272418	0.0174848	0.0230903	0.0877201	0.0235786	0.0174848	0.0155903	0.0792132	0.0182378	0.134595	0.0717631
0.0243251	0.0031906	0.000868056	0.0101063	0.0317795	0.0106445	0.022207	0.00580078	0.0156793	0.0751312	0.057717	0.0118056	0.014375	0.0670062	0.015957	0.00673828	0.023457	0.015957	0.018125	0.0127626	0.0196181	0.016773	0.0293837	0.0133681	0.000488281	0.00260634	0.0231337	0.00955078	0.0196181	0.00555556	0.00939453	0.0416358	0.037717	0.0138563	0.00375868	0.0692631	0.0243251	0.00620009	0.0133681	0.0517052	0.0469483	0.0524366	0.014375	0.0519483	0.0469483	0.0449366	0.00836806	0.048131	0.0653906	0.0108008
0.0651758	0.0224007	0.0169531	0.00354384	0.0725	0.0347418	0.0606272	0.0278668	0.0468772	0.0902787	0.098125	0.0110156	0.047717	0.0762162	0.0469293	0.003023	0.0602105	0.0469293	0.056467	0.023457	0.0566406	0.0317383	0.0703125	0.0453906	0.0144293	0.00354384	0.0590625	0.00911675	0.0566406	0.0253212	0.0339084	0.0470959	0.0853125	0.0267383	0.026875	0.070626	0.0651758	0.0212695	0.0253906	0.0596306	0.0689709	0.0453185	0.033967	0.0467834	0.0689709	0.0453185	0.0303906	0.047697	0.120451	0.0356272
0.0053125	0.0235921	0.0287695	0.0592795	0.00205078	0.013342	0.00180556	0.0182639	0.00722222	0.0910014	0.023457	0.062207	0.00635634	0.102408	0.0111545	0.058967	0.00888889	0.0111545	0.00260634	0.0260156	0.00548828	0.0403906	0.00548828	0.00673828	0.0279514	0.0517795	0.00673828	0.0445139	0.00548828	0.0273459	0.0137587	0.0770373	0.000488281	0.0316406	0.0143945	0.109109	0.0053125	0.0269531	0.0367383	0.0795199	0.0553185	0.100221	0.0213563	0.0948498	0.0553185	0.0927209	0.0167383	0.0830941	0.0130751	0.0196962
0.0150195	0.00763504	0.0140625	0.025523	0.0241406	0.00620009	0.0169293	0.00260634	0.0190126	0.0933256	0.0663281	0.04625	0.0178472	0.0864506	0.00526259	0.0322938	0.0140126	0.00526259	0.0140972	0.018457	0.0090625	0.00580078	0.0188281	0.0103125	0.0135438	0.023023	0.0200781	0.0238563	0.0090625	0.00472222	0.0191168	0.0585802	0.0238281	0.00455078	0.00820312	0.0860687	0.0150195	0.0256445	0.0403125	0.0785108	0.0588927	0.073131	0.0303472	0.0726427	0.0588927	0.070631	0.0203125	0.0624366	0.0538628	0.004273
0.00580078	0.0191975	0.024375	0.0539084	0.00351562	0.0118772	0.00229384	0.0148459	0.0077105	0.0905131	0.0288281	0.0578125	0.00586806	0.0980131	0.00968967	0.0535959	0.00937717	0.00968967	0.00211806	0.0245508	0.005	0.0350195	0.00695312	0.00625	0.0245334	0.0464084	0.00820312	0.0410959	0.005	0.0229514	0.0122938	0.0726427	0.00195312	0.0262695	0.0119531	0.104715	0.00580078	0.0254883	0.03625	0.0790316	0.0548302	0.0948498	0.0208681	0.0904552	0.0548302	0.0873498	0.01625	0.0796762	0.0184462	0.0143251
0.0462695	0.013885	0.0078125	0.006773	0.0428906	0.0249501	0.0356793	0.0213563	0.0252626	0.0745756	0.0600781	0.0025	0.0240972	0.0677006	0.0365126	0.00104384	0.0452626	0.0365126	0.0328472	0.012207	0.0403125	0.0370508	0.0500781	0.0290625	0.00729384	0.004273	0.0388281	0.00510634	0.0403125	0.0234722	0.0128668	0.0398302	0.0550781	0.0233008	0.0144531	0.0673187	0.0462695	0.00689453	0.0090625	0.0472608	0.0526427	0.041881	0.0115972	0.0413927	0.0526427	0.039381	0.0140625	0.0436866	0.0851128	0.023023
0.0352344	0.0243588	0.0211914	0.0303125	0.032806	0.0263195	0.0281163	0.0312413	0.0165886	0.0709233	0.0292123	0.0171289	0.0201671	0.0823295	0.036632	0.0219445	0.0343663	0.036632	0.0289171	0.0184375	0.0354102	0.0569792	0.0354102	0.0241602	0.0159288	0.0228125	0.0241602	0.0199913	0.0354102	0.0358789	0.0150695	0.0569592	0.0437435	0.0490625	0.0193164	0.0845865	0.0352344	0.00687502	0.00416018	0.0424974	0.0477404	0.0676428	0.0101671	0.0622717	0.0477404	0.0601428	0.00916018	0.0585716	0.0518859	0.046007
0.0396788	0.0288033	0.0256359	0.0303125	0.0439171	0.0285417	0.0370052	0.0334636	0.0232552	0.0753677	0.0403234	0.0215734	0.029056	0.086774	0.0388542	0.0241667	0.0365886	0.0388542	0.037806	0.022882	0.0398546	0.054757	0.0398546	0.0286046	0.0181511	0.0228125	0.0286046	0.0222136	0.0398546	0.0358789	0.0239584	0.0614036	0.0548546	0.053507	0.0237609	0.0868087	0.0396788	0.0113195	0.00860462	0.0447196	0.0521849	0.0720872	0.019056	0.0667161	0.0521849	0.0645872	0.0136046	0.0607938	0.0607748	0.0548959
0.00351562	0.00702957	0.00970703	0.0290972	0.00970703	0.00180556	0.00417535	0.00282118	0.00375868	0.0772514	0.0339258	0.0356445	0.004273	0.0808451	0.00211806	0.0296181	0.00375868	0.00211806	0.003023	0.0128125	0.00173828	0.016875	0.00564453	0.000488281	0.00750868	0.0215972	0.00439453	0.0215712	0.00173828	0.00661675	0.00722222	0.0554748	0.0106445	0.015625	0.00173828	0.0842132	0.00351562	0.01125	0.0204883	0.0599366	0.0440685	0.0742052	0.014273	0.0707873	0.0440685	0.0667052	0.00548828	0.0601514	0.0277105	0.0103472
0.0167323	0.0027105	0.00565805	0.0161507	0.0290435	0.00639372	0.0193364	0.0035031	0.0141975	0.0785149	0.0560747	0.0240955	0.014981	0.0742962	0.00920622	0.0163937	0.0147531	0.00920622	0.016231	0.0146229	0.0130018	0.0117062	0.0208143	0.00925179	0.0031906	0.00865067	0.0170643	0.0147531	0.0130018	0.00312332	0.0134771	0.0489258	0.032481	0.0146229	0.00409555	0.075442	0.0167323	0.0105604	0.0192518	0.0564779	0.047832	0.0632031	0.019981	0.0617383	0.047832	0.0557031	0.00925179	0.0533333	0.0551372	0.0137896
0.0110921	0.00195312	0.00490067	0.0208143	0.01576	0.00492888	0.00925179	0.00399138	0.00633513	0.0738513	0.038885	0.0233382	0.00587289	0.0735388	0.00774138	0.0188351	0.0113351	0.00774138	0.00712289	0.0109358	0.00833817	0.0185921	0.0141975	0.00458817	0.00367888	0.0133143	0.0104475	0.0152414	0.00833817	0.00681039	0.00534555	0.0481684	0.0191975	0.0148421	0.00138504	0.0769068	0.0110921	0.00687332	0.0145882	0.0540365	0.0431684	0.0634223	0.0108729	0.0609809	0.0431684	0.0559223	0.00458817	0.0538216	0.0401698	0.00956429
0.0580404	0.0391358	0.0420833	0.0538216	0.0679948	0.0468598	0.0584223	0.0420161	0.0543945	0.0185378	0.0989323	0.0605208	0.0530903	0.0104128	0.0496723	0.0529536	0.0571723	0.0496723	0.0543403	0.0539779	0.0533333	0.0504883	0.063099	0.0495833	0.0417036	0.0463216	0.059349	0.0532661	0.0533333	0.0417708	0.0506098	0.0081906	0.0714323	0.0500716	0.042474	0.0126698	0.0580404	0.0499154	0.0595833	0.02076	0.0110031	0.0214914	0.0580903	0.0210031	0.0110031	0.0139914	0.0495833	0.0146858	0.0991059	0.0470161
0.0215972	0.00534555	0.003023	0.0110156	0.0314084	0.00875868	0.0217014	0.00586806	0.0140625	0.0733799	0.0534397	0.0139605	0.0148459	0.0691611	0.0140712	0.00875868	0.0196181	0.0140712	0.0185959	0.0119878	0.0178668	0.0165712	0.0256793	0.0116168	0.000555556	0.00351562	0.0194293	0.00961806	0.0178668	0.00548828	0.010842	0.0437907	0.0373459	0.0169878	0.0039605	0.0703069	0.0215972	0.00542535	0.0116168	0.0488428	0.045197	0.0555681	0.0148459	0.0541032	0.045197	0.0480681	0.00661675	0.0481983	0.0600022	0.0161545
0.0939275	0.0626758	0.0528532	0.0533459	0.0962387	0.0735889	0.0865316	0.0706983	0.0713927	0.0154015	0.10327	0.0412907	0.0721762	0.0111827	0.0864014	0.0435889	0.0919483	0.0864014	0.0834262	0.0618181	0.090197	0.0889014	0.0980095	0.076447	0.0503858	0.0458459	0.0842595	0.0519483	0.090197	0.0703185	0.0606723	0.0089605	0.109676	0.0818181	0.0612907	0.0123286	0.0939275	0.0477556	0.046447	0.00651259	0.0178668	0.0132378	0.0571762	0.011773	0.0178668	0.00573785	0.056447	0.0133681	0.132332	0.0809848
0.000800781	0.0141975	0.019375	0.0422418	0.00851562	0.00354384	0.0039605	0.00651259	0.00604384	0.0855131	0.0338281	0.0528125	0.00753472	0.0930131	0.00135634	0.0452626	0.00104384	0.00135634	0.00378472	0.0195508	0	0.0200195	0.00195312	0.00125	0.0162001	0.0347418	0.00320312	0.0327626	0	0.0112847	0.0139605	0.0676427	0.00695312	0.0212695	0.00695312	0.0963812	0.000800781	0.0204883	0.03125	0.0706983	0.0498302	0.0898498	0.0225347	0.0854552	0.0498302	0.0823498	0.01125	0.0713428	0.0201128	0.0159918
0.0437695	0.012635	0.0053125	0.011773	0.0428906	0.0262001	0.0344293	0.0213563	0.0240126	0.0745756	0.0588281	0.00125	0.0215972	0.0664506	0.0365126	0.00229384	0.0440126	0.0365126	0.0303472	0.017207	0.0390625	0.0395508	0.0488281	0.0278125	0.00604384	0.004273	0.0375781	0.0101063	0.0390625	0.0222222	0.0116168	0.0410802	0.0538281	0.0283008	0.0132031	0.0698187	0.0437695	0.00564453	0.0078125	0.0472608	0.0513927	0.046881	0.0115972	0.0463927	0.0513927	0.039381	0.0128125	0.0486866	0.0826128	0.023023
0.0115972	0.00534555	0.008023	0.0210156	0.0264084	0.00375868	0.0167014	0.000868056	0.0140625	0.0833799	0.0584397	0.0339605	0.0148459	0.0791611	0.00407118	0.0237587	0.00961806	0.00407118	0.0135959	0.0169878	0.00786675	0.00657118	0.0156793	0.00661675	0.00555556	0.0135156	0.0144293	0.0196181	0.00786675	0.000488281	0.015842	0.0537907	0.0273459	0.0119878	0.0039605	0.0803069	0.0115972	0.0154253	0.0266168	0.0638428	0.050197	0.0705681	0.0248459	0.0691032	0.050197	0.0630681	0.0116168	0.0581983	0.0500022	0.0111545
0.0629552	0.0467036	0.044381	0.0501514	0.0760998	0.0490056	0.0652816	0.046115	0.0565316	0.0144293	0.098131	0.0553185	0.0584262	0.0102105	0.0543181	0.0490056	0.059865	0.0543181	0.0621762	0.0533459	0.0592248	0.0545959	0.0670373	0.0529748	0.0408025	0.0426514	0.0607873	0.049865	0.0592248	0.0446241	0.0544223	0.00798828	0.0820373	0.0583459	0.0453185	0.0102452	0.0629552	0.0467834	0.0529748	0.0119293	0.00939453	0.0197656	0.0584262	0.0183008	0.00939453	0.0122656	0.0479748	0.0112847	0.103582	0.0597348
0.0337847	0.0270643	0.0197418	0.0355295	0.0213563	0.0282031	0.02	0.033125	0.0118056	0.0694736	0.0177626	0.0156793	0.0120508	0.0808799	0.0385156	0.0238281	0.03625	0.0385156	0.0208008	0.0169878	0.0339605	0.0655295	0.0339605	0.0227105	0.0178125	0.0280295	0.0227105	0.021875	0.0339605	0.0410959	0.00695312	0.0555095	0.0322938	0.0476128	0.0178668	0.0864701	0.0337847	0.00542535	0.0027105	0.044381	0.0462907	0.0661931	0.00205078	0.060822	0.0462907	0.0586931	0.0077105	0.0604552	0.0437695	0.0378906
0.0434182	0.0159165	0.00984399	0.00978106	0.0390627	0.0240519	0.0328279	0.0224113	0.0224113	0.0526391	0.052344	0.00453149	0.0222225	0.0496704	0.0356144	0.00405189	0.0424113	0.0356144	0.0309725	0.0113088	0.0384377	0.0400588	0.0462502	0.0271877	0.00834877	0.00728106	0.0350002	0.00616127	0.0384377	0.0255037	0.0119686	0.0264296	0.0512502	0.0263088	0.0145315	0.0492884	0.0434182	0.00599634	0.00718774	0.0299539	0.0353359	0.029457	0.00972246	0.0279921	0.0353359	0.026957	0.0121877	0.0293094	0.0773787	0.0260311
0.00726563	0.0157796	0.020957	0.0495139	0.00595703	0.0113889	0.00375868	0.0124045	0.00917535	0.0910014	0.0351758	0.0543945	0.00635634	0.0945951	0.00920139	0.0492014	0.010842	0.00920139	0.00260634	0.0240625	0.00548828	0.030625	0.00939453	0.00673828	0.022092	0.0420139	0.0106445	0.0386545	0.00548828	0.0195334	0.0118056	0.0692248	0.00439453	0.021875	0.0104883	0.101297	0.00726563	0.025	0.0367383	0.0795199	0.0553185	0.0904552	0.0213563	0.0870373	0.0553185	0.0829552	0.0167383	0.0772348	0.0247938	0.00993055
0.081115	0.0542383	0.0475407	0.0556723	0.0713428	0.0658459	0.0667052	0.0635802	0.0585108	0.011339	0.0839991	0.0428532	0.0554748	0.00774523	0.0767834	0.0458459	0.0829552	0.0767834	0.0642248	0.0527556	0.0767595	0.0869223	0.084572	0.0655095	0.0488927	0.0506723	0.073322	0.0498302	0.0767595	0.0682699	0.0458459	0.004273	0.0829053	0.0677556	0.0528532	0.0114605	0.081115	0.0443181	0.0455095	0.00939453	0.0119293	0.00917535	0.0442248	0.0077105	0.0119293	0.00417535	0.0505095	0.01125	0.110631	0.0605334
0.0003125	0.0185921	0.0237695	0.0476128	0.00705078	0.00500868	0.00347222	0.00993055	0.00555556	0.0860014	0.028457	0.057207	0.008023	0.0974077	0.00282118	0.0506337	0.000555556	0.00282118	0.004273	0.0210156	0.000488281	0.0253906	0.000488281	0.00173828	0.0196181	0.0401128	0.00173828	0.0361806	0.000488281	0.0156793	0.0154253	0.0720373	0.00548828	0.0266406	0.00939453	0.100776	0.0003125	0.0219531	0.0317383	0.0711866	0.0503185	0.0952209	0.023023	0.0898498	0.0503185	0.0877209	0.0117383	0.0747608	0.0147418	0.0213628
0.0795257	0.0683912	0.0710687	0.0853069	0.0919801	0.0708451	0.0824076	0.0660014	0.0808799	0.0199306	0.127918	0.0970062	0.0795756	0.0118056	0.0711576	0.0869389	0.0786576	0.0711576	0.0783256	0.0829632	0.0748187	0.0719736	0.0845843	0.0735687	0.0706889	0.0778069	0.0833343	0.0847514	0.0748187	0.0657562	0.0795951	0.0165278	0.0929176	0.074057	0.0689593	0.0140625	0.0795257	0.0814007	0.0935687	0.0315972	0.0168403	0.0323286	0.0895756	0.0318403	0.0168403	0.0248286	0.0785687	0.023023	0.120591	0.0710014
0.0115972	0.00534555	0.008023	0.0299045	0.0130751	0.00820312	0.0078125	0.0053125	0.00961806	0.0833799	0.0451063	0.0339605	0.00595703	0.0791611	0.00851562	0.0282031	0.0140625	0.00851562	0.00470703	0.0169878	0.00786675	0.0199045	0.0156793	0.00661675	0.01	0.0224045	0.0144293	0.0240625	0.00786675	0.00937717	0.00695312	0.0537907	0.0140126	0.0119878	0.0039605	0.0847514	0.0115972	0.0154253	0.0266168	0.0682873	0.050197	0.0705681	0.015957	0.0691032	0.050197	0.0630681	0.0116168	0.0626427	0.0411133	0.00226562
0.0197418	0.00360726	0.00378472	0.0221897	0.0196962	0.0118945	0.013457	0.00705078	0.0127626	0.0805478	0.0506337	0.0222222	0.008125	0.0724228	0.014707	0.0179883	0.022207	0.014707	0.009375	0.0156793	0.0150347	0.0221897	0.0248003	0.0112847	0.00673828	0.0146897	0.0210503	0.0183008	0.0150347	0.0101389	0.00564453	0.0470525	0.0231337	0.011773	0.00417535	0.0780131	0.0197418	0.0116168	0.0212847	0.0629552	0.049865	0.0603532	0.013125	0.059865	0.049865	0.0528532	0.0112847	0.056881	0.0541406	0.00205078
0.0103472	0.00909554	0.014273	0.0386545	0.0143251	0.00945312	0.0090625	0.0065625	0.0133681	0.0921299	0.0513563	0.0477105	0.00970703	0.0879111	0.00726563	0.0394531	0.0128125	0.00726563	0.00595703	0.0232378	0.00661675	0.0186545	0.0144293	0.00786675	0.01625	0.0311545	0.0156793	0.0328125	0.00661675	0.0106272	0.0132031	0.0625407	0.0127626	0.0132378	0.0077105	0.0935014	0.0103472	0.0241753	0.0378668	0.0795373	0.056447	0.0818181	0.024707	0.0803532	0.056447	0.0743181	0.0178668	0.0713927	0.0398633	0.00351562
0.0152626	0.0035031	0.00680556	0.0172938	0.026467	0.00470703	0.0175195	0.000488281	0.0159918	0.0848187	0.0630295	0.0321181	0.0153125	0.0773187	0.00564453	0.0208008	0.0137695	0.00564453	0.0140625	0.0149501	0.00993055	0.0052105	0.0196962	0.00868056	0.00580078	0.0122938	0.0184462	0.0167383	0.00993055	0.000868056	0.014707	0.0506983	0.0280295	0.00604384	0.00407118	0.0777006	0.0152626	0.0165126	0.0286806	0.0663927	0.0522608	0.0646241	0.0240625	0.0641358	0.0522608	0.0596241	0.0136806	0.0553185	0.0563281	0.00548828
0.0601775	0.0439258	0.0416032	0.0584848	0.0566553	0.0517834	0.0513927	0.0488927	0.0481983	0.0116515	0.0786866	0.0525407	0.0445373	0.00743273	0.0570959	0.0517834	0.0626427	0.0570959	0.0482873	0.0505681	0.056447	0.0684848	0.0642595	0.050197	0.0435802	0.0509848	0.0580095	0.0526427	0.056447	0.0529574	0.0405334	0.0052105	0.0625928	0.0555681	0.0425407	0.013023	0.0601775	0.0440056	0.050197	0.014707	0.00661675	0.0169878	0.0445373	0.015523	0.00661675	0.00948785	0.045197	0.0140625	0.0896935	0.0458459
0.0885127	0.0524954	0.0451729	0.0484346	0.0919437	0.067879	0.0813947	0.0610822	0.0698669	0.0180336	0.111787	0.0411104	0.0675861	0.00600235	0.0781915	0.0400665	0.0876447	0.0781915	0.0763361	0.0599971	0.0828291	0.0751013	0.0945479	0.0715791	0.0457697	0.0409346	0.0832979	0.0498322	0.0828291	0.0598604	0.056629	0.00378013	0.102881	0.0671846	0.0550166	0.0082593	0.0885127	0.0484346	0.0515791	0.0127558	0.0179989	0.00860435	0.0575861	0.00909263	0.0179989	0.00110435	0.0565791	0.0112519	0.134461	0.064129
0.008023	0.0114198	0.0115972	0.0339084	0.00407118	0.00798828	0.00173828	0.010957	0.00104384	0.0727353	0.0193837	0.0300347	0.0003125	0.0802353	0.0108008	0.029707	0.0104883	0.0108008	0.0015625	0.011773	0.00722222	0.0339084	0.00917535	0.00347222	0.0106445	0.0264084	0.00542535	0.022207	0.00722222	0.0179514	0.00173828	0.054865	0.00750868	0.0234918	0.00417535	0.0858256	0.008023	0.0077105	0.0134722	0.0551427	0.0420525	0.072072	0.0053125	0.0676775	0.0420525	0.064572	0.00347222	0.0607873	0.0228906	0.0137695
0.0823498	0.0512153	0.0438927	0.0503532	0.0814709	0.0647803	0.0730095	0.0599366	0.0625928	0.0128472	0.0974084	0.0398302	0.0601775	0.00472222	0.0750928	0.0408741	0.0825928	0.0750928	0.0689275	0.0557873	0.0776427	0.078131	0.0874084	0.0663927	0.0446241	0.0428532	0.0761584	0.0486866	0.0776427	0.0608025	0.050197	0.0025	0.0924084	0.066881	0.0517834	0.00809028	0.0823498	0.0442248	0.0463927	0.00868056	0.0128125	0.00830078	0.0501775	0.0078125	0.0128125	0.000800781	0.0513927	0.0101063	0.121193	0.0616032
0.00294754	0.013457	0.0189046	0.0402479	0.00718582	0.00514372	0.00360726	0.0100656	0.0031906	0.0786364	0.0235921	0.0448421	0.00565805	0.0900427	0.00545622	0.0407687	0.0031906	0.00545622	0.00440805	0.0161507	0.00312332	0.0280257	0.00312332	0.00187332	0.0147531	0.0327479	0.00187332	0.0288156	0.00312332	0.0158143	0.0105604	0.0646723	0.00812332	0.0267757	0.00702957	0.0934107	0.00294754	0.0145882	0.0218733	0.0613216	0.0454536	0.0853559	0.015658	0.0799848	0.0454536	0.0778559	0.00687332	0.0673958	0.0173768	0.0214979
0.0735091	0.0585108	0.0545833	0.0589779	0.0708073	0.0607661	0.0657661	0.0643598	0.0542383	0.00666282	0.0717448	0.0498958	0.0574653	0.0147878	0.0717036	0.0524848	0.0720161	0.0717036	0.0662153	0.0510091	0.0720833	0.0868945	0.0740365	0.0608333	0.0496723	0.0539779	0.0627865	0.0506098	0.0720833	0.0686458	0.0507661	0.0113156	0.0823698	0.0777279	0.0540365	0.0151698	0.0735091	0.0425716	0.0408333	0.00138504	0.0072531	0.0191476	0.0462153	0.0147531	0.0072531	0.0141476	0.0458333	0.0120296	0.0950434	0.0771723
0.0184918	0.0549354	0.0588628	0.0820334	0.00868056	0.0289258	0.013457	0.0448633	0.0152626	0.0965635	0.00680556	0.0835503	0.0216406	0.128751	0.0304883	0.084082	0.019707	0.0304883	0.0203906	0.0339605	0.0223003	0.0745334	0.0125347	0.0210503	0.0508008	0.0795334	0.0112847	0.0586133	0.0223003	0.058967	0.0301758	0.100881	0.0108681	0.0641168	0.0359722	0.130591	0.0184918	0.038648	0.0410503	0.0814709	0.0646306	0.122697	0.0291406	0.112443	0.0646306	0.120197	0.0260503	0.0971935	0.0040625	0.0593945
0.0143945	0.00615067	0.00820312	0.0128668	0.0153125	0.00260634	0.0106793	0.00354384	0.00776259	0.0734037	0.0403125	0.0247656	0.00917535	0.0749662	0.00729384	0.0165126	0.0127626	0.00729384	0.0104253	0.00298828	0.00976562	0.0143945	0.015625	0.00601562	0.00510634	0.0128668	0.011875	0.00729384	0.00976562	0.00823785	0.006773	0.0458459	0.020625	0.00689453	0.0028125	0.0727093	0.0143945	0.00830078	0.0160156	0.0535889	0.0445959	0.0554748	0.0104253	0.0530334	0.0445959	0.0554748	0.00601562	0.0458741	0.0434722	0.00911675
0.000800781	0.0141975	0.019375	0.0422418	0.00851562	0.00354384	0.0039605	0.00651259	0.00604384	0.0855131	0.0338281	0.0528125	0.00753472	0.0930131	0.00135634	0.0452626	0.00104384	0.00135634	0.00378472	0.0195508	0	0.0200195	0.00195312	0.00125	0.0162001	0.0347418	0.00320312	0.0327626	0	0.0112847	0.0139605	0.0676427	0.00695312	0.0212695	0.00695312	0.0963812	0.000800781	0.0204883	0.03125	0.0706983	0.0498302	0.0898498	0.0225347	0.0854552	0.0498302	0.0823498	0.01125	0.0713428	0.0201128	0.0159918
0.0730218	0.0715357	0.0717132	0.0863812	0.0800465	0.0677006	0.0734037	0.0687162	0.069376	0.00635634	0.0992653	0.0901507	0.0710014	0.00995009	0.0705131	0.0855131	0.0721537	0.0705131	0.0722514	0.0748187	0.0712445	0.0830478	0.0751507	0.0674945	0.0684037	0.0788812	0.0714007	0.0799662	0.0712445	0.0714007	0.0714506	0.0146723	0.083484	0.0826312	0.0662445	0.012207	0.0730218	0.0707562	0.0774944	0.015523	0.00576606	0.0309028	0.0760014	0.0274848	0.00576606	0.0234028	0.0674945	0.0182378	0.0994389	0.0795756
0.00680556	0.0144601	0.0152626	0.0281337	0.0106272	0.00351562	0.0065625	0.0090625	0.00253472	0.0712445	0.0226584	0.0330751	0.00673828	0.0832757	0.00695312	0.0291406	0.0053125	0.00695312	0.00798828	0.00875868	0.00635634	0.0260503	0.00635634	0.00260634	0.009375	0.0231337	0.00260634	0.0178125	0.00635634	0.0143251	0.00851562	0.0566553	0.0146897	0.0243837	0.00526259	0.0836577	0.00680556	0.00782118	0.0126063	0.0503185	0.0411866	0.0729639	0.0104883	0.0675928	0.0411866	0.0679639	0.00260634	0.0563927	0.023457	0.0238281
0.030523	0.0214198	0.0190972	0.0125195	0.0299045	0.0135438	0.0256272	0.0190126	0.0154883	0.0702353	0.037717	0.0200347	0.0217014	0.0802353	0.0238563	0.0152626	0.0260438	0.0238563	0.0279514	0.004273	0.0272222	0.0330751	0.0291753	0.0184722	0.0112001	0.0150195	0.0204253	0.00526259	0.0272222	0.0240625	0.0156272	0.049865	0.040842	0.0259918	0.0141753	0.0738812	0.030523	0.0077105	0.00847222	0.0431983	0.0470525	0.054572	0.0117014	0.0501775	0.0470525	0.057072	0.00847222	0.0438428	0.0542795	0.0351584
0.024707	0.0517757	0.0500781	0.0675543	0.0178125	0.0297938	0.0197418	0.0451063	0.0143251	0.0840287	0.0053125	0.0603906	0.0223003	0.115591	0.0357313	0.0649501	0.0243251	0.0357313	0.0260503	0.0289258	0.0291406	0.076582	0.019375	0.0228906	0.0404188	0.0625543	0.013125	0.0463563	0.0291406	0.0563628	0.0264605	0.0889709	0.024375	0.069082	0.0328125	0.117084	0.024707	0.0254883	0.0228906	0.0617139	0.0564709	0.107662	0.0210503	0.0974084	0.0564709	0.102662	0.0178906	0.0849366	0.0147222	0.0663043
0.0854552	0.0567036	0.051881	0.0443181	0.0785998	0.0623389	0.073615	0.0619483	0.0631983	0.0119293	0.093131	0.0453185	0.0642595	0.0102105	0.0751514	0.0423389	0.0831983	0.0751514	0.0730095	0.0458459	0.0792248	0.0770959	0.0870373	0.0679748	0.0491358	0.0468181	0.0757873	0.0406983	0.0792248	0.0662908	0.0527556	0.00298828	0.0920373	0.0608459	0.0553185	0.00607856	0.0854552	0.0467834	0.0479748	0.00776259	0.0143945	0.00226562	0.0492595	0.000800781	0.0143945	0.00476563	0.0529748	0.00211806	0.119416	0.0655681
0.013457	0.0555257	0.0613281	0.0863043	0.0140625	0.0260438	0.0159918	0.0413563	0.0180751	0.102779	0.0165625	0.0941406	0.0260503	0.134341	0.0244813	0.0912001	0.0130751	0.0244813	0.0223003	0.0401758	0.0178906	0.065332	0.008125	0.0191406	0.0516688	0.0813043	0.009375	0.0651063	0.0178906	0.0526128	0.0377105	0.107721	0.013125	0.065332	0.0365625	0.135834	0.013457	0.0442383	0.0491406	0.0879639	0.0677209	0.133912	0.0398003	0.123658	0.0677209	0.128912	0.0291406	0.103687	0.00347222	0.0625543
0.0892978	0.0717962	0.0707236	0.0712162	0.096609	0.0727093	0.088152	0.0710687	0.0805131	0.00817925	0.11989	0.0804111	0.0825465	0.0052105	0.0792718	0.0727093	0.0860687	0.0792718	0.0862965	0.0721885	0.0843174	0.0792718	0.0921299	0.0780674	0.0670062	0.0687162	0.0858799	0.0698187	0.0843174	0.0719389	0.0772926	0.00743273	0.103797	0.0771885	0.0704111	0.00260634	0.0892978	0.071876	0.0780674	0.0137348	0.011339	0.0154601	0.0800465	0.0139952	0.011339	0.0129601	0.0730674	0.00809028	0.127703	0.0813551
0.0203234	0.0106588	0.0193663	0.0487435	0.0231945	0.0204623	0.0174414	0.0149935	0.0228581	0.102379	0.063507	0.0534288	0.0164844	0.0936295	0.0176498	0.046556	0.0245248	0.0176498	0.0127344	0.0350109	0.0162413	0.0286046	0.026007	0.0174913	0.024056	0.0387435	0.027257	0.0437435	0.0162413	0.0185677	0.0196289	0.0695091	0.021007	0.0211046	0.015382	0.102206	0.0203234	0.0328234	0.0474913	0.090898	0.0660716	0.0896849	0.0327344	0.0891966	0.0660716	0.0796849	0.0274913	0.0823238	0.0525	0.00666018
0.0934298	0.0682574	0.07259	0.0900184	0.0943608	0.0836295	0.0871451	0.0768326	0.0864506	0.0228581	0.129205	0.0910275	0.0808365	0.0108268	0.086442	0.085817	0.0958951	0.086442	0.0820865	0.0874142	0.0877462	0.0900183	0.099465	0.0839962	0.0765201	0.0825184	0.095715	0.0880826	0.0877462	0.0789441	0.0773795	0.0155491	0.0977983	0.0796017	0.0749337	0.0164171	0.0934298	0.0833517	0.0939962	0.0353581	0.0222678	0.0278733	0.0858365	0.0283616	0.0222678	0.0203733	0.0839962	0.0263542	0.132711	0.0698795
0.0292988	0.00742212	0.00322458	0.00941164	0.0286933	0.0143075	0.0218335	0.0120419	0.0139169	0.0698314	0.0463496	0.00603708	0.013103	0.0662377	0.022745	0.00430748	0.0289169	0.022745	0.019353	0.00843942	0.0249433	0.0284394	0.0327558	0.0161933	0.00235435	0.00441164	0.0240058	0.00579185	0.0249433	0.0145093	0.00597414	0.0396173	0.0377558	0.0184394	0.00603708	0.0677307	0.0292988	0.00250192	0.00619333	0.0450166	0.0447736	0.0470197	0.00685305	0.0455548	0.0447736	0.0420197	0.00619333	0.0443721	0.0632593	0.0156616
0.0665627	0.0279283	0.0206057	0.00956621	0.0581838	0.0389933	0.0522225	0.0366495	0.0393058	0.0623071	0.0716213	0.00654321	0.0393904	0.0566821	0.0543058	0.00508705	0.0643058	0.0543058	0.0506404	0.0175002	0.0593557	0.052344	0.0691213	0.0456057	0.018837	0.0120662	0.0553713	0.00789955	0.0593557	0.0400154	0.02441	0.0309414	0.0741213	0.033594	0.0284963	0.0525502	0.0665627	0.0159377	0.0156057	0.0371219	0.0487539	0.0267421	0.0193904	0.0262539	0.0487539	0.0292421	0.0256057	0.0310477	0.105406	0.0383162
0.00407118	0.00758513	0.0102626	0.0274306	0.0135959	0.00125	0.00695312	0.00226562	0.00542535	0.0778069	0.0378147	0.0362001	0.00705078	0.0814007	0.0015625	0.0290625	0.00320312	0.0015625	0.00580078	0.0133681	0.00229384	0.0140972	0.00620009	0.00104384	0.00695312	0.0199306	0.00495009	0.0210156	0.00229384	0.00495009	0.01	0.0560303	0.0145334	0.0161806	0.00229384	0.0836576	0.00407118	0.0118056	0.0210438	0.059381	0.0446241	0.0747608	0.0170508	0.0713428	0.0446241	0.0672608	0.00604384	0.0595959	0.0304883	0.013125
0.0655318	0.0366272	0.0345748	0.0368686	0.0771529	0.047129	0.0653582	0.0422853	0.0541082	0.106338	0.0980904	0.0380123	0.0550261	0.0982129	0.0549415	0.0332228	0.0624415	0.0549415	0.0612761	0.0464693	0.0608248	0.051313	0.0705904	0.0520748	0.0319728	0.0293686	0.0618404	0.0385353	0.0608248	0.0398178	0.0475457	0.0728425	0.0855904	0.052563	0.0399654	0.0982476	0.0655318	0.0374068	0.0420748	0.0781897	0.080655	0.0811433	0.0500261	0.080655	0.080655	0.0736433	0.0420748	0.0771155	0.111042	0.0539519
0.0325195	0.0552132	0.0503906	0.0691168	0.024375	0.0369813	0.0256793	0.0516688	0.0177626	0.0830912	0.00625	0.0538281	0.0251128	0.114029	0.0447938	0.0621376	0.0327626	0.0447938	0.0313628	0.0329883	0.0375781	0.0868945	0.0278125	0.0288281	0.0413563	0.0616168	0.0190625	0.0479188	0.0375781	0.0623003	0.027398	0.0886584	0.0328125	0.0781445	0.03625	0.117397	0.0325195	0.0239258	0.0188281	0.0582764	0.0574084	0.106725	0.0201128	0.0964709	0.0574084	0.0992248	0.0188281	0.0864991	0.0225347	0.0728668
0.0400588	0.0235728	0.0162502	0.0189738	0.0462502	0.0250154	0.0373852	0.0260311	0.0236352	0.0537329	0.050469	0.0121877	0.0274829	0.0573266	0.0353279	0.0128279	0.0369686	0.0353279	0.0362329	0.0193557	0.0382815	0.0434182	0.0421877	0.0270315	0.0107186	0.0114738	0.0309377	0.0147811	0.0382815	0.0264933	0.0204321	0.0365859	0.0571877	0.0421682	0.0182815	0.0573614	0.0400588	0.00779321	0.00703149	0.0277144	0.0351796	0.0453164	0.0174829	0.0418984	0.0351796	0.0378164	0.0120315	0.0379292	0.0709204	0.0435571
0.024707	0.00294754	0.00125	0.0089605	0.0275781	0.0102626	0.0197418	0.00604384	0.0143251	0.0742631	0.0541406	0.0115625	0.0125347	0.0667631	0.0162001	0.00635634	0.0243251	0.0162001	0.0162847	0.00939453	0.019375	0.0179883	0.0291406	0.013125	0.00135634	0.0039605	0.0228906	0.00729384	0.019375	0.00753472	0.00692925	0.0401427	0.0341406	0.0104883	0.00351562	0.0682562	0.024707	0.00595703	0.013125	0.0519483	0.0467052	0.0490685	0.0112847	0.0485802	0.0467052	0.0440685	0.008125	0.0458741	0.0635503	0.0077105
0.0732873	0.0490278	0.0498302	0.0425407	0.0711584	0.0513428	0.065822	0.0496241	0.0604053	0.0175347	0.100221	0.0576427	0.061115	0.0125347	0.0597803	0.0474366	0.0704053	0.0597803	0.064865	0.0429748	0.0654552	0.0565685	0.0752209	0.0592052	0.0474366	0.0475407	0.0689709	0.0408741	0.0654552	0.053615	0.0530095	0.0040625	0.0802209	0.0440685	0.0495959	0.00652778	0.0732873	0.0520373	0.0592052	0.0183681	0.015625	0.00548828	0.054865	0.005	0.015625	0.0104883	0.0542052	0.00229384	0.112131	0.0512907
0.0325195	0.00638504	0.0015625	0.010523	0.0341406	0.0174501	0.0256793	0.0126063	0.0177626	0.0733256	0.0550781	0.005	0.0153472	0.0652006	0.0252626	0.00354384	0.0327626	0.0252626	0.0215972	0.013457	0.0278125	0.0283008	0.0375781	0.0190625	0.00229384	0.003023	0.0288281	0.00885634	0.0278125	0.0134722	0.00786675	0.0398302	0.0425781	0.0195508	0.00695312	0.0685687	0.0325195	0.00439453	0.0090625	0.0485108	0.0476427	0.048131	0.0103472	0.0476427	0.0476427	0.040631	0.0090625	0.0474366	0.0713628	0.014273
0.054707	0.0204475	0.01625	0.0039605	0.0475781	0.0277626	0.0422418	0.0260438	0.0318251	0.0792631	0.0666406	0.0090625	0.0325347	0.0742631	0.0412001	0.00385634	0.0518251	0.0412001	0.0412847	0.00939453	0.046875	0.0379883	0.0566406	0.035625	0.0138563	0.0089605	0.0453906	0.00229384	0.046875	0.0300347	0.0194293	0.0426427	0.0616406	0.0204883	0.0210156	0.0682562	0.054707	0.013457	0.015625	0.0519483	0.0592052	0.0390685	0.0162847	0.0385802	0.0592052	0.0440685	0.020625	0.0408741	0.0935503	0.0277105
0.0015625	0.0148421	0.0175195	0.0388628	0.00580078	0.00375868	0.00222222	0.00868056	0.00180556	0.0772514	0.022207	0.043457	0.004273	0.0886576	0.00407118	0.0393837	0.00180556	0.00407118	0.003023	0.0147656	0.00173828	0.0266406	0.00173828	0.000488281	0.0133681	0.0313628	0.000488281	0.0274306	0.00173828	0.0144293	0.00917535	0.0632873	0.00673828	0.0253906	0.00564453	0.0920257	0.0015625	0.0132031	0.0204883	0.0599366	0.0440685	0.0839709	0.014273	0.0785998	0.0440685	0.0764709	0.00548828	0.0660108	0.0159918	0.0201128
0.0603185	0.0530903	0.0488927	0.0580095	0.0567834	0.0511866	0.0528532	0.0547803	0.0449366	0.00347222	0.0627209	0.0517052	0.0470525	0.0115972	0.0596241	0.0529053	0.0599366	0.0596241	0.0533025	0.0453185	0.0588927	0.0770373	0.0608459	0.0501427	0.0450928	0.0530095	0.0520959	0.0485303	0.0588927	0.0601775	0.0428532	0.008125	0.0658459	0.0670373	0.0458459	0.0130903	0.0603185	0.039381	0.0401427	0.00180556	0.0015625	0.018457	0.0408025	0.0140625	0.0015625	0.013457	0.0401427	0.00995009	0.0796306	0.0642595
0.0147418	0.00860726	0.0137847	0.0371897	0.0196962	0.0118945	0.013457	0.00705078	0.0177626	0.0955478	0.0606337	0.0472222	0.013125	0.0874228	0.00970703	0.0379883	0.017207	0.00970703	0.009375	0.0256793	0.0100347	0.0171897	0.0198003	0.0112847	0.0167383	0.0296897	0.0210503	0.0333008	0.0100347	0.0101389	0.0156445	0.0620525	0.0181337	0.011773	0.00917535	0.0930131	0.0147418	0.0266168	0.0412847	0.0829552	0.059865	0.0803532	0.028125	0.079865	0.059865	0.0728532	0.0212847	0.071881	0.0491406	0.00205078
0.0560438	0.0151437	0.00782118	0.0101063	0.0604514	0.033457	0.0489258	0.024707	0.037398	0.0848968	0.0842014	0.00375868	0.0341406	0.0689593	0.0437695	0.00173828	0.0551758	0.0437695	0.0428906	0.0255751	0.0493837	0.036773	0.0630556	0.0381337	0.00939453	0.00260634	0.0518056	0.013457	0.0493837	0.0225087	0.022207	0.0435889	0.0713889	0.0288563	0.0196181	0.0712162	0.0560438	0.0140126	0.0181337	0.0564709	0.0617139	0.0474366	0.0241406	0.0489014	0.0617139	0.0399366	0.0231337	0.0520373	0.106875	0.0258008
0.00260634	0.0220187	0.0234462	0.0510438	0.0117014	0.00939453	0.00673828	0.0150195	0.0052105	0.0817718	0.0229514	0.0506337	0.00851562	0.0958343	0.00845703	0.0489258	0.00298828	0.00845703	0.00726563	0.0252626	0.00500868	0.0352105	0.00305556	0.00375868	0.018457	0.0385438	0.00180556	0.0387695	0.00500868	0.0193837	0.0156445	0.0729639	0.0113889	0.0397938	0.0108681	0.101841	0.00260634	0.0174501	0.0237587	0.0633459	0.0473389	0.0983741	0.0210156	0.0920264	0.0473389	0.0858741	0.00875868	0.0773498	0.014375	0.0317383
0.0827816	0.063405	0.0642074	0.0467834	0.0963428	0.0572348	0.0864275	0.0574691	0.0754552	0.0280056	0.121499	0.0720199	0.082697	0.0269119	0.0656723	0.0572348	0.0743441	0.0656723	0.086447	0.0544223	0.0759262	0.0552556	0.0837387	0.0696762	0.0552816	0.0517834	0.0774887	0.0487191	0.0759262	0.056881	0.0755681	0.0184397	0.105405	0.0594223	0.0620199	0.0153494	0.0827816	0.0634848	0.0696762	0.0232834	0.0260959	0.020842	0.076447	0.0193772	0.0260959	0.025842	0.0646762	0.0101389	0.127853	0.0777556
0.00226562	0.0107796	0.015957	0.0378472	0.010957	0.00305556	0.00542535	0.00407118	0.00750868	0.0860014	0.0401758	0.0493945	0.008023	0.0895952	0.000868056	0.0408681	0.00250868	0.000868056	0.004273	0.0190625	0.000488281	0.015625	0.00439453	0.00173828	0.0137587	0.0303472	0.00564453	0.0303212	0.000488281	0.00786675	0.0134722	0.0642248	0.00939453	0.016875	0.00548828	0.0929632	0.00226562	0.02	0.0317383	0.0711866	0.0503185	0.0854552	0.023023	0.0820373	0.0503185	0.0779552	0.0117383	0.0689014	0.0264605	0.0115972
0.0237695	0.00263504	0.0003125	0.011773	0.0278906	0.0112001	0.0194293	0.00635634	0.0140126	0.0745756	0.0538281	0.01125	0.0115972	0.0664506	0.0165126	0.00729384	0.0240126	0.0165126	0.0153472	0.012207	0.0190625	0.0195508	0.0288281	0.0128125	0.00104384	0.004273	0.0225781	0.0101063	0.0190625	0.00722222	0.00661675	0.0410802	0.0338281	0.0133008	0.00320312	0.0698187	0.0237695	0.00564453	0.0128125	0.0522608	0.0463927	0.051881	0.0115972	0.0513927	0.0463927	0.044381	0.0078125	0.0486866	0.0626128	0.008023
0.0125195	0.00638504	0.0115625	0.030523	0.0241406	0.00745009	0.0156793	0.00260634	0.0177626	0.0933256	0.0650781	0.045	0.0153472	0.0852006	0.00526259	0.0335438	0.0127626	0.00526259	0.0115972	0.023457	0.0078125	0.00830078	0.0175781	0.0090625	0.0122938	0.023023	0.0188281	0.0288563	0.0078125	0.00347222	0.0178668	0.0598302	0.0225781	0.00955078	0.00695312	0.0885687	0.0125195	0.0243945	0.0390625	0.0785108	0.0576427	0.078131	0.0303472	0.0776427	0.0576427	0.070631	0.0190625	0.0674366	0.0513628	0.004273
0.0300781	0.00343582	0.00173828	0.00847222	0.0339258	0.0136806	0.0251128	0.00750868	0.0196962	0.0786576	0.0643945	0.0120508	0.0169293	0.0672514	0.0196181	0.00586806	0.0296962	0.0196181	0.0206793	0.0128125	0.0237695	0.0175	0.0354883	0.0175195	0.00282118	0.00347222	0.0292383	0.00875868	0.0237695	0.008023	0.0103472	0.040631	0.0404883	0.01	0.00595703	0.0687445	0.0300781	0.009375	0.0175195	0.0563428	0.0510998	0.0485802	0.0156793	0.0490685	0.0510998	0.0435802	0.0125195	0.0473389	0.0738043	0.00722222
0.0877209	0.0517036	0.044381	0.049865	0.0878185	0.0681983	0.0783806	0.0614014	0.0679639	0.0172418	0.107662	0.0403185	0.064572	0.0052105	0.0785108	0.0403858	0.0879639	0.0785108	0.073322	0.0592052	0.0820373	0.0776427	0.093756	0.0707873	0.0460889	0.042365	0.082506	0.0501514	0.0820373	0.0612907	0.053615	0.00298828	0.098756	0.0663927	0.0542248	0.00857856	0.0877209	0.0476427	0.0507873	0.0130751	0.017207	0.0078125	0.054572	0.00830078	0.017207	0.0003125	0.0557873	0.0115712	0.131447	0.061115
0.0877209	0.0517036	0.044381	0.049865	0.0878185	0.0681983	0.0783806	0.0614014	0.0679639	0.0172418	0.107662	0.0403185	0.064572	0.0052105	0.0785108	0.0403858	0.0879639	0.0785108	0.073322	0.0592052	0.0820373	0.0776427	0.093756	0.0707873	0.0460889	0.042365	0.082506	0.0501514	0.0820373	0.0612907	0.053615	0.00298828	0.098756	0.0663927	0.0542248	0.00857856	0.0877209	0.0476427	0.0507873	0.0130751	0.017207	0.0078125	0.054572	0.00830078	0.017207	0.0003125	0.0557873	0.0115712	0.131447	0.061115
0.0120508	0.0104475	0.008125	0.0234918	0.0122656	0.00729384	0.0077105	0.0102626	0.00229384	0.0667631	0.0225781	0.0190625	0.00378472	0.0742631	0.0126063	0.0190126	0.0122938	0.0126063	0.00753472	0.00830078	0.01125	0.0312695	0.0132031	0.005	0.00495009	0.0159918	0.00695312	0.0140126	0.01125	0.0150347	0.0027105	0.0488927	0.0182031	0.0250195	0.00320312	0.0776312	0.0120508	0.00173828	0.005	0.0444483	0.0385802	0.0635998	0.00378472	0.0592052	0.0385802	0.0560998	0	0.0525928	0.0313628	0.0197418
0.0877209	0.0517036	0.044381	0.049865	0.0878185	0.0681983	0.0783806	0.0614014	0.0679639	0.0172418	0.107662	0.0403185	0.064572	0.0052105	0.0785108	0.0403858	0.0879639	0.0785108	0.073322	0.0592052	0.0820373	0.0776427	0.093756	0.0707873	0.0460889	0.042365	0.082506	0.0501514	0.0820373	0.0612907	0.053615	0.00298828	0.098756	0.0663927	0.0542248	0.00857856	0.0877209	0.0476427	0.0507873	0.0130751	0.017207	0.0078125	0.054572	0.00830078	0.017207	0.0003125	0.0557873	0.0115712	0.131447	0.061115
0.0125195	0.00638504	0.0115625	0.030523	0.0241406	0.00745009	0.0156793	0.00260634	0.0177626	0.0933256	0.0650781	0.045	0.0153472	0.0852006	0.00526259	0.0335438	0.0127626	0.00526259	0.0115972	0.023457	0.0078125	0.00830078	0.0175781	0.0090625	0.0122938	0.023023	0.0188281	0.0288563	0.0078125	0.00347222	0.0178668	0.0598302	0.0225781	0.00955078	0.00695312	0.0885687	0.0125195	0.0243945	0.0390625	0.0785108	0.0576427	0.078131	0.0303472	0.0776427	0.0576427	0.070631	0.0190625	0.0674366	0.0513628	0.004273
0.0877209	0.0517036	0.044381	0.049865	0.0878185	0.0681983	0.0783806	0.0614014	0.0679639	0.0172418	0.107662	0.0403185	0.064572	0.0052105	0.0785108	0.0403858	0.0879639	0.0785108	0.073322	0.0592052	0.0820373	0.0776427	0.093756	0.0707873	0.0460889	0.042365	0.082506	0.0501514	0.0820373	0.0612907	0.053615	0.00298828	0.098756	0.0663927	0.0542248	0.00857856	0.0877209	0.0476427	0.0507873	0.0130751	0.017207	0.0078125	0.054572	0.00830078	0.017207	0.0003125	0.0557873	0.0115712	0.131447	0.061115
0.053615	0.0429883	0.0425407	0.0656723	0.0538428	0.0495959	0.0479552	0.0460802	0.0472608	0.016339	0.0802491	0.0616032	0.0429748	0.0114952	0.0517834	0.0595959	0.0567052	0.0517834	0.0442248	0.0552556	0.0505095	0.0644223	0.058322	0.0467595	0.0451427	0.0556723	0.054572	0.0598302	0.0505095	0.0495199	0.0420959	0.010523	0.0566553	0.0552556	0.0416032	0.0189605	0.053615	0.0480681	0.0567595	0.0218945	0.00817925	0.0266753	0.0492248	0.0252105	0.00817925	0.0166753	0.0467595	0.02125	0.083131	0.0430334
0.120194	0.0787714	0.076854	0.074838	0.117792	0.0969213	0.109604	0.0913744	0.0991869	0.0171222	0.138885	0.0715415	0.097045	0.00634092	0.108484	0.0691088	0.119187	0.108484	0.105795	0.0841783	0.11326	0.105116	0.124979	0.10201	0.0773119	0.072338	0.113729	0.0751244	0.11326	0.0925138	0.084838	0.00856314	0.129979	0.0913658	0.0854478	0.00595898	0.120194	0.0788658	0.0820103	0.0198999	0.0252819	0.00963736	0.084545	0.0101256	0.0252819	0.00713736	0.0870103	0.013396	0.16392	0.091088
0.0147418	0.00860726	0.0137847	0.0371897	0.0196962	0.0118945	0.013457	0.00705078	0.0177626	0.0955478	0.0606337	0.0472222	0.013125	0.0874228	0.00970703	0.0379883	0.017207	0.00970703	0.009375	0.0256793	0.0100347	0.0171897	0.0198003	0.0112847	0.0167383	0.0296897	0.0210503	0.0333008	0.0100347	0.0101389	0.0156445	0.0620525	0.0181337	0.011773	0.00917535	0.0930131	0.0147418	0.0266168	0.0412847	0.0829552	0.059865	0.0803532	0.028125	0.079865	0.059865	0.0728532	0.0212847	0.071881	0.0491406	0.00205078
0.0343888	0.00571856	0.0086661	0.0251179	0.0362963	0.0226353	0.028104	0.0138853	0.0274096	0.07318	0.0750463	0.0271036	0.0208189	0.0572425	0.0254478	0.0209165	0.036854	0.0254478	0.0220689	0.02642	0.0277286	0.0251179	0.0414005	0.0239786	0.0135728	0.0176179	0.0376505	0.0251353	0.0277286	0.0150203	0.0163853	0.0365017	0.0397338	0.0147013	0.012963	0.0628328	0.0343888	0.0223575	0.0339786	0.060217	0.0471267	0.0478494	0.0258189	0.0493142	0.0471267	0.0403494	0.0239786	0.0482834	0.0785533	0.00497903
0.0153472	0.00409555	0.004273	0.0236545	0.0143251	0.00945312	0.0090625	0.0065625	0.00836806	0.0771299	0.0413563	0.0227105	0.00470703	0.0729111	0.0122656	0.0194531	0.0178125	0.0122656	0.00595703	0.0132378	0.0116168	0.0236545	0.0194293	0.00786675	0.00625	0.0161545	0.0156793	0.0178125	0.0116168	0.0106272	0.00320312	0.0475407	0.0177626	0.0132378	0.0027105	0.0785014	0.0153472	0.00917535	0.0178668	0.0595373	0.046447	0.0618181	0.00970703	0.0603532	0.046447	0.0543181	0.00786675	0.0563927	0.0448633	0.00351562
0.108708	0.0722852	0.0728677	0.0733517	0.108805	0.087935	0.100617	0.0823881	0.0927006	0.0156359	0.134899	0.0750552	0.0905587	0.00485462	0.0969975	0.0701225	0.107701	0.0969975	0.0968087	0.080192	0.101774	0.0936295	0.113493	0.093024	0.0733256	0.0708517	0.104743	0.0736381	0.101774	0.0835275	0.0808517	0.00707685	0.118493	0.0823795	0.0789615	0.00447268	0.108708	0.0773795	0.083024	0.0209137	0.0212956	0.0106511	0.0830587	0.0111393	0.0212956	0.00815107	0.083024	0.0119097	0.152434	0.0821017
0.0115972	0.00534555	0.008023	0.0299045	0.0130751	0.00820312	0.0078125	0.0053125	0.00961806	0.0833799	0.0451063	0.0339605	0.00595703	0.0791611	0.00851562	0.0282031	0.0140625	0.00851562	0.00470703	0.0169878	0.00786675	0.0199045	0.0156793	0.00661675	0.01	0.0224045	0.0144293	0.0240625	0.00786675	0.00937717	0.00695312	0.0537907	0.0140126	0.0119878	0.0039605	0.0847514	0.0115972	0.0154253	0.0266168	0.0682873	0.050197	0.0705681	0.015957	0.0691032	0.050197	0.0630681	0.0116168	0.0626427	0.0411133	0.00226562
0.0849424	0.0688079	0.0689853	0.0785014	0.0982301	0.0726507	0.0875465	0.067807	0.0824076	0.0153472	0.129168	0.0874228	0.0822145	0.00722222	0.0754632	0.0787444	0.0829632	0.0754632	0.0834645	0.0808799	0.0802353	0.074057	0.090001	0.0764853	0.0674945	0.0710014	0.086251	0.079057	0.0802353	0.0664506	0.079734	0.0119444	0.101668	0.0769736	0.069376	0.00836806	0.0849424	0.0768174	0.0864853	0.0234028	0.0147569	0.0252452	0.0872145	0.0247569	0.0147569	0.0177452	0.0764853	0.0173286	0.12823	0.0761403
0.0187695	0.00763504	0.0103125	0.0334397	0.0178906	0.0145334	0.0127626	0.00968967	0.0156793	0.0895756	0.0538281	0.03625	0.00993055	0.0814506	0.0148459	0.0306272	0.0223459	0.0148459	0.00868056	0.022207	0.0140625	0.0245508	0.0238281	0.0128125	0.0143772	0.0259397	0.0225781	0.0284397	0.0140625	0.0138889	0.00995009	0.0560802	0.0188281	0.0133008	0.00820312	0.088152	0.0187695	0.0206445	0.0328125	0.0755941	0.0563927	0.071881	0.0199306	0.0713927	0.0563927	0.064381	0.0178125	0.0670199	0.0509462	0.00135634
0.0386268	0.00847222	0.00766976	0.00468582	0.0444146	0.0175851	0.034981	0.0139914	0.0248421	0.0769329	0.0666021	0.00985726	0.0258989	0.0700579	0.0266476	0.00367888	0.0353976	0.0266476	0.0321489	0.0120643	0.0326698	0.0227414	0.0424354	0.0239198	0.00492888	0.00218582	0.0336854	0.00524138	0.0326698	0.013885	0.0171685	0.0421875	0.0541021	0.018158	0.0118104	0.0674537	0.0386268	0.00925179	0.0139198	0.0498958	0.0525	0.0467383	0.0183989	0.04625	0.0525	0.0442383	0.0139198	0.0438216	0.0819146	0.0223247
0.0122656	0.0107796	0.010957	0.0345139	0.00595703	0.0113889	0.00375868	0.0124045	0.00417535	0.0760014	0.0251758	0.0293945	0.00135634	0.0795951	0.0142014	0.0292014	0.015842	0.0142014	0.00260634	0.0140625	0.0104883	0.035625	0.0143945	0.00673828	0.012092	0.0270139	0.0106445	0.0236545	0.0104883	0.0195334	0.00180556	0.0542248	0.00939453	0.021875	0.00548828	0.0862965	0.0122656	0.01	0.0167383	0.0595199	0.0453185	0.0704552	0.00635634	0.0670373	0.0453185	0.0629552	0.00673828	0.0622348	0.0297938	0.00993055
0.0157378	0.00925179	0.00692925	0.0257639	0.0102626	0.01125	0.00695312	0.0122656	0.00375868	0.0694736	0.0244813	0.0178668	0.00205078	0.0730674	0.0165625	0.0190625	0.0182031	0.0165625	0.00580078	0.0100347	0.0139605	0.0357639	0.0178668	0.0077105	0.00695312	0.0182639	0.0116168	0.0160156	0.0139605	0.0182834	0	0.047697	0.0162001	0.0228472	0.0039605	0.0786576	0.0157378	0.00347222	0.0077105	0.049381	0.0412907	0.0614275	0.00205078	0.0580095	0.0412907	0.0539275	0.0027105	0.0545959	0.0354883	0.013125
0.0108008	0.0141975	0.014375	0.0389084	0.00351562	0.0118772	0.00229384	0.0148459	0.0027105	0.0755131	0.0188281	0.0328125	0.000868056	0.0830131	0.0146897	0.0335959	0.0143772	0.0146897	0.00211806	0.0145508	0.01	0.0400195	0.0119531	0.00625	0.0145334	0.0314084	0.00820312	0.0260959	0.01	0.0229514	0.00229384	0.0576427	0.00695312	0.0262695	0.00695312	0.0897145	0.0108008	0.0104883	0.01625	0.0590316	0.0448302	0.0748498	0.00586806	0.0704552	0.0448302	0.0673498	0.00625	0.0646762	0.0234462	0.0143251
0.037092	0.024981	0.0207834	0.0178125	0.0512001	0.0204514	0.0407378	0.022092	0.0272656	0.0795778	0.0610438	0.0235959	0.0339605	0.0837965	0.0288889	0.0182639	0.0311545	0.0288889	0.0402105	0.0201389	0.0346897	0.0312847	0.0385959	0.0259397	0.0124045	0.0128125	0.0298459	0.015842	0.0346897	0.020957	0.0287847	0.0571762	0.0602626	0.0379514	0.0196897	0.079734	0.037092	0.0142014	0.0159397	0.0492074	0.0545199	0.0665316	0.0277105	0.0631137	0.0545199	0.0615316	0.0159397	0.0544223	0.072398	0.0462847
0.0052105	0.0227479	0.0260503	0.0490647	0.000555556	0.00970703	0.000800781	0.017207	0.00260634	0.080626	0.0136806	0.0513628	0.00445312	0.0965635	0.0106445	0.0492383	0.00705078	0.0106445	0.00320312	0.0166168	0.00573785	0.0403147	0.00378472	0.00448785	0.0225195	0.0440647	0.00253472	0.033457	0.00573785	0.0267795	0.00970703	0.0699431	0.00211806	0.031148	0.0115972	0.100279	0.0052105	0.0181793	0.0244878	0.0655334	0.0480681	0.0897283	0.0132031	0.0833806	0.0480681	0.0847283	0.00948785	0.0720373	0.0103125	0.0239258
0.0552286	0.0158162	0.0118888	0.0180671	0.0474096	0.0360533	0.0408189	0.0298814	0.0326244	0.0637464	0.0678783	0.00720126	0.0276353	0.0523401	0.0469908	0.00824075	0.0570689	0.0469908	0.0363853	0.022963	0.04892	0.0493171	0.0606388	0.03767	0.0151939	0.0130671	0.0493888	0.0161314	0.04892	0.0326179	0.0160533	0.0303494	0.0589721	0.0301505	0.0211075	0.0560554	0.0552286	0.0145255	0.01767	0.0432834	0.0458182	0.0332986	0.0163853	0.0337869	0.0458182	0.0282986	0.02267	0.0392795	0.0945103	0.0229283
0.00294754	0.013457	0.0189046	0.0402479	0.00718582	0.00514372	0.00360726	0.0100656	0.0031906	0.0786364	0.0235921	0.0448421	0.00565805	0.0900427	0.00545622	0.0407687	0.0031906	0.00545622	0.00440805	0.0161507	0.00312332	0.0280257	0.00312332	0.00187332	0.0147531	0.0327479	0.00187332	0.0288156	0.00312332	0.0158143	0.0105604	0.0646723	0.00812332	0.0267757	0.00702957	0.0934107	0.00294754	0.0145882	0.0218733	0.0613216	0.0454536	0.0853559	0.015658	0.0799848	0.0454536	0.0778559	0.00687332	0.0673958	0.0173768	0.0214979
0.0466476	0.0121181	0.0081906	0.00867888	0.0478521	0.0260921	0.0389046	0.0218733	0.0273768	0.0762037	0.0644146	0.0035031	0.0266975	0.0687037	0.0370296	0.00218582	0.0451546	0.0370296	0.0354475	0.0163351	0.0413156	0.0365955	0.0510812	0.0300656	0.00718582	0.00367888	0.0398312	0.00812332	0.0413156	0.0222531	0.0160921	0.0420833	0.0594146	0.0274289	0.0154562	0.0690857	0.0466476	0.00789763	0.0100656	0.0477778	0.0536458	0.0460091	0.0154475	0.0455208	0.0536458	0.0410091	0.0150656	0.0467036	0.0877132	0.0268733
0.023023	0.0164198	0.0115972	0.0289084	0.0140712	0.0179883	0.0117383	0.020957	0.00604384	0.0677353	0.0193837	0.0150347	0.0053125	0.0752353	0.0258008	0.019707	0.0254883	0.0258008	0.0115625	0.011773	0.0222222	0.0489084	0.0241753	0.0134722	0.0106445	0.0214084	0.0154253	0.017207	0.0222222	0.0279514	0.00173828	0.049865	0.0225087	0.0334918	0.00917535	0.0808256	0.023023	0.0027105	0.00347222	0.0451427	0.0420525	0.062072	0.0003125	0.0576775	0.0420525	0.054572	0.00347222	0.0557873	0.0378906	0.0237695
0.0244878	0.0130018	0.00817925	0.015625	0.0298459	0.0130556	0.022092	0.0140712	0.0119531	0.0682236	0.0390647	0.0116168	0.0146897	0.0718174	0.0208681	0.0108681	0.0225087	0.0208681	0.0209397	0.0112847	0.0227105	0.0311806	0.0266168	0.0139605	0.00375868	0.008125	0.0178668	0.0103212	0.0227105	0.0156445	0.0101389	0.046447	0.0382834	0.0290972	0.0077105	0.0729632	0.0244878	0.00222222	0.0039605	0.0411866	0.0425407	0.0576775	0.00968967	0.0542595	0.0425407	0.0501775	0.0039605	0.0489014	0.0531272	0.0282639
0.00456621	0.017963	0.0231404	0.0504516	0.00561439	0.00953149	0.00328149	0.0125002	0.00758705	0.0692168	0.0309269	0.0565779	0.00685571	0.0767168	0.00734399	0.0512502	0.00703149	0.00734399	0.00310571	0.0233162	0.00376543	0.0304516	0.00571856	0.00501543	0.0221877	0.0429516	0.00696856	0.0387502	0.00376543	0.0194946	0.0132815	0.0559761	0.00405189	0.025035	0.0107186	0.0823071	0.00456621	0.0242537	0.0350154	0.0612539	0.0381636	0.0781831	0.0218557	0.0737886	0.0381636	0.0706831	0.0150154	0.0618984	0.0194338	0.0153127
0.0938428	0.0595833	0.0553858	0.0408741	0.0900473	0.0657873	0.0835998	0.0640685	0.072072	0.0180903	0.10911	0.0481983	0.0738927	0.0130903	0.0792248	0.041881	0.0898498	0.0792248	0.0826427	0.0485303	0.0860108	0.0737907	0.0957764	0.0747608	0.051881	0.0458741	0.0845264	0.0403185	0.0860108	0.0669483	0.0607873	0.00461806	0.10411	0.0596241	0.0601514	0.00597222	0.0938428	0.0525928	0.0547608	0.0128125	0.0211806	0.00104384	0.0576427	0.000555556	0.0211806	0.00604384	0.0597608	0.00173828	0.134908	0.0690685
0.0125195	0.0564632	0.0603906	0.0966168	0.016875	0.0307313	0.0169293	0.0441688	0.0190126	0.105591	0.0175	0.0950781	0.0251128	0.135279	0.0272938	0.0958876	0.0140126	0.0272938	0.0213628	0.0504883	0.0188281	0.0718945	0.0090625	0.0200781	0.0526063	0.0841167	0.0103125	0.0754188	0.0188281	0.0535503	0.038648	0.112408	0.0140625	0.0756445	0.0375	0.142397	0.0125195	0.0451758	0.0500781	0.0907764	0.0686584	0.144225	0.0426128	0.133971	0.0686584	0.131725	0.0300781	0.113999	0.00253472	0.0653668
0.00753472	0.0158143	0.0159918	0.0303906	0.0159397	0.00500868	0.0101389	0.00993055	0.005	0.0732236	0.0273459	0.0344293	0.00968967	0.0846299	0.00782118	0.0306337	0.00555556	0.00782118	0.0109397	0.0132378	0.0077105	0.0259462	0.0077105	0.0039605	0.00961806	0.0228906	0.0039605	0.0211806	0.0077105	0.013457	0.012092	0.0592595	0.0193772	0.0288628	0.00661675	0.0857757	0.00753472	0.00917535	0.0139605	0.0511866	0.0425407	0.0774431	0.0146897	0.072072	0.0425407	0.0699431	0.0039605	0.0597608	0.0264084	0.0280295
0.00351562	0.00702957	0.00970703	0.0290972	0.00970703	0.00180556	0.00417535	0.00282118	0.00375868	0.0772514	0.0339258	0.0356445	0.004273	0.0808451	0.00211806	0.0296181	0.00375868	0.00211806	0.003023	0.0128125	0.00173828	0.016875	0.00564453	0.000488281	0.00750868	0.0215972	0.00439453	0.0215712	0.00173828	0.00661675	0.00722222	0.0554748	0.0106445	0.015625	0.00173828	0.0842132	0.00351562	0.01125	0.0204883	0.0599366	0.0440685	0.0742052	0.014273	0.0707873	0.0440685	0.0667052	0.00548828	0.0601514	0.0277105	0.0103472
0.0510503	0.016908	0.0152105	0	0.0540647	0.0224306	0.0455295	0.0187587	0.0353906	0.0846299	0.0820334	0.015523	0.0373459	0.0757236	0.0333681	0.00461806	0.0459462	0.0333681	0.0435959	0.0112847	0.0422418	0.0218056	0.0539605	0.0334918	0.0115712	0.005	0.0452105	0.00250868	0.0422418	0.0195508	0.0257639	0.0441032	0.0656272	0.0134722	0.0194293	0.0674945	0.0510503	0.0178472	0.0234918	0.0575928	0.062072	0.0420525	0.0260959	0.0425407	0.062072	0.0470525	0.0234918	0.0410889	0.0992209	0.0251389
0.0110156	0.0120296	0.017207	0.0215972	0.012207	0.00180556	0.00917535	0.00532118	0.00875868	0.0797514	0.0389258	0.0406445	0.011773	0.0858452	0.00461806	0.0296181	0.00875868	0.00461806	0.010523	0.0053125	0.00673828	0.014375	0.0106445	0.00548828	0.0125087	0.0240972	0.00939453	0.0140712	0.00673828	0.0116168	0.0122222	0.0554748	0.0156445	0.008125	0.00673828	0.0817132	0.0110156	0.01625	0.0254883	0.0624366	0.0490685	0.0667052	0.016773	0.0632873	0.0490685	0.0692052	0.0104883	0.0526514	0.0352105	0.0128472
0.0187587	0.0141476	0.0174501	0.0133681	0.0195334	0.0040625	0.0160156	0.00820312	0.0119878	0.0762445	0.0418772	0.0327626	0.0167383	0.0829632	0.01	0.021875	0.0147656	0.01	0.0179883	0.00180556	0.0138563	0.0162847	0.0177626	0.0101063	0.0110156	0.0183681	0.0140126	0.00695312	0.0138563	0.0140126	0.0140625	0.0513428	0.0260959	0.00961806	0.00885634	0.0758452	0.0187587	0.0133681	0.0201063	0.0553185	0.0486866	0.0581983	0.0154883	0.0547803	0.0486866	0.0631983	0.0101063	0.0455334	0.0451758	0.0190625
0.00205078	0.0104475	0.013125	0.0334918	0.00726563	0.00229384	0.0027105	0.00526259	0.00229384	0.0767631	0.0275781	0.0390625	0.00378472	0.0842631	0.00260634	0.0340126	0.00229384	0.00260634	0.00253472	0.0133008	0.00125	0.0212695	0.00320312	0	0.00995009	0.0259918	0.00195312	0.0240126	0.00125	0.0100347	0.0077105	0.0588927	0.00820312	0.0200195	0.00320312	0.0876312	0.00205078	0.0117383	0.02	0.0594483	0.0435802	0.0785998	0.0137847	0.0742052	0.0435802	0.0710998	0.005	0.0625928	0.0213628	0.0147418
0.0848498	0.0524653	0.0463927	0.0453532	0.0814709	0.0635303	0.0742595	0.0599366	0.0638428	0.0128472	0.0986584	0.0410802	0.0626775	0.00597222	0.0750928	0.0396241	0.0838428	0.0750928	0.0714275	0.0507873	0.0788927	0.075631	0.0886584	0.0676427	0.0458741	0.0428532	0.0774084	0.0436866	0.0788927	0.0620525	0.051447	0.00125	0.0936584	0.061881	0.0530334	0.00559028	0.0848498	0.0454748	0.0476427	0.00868056	0.0140625	0.00330078	0.0501775	0.0028125	0.0140625	0.000800781	0.0526427	0.00510634	0.123693	0.0616032
0.00351562	0.00702957	0.00970703	0.0290972	0.00970703	0.00180556	0.00417535	0.00282118	0.00375868	0.0772514	0.0339258	0.0356445	0.004273	0.0808451	0.00211806	0.0296181	0.00375868	0.00211806	0.003023	0.0128125	0.00173828	0.016875	0.00564453	0.000488281	0.00750868	0.0215972	0.00439453	0.0215712	0.00173828	0.00661675	0.00722222	0.0554748	0.0106445	0.015625	0.00173828	0.0842132	0.00351562	0.01125	0.0204883	0.0599366	0.0440685	0.0742052	0.014273	0.0707873	0.0440685	0.0667052	0.00548828	0.0601514	0.0277105	0.0103472
0.0693177	0.0431832	0.0383607	0.0450989	0.0742721	0.0531371	0.0646996	0.0482934	0.0556719	0.110124	0.0952096	0.0417982	0.0543676	0.101999	0.0609496	0.0392309	0.0684496	0.0609496	0.0606176	0.0502552	0.0646107	0.0617656	0.0743763	0.0558607	0.0379809	0.0375989	0.0656263	0.0445434	0.0646107	0.0480482	0.0468871	0.0766284	0.0827096	0.0563489	0.0437513	0.104256	0.0693177	0.0411927	0.0458607	0.0841978	0.0844409	0.0849292	0.0493676	0.0844409	0.0844409	0.0774292	0.0458607	0.0831236	0.110383	0.0532934
0.00580078	0.00919754	0.009375	0.0272418	0.00851562	0.00354384	0.0039605	0.00651259	0.00104384	0.0705131	0.0238281	0.0278125	0.00253472	0.0780131	0.00635634	0.0252626	0.00604384	0.00635634	0.00378472	0.00955078	0.005	0.0250195	0.00695312	0.00125	0.00620009	0.0197418	0.00320312	0.0177626	0.005	0.0112847	0.0039605	0.0526427	0.0119531	0.0212695	0.00195312	0.0813812	0.00580078	0.00548828	0.01125	0.0506983	0.0398302	0.0698498	0.00753472	0.0654552	0.0398302	0.0623498	0.00125	0.0563428	0.0251128	0.0159918
0.0329883	0.02076	0.0140625	0.0206793	0.0269531	0.0213563	0.023023	0.0249501	0.0126063	0.0664506	0.0278906	0.009375	0.0147222	0.0745756	0.0322938	0.0130751	0.0326063	0.0322938	0.0234722	0.0104883	0.0315625	0.049707	0.0335156	0.0203125	0.0102626	0.0156793	0.0222656	0.0112001	0.0315625	0.0303472	0.008023	0.0479552	0.0385156	0.037207	0.0135156	0.0760687	0.0329883	0.00205078	0.0003125	0.0391358	0.0438927	0.0557873	0.00347222	0.0513927	0.0438927	0.0507873	0.0053125	0.0497803	0.0523003	0.0344293
0.0147418	0.00860726	0.0137847	0.0371897	0.0196962	0.0118945	0.013457	0.00705078	0.0177626	0.0955478	0.0606337	0.0472222	0.013125	0.0874228	0.00970703	0.0379883	0.017207	0.00970703	0.009375	0.0256793	0.0100347	0.0171897	0.0198003	0.0112847	0.0167383	0.0296897	0.0210503	0.0333008	0.0100347	0.0101389	0.0156445	0.0620525	0.0181337	0.011773	0.00917535	0.0930131	0.0147418	0.0266168	0.0412847	0.0829552	0.059865	0.0803532	0.028125	0.079865	0.059865	0.0728532	0.0212847	0.071881	0.0491406	0.00205078
0.0191406	0.00312332	0.00580078	0.0212847	0.0292383	0.00961806	0.0198003	0.00282118	0.0193837	0.0889701	0.069082	0.0317383	0.0159918	0.0769389	0.00993055	0.0218056	0.0193837	0.00993055	0.0147418	0.020625	0.013457	0.0090625	0.0251758	0.012207	0.00750868	0.0137847	0.0239258	0.0215712	0.013457	0.0027105	0.0150347	0.0515685	0.0301758	0.0078125	0.00564453	0.0803069	0.0191406	0.0190625	0.032207	0.0716553	0.0557873	0.0663927	0.0259918	0.066881	0.0557873	0.0588927	0.017207	0.0601514	0.0628668	0.00253472
0.00580078	0.00919754	0.009375	0.0272418	0.00851562	0.00354384	0.0039605	0.00651259	0.00104384	0.0705131	0.0238281	0.0278125	0.00253472	0.0780131	0.00635634	0.0252626	0.00604384	0.00635634	0.00378472	0.00955078	0.005	0.0250195	0.00695312	0.00125	0.00620009	0.0197418	0.00320312	0.0177626	0.005	0.0112847	0.0039605	0.0526427	0.0119531	0.0212695	0.00195312	0.0813812	0.00580078	0.00548828	0.01125	0.0506983	0.0398302	0.0698498	0.00753472	0.0654552	0.0398302	0.0623498	0.00125	0.0563428	0.0251128	0.0159918
0.0835889	0.0639779	0.0597803	0.0481983	0.0768637	0.0613927	0.0733459	0.0655334	0.0618181	0.0107661	0.0842074	0.0525928	0.0665685	0.0174848	0.0748302	0.0492052	0.0795959	0.0748302	0.0753185	0.0441358	0.0786866	0.081115	0.0825928	0.0674366	0.0533459	0.0531983	0.0713428	0.0417834	0.0786866	0.0713428	0.0563927	0.00901259	0.0909262	0.0669483	0.0586866	0.0103668	0.0835889	0.0481983	0.0474366	0.00548828	0.0138563	0.00836806	0.0503185	0.00495009	0.0138563	0.0133681	0.0524366	0.00320312	0.110006	0.0763927
0.024707	0.0517757	0.0500781	0.0675543	0.0178125	0.0297938	0.0197418	0.0451063	0.0143251	0.0840287	0.0053125	0.0603906	0.0223003	0.115591	0.0357313	0.0649501	0.0243251	0.0357313	0.0260503	0.0289258	0.0291406	0.076582	0.019375	0.0228906	0.0404188	0.0625543	0.013125	0.0463563	0.0291406	0.0563628	0.0264605	0.0889709	0.024375	0.069082	0.0328125	0.117084	0.024707	0.0254883	0.0228906	0.0617139	0.0564709	0.107662	0.0210503	0.0974084	0.0564709	0.102662	0.0178906	0.0849366	0.0147222	0.0663043
0.036773	0.0336854	0.0276128	0.0279883	0.0342014	0.0249501	0.0306272	0.0330751	0.0179883	0.0709385	0.0279514	0.0223003	0.0249045	0.087501	0.0365126	0.0244813	0.0335438	0.0365126	0.0336545	0.0144293	0.0366753	0.0560438	0.0347222	0.0254253	0.0190126	0.0254883	0.0234722	0.0168251	0.0366753	0.0388281	0.0195334	0.0596306	0.0463889	0.0489605	0.0225347	0.0848968	0.036773	0.00911675	0.00542535	0.0414014	0.0490056	0.0675407	0.0124045	0.0611931	0.0490056	0.0650408	0.0104253	0.0554053	0.0507639	0.0531272
0.0437695	0.0614632	0.0541406	0.0703668	0.033125	0.0457313	0.0344293	0.0604188	0.0240126	0.0843412	0.01	0.0500781	0.0313628	0.115279	0.0560438	0.0608876	0.0440126	0.0560438	0.0401128	0.0367383	0.0488281	0.0981445	0.0390625	0.0375781	0.0451063	0.0628668	0.0278125	0.0491688	0.0488281	0.0710503	0.031148	0.0899084	0.0440625	0.0868945	0.0425	0.118647	0.0437695	0.0251758	0.0175781	0.0570264	0.0611584	0.105475	0.0213628	0.0952209	0.0611584	0.0979748	0.0225781	0.0877491	0.0337847	0.0816168
0.0403125	0.0134358	0.00673828	0.0104253	0.037207	0.0228212	0.0303472	0.0205556	0.0199306	0.0708451	0.0498633	0.00205078	0.0191168	0.0672514	0.0337587	0.00282118	0.0399306	0.0337587	0.0278668	0.0119531	0.035957	0.0394531	0.0437695	0.024707	0.00586806	0.00542535	0.0325195	0.00680556	0.035957	0.023023	0.00948785	0.040631	0.0487695	0.0269531	0.0120508	0.0687445	0.0403125	0.00351562	0.00470703	0.0435303	0.0482873	0.0455334	0.00786675	0.0440685	0.0482873	0.0405334	0.00970703	0.0453858	0.074273	0.0241753
0.024707	0.0517757	0.0500781	0.0675543	0.0178125	0.0297938	0.0197418	0.0451063	0.0143251	0.0840287	0.0053125	0.0603906	0.0223003	0.115591	0.0357313	0.0649501	0.0243251	0.0357313	0.0260503	0.0289258	0.0291406	0.076582	0.019375	0.0228906	0.0404188	0.0625543	0.013125	0.0463563	0.0291406	0.0563628	0.0264605	0.0889709	0.024375	0.069082	0.0328125	0.117084	0.024707	0.0254883	0.0228906	0.0617139	0.0564709	0.107662	0.0210503	0.0974084	0.0564709	0.102662	0.0178906	0.0849366	0.0147222	0.0663043
0.0854552	0.0567036	0.051881	0.0443181	0.0785998	0.0623389	0.073615	0.0619483	0.0631983	0.0119293	0.093131	0.0453185	0.0642595	0.0102105	0.0751514	0.0423389	0.0831983	0.0751514	0.0730095	0.0458459	0.0792248	0.0770959	0.0870373	0.0679748	0.0491358	0.0468181	0.0757873	0.0406983	0.0792248	0.0662908	0.0527556	0.00298828	0.0920373	0.0608459	0.0553185	0.00607856	0.0854552	0.0467834	0.0479748	0.00776259	0.0143945	0.00226562	0.0492595	0.000800781	0.0143945	0.00476563	0.0529748	0.00211806	0.119416	0.0655681
0.0437695	0.0614632	0.0541406	0.0703668	0.033125	0.0457313	0.0344293	0.0604188	0.0240126	0.0843412	0.01	0.0500781	0.0313628	0.115279	0.0560438	0.0608876	0.0440126	0.0560438	0.0401128	0.0367383	0.0488281	0.0981445	0.0390625	0.0375781	0.0451063	0.0628668	0.0278125	0.0491688	0.0488281	0.0710503	0.031148	0.0899084	0.0440625	0.0868945	0.0425	0.118647	0.0437695	0.0251758	0.0175781	0.0570264	0.0611584	0.105475	0.0213628	0.0952209	0.0611584	0.0979748	0.0225781	0.0877491	0.0337847	0.0816168
0.0403125	0.0134358	0.00673828	0.0104253	0.037207	0.0228212	0.0303472	0.0205556	0.0199306	0.0708451	0.0498633	0.00205078	0.0191168	0.0672514	0.0337587	0.00282118	0.0399306	0.0337587	0.0278668	0.0119531	0.035957	0.0394531	0.0437695	0.024707	0.00586806	0.00542535	0.0325195	0.00680556	0.035957	0.023023	0.00948785	0.040631	0.0487695	0.0269531	0.0120508	0.0687445	0.0403125	0.00351562	0.00470703	0.0435303	0.0482873	0.0455334	0.00786675	0.0440685	0.0482873	0.0405334	0.00970703	0.0453858	0.074273	0.0241753
0.00680556	0.0144601	0.0152626	0.0281337	0.0106272	0.00351562	0.0065625	0.0090625	0.00253472	0.0712445	0.0226584	0.0330751	0.00673828	0.0832757	0.00695312	0.0291406	0.0053125	0.00695312	0.00798828	0.00875868	0.00635634	0.0260503	0.00635634	0.00260634	0.009375	0.0231337	0.00260634	0.0178125	0.00635634	0.0143251	0.00851562	0.0566553	0.0146897	0.0243837	0.00526259	0.0836577	0.00680556	0.00782118	0.0126063	0.0503185	0.0411866	0.0729639	0.0104883	0.0675928	0.0411866	0.0679639	0.00260634	0.0563927	0.023457	0.0238281
0.030523	0.0214198	0.0190972	0.0125195	0.0299045	0.0135438	0.0256272	0.0190126	0.0154883	0.0702353	0.037717	0.0200347	0.0217014	0.0802353	0.0238563	0.0152626	0.0260438	0.0238563	0.0279514	0.004273	0.0272222	0.0330751	0.0291753	0.0184722	0.0112001	0.0150195	0.0204253	0.00526259	0.0272222	0.0240625	0.0156272	0.049865	0.040842	0.0259918	0.0141753	0.0738812	0.030523	0.0077105	0.00847222	0.0431983	0.0470525	0.054572	0.0117014	0.0501775	0.0470525	0.057072	0.00847222	0.0438428	0.0542795	0.0351584
0.0616032	0.055	0.0501775	0.0674887	0.0526514	0.0565685	0.0503185	0.0595373	0.0446241	0.00600694	0.0579639	0.053615	0.0438927	0.0135069	0.064381	0.0582873	0.0640685	0.064381	0.0501427	0.0503532	0.0608025	0.0874887	0.0627556	0.0520525	0.0492248	0.0599887	0.0540056	0.0557873	0.0608025	0.0665316	0.0403185	0.0112847	0.0610889	0.072072	0.0477556	0.0190972	0.0616032	0.0412907	0.0420525	0.0065625	0.00347222	0.0234918	0.0388927	0.0190972	0.00347222	0.0159918	0.0420525	0.017207	0.0764709	0.0623498
0.0987162	0.0822302	0.0749077	0.0842978	0.0949076	0.0870062	0.089376	0.0880218	0.0789593	0.00205078	0.0991264	0.0708451	0.0794736	0.00564453	0.0973187	0.0748187	0.0989593	0.0973187	0.0882236	0.0780131	0.0969389	0.112076	0.100845	0.0856889	0.0727093	0.0767978	0.0895952	0.0767718	0.0969389	0.0918174	0.0724228	0.0103668	0.105845	0.100826	0.0769389	0.00901259	0.0987162	0.0664506	0.0656889	0.00482856	0.0089605	0.0190972	0.0694736	0.0156793	0.0089605	0.0115972	0.0706889	0.0150434	0.122911	0.0955478
0.0347418	0.00860726	0.00378472	0.0171897	0.0296962	0.0218945	0.023457	0.0170508	0.0177626	0.0755478	0.0506337	0.00722222	0.013125	0.0674228	0.029707	0.00798828	0.037207	0.029707	0.019375	0.0156793	0.0300347	0.0371897	0.0398003	0.0212847	0.00673828	0.00968967	0.0310503	0.0133008	0.0300347	0.0201389	0.00564453	0.0420525	0.0381337	0.021773	0.00917535	0.0730131	0.0347418	0.00661675	0.0112847	0.0529552	0.049865	0.0503532	0.008125	0.049865	0.049865	0.0428532	0.0112847	0.051881	0.0691406	0.0120508
0.0393837	0.00774138	0.00354384	0.00555556	0.0440647	0.019375	0.0341406	0.0132031	0.0251128	0.0779632	0.0695334	0.00635634	0.023457	0.066557	0.0278125	0.0015625	0.0378906	0.0278125	0.029707	0.0146181	0.0330751	0.0234722	0.0447938	0.0243251	0.00351562	0.000555556	0.0360438	0.00695312	0.0330751	0.0126063	0.014375	0.0399366	0.0531272	0.0168056	0.0102626	0.0669389	0.0393837	0.00868056	0.0143251	0.0520373	0.0529053	0.0453858	0.017207	0.0458741	0.0529053	0.0403858	0.0143251	0.0455334	0.085332	0.01625
0.00253472	0.0208143	0.0259918	0.0542795	0.00260634	0.00945312	0.00125	0.014375	0.00555556	0.0882236	0.0240126	0.0594293	0.00580078	0.0996299	0.00726563	0.0550781	0.005	0.00726563	0.00205078	0.0232378	0.0027105	0.0342795	0.0027105	0.0039605	0.0240625	0.0467795	0.0039605	0.040625	0.0027105	0.0223459	0.0132031	0.0742595	0.00104384	0.0288628	0.0116168	0.10522	0.00253472	0.0241753	0.0339605	0.075631	0.0525407	0.0974431	0.0208008	0.092072	0.0525407	0.0899431	0.0139605	0.0792052	0.0125195	0.0191406
0.0546181	0.0227414	0.0135438	0.0125087	0.0523459	0.0335156	0.044375	0.03125	0.0303472	0.0751507	0.0600022	0.00135634	0.0306445	0.071557	0.0469531	0.00351562	0.053125	0.0469531	0.0418945	0.0187587	0.0502626	0.0504253	0.0580751	0.0365126	0.0115625	0.00750868	0.0443251	0.01	0.0502626	0.0326063	0.0185156	0.0449366	0.0664084	0.0387587	0.0213563	0.0719389	0.0546181	0.00782118	0.00651259	0.0442248	0.0550928	0.0473389	0.0143945	0.0458741	0.0550928	0.0423389	0.0165126	0.0485802	0.0908008	0.0382031
0.0210261	0.0148917	0.0200691	0.0390296	0.0326472	0.0159567	0.0241859	0.011113	0.0262692	0.101832	0.0735847	0.0535066	0.0238538	0.0937072	0.0137692	0.0420505	0.0212692	0.0137692	0.0201038	0.0319636	0.0163191	0.0168074	0.0260847	0.0175691	0.0208005	0.0315296	0.0273347	0.037363	0.0163191	0.0119788	0.0263734	0.0683369	0.0310847	0.0180574	0.0154597	0.0970753	0.0210261	0.0329011	0.0475691	0.0870174	0.0661494	0.0866376	0.0388538	0.0861494	0.0661494	0.0791376	0.0275691	0.0759432	0.0598695	0.0127796
0.0238281	0.00218582	0.00298828	0.0122222	0.0301758	0.00993055	0.0213628	0.00375868	0.0184462	0.0824077	0.0656445	0.0208008	0.0156793	0.0710014	0.0133681	0.0121181	0.0234462	0.0133681	0.0169293	0.0140625	0.0175195	0.01125	0.0292383	0.0137695	0.00407118	0.00722222	0.0254883	0.0125087	0.0175195	0.004273	0.0115972	0.044381	0.0342383	0.00625	0.00470703	0.0724945	0.0238281	0.013125	0.0237695	0.0625928	0.0523498	0.0548302	0.0194293	0.0553185	0.0523498	0.0498302	0.0137695	0.0510889	0.0675543	0.00347222
0.0143074	0.0274698	0.0276472	0.0474671	0.0150691	0.0159567	0.0124671	0.0228317	0.00955045	0.0809729	0.0225691	0.0460847	0.0129945	0.0962854	0.0187692	0.045488	0.0145505	0.0187692	0.0142445	0.0219636	0.0154597	0.0452449	0.0135066	0.0117097	0.0225192	0.0399671	0.00975662	0.0340817	0.0154597	0.029557	0.0163734	0.070915	0.0185066	0.0414949	0.0163191	0.0996534	0.0143074	0.0179011	0.0217097	0.061158	0.05029	0.0900751	0.0179945	0.0837275	0.05029	0.0825751	0.0117097	0.072662	0.0238538	0.0362171
0.0534918	0.0198573	0.0150347	0.00205078	0.0542795	0.0262001	0.0460959	0.0238563	0.033457	0.0792978	0.072717	0.00847222	0.0357639	0.0736728	0.0390126	0.00229384	0.0490126	0.0390126	0.0445139	0.0119293	0.0462847	0.0326063	0.0560503	0.0350347	0.0110438	0.00455078	0.0448003	0.00260634	0.0462847	0.025	0.0232834	0.0433025	0.067717	0.023023	0.0204253	0.0673187	0.0534918	0.0128668	0.0150347	0.0497608	0.058615	0.0416032	0.0207639	0.041115	0.058615	0.0441032	0.0200347	0.0411866	0.0967795	0.0321897
0.0143251	0.0520187	0.0546962	0.0787001	0.0170139	0.0251758	0.017207	0.0398633	0.0156793	0.0948968	0.0138889	0.0806337	0.0241406	0.125834	0.0254883	0.080332	0.013457	0.0254883	0.0228906	0.0372938	0.0193837	0.0653668	0.00961806	0.0181337	0.0445508	0.0712001	0.00836806	0.0586133	0.0193837	0.0493837	0.0339258	0.100464	0.0179514	0.0674501	0.0330556	0.128091	0.0143251	0.0357313	0.0381337	0.0764709	0.0617139	0.12603	0.0341406	0.115776	0.0617139	0.11853	0.0231337	0.0971935	0.0065625	0.0643945
0.055631	0.0637934	0.0614709	0.0721241	0.0638927	0.051447	0.0579574	0.058322	0.0492074	0.0119878	0.0663927	0.0724084	0.0559848	0.0273003	0.0567595	0.0709783	0.0525407	0.0567595	0.0597348	0.0557873	0.0567834	0.0765685	0.0548302	0.0505334	0.0530095	0.0646241	0.0485802	0.062072	0.0567834	0.0617139	0.0568637	0.0250781	0.0698302	0.0803185	0.0526427	0.0273351	0.055631	0.0492248	0.0505334	0.00948785	0.00695312	0.0417383	0.0559848	0.0353906	0.00695312	0.0342383	0.0455334	0.0234918	0.0718441	0.0817074
0.023023	0.0261854	0.0213628	0.0406272	0.0121181	0.0218945	0.0117383	0.0287695	0.00604384	0.0696885	0.00961806	0.0248003	0.00726563	0.085001	0.029707	0.0314258	0.0254883	0.029707	0.0135156	0.0156793	0.0241753	0.0606272	0.0222222	0.0154253	0.018457	0.0331272	0.0134722	0.0250195	0.0241753	0.037717	0.00564453	0.0596306	0.0205556	0.0452105	0.0150347	0.0905912	0.023023	0.00661675	0.00542535	0.0470959	0.0440056	0.0737908	0.00226562	0.0674431	0.0440056	0.0662908	0.00542535	0.0635998	0.028125	0.0354883
0.0388281	0.00718582	0.00298828	0.00722222	0.0401758	0.0199306	0.0313628	0.0137587	0.0234462	0.0774077	0.0656445	0.00580078	0.0206793	0.0660014	0.0283681	0.00211806	0.0384462	0.0283681	0.0269293	0.0140625	0.0325195	0.02625	0.0442383	0.0237695	0.00407118	0.00222222	0.0354883	0.00750868	0.0325195	0.014273	0.0115972	0.039381	0.0492383	0.01625	0.00970703	0.0674945	0.0388281	0.008125	0.0137695	0.0525928	0.0523498	0.0448302	0.0144293	0.0453185	0.0523498	0.0398302	0.0137695	0.0460889	0.0825543	0.0134722
0.0180751	0.0507687	0.0509462	0.0724501	0.0182639	0.0264258	0.018457	0.0411133	0.0144293	0.0886468	0.0101389	0.0693837	0.0228906	0.119584	0.0292383	0.071582	0.017207	0.0292383	0.0241406	0.0335438	0.0231337	0.0691167	0.0133681	0.0193837	0.0408008	0.0649501	0.00961806	0.0523633	0.0231337	0.0506337	0.0301758	0.0942139	0.0217014	0.0687001	0.0318056	0.121841	0.0180751	0.0294813	0.0293837	0.0677209	0.0579639	0.11728	0.0278906	0.107026	0.0579639	0.10978	0.0193837	0.0909435	0.0103125	0.0656445
0.0253125	0.0235921	0.0187695	0.0259462	0.0320508	0.0166753	0.0251389	0.0215972	0.0138889	0.0710014	0.033457	0.022207	0.0196897	0.0824076	0.0244878	0.0223003	0.0222222	0.0244878	0.0259397	0.0160156	0.0254883	0.0403906	0.0254883	0.0167383	0.0112847	0.0184462	0.0167383	0.0178472	0.0254883	0.0240126	0.017092	0.0570373	0.0404883	0.0416406	0.0143945	0.0824424	0.0253125	0.00695312	0.00673828	0.0428532	0.0453185	0.0702209	0.0146897	0.0648498	0.0453185	0.0627209	0.00673828	0.0564275	0.0464084	0.0430295
0.107626	0.167485	0.187762	0.263442	0.127528	0.152244	0.124535	0.164587	0.134119	0.292805	0.130341	0.24995	0.137172	0.325305	0.136306	0.255212	0.114119	0.136306	0.125922	0.202001	0.120887	0.198719	0.107216	0.129637	0.183025	0.230942	0.115966	0.238337	0.120887	0.170922	0.16516	0.30086	0.112216	0.219969	0.158466	0.347423	0.107626	0.179188	0.189637	0.273916	0.231798	0.35713	0.179672	0.344923	0.231798	0.32463	0.154637	0.315498	0.0878752	0.189692
0.154305	0.177743	0.194676	0.236735	0.17116	0.174183	0.165381	0.185121	0.161631	0.192222	0.164285	0.224363	0.168565	0.21941	0.170746	0.229339	0.154964	0.170746	0.167315	0.199773	0.163113	0.21368	0.153348	0.161863	0.186058	0.214235	0.152098	0.218871	0.163113	0.188669	0.1821	0.213113	0.168348	0.22993	0.176785	0.230694	0.154305	0.179461	0.181863	0.183148	0.166863	0.24993	0.186065	0.239676	0.166863	0.22743	0.166863	0.218871	0.150987	0.216319
0.116378	0.166354	0.184132	0.243001	0.154757	0.149876	0.144121	0.160267	0.144538	0.220365	0.156476	0.238819	0.153281	0.248958	0.136439	0.238939	0.116204	0.136439	0.144531	0.2013	0.128663	0.181612	0.116944	0.134913	0.173704	0.210501	0.123194	0.226517	0.128663	0.158958	0.177793	0.240718	0.141944	0.220362	0.159288	0.26441	0.116378	0.175987	0.184913	0.208513	0.178061	0.29351	0.190781	0.28228	0.178061	0.26101	0.154913	0.249665	0.114844	0.203418
0.136432	0.159143	0.171921	0.19967	0.174264	0.147691	0.160842	0.156675	0.150425	0.173373	0.171296	0.201608	0.163049	0.196654	0.144254	0.198941	0.130425	0.144254	0.161799	0.179948	0.144264	0.169948	0.136452	0.143014	0.157613	0.17717	0.135202	0.190425	0.144264	0.15258	0.175608	0.190358	0.171452	0.206198	0.155983	0.201273	0.136432	0.159636	0.163014	0.157632	0.148014	0.226198	0.180549	0.216921	0.148014	0.203698	0.148014	0.190425	0.15133	0.20592
0.184839	0.245053	0.264976	0.34385	0.234325	0.231055	0.22043	0.240273	0.222235	0.27596	0.234013	0.330289	0.229941	0.305335	0.211992	0.334023	0.18668	0.211992	0.218691	0.297964	0.201226	0.2651	0.187554	0.209976	0.255586	0.29885	0.196304	0.326523	0.201226	0.235705	0.261055	0.310289	0.215888	0.315933	0.238804	0.32905	0.184839	0.259527	0.269976	0.272441	0.234976	0.375933	0.278691	0.363726	0.234976	0.330933	0.234976	0.326523	0.180644	0.288711
0.180494	0.208545	0.225748	0.274895	0.214706	0.205381	0.202959	0.215772	0.194765	0.204326	0.201425	0.257935	0.204619	0.23292	0.199444	0.264443	0.179209	0.199444	0.203369	0.242916	0.192779	0.242395	0.18106	0.191529	0.214209	0.242395	0.17981	0.259522	0.192779	0.213352	0.221631	0.236253	0.209394	0.276978	0.208404	0.24726	0.180494	0.210103	0.211529	0.195437	0.181097	0.281546	0.227119	0.270316	0.181097	0.249046	0.196529	0.24409	0.181182	0.262256
0.106642	0.134995	0.139513	0.207545	0.126414	0.138256	0.117371	0.144819	0.112232	0.243618	0.110164	0.166075	0.11368	0.26643	0.132944	0.183413	0.112788	0.132944	0.11493	0.170861	0.119825	0.18685	0.11006	0.116075	0.136381	0.167545	0.10631	0.188569	0.119825	0.145103	0.12909	0.245736	0.121726	0.206017	0.128497	0.291951	0.106642	0.126173	0.126075	0.210007	0.193236	0.293177	0.13493	0.282923	0.193236	0.253177	0.116075	0.265729	0.101101	0.172683
0.149023	0.149925	0.164628	0.19529	0.169498	0.157773	0.159544	0.164804	0.148572	0.154956	0.160436	0.179316	0.155774	0.174331	0.159335	0.185117	0.14746	0.159335	0.159524	0.175585	0.155878	0.190013	0.150019	0.149628	0.155742	0.17279	0.143769	0.183554	0.155878	0.164177	0.162356	0.17035	0.171686	0.207929	0.155644	0.183394	0.149023	0.150273	0.149628	0.140975	0.136912	0.200213	0.163274	0.191912	0.136912	0.177713	0.144628	0.175838	0.159915	0.198763
0.140966	0.197817	0.216219	0.288839	0.185594	0.182589	0.173084	0.191104	0.176	0.328918	0.190438	0.280282	0.182869	0.355637	0.164776	0.281651	0.142667	0.164776	0.171619	0.244637	0.155126	0.2137	0.143407	0.163876	0.207667	0.248839	0.152157	0.272354	0.155126	0.187921	0.211755	0.334942	0.168407	0.2587	0.190751	0.376713	0.140966	0.21245	0.223876	0.303363	0.266036	0.39586	0.229119	0.38463	0.266036	0.35586	0.188876	0.349515	0.139431	0.234255
0.144697	0.176108	0.202686	0.24613	0.184613	0.167553	0.172788	0.175913	0.172093	0.242981	0.196019	0.255498	0.18187	0.265637	0.155991	0.248803	0.141538	0.155991	0.17312	0.214463	0.153154	0.18738	0.145342	0.159405	0.191225	0.22113	0.151592	0.234663	0.153154	0.173415	0.202553	0.253646	0.173675	0.225713	0.179873	0.274352	0.144697	0.198526	0.209404	0.230018	0.202553	0.298861	0.21562	0.289584	0.202553	0.273861	0.179404	0.257811	0.155151	0.218491
0.12554	0.172611	0.193294	0.268553	0.153086	0.167233	0.145645	0.176374	0.150506	0.232027	0.153555	0.249232	0.153555	0.259371	0.152546	0.256296	0.131061	0.152546	0.144805	0.217962	0.139076	0.209108	0.127357	0.145326	0.188561	0.231053	0.133607	0.247624	0.139076	0.17826	0.179316	0.25363	0.139023	0.237025	0.169701	0.283017	0.12554	0.1864	0.195326	0.224619	0.188474	0.310173	0.193555	0.298942	0.188474	0.272673	0.165326	0.270772	0.115117	0.206191
0.140151	0.156089	0.165522	0.213137	0.163673	0.160307	0.153171	0.168744	0.142199	0.153037	0.144298	0.182709	0.148855	0.177725	0.159369	0.195463	0.141088	0.159369	0.152605	0.185619	0.151459	0.202859	0.141694	0.145209	0.157182	0.180637	0.135444	0.197494	0.151459	0.16757	0.15989	0.178743	0.16336	0.225776	0.155131	0.194287	0.140151	0.147807	0.145209	0.139056	0.132493	0.218059	0.161355	0.207806	0.132493	0.185559	0.140209	0.189778	0.141277	0.206609
0.14559	0.18325	0.211079	0.268967	0.183839	0.176918	0.172986	0.184028	0.177014	0.32659	0.198995	0.272641	0.183318	0.347996	0.161606	0.268168	0.145903	0.161606	0.172068	0.230356	0.155297	0.199939	0.147485	0.164047	0.20309	0.238967	0.156235	0.255278	0.155297	0.182502	0.207752	0.322302	0.169151	0.236606	0.187016	0.362684	0.14559	0.210668	0.224047	0.302145	0.266208	0.373766	0.224568	0.364489	0.266208	0.343766	0.189047	0.332438	0.151599	0.219939
0.168089	0.159854	0.173577	0.192716	0.180088	0.170042	0.17236	0.180276	0.156387	0.182591	0.158369	0.172015	0.165817	0.207123	0.177854	0.181292	0.165276	0.177854	0.174567	0.174104	0.174671	0.209938	0.166858	0.163421	0.162464	0.175216	0.155608	0.179026	0.174671	0.181876	0.167125	0.193697	0.188525	0.220354	0.16639	0.212435	0.168089	0.150042	0.143421	0.156665	0.163853	0.215787	0.160817	0.206509	0.163853	0.198287	0.148421	0.194458	0.174098	0.216188
0.198463	0.244404	0.260982	0.337777	0.232805	0.241354	0.222109	0.252525	0.218636	0.26056	0.213587	0.303795	0.225097	0.293841	0.229791	0.318229	0.202525	0.229791	0.221347	0.291041	0.215826	0.291249	0.200201	0.217076	0.252838	0.292777	0.201451	0.316275	0.215826	0.251156	0.249687	0.298795	0.221868	0.327916	0.240357	0.319779	0.198463	0.245104	0.247076	0.251764	0.227076	0.357916	0.258847	0.344732	0.227076	0.312916	0.227076	0.316275	0.184941	0.296249
0.194278	0.210688	0.229766	0.267932	0.22336	0.210745	0.212646	0.219104	0.205563	0.202376	0.219766	0.260079	0.214228	0.225032	0.206682	0.261995	0.192229	0.206682	0.212978	0.241544	0.202735	0.240294	0.194922	0.201485	0.219417	0.242932	0.193672	0.255354	0.202735	0.217718	0.227412	0.226931	0.219922	0.267794	0.214454	0.234859	0.194278	0.218106	0.221485	0.196913	0.183337	0.264645	0.232978	0.255368	0.183337	0.239645	0.206485	0.232206	0.202509	0.258349
0.106486	0.16898	0.186622	0.265357	0.135555	0.152631	0.12909	0.163725	0.136451	0.223949	0.137117	0.25006	0.140477	0.255199	0.135444	0.2556	0.112006	0.135444	0.129227	0.208361	0.120997	0.195913	0.107325	0.129747	0.180913	0.227857	0.116075	0.242475	0.120997	0.166588	0.169715	0.249458	0.118992	0.226329	0.158575	0.278845	0.106486	0.179298	0.189747	0.219041	0.177896	0.309478	0.185477	0.297271	0.177896	0.271978	0.154747	0.265623	0.0911796	0.195496
0.182759	0.194524	0.218247	0.247386	0.204758	0.194712	0.19703	0.204946	0.191057	0.247292	0.203039	0.246685	0.200487	0.271824	0.192524	0.245962	0.179946	0.192524	0.199237	0.218774	0.189341	0.224608	0.181528	0.188091	0.207134	0.229886	0.180278	0.233696	0.189341	0.206546	0.211795	0.256083	0.203195	0.245024	0.20106	0.277136	0.182759	0.204712	0.208091	0.229052	0.216239	0.288173	0.215487	0.278895	0.216239	0.270673	0.193091	0.256844	0.188768	0.240858
0.0906693	0.164379	0.170806	0.235374	0.127238	0.129732	0.11869	0.142075	0.122718	0.275848	0.130051	0.232993	0.131327	0.308348	0.113794	0.2327	0.0916068	0.113794	0.120077	0.185044	0.103931	0.165096	0.0902591	0.112681	0.160513	0.202874	0.0990091	0.215825	0.103931	0.142855	0.159315	0.283904	0.111926	0.203013	0.141509	0.324911	0.0906693	0.162232	0.172681	0.251404	0.214841	0.340174	0.173827	0.327966	0.214841	0.307674	0.137681	0.292986	0.0820299	0.183846
0.147592	0.15701	0.172963	0.198078	0.163614	0.156498	0.156862	0.168685	0.14589	0.163009	0.147989	0.1864	0.156296	0.191446	0.15931	0.191654	0.144779	0.15931	0.160046	0.17056	0.15515	0.1953	0.145385	0.1489	0.160873	0.180578	0.139135	0.182435	0.15515	0.171261	0.163581	0.18265	0.167051	0.210717	0.158822	0.196759	0.147592	0.151498	0.1489	0.146713	0.1439	0.210717	0.161296	0.200463	0.1439	0.193217	0.1439	0.182435	0.148718	0.20655
0.143682	0.16636	0.184053	0.218752	0.178454	0.15988	0.166495	0.170192	0.157189	0.283158	0.170954	0.214366	0.169053	0.309721	0.155817	0.215036	0.139411	0.155817	0.167803	0.192901	0.153116	0.18889	0.14335	0.151866	0.170505	0.193751	0.1421	0.206442	0.153116	0.16756	0.183213	0.281526	0.175017	0.223057	0.166788	0.317325	0.143682	0.169463	0.171866	0.24538	0.234026	0.320218	0.187803	0.309964	0.234026	0.295218	0.156866	0.283603	0.151475	0.218057
0.208012	0.213932	0.228501	0.24375	0.238344	0.210521	0.226172	0.220755	0.210755	0.162268	0.226625	0.241938	0.224629	0.186799	0.213333	0.241771	0.200755	0.213333	0.228379	0.229028	0.214594	0.236528	0.206782	0.208344	0.212943	0.22625	0.200532	0.234505	0.214594	0.21791	0.230938	0.191892	0.241782	0.265278	0.216313	0.187667	0.208012	0.209965	0.208344	0.155416	0.157048	0.218982	0.229629	0.209704	0.157048	0.201482	0.203344	0.188209	0.22291	0.27
0.143193	0.19481	0.205713	0.275008	0.175036	0.182334	0.165589	0.194756	0.162117	0.202791	0.157067	0.247275	0.169828	0.237322	0.172022	0.259209	0.146006	0.172022	0.166078	0.228272	0.159307	0.23098	0.143682	0.160557	0.196318	0.235008	0.144932	0.253506	0.159307	0.194637	0.193167	0.239775	0.165348	0.265147	0.183838	0.259509	0.143193	0.188584	0.190557	0.193994	0.170557	0.295147	0.201078	0.281963	0.170557	0.255147	0.170557	0.253506	0.129671	0.23848
0.19354	0.216524	0.221177	0.254773	0.212193	0.208367	0.204408	0.222586	0.189825	0.184599	0.18188	0.22899	0.20142	0.218974	0.211804	0.241336	0.191492	0.211804	0.20767	0.224165	0.204927	0.257134	0.191255	0.196177	0.207898	0.229773	0.182505	0.236336	0.204927	0.224129	0.210033	0.218558	0.216255	0.277134	0.207505	0.228801	0.19354	0.193228	0.186177	0.169321	0.170745	0.251702	0.20517	0.239495	0.170745	0.226702	0.186177	0.220903	0.187123	0.26769
0.0894647	0.153174	0.154601	0.225281	0.104367	0.129083	0.101374	0.141426	0.105958	0.154335	0.0971795	0.201789	0.109011	0.186835	0.118145	0.212051	0.0959577	0.118145	0.102761	0.16884	0.102726	0.180558	0.0890545	0.106476	0.149864	0.192781	0.0928045	0.200176	0.102726	0.147761	0.131999	0.185539	0.0940545	0.196808	0.130305	0.208953	0.0894647	0.141027	0.146476	0.153594	0.121476	0.236808	0.141511	0.224601	0.121476	0.204308	0.121476	0.200176	0.0697142	0.166531
0.185773	0.189328	0.198761	0.219011	0.216105	0.189532	0.202683	0.198516	0.184766	0.192714	0.198136	0.205949	0.19739	0.215995	0.193594	0.210782	0.179766	0.193594	0.20364	0.206789	0.193605	0.219289	0.185793	0.184855	0.184454	0.196511	0.177043	0.209766	0.193605	0.194421	0.202448	0.209699	0.220793	0.248039	0.190324	0.220613	0.185773	0.178976	0.174855	0.169473	0.174855	0.238039	0.19989	0.228761	0.174855	0.215539	0.174855	0.209766	0.200671	0.247761
0.114263	0.153884	0.159517	0.231026	0.135559	0.150331	0.127493	0.158847	0.124854	0.171938	0.120403	0.19358	0.127278	0.198657	0.142519	0.209394	0.120409	0.142519	0.126028	0.187935	0.128424	0.200331	0.116705	0.127174	0.155409	0.191026	0.115455	0.210097	0.128424	0.160108	0.146164	0.198796	0.128371	0.221998	0.144049	0.224178	0.114263	0.145748	0.147174	0.16166	0.13989	0.249714	0.153528	0.238483	0.13989	0.209714	0.132174	0.217813	0.10384	0.188664
0.128163	0.156381	0.168534	0.203233	0.162935	0.144361	0.150976	0.154674	0.14167	0.167331	0.155435	0.198847	0.153534	0.193893	0.140299	0.199517	0.123892	0.140299	0.152284	0.177382	0.137597	0.173372	0.127831	0.136347	0.154986	0.178233	0.126581	0.190924	0.137597	0.152041	0.167694	0.188847	0.159498	0.207538	0.151269	0.201497	0.128163	0.153944	0.156347	0.152701	0.141347	0.227538	0.172284	0.217284	0.141347	0.202538	0.141347	0.190924	0.135956	0.202538
0.127889	0.173525	0.175408	0.264981	0.130564	0.174668	0.128757	0.18584	0.129173	0.200078	0.101346	0.203221	0.126745	0.23336	0.168106	0.231543	0.14084	0.168106	0.127995	0.205467	0.145252	0.247342	0.129627	0.141502	0.176153	0.219981	0.125877	0.23459	0.145252	0.19336	0.146335	0.231369	0.124627	0.252342	0.159783	0.268186	0.127889	0.154529	0.151502	0.188227	0.16465	0.28549	0.150495	0.272306	0.16465	0.24049	0.141502	0.257738	0.0965888	0.202897
0.159925	0.17826	0.187913	0.212468	0.203174	0.168336	0.186904	0.176696	0.171765	0.188116	0.19458	0.210726	0.185986	0.210772	0.166774	0.209586	0.152321	0.166774	0.187236	0.199691	0.168382	0.189274	0.160569	0.164632	0.172008	0.187468	0.156819	0.205446	0.168382	0.169754	0.19667	0.205726	0.202236	0.230941	0.175101	0.215043	0.159925	0.173753	0.174632	0.167653	0.164632	0.240941	0.199736	0.231663	0.164632	0.215941	0.164632	0.205446	0.179267	0.232607
0.162788	0.19998	0.217808	0.269603	0.187131	0.191929	0.180184	0.206851	0.174212	0.217416	0.166662	0.24937	0.184423	0.254448	0.186617	0.258804	0.163101	0.186617	0.183173	0.225367	0.176402	0.240575	0.160777	0.175152	0.205913	0.239603	0.159527	0.248101	0.176402	0.209232	0.202762	0.249587	0.182443	0.267242	0.195933	0.269135	0.162788	0.195679	0.195152	0.203805	0.187868	0.294958	0.205673	0.281774	0.187868	0.264958	0.180152	0.255817	0.149266	0.250575
0.209362	0.220655	0.234734	0.257765	0.249135	0.217227	0.233842	0.22754	0.216203	0.22853	0.231635	0.250046	0.2314	0.255092	0.218165	0.252383	0.201758	0.218165	0.23515	0.243581	0.218796	0.244571	0.20903	0.212546	0.217852	0.232765	0.20278	0.24879	0.218796	0.221574	0.24056	0.250046	0.250697	0.283737	0.222468	0.259363	0.209362	0.215144	0.212546	0.205567	0.207546	0.283737	0.24015	0.273484	0.207546	0.258737	0.207546	0.24879	0.223822	0.285404
0.146453	0.201194	0.216472	0.274795	0.180379	0.181357	0.171696	0.195654	0.169612	0.2123	0.169285	0.26366	0.180309	0.248706	0.17042	0.268232	0.146279	0.17042	0.174059	0.227781	0.160691	0.223406	0.145066	0.164441	0.204092	0.242295	0.148816	0.254404	0.160691	0.196299	0.204274	0.24741	0.170066	0.259656	0.190222	0.264157	0.146453	0.199968	0.204441	0.204892	0.179441	0.299656	0.212809	0.286472	0.179441	0.267156	0.179441	0.254404	0.135153	0.242711
0.131236	0.162579	0.179107	0.207278	0.161425	0.14542	0.152451	0.157607	0.146757	0.156592	0.1608	0.215045	0.159385	0.185029	0.140732	0.210576	0.126201	0.140732	0.155635	0.176705	0.138795	0.172278	0.129029	0.140045	0.164795	0.189778	0.130279	0.193857	0.138795	0.157961	0.17417	0.180862	0.157362	0.201861	0.157466	0.188119	0.131236	0.165142	0.170045	0.150203	0.134612	0.216429	0.179385	0.206175	0.134612	0.198929	0.150045	0.178425	0.136807	0.202139
0.120676	0.195127	0.20343	0.266605	0.171971	0.158827	0.158488	0.168592	0.161683	0.21582	0.183065	0.273742	0.172023	0.243788	0.139764	0.267889	0.118905	0.139764	0.158273	0.224348	0.133586	0.181743	0.121867	0.144836	0.191405	0.231605	0.133117	0.252342	0.133586	0.164437	0.20216	0.243742	0.153534	0.23341	0.174211	0.258893	0.120676	0.20091	0.214836	0.21369	0.174836	0.30341	0.220773	0.29218	0.174836	0.26841	0.174836	0.252342	0.123586	0.21841
0.159868	0.182056	0.200239	0.219243	0.197556	0.168218	0.18525	0.180406	0.173722	0.195285	0.191931	0.228676	0.189683	0.223723	0.166031	0.223375	0.1515	0.166031	0.188433	0.197836	0.167426	0.190909	0.157661	0.166176	0.182593	0.201743	0.156411	0.209156	0.167426	0.177426	0.201968	0.214926	0.195994	0.227993	0.181098	0.22348	0.159868	0.183774	0.186176	0.178433	0.171176	0.247993	0.204683	0.237739	0.171176	0.230493	0.171176	0.209156	0.172105	0.234937
0.176512	0.237588	0.261531	0.340548	0.212521	0.224263	0.204185	0.236685	0.209324	0.28617	0.209552	0.325594	0.215924	0.320702	0.206451	0.331138	0.180435	0.206451	0.204673	0.28409	0.192625	0.267631	0.177	0.201375	0.253248	0.300548	0.18575	0.317935	0.192625	0.237677	0.246763	0.318526	0.195333	0.305965	0.232156	0.344	0.176512	0.251902	0.261375	0.281356	0.241807	0.381397	0.262174	0.368213	0.241807	0.341397	0.226375	0.333367	0.160767	0.277076
0.123633	0.140804	0.159122	0.193538	0.151465	0.138225	0.141376	0.14721	0.134293	0.160574	0.148497	0.188809	0.143583	0.183855	0.134788	0.189475	0.12096	0.134788	0.142333	0.167149	0.131465	0.167149	0.123653	0.130215	0.148147	0.171038	0.122403	0.18096	0.131465	0.146448	0.156142	0.177559	0.148653	0.193399	0.143184	0.191807	0.123633	0.146836	0.150215	0.148167	0.135215	0.213399	0.161083	0.204122	0.135215	0.190899	0.135215	0.18096	0.131865	0.186455
0.0918759	0.164335	0.172013	0.224636	0.132612	0.124966	0.123091	0.13856	0.124897	0.274555	0.136674	0.23295	0.136978	0.308305	0.110279	0.227935	0.0893412	0.110279	0.125728	0.178751	0.103888	0.154636	0.0902158	0.112638	0.158247	0.197136	0.0989658	0.20731	0.103888	0.138367	0.163716	0.281361	0.118549	0.19672	0.141466	0.318895	0.0918759	0.162188	0.172638	0.247888	0.214798	0.33388	0.176978	0.321673	0.214798	0.30638	0.137638	0.28447	0.087681	0.186997
0.113916	0.122724	0.137022	0.156017	0.144391	0.118083	0.132354	0.126364	0.120548	0.13738	0.141579	0.157959	0.132334	0.158005	0.118395	0.155427	0.10777	0.118395	0.133584	0.140479	0.119522	0.139906	0.113662	0.115772	0.123552	0.138517	0.109912	0.147614	0.119522	0.123654	0.140166	0.149209	0.145329	0.167822	0.124287	0.159985	0.113916	0.123916	0.125772	0.120251	0.115772	0.177822	0.142334	0.169522	0.115772	0.160322	0.115772	0.147614	0.131475	0.170322
0.147484	0.185585	0.192738	0.26508	0.18128	0.183969	0.16863	0.191234	0.162658	0.197628	0.164874	0.228051	0.167165	0.223097	0.174906	0.243031	0.151547	0.174906	0.165915	0.228656	0.162895	0.228552	0.151176	0.161645	0.186547	0.22008	0.149926	0.247484	0.162895	0.187912	0.187302	0.228051	0.172842	0.262719	0.17852	0.249035	0.147484	0.180219	0.181645	0.186332	0.166645	0.282719	0.195915	0.271488	0.166645	0.237719	0.166645	0.247484	0.143728	0.231052
0.181312	0.202013	0.209301	0.2608	0.225394	0.203196	0.207597	0.207805	0.19468	0.217003	0.213051	0.235863	0.202929	0.235909	0.197883	0.244446	0.17968	0.197883	0.204179	0.243578	0.193519	0.232328	0.185707	0.189769	0.199368	0.2208	0.181957	0.251555	0.193519	0.199335	0.217363	0.238363	0.220707	0.274828	0.200238	0.253652	0.181312	0.19889	0.199769	0.198762	0.189769	0.284828	0.224179	0.275551	0.189769	0.244828	0.189769	0.251555	0.19621	0.25705
0.136223	0.165659	0.181477	0.235069	0.163769	0.163333	0.154244	0.173723	0.148272	0.21021	0.150488	0.213665	0.155904	0.238804	0.157395	0.222395	0.137161	0.157395	0.154654	0.198645	0.148508	0.204791	0.13679	0.147258	0.172161	0.202569	0.13554	0.217473	0.148508	0.173526	0.172916	0.230563	0.158456	0.232708	0.164133	0.255366	0.136223	0.165833	0.167258	0.191969	0.175407	0.275856	0.178404	0.264625	0.175407	0.243356	0.152258	0.240621	0.132467	0.213541
0.177791	0.184201	0.198279	0.227001	0.20854	0.187036	0.195603	0.195395	0.181298	0.195982	0.194946	0.213592	0.192185	0.218638	0.187973	0.218286	0.17352	0.187973	0.195935	0.210056	0.186248	0.21714	0.178435	0.179998	0.185707	0.202001	0.172185	0.216645	0.186248	0.191786	0.200369	0.213592	0.210102	0.246306	0.187967	0.226242	0.177791	0.181619	0.179998	0.176352	0.174998	0.246306	0.200935	0.237029	0.174998	0.221306	0.174998	0.216645	0.190467	0.241306
0.10814	0.134231	0.145894	0.181986	0.128186	0.12525	0.121161	0.13814	0.112689	0.137034	0.112404	0.168082	0.122821	0.168128	0.124312	0.174312	0.106578	0.124312	0.124071	0.148062	0.117925	0.166708	0.106207	0.114175	0.134078	0.159486	0.102457	0.16439	0.117925	0.140443	0.134833	0.161832	0.127873	0.187125	0.12855	0.17719	0.10814	0.12525	0.124175	0.123238	0.114175	0.197125	0.135321	0.185894	0.114175	0.174625	0.114175	0.16439	0.104384	0.177958
0.172075	0.165864	0.175297	0.195816	0.201027	0.173038	0.186762	0.178116	0.169957	0.157001	0.19087	0.182485	0.179516	0.17247	0.177101	0.186476	0.167179	0.177101	0.185766	0.189184	0.177954	0.197205	0.174047	0.169204	0.164054	0.173316	0.165297	0.189367	0.177954	0.173179	0.182622	0.170803	0.205714	0.222622	0.170766	0.178199	0.172075	0.161372	0.159204	0.139501	0.143772	0.19719	0.182016	0.189865	0.143772	0.17469	0.159204	0.173934	0.194516	0.220122
0.147484	0.185585	0.192738	0.26508	0.18128	0.183969	0.16863	0.191234	0.162658	0.197628	0.164874	0.228051	0.167165	0.223097	0.174906	0.243031	0.151547	0.174906	0.165915	0.228656	0.162895	0.228552	0.151176	0.161645	0.186547	0.22008	0.149926	0.247484	0.162895	0.187912	0.187302	0.228051	0.172842	0.262719	0.17852	0.249035	0.147484	0.180219	0.181645	0.186332	0.166645	0.282719	0.195915	0.271488	0.166645	0.237719	0.166645	0.247484	0.143728	0.231052
0.181312	0.202013	0.209301	0.2608	0.225394	0.203196	0.207597	0.207805	0.19468	0.217003	0.213051	0.235863	0.202929	0.235909	0.197883	0.244446	0.17968	0.197883	0.204179	0.243578	0.193519	0.232328	0.185707	0.189769	0.199368	0.2208	0.181957	0.251555	0.193519	0.199335	0.217363	0.238363	0.220707	0.274828	0.200238	0.253652	0.181312	0.19889	0.199769	0.198762	0.189769	0.284828	0.224179	0.275551	0.189769	0.244828	0.189769	0.251555	0.19621	0.25705
0.0730152	0.116319	0.115652	0.16022	0.0945842	0.0958277	0.0872861	0.109421	0.0788138	0.105386	0.0736467	0.139089	0.0886728	0.139136	0.0936402	0.148796	0.0727027	0.0936402	0.0899228	0.12239	0.085027	0.142442	0.0713551	0.081277	0.104109	0.13272	0.0676051	0.140671	0.085027	0.111451	0.102911	0.135339	0.0930218	0.165359	0.0976051	0.151948	0.0730152	0.0933277	0.091277	0.0915895	0.081277	0.175359	0.103673	0.163152	0.081277	0.147859	0.081277	0.140671	0.0643759	0.151192
0.145692	0.168051	0.173329	0.205397	0.159761	0.159755	0.153713	0.174599	0.140241	0.145532	0.130074	0.180517	0.15135	0.180532	0.163817	0.192724	0.14413	0.163817	0.1576	0.172567	0.156454	0.210119	0.142782	0.147704	0.160536	0.182897	0.134032	0.185849	0.156454	0.177878	0.159338	0.176551	0.164449	0.225536	0.159032	0.189595	0.145692	0.144755	0.137704	0.129051	0.129988	0.20782	0.15385	0.195613	0.129988	0.18532	0.137704	0.178133	0.137053	0.216369
0.0931489	0.150895	0.168403	0.240883	0.117361	0.134703	0.112281	0.145093	0.120753	0.277351	0.12408	0.23059	0.123941	0.305945	0.118765	0.233765	0.0985309	0.118765	0.112691	0.185571	0.105434	0.17505	0.0937153	0.114184	0.163531	0.208383	0.102465	0.218843	0.105434	0.14934	0.150953	0.281501	0.102049	0.199633	0.141059	0.326952	0.0931489	0.162758	0.174184	0.257352	0.216345	0.336794	0.166441	0.325563	0.216345	0.304294	0.139184	0.296004	0.0805035	0.171578
0.122453	0.142259	0.157942	0.197636	0.156119	0.139684	0.143669	0.147419	0.135474	0.181956	0.1519	0.188879	0.144626	0.203987	0.134997	0.190934	0.119919	0.134997	0.143376	0.173469	0.131535	0.167636	0.123723	0.130285	0.147106	0.170136	0.122473	0.186169	0.131535	0.144296	0.158434	0.195561	0.152056	0.199719	0.143254	0.214577	0.122453	0.146907	0.150285	0.163808	0.150718	0.235151	0.164626	0.225874	0.150718	0.207651	0.135285	0.201601	0.132907	0.189997
0.132145	0.181091	0.207399	0.257518	0.169274	0.162518	0.160513	0.174784	0.16343	0.212289	0.177868	0.267711	0.174048	0.242758	0.148456	0.261581	0.130096	0.148456	0.162798	0.213317	0.142555	0.189879	0.130836	0.151305	0.195096	0.232518	0.139586	0.241034	0.142555	0.17535	0.199185	0.237711	0.155836	0.227379	0.17818	0.252584	0.132145	0.199879	0.211305	0.209881	0.176305	0.287379	0.212798	0.276149	0.176305	0.262379	0.176305	0.241034	0.130611	0.217935
0.166234	0.189789	0.209222	0.241694	0.203233	0.181104	0.190921	0.190088	0.184116	0.193113	0.205264	0.24641	0.195628	0.216394	0.175166	0.242354	0.161338	0.175166	0.191878	0.21725	0.174066	0.203083	0.166253	0.175316	0.196026	0.219194	0.167503	0.231338	0.174066	0.187104	0.210687	0.214728	0.19792	0.2385	0.190785	0.222123	0.166234	0.199437	0.205316	0.185613	0.169884	0.253067	0.218128	0.24379	0.169884	0.230567	0.185316	0.215906	0.17891	0.236
0.0814364	0.1142	0.116573	0.16753	0.0871721	0.106193	0.0843183	0.119787	0.0777905	0.204116	0.0612346	0.132511	0.083205	0.237866	0.106506	0.149162	0.0855683	0.106506	0.086955	0.123311	0.0934481	0.164197	0.0797762	0.0871981	0.109475	0.14003	0.0735262	0.143537	0.0934481	0.126261	0.0949433	0.210921	0.0881096	0.17128	0.101026	0.255122	0.0814364	0.0917489	0.0871981	0.169116	0.159359	0.248441	0.093205	0.236234	0.159359	0.220941	0.0821981	0.220698	0.0639082	0.148225
0.18697	0.199666	0.209724	0.230399	0.210766	0.193871	0.201033	0.207387	0.184227	0.194614	0.18561	0.216287	0.198318	0.226333	0.198559	0.222934	0.181449	0.198559	0.204568	0.208142	0.19613	0.233038	0.184412	0.18738	0.193949	0.210399	0.175662	0.216137	0.19613	0.206981	0.204705	0.218787	0.216078	0.257205	0.196755	0.230187	0.18697	0.183455	0.17738	0.172485	0.17738	0.247205	0.199568	0.235974	0.17738	0.227205	0.17738	0.216137	0.18988	0.257205
0.145304	0.170785	0.173293	0.230764	0.187303	0.170174	0.169992	0.174159	0.158186	0.182245	0.174334	0.20048	0.164699	0.200526	0.164237	0.211424	0.145409	0.164237	0.165949	0.21132	0.158136	0.202153	0.150324	0.154386	0.165096	0.188264	0.146574	0.220409	0.158136	0.166175	0.179757	0.20423	0.181991	0.24257	0.164855	0.221256	0.145304	0.163508	0.164386	0.165116	0.154386	0.25257	0.187199	0.243293	0.154386	0.21007	0.154386	0.220409	0.15798	0.22007
0.175626	0.181546	0.196114	0.213586	0.202625	0.179246	0.191563	0.18948	0.177258	0.190067	0.190906	0.209552	0.19002	0.214598	0.182058	0.210496	0.16948	0.182058	0.19377	0.196642	0.182208	0.207475	0.174395	0.175958	0.181668	0.196086	0.168145	0.20323	0.182208	0.187746	0.196329	0.205802	0.206062	0.232892	0.183927	0.216577	0.175626	0.177579	0.175958	0.170437	0.170958	0.232892	0.19502	0.223614	0.170958	0.215392	0.170958	0.20323	0.188302	0.235392
0.0623737	0.126083	0.12751	0.195967	0.0806094	0.100881	0.0765057	0.113224	0.0799779	0.227553	0.0734219	0.174698	0.0841424	0.260053	0.0899432	0.183849	0.0677557	0.0899432	0.0778924	0.141749	0.0756354	0.150134	0.0619636	0.0793854	0.121662	0.163467	0.0657136	0.171974	0.0756354	0.118448	0.107131	0.235608	0.0702969	0.169717	0.103214	0.28106	0.0623737	0.113936	0.119385	0.202553	0.171546	0.286878	0.116642	0.274671	0.171546	0.254378	0.0943854	0.249135	0.0448455	0.141662
0.148427	0.180008	0.193681	0.236856	0.184723	0.170328	0.17249	0.181344	0.163184	0.29138	0.172067	0.225244	0.174775	0.320599	0.165016	0.229391	0.145406	0.165016	0.173525	0.207099	0.160087	0.204495	0.148369	0.158837	0.180406	0.206856	0.147119	0.222594	0.160087	0.178438	0.191162	0.294904	0.180035	0.241162	0.175712	0.331953	0.148427	0.177412	0.178837	0.253602	0.240998	0.338322	0.196025	0.327092	0.240998	0.308322	0.163837	0.299754	0.151337	0.231162
0.0848206	0.111146	0.127809	0.16917	0.108486	0.104135	0.100619	0.113119	0.0982581	0.121731	0.110517	0.164996	0.105326	0.145012	0.0981974	0.165385	0.0843693	0.0981974	0.101576	0.135836	0.0926527	0.135003	0.0848402	0.0939027	0.119057	0.14667	0.0860902	0.154369	0.0926527	0.11458	0.120385	0.14103	0.103174	0.157086	0.109371	0.155185	0.0848206	0.118024	0.123903	0.11636	0.0961866	0.17937	0.127826	0.170093	0.0961866	0.15687	0.103903	0.146653	0.0886075	0.145697
0.135122	0.133521	0.151079	0.171172	0.17561	0.136693	0.158907	0.13849	0.14849	0.156876	0.188892	0.180142	0.157833	0.165157	0.133881	0.172318	0.12849	0.133881	0.156583	0.167075	0.138423	0.1427	0.138423	0.137173	0.140053	0.151172	0.137173	0.16974	0.138423	0.131114	0.16586	0.159926	0.173423	0.1777	0.142329	0.1679	0.135122	0.149888	0.157173	0.14345	0.134457	0.189984	0.174083	0.184613	0.134457	0.169984	0.142173	0.162024	0.169551	0.179922
0.0814364	0.1142	0.116573	0.16753	0.0871721	0.106193	0.0843183	0.119787	0.0777905	0.204116	0.0612346	0.132511	0.083205	0.237866	0.106506	0.149162	0.0855683	0.106506	0.086955	0.123311	0.0934481	0.164197	0.0797762	0.0871981	0.109475	0.14003	0.0735262	0.143537	0.0934481	0.126261	0.0949433	0.210921	0.0881096	0.17128	0.101026	0.255122	0.0814364	0.0917489	0.0871981	0.169116	0.159359	0.248441	0.093205	0.236234	0.159359	0.220941	0.0821981	0.220698	0.0639082	0.148225
0.18697	0.199666	0.209724	0.230399	0.210766	0.193871	0.201033	0.207387	0.184227	0.194614	0.18561	0.216287	0.198318	0.226333	0.198559	0.222934	0.181449	0.198559	0.204568	0.208142	0.19613	0.233038	0.184412	0.18738	0.193949	0.210399	0.175662	0.216137	0.19613	0.206981	0.204705	0.218787	0.216078	0.257205	0.196755	0.230187	0.18697	0.183455	0.17738	0.172485	0.17738	0.247205	0.199568	0.235974	0.17738	0.227205	0.17738	0.216137	0.18988	0.257205
0.137199	0.19792	0.222218	0.291374	0.153624	0.18002	0.152858	0.195567	0.162442	0.320854	0.153781	0.283156	0.167722	0.358511	0.165332	0.286895	0.142442	0.165332	0.156472	0.226027	0.150187	0.229152	0.134562	0.158937	0.215254	0.263874	0.143312	0.264317	0.150187	0.204128	0.195436	0.331566	0.139562	0.247902	0.189718	0.376879	0.137199	0.209464	0.218937	0.301965	0.261097	0.385062	0.207722	0.371879	0.261097	0.357562	0.183937	0.341477	0.112565	0.222624
0.114824	0.133379	0.150312	0.189173	0.135989	0.131638	0.128122	0.140622	0.123261	0.161796	0.13302	0.18	0.130329	0.185077	0.128201	0.182888	0.114372	0.128201	0.129079	0.158339	0.122656	0.165006	0.114843	0.121406	0.14156	0.166673	0.113593	0.174372	0.122656	0.142083	0.142888	0.176466	0.133177	0.184589	0.134375	0.19525	0.114824	0.138027	0.141406	0.149296	0.134122	0.212306	0.147829	0.203028	0.134122	0.189806	0.126406	0.182089	0.118611	0.173201
0.090766	0.13635	0.125903	0.197832	0.0994184	0.126009	0.0945507	0.136478	0.0891341	0.219695	0.0703559	0.144965	0.0903125	0.25032	0.123197	0.168978	0.0991341	0.123197	0.0940625	0.151391	0.105903	0.18936	0.0922309	0.0996527	0.12304	0.157832	0.0859809	0.172728	0.105903	0.140937	0.105176	0.229626	0.0972309	0.19936	0.113481	0.278063	0.090766	0.104204	0.0996527	0.185806	0.171813	0.27652	0.106562	0.264313	0.171813	0.23652	0.0946527	0.249888	0.0710156	0.161582
0.150668	0.150068	0.163656	0.192795	0.167667	0.158871	0.158689	0.167855	0.145217	0.157609	0.149698	0.170844	0.153396	0.18089	0.162934	0.180121	0.149105	0.162934	0.159646	0.171684	0.1585	0.197517	0.150687	0.14975	0.153793	0.170295	0.141937	0.179105	0.1585	0.168205	0.158454	0.174594	0.172354	0.212934	0.155219	0.189952	0.150668	0.143871	0.13975	0.138812	0.13975	0.202934	0.155896	0.193656	0.13975	0.180434	0.13975	0.179105	0.156677	0.203767
0.10135	0.144923	0.171721	0.211836	0.132372	0.125256	0.125621	0.137444	0.129648	0.277076	0.146747	0.230158	0.140054	0.305513	0.113069	0.220412	0.0985373	0.113069	0.128804	0.169319	0.108908	0.149058	0.0991428	0.117658	0.159631	0.194336	0.107893	0.196194	0.108908	0.14002	0.162339	0.273569	0.120809	0.179475	0.14258	0.310826	0.10135	0.165256	0.177658	0.252631	0.219819	0.316635	0.175054	0.306381	0.219819	0.299135	0.142658	0.273354	0.102476	0.175308
0.143788	0.169318	0.199511	0.226279	0.18649	0.156627	0.174101	0.16358	0.174795	0.245118	0.213209	0.257323	0.186229	0.262462	0.145064	0.240064	0.137017	0.145064	0.174979	0.202147	0.147792	0.161418	0.143886	0.156542	0.186392	0.211279	0.152636	0.21983	0.147792	0.160518	0.20496	0.245471	0.175552	0.200585	0.175604	0.262566	0.143788	0.20121	0.216542	0.233544	0.20469	0.283733	0.219979	0.276409	0.20469	0.268733	0.181542	0.242978	0.166229	0.205585
0.142859	0.180438	0.192996	0.269925	0.156512	0.183102	0.151644	0.193571	0.151227	0.19148	0.137449	0.227058	0.152406	0.222105	0.17529	0.246071	0.151227	0.17529	0.151156	0.218484	0.157996	0.241453	0.144324	0.156746	0.190134	0.229925	0.143074	0.244821	0.157996	0.198031	0.172269	0.224558	0.149324	0.256453	0.175574	0.249848	0.142859	0.176297	0.176746	0.185739	0.161746	0.276453	0.178656	0.264246	0.161746	0.236453	0.161746	0.244821	0.123109	0.218675
0.163686	0.184354	0.204057	0.243894	0.183875	0.182453	0.176985	0.193391	0.172124	0.16148	0.177	0.233745	0.180168	0.188668	0.179016	0.23761	0.163235	0.179016	0.178918	0.209155	0.172495	0.219728	0.162729	0.171245	0.194329	0.221394	0.161479	0.227141	0.172495	0.195828	0.193703	0.191631	0.181062	0.239311	0.186167	0.198841	0.163686	0.188842	0.191245	0.160554	0.145381	0.228447	0.197668	0.218193	0.145381	0.205947	0.176245	0.196277	0.16259	0.227922
0.104407	0.152	0.174778	0.22017	0.141262	0.130952	0.13215	0.141889	0.135066	0.282633	0.154387	0.234465	0.145333	0.30982	0.117514	0.226108	0.101733	0.117514	0.134083	0.179875	0.113215	0.153782	0.10345	0.121965	0.162827	0.19767	0.1122	0.205639	0.113215	0.142104	0.168868	0.280376	0.12845	0.190032	0.146887	0.317772	0.104407	0.169563	0.181965	0.257077	0.224126	0.327192	0.182833	0.316938	0.224126	0.304692	0.146965	0.2828	0.107755	0.183087
0.161156	0.162076	0.174144	0.191338	0.182321	0.163387	0.172371	0.173621	0.156677	0.265905	0.165603	0.180082	0.168328	0.290437	0.168699	0.184637	0.156121	0.168699	0.174578	0.174672	0.167738	0.196338	0.159926	0.158988	0.160809	0.173838	0.151176	0.179871	0.167738	0.172998	0.172137	0.258492	0.188259	0.215922	0.164457	0.293527	0.161156	0.153109	0.148988	0.221739	0.226149	0.283082	0.168328	0.273805	0.226149	0.265582	0.148988	0.257032	0.17161	0.216199
0.156944	0.22079	0.241963	0.32098	0.192953	0.204695	0.184617	0.217117	0.189756	0.256572	0.189984	0.306026	0.196355	0.291103	0.186883	0.31157	0.160867	0.186883	0.185105	0.264522	0.173057	0.248063	0.157432	0.181807	0.23368	0.28098	0.166182	0.298367	0.173057	0.218109	0.227195	0.291242	0.175765	0.286397	0.212588	0.314401	0.156944	0.232334	0.241807	0.254072	0.214523	0.354113	0.242605	0.340929	0.214523	0.314113	0.206807	0.306083	0.141199	0.257508
0.201669	0.212724	0.222157	0.257684	0.242834	0.214316	0.225801	0.220801	0.209273	0.213579	0.227365	0.239345	0.220508	0.23436	0.213379	0.245566	0.197051	0.213379	0.224258	0.245184	0.212001	0.241851	0.204188	0.205751	0.209238	0.225184	0.197938	0.249551	0.212001	0.213095	0.230566	0.235379	0.242522	0.281434	0.21372	0.245367	0.201669	0.207372	0.205751	0.194042	0.193035	0.273718	0.233008	0.264441	0.193035	0.241218	0.200751	0.241835	0.218789	0.273379
0.130386	0.181477	0.20564	0.247565	0.172931	0.156662	0.162573	0.169552	0.163268	0.309588	0.18215	0.265327	0.176733	0.340682	0.143224	0.255724	0.12549	0.143224	0.165483	0.207808	0.140171	0.178953	0.128452	0.148921	0.19049	0.225065	0.137202	0.233302	0.140171	0.168522	0.201245	0.311238	0.160119	0.22187	0.175796	0.346411	0.130386	0.197495	0.208921	0.281811	0.251081	0.359031	0.214233	0.3478	0.251081	0.336531	0.173921	0.310463	0.133296	0.21937
0.204502	0.238277	0.269991	0.306212	0.247751	0.224997	0.236065	0.234607	0.236759	0.250101	0.265407	0.329053	0.248897	0.274007	0.212185	0.316247	0.198982	0.212185	0.237647	0.274268	0.211709	0.238851	0.203897	0.220459	0.256169	0.286212	0.212647	0.295857	0.211709	0.232248	0.27083	0.273405	0.235564	0.280518	0.243428	0.277861	0.204502	0.26708	0.280459	0.252415	0.222311	0.31737	0.285147	0.308092	0.222311	0.29737	0.245459	0.272708	0.217178	0.280518
0.104838	0.175422	0.177475	0.268571	0.11599	0.155915	0.114456	0.166383	0.124873	0.213551	0.111928	0.234037	0.122718	0.244176	0.140602	0.248883	0.11654	0.140602	0.113968	0.202963	0.119975	0.213432	0.106303	0.126225	0.177946	0.228571	0.112553	0.240133	0.119975	0.174176	0.150081	0.239685	0.101303	0.225932	0.152553	0.275253	0.104838	0.168276	0.176225	0.211699	0.169373	0.29908	0.163968	0.286873	0.169373	0.25908	0.146225	0.263281	0.078421	0.181487
0.181729	0.203548	0.216866	0.249212	0.201632	0.197181	0.194472	0.212024	0.182389	0.191569	0.176944	0.231553	0.194609	0.226569	0.198743	0.240149	0.179056	0.198743	0.198359	0.216104	0.192491	0.242823	0.178819	0.186241	0.202962	0.226712	0.172569	0.230774	0.192491	0.214192	0.205097	0.222587	0.203819	0.264073	0.200069	0.23452	0.181729	0.190792	0.186241	0.176476	0.173525	0.256357	0.202109	0.24415	0.173525	0.233857	0.181241	0.223058	0.175312	0.257129
0.180247	0.231558	0.255501	0.325898	0.228209	0.220759	0.214588	0.229275	0.216393	0.267891	0.233053	0.319564	0.224373	0.29461	0.202947	0.319822	0.180838	0.202947	0.213123	0.283919	0.194407	0.249648	0.182689	0.203157	0.245838	0.285898	0.191439	0.310525	0.194407	0.22498	0.253259	0.297064	0.211022	0.297982	0.230032	0.314575	0.180247	0.251732	0.263157	0.264373	0.228157	0.357982	0.270623	0.346751	0.228157	0.317982	0.228157	0.310525	0.180935	0.275759
0.217125	0.226035	0.237613	0.281335	0.252874	0.23387	0.237438	0.239729	0.223132	0.200192	0.23678	0.255426	0.23152	0.220349	0.232307	0.26512	0.215354	0.232307	0.23527	0.264391	0.228082	0.266474	0.22027	0.221832	0.227542	0.246335	0.21402	0.270979	0.228082	0.23362	0.242203	0.229562	0.251936	0.300641	0.229801	0.235453	0.217125	0.223453	0.221832	0.189822	0.185968	0.269777	0.24527	0.260499	0.185968	0.234777	0.216832	0.240115	0.229801	0.285641
0.17788	0.232199	0.258017	0.320363	0.217782	0.215831	0.208123	0.228175	0.21104	0.363059	0.220595	0.320204	0.22076	0.395559	0.199894	0.3188	0.177706	0.199894	0.20951	0.272255	0.191142	0.248974	0.17747	0.199892	0.246613	0.287863	0.18622	0.301925	0.191142	0.227843	0.248748	0.371115	0.20247	0.290224	0.22872	0.41101	0.17788	0.249442	0.259892	0.337504	0.302052	0.427384	0.26326	0.415177	0.302052	0.394884	0.224892	0.379086	0.171463	0.273279
0.156989	0.166524	0.184977	0.207171	0.183154	0.16422	0.173204	0.174454	0.16251	0.18143	0.176436	0.205915	0.174161	0.205961	0.164532	0.20547	0.151954	0.164532	0.175411	0.185505	0.163571	0.192171	0.155758	0.159821	0.171642	0.189671	0.152008	0.195704	0.163571	0.173831	0.18297	0.197165	0.184092	0.216755	0.17029	0.209051	0.156989	0.168942	0.169821	0.165411	0.159821	0.226755	0.184161	0.217477	0.159821	0.209255	0.159821	0.195704	0.167443	0.217032
0.153306	0.190022	0.198559	0.268679	0.190434	0.188679	0.176674	0.195944	0.16959	0.203449	0.174028	0.233872	0.175209	0.228918	0.179616	0.247741	0.156257	0.179616	0.173959	0.234477	0.168716	0.23104	0.156997	0.167466	0.191257	0.223679	0.155747	0.252194	0.168716	0.191511	0.195345	0.233872	0.181997	0.26854	0.184341	0.253745	0.153306	0.18604	0.187466	0.191042	0.172466	0.28854	0.203959	0.277309	0.172466	0.24354	0.172466	0.252194	0.151771	0.239095
0.164943	0.179968	0.200431	0.238597	0.194025	0.18141	0.183311	0.189769	0.176227	0.193102	0.190431	0.230743	0.184893	0.215759	0.177347	0.23266	0.162894	0.177347	0.183643	0.212208	0.1734	0.210958	0.165587	0.17215	0.190081	0.213597	0.164337	0.226019	0.1734	0.188382	0.198076	0.213027	0.190587	0.238458	0.185118	0.225585	0.164943	0.188771	0.19215	0.18301	0.169433	0.250742	0.203643	0.241465	0.169433	0.225742	0.17715	0.218303	0.173174	0.229014
0.137102	0.154187	0.15759	0.217701	0.162017	0.162041	0.149776	0.166651	0.139915	0.162793	0.144674	0.176653	0.142608	0.181699	0.159229	0.193291	0.141026	0.159229	0.146358	0.191868	0.149309	0.204784	0.141497	0.143059	0.153213	0.177701	0.135247	0.202901	0.149309	0.163736	0.154541	0.184153	0.15983	0.228118	0.151028	0.204998	0.137102	0.14468	0.143059	0.147608	0.138059	0.228118	0.158858	0.21884	0.138059	0.188118	0.138059	0.202901	0.140889	0.199229
0.15719	0.156083	0.172796	0.199708	0.176416	0.164065	0.167086	0.171722	0.156114	0.171905	0.167978	0.186858	0.163942	0.191905	0.166253	0.191409	0.155003	0.166253	0.167692	0.180003	0.163421	0.19568	0.157561	0.157171	0.163284	0.179708	0.151311	0.187972	0.163421	0.171719	0.169899	0.184358	0.179228	0.212347	0.163186	0.199092	0.15719	0.157815	0.157171	0.155608	0.152171	0.212347	0.170192	0.204046	0.152171	0.192347	0.152171	0.187972	0.168082	0.20568
0.102639	0.157498	0.175276	0.248455	0.120041	0.144757	0.117049	0.157101	0.124132	0.187541	0.117854	0.229963	0.127186	0.220041	0.13132	0.237726	0.109132	0.13132	0.118436	0.189514	0.115901	0.193733	0.102229	0.122151	0.170538	0.215955	0.108479	0.223351	0.115901	0.163436	0.152674	0.216429	0.107229	0.212483	0.148479	0.242159	0.102639	0.164202	0.172151	0.186985	0.149867	0.270199	0.164686	0.257992	0.149867	0.237699	0.142151	0.231067	0.0828887	0.182205
0.117613	0.135813	0.145601	0.193212	0.140028	0.137552	0.130287	0.144662	0.122926	0.148304	0.130185	0.169664	0.128119	0.16971	0.13474	0.178802	0.119037	0.13474	0.129369	0.164879	0.12732	0.175295	0.119508	0.12357	0.138724	0.163212	0.115758	0.178412	0.12732	0.144247	0.140052	0.167164	0.137841	0.196129	0.134039	0.185509	0.117613	0.132691	0.13357	0.135619	0.12357	0.206129	0.144369	0.196851	0.12357	0.176129	0.12357	0.178412	0.1214	0.17724
0.171666	0.216762	0.226685	0.30098	0.203508	0.212056	0.192812	0.223228	0.186839	0.223763	0.17929	0.261998	0.1933	0.257044	0.202994	0.278931	0.175728	0.202994	0.19205	0.256744	0.189029	0.264452	0.173404	0.187779	0.218541	0.25598	0.172154	0.279478	0.189029	0.221859	0.21539	0.261998	0.195071	0.298619	0.20856	0.282982	0.171666	0.208306	0.207779	0.212467	0.192779	0.318619	0.22205	0.305435	0.192779	0.273619	0.192779	0.279478	0.158144	0.266952
0.206151	0.212324	0.221757	0.25853	0.24496	0.217957	0.228061	0.222488	0.212644	0.197023	0.233398	0.238944	0.221792	0.213898	0.217019	0.245301	0.202644	0.217019	0.225542	0.247714	0.215507	0.243808	0.209648	0.209257	0.210926	0.22603	0.203398	0.251238	0.215507	0.214917	0.230874	0.219546	0.244648	0.280058	0.215273	0.226016	0.206151	0.209901	0.209257	0.183227	0.181109	0.25691	0.234292	0.248609	0.181109	0.22441	0.204257	0.22809	0.225932	0.26978
0.176565	0.231812	0.244319	0.311522	0.229944	0.21423	0.213475	0.222121	0.210559	0.355768	0.229163	0.301507	0.220135	0.381862	0.198293	0.303293	0.175559	0.198293	0.211385	0.276487	0.191351	0.2418	0.179632	0.197601	0.233059	0.269022	0.185882	0.298371	0.191351	0.214979	0.247147	0.362417	0.214632	0.29555	0.221976	0.40148	0.176565	0.238675	0.247601	0.324379	0.294761	0.42271	0.262635	0.41148	0.294761	0.38021	0.217601	0.375532	0.181698	0.275272
0.223656	0.236096	0.244144	0.277449	0.268154	0.235192	0.25001	0.241676	0.232371	0.275689	0.252686	0.261331	0.244717	0.29647	0.234255	0.266442	0.217926	0.234255	0.248467	0.267171	0.233988	0.260505	0.226175	0.227738	0.230114	0.244949	0.219925	0.270426	0.233988	0.232859	0.254775	0.28823	0.267842	0.303421	0.235706	0.306366	0.223656	0.229359	0.227738	0.245782	0.245886	0.326569	0.257217	0.317292	0.245886	0.294069	0.222738	0.293575	0.242998	0.297588
0.137802	0.172121	0.187939	0.251396	0.151038	0.171309	0.146934	0.183653	0.145406	0.282981	0.13385	0.220126	0.149571	0.315481	0.165372	0.234278	0.143184	0.165372	0.148321	0.202177	0.151064	0.225563	0.137392	0.149814	0.18209	0.218896	0.136142	0.227403	0.151064	0.188876	0.167559	0.291037	0.145725	0.240146	0.168642	0.336488	0.137802	0.169365	0.169814	0.252981	0.231974	0.337306	0.172071	0.325099	0.231974	0.304806	0.154814	0.304563	0.120274	0.21209
0.162339	0.161739	0.175327	0.204465	0.179337	0.170542	0.170359	0.179526	0.156887	0.269588	0.161369	0.182514	0.165067	0.292869	0.174604	0.191792	0.160776	0.174604	0.171317	0.183354	0.170171	0.209188	0.162358	0.161421	0.165464	0.181965	0.153608	0.190776	0.170171	0.179876	0.170125	0.263425	0.184025	0.224604	0.166889	0.301932	0.162339	0.155542	0.151421	0.227644	0.228581	0.291765	0.167567	0.282487	0.228581	0.269265	0.151421	0.267937	0.168348	0.215438
0.180247	0.231558	0.255501	0.325898	0.228209	0.220759	0.214588	0.229275	0.216393	0.267891	0.233053	0.319564	0.224373	0.29461	0.202947	0.319822	0.180838	0.202947	0.213123	0.283919	0.194407	0.249648	0.182689	0.203157	0.245838	0.285898	0.191439	0.310525	0.194407	0.22498	0.253259	0.297064	0.211022	0.297982	0.230032	0.314575	0.180247	0.251732	0.263157	0.264373	0.228157	0.357982	0.270623	0.346751	0.228157	0.317982	0.228157	0.310525	0.180935	0.275759
0.217125	0.226035	0.237613	0.281335	0.252874	0.23387	0.237438	0.239729	0.223132	0.200192	0.23678	0.255426	0.23152	0.220349	0.232307	0.26512	0.215354	0.232307	0.23527	0.264391	0.228082	0.266474	0.22027	0.221832	0.227542	0.246335	0.21402	0.270979	0.228082	0.23362	0.242203	0.229562	0.251936	0.300641	0.229801	0.235453	0.217125	0.223453	0.221832	0.189822	0.185968	0.269777	0.24527	0.260499	0.185968	0.234777	0.216832	0.240115	0.229801	0.285641
0.158816	0.20055	0.208953	0.272549	0.192468	0.192392	0.180934	0.202861	0.173851	0.307745	0.173406	0.243015	0.181696	0.33837	0.18458	0.255361	0.160517	0.18458	0.180446	0.234441	0.173953	0.23741	0.160281	0.172703	0.199424	0.232549	0.159031	0.254111	0.173953	0.200654	0.201559	0.317676	0.185281	0.27241	0.191531	0.359447	0.158816	0.192254	0.192703	0.27219	0.254863	0.36957	0.207946	0.357363	0.254863	0.32957	0.177703	0.331272	0.152399	0.247965
0.19477	0.204305	0.222758	0.236063	0.234269	0.197556	0.219874	0.207791	0.204735	0.319519	0.22755	0.243696	0.220831	0.344051	0.197869	0.238806	0.185291	0.197869	0.222081	0.223286	0.201352	0.216619	0.19354	0.197602	0.204978	0.218563	0.18979	0.229041	0.201352	0.202724	0.22964	0.312106	0.235206	0.254536	0.208071	0.342697	0.19477	0.206723	0.207602	0.275908	0.274763	0.341696	0.230831	0.332419	0.274763	0.324196	0.197602	0.306201	0.214112	0.263702
0.18035	0.214414	0.228222	0.29542	0.227623	0.214048	0.210663	0.219361	0.203857	0.249549	0.220123	0.271034	0.210722	0.271111	0.202486	0.279205	0.18108	0.202486	0.206972	0.267069	0.194784	0.245559	0.185018	0.196034	0.219673	0.25042	0.186268	0.283111	0.194784	0.211728	0.232382	0.27375	0.216685	0.292225	0.213456	0.293715	0.18035	0.221132	0.226034	0.235104	0.21375	0.329942	0.244472	0.319688	0.21375	0.284941	0.206034	0.290827	0.188143	0.267225
0.258136	0.281066	0.293624	0.343179	0.311384	0.280297	0.291365	0.284906	0.278726	0.263703	0.30404	0.327686	0.289197	0.282609	0.272484	0.331547	0.254281	0.272484	0.287947	0.327901	0.270343	0.302484	0.26253	0.269093	0.281469	0.303179	0.26128	0.336156	0.270343	0.274214	0.30613	0.294322	0.304197	0.354151	0.282061	0.29813	0.258136	0.285714	0.289093	0.254999	0.243228	0.343287	0.315447	0.33401	0.243228	0.303287	0.274093	0.305292	0.277478	0.340818
0.117682	0.162406	0.175318	0.242109	0.145917	0.154105	0.13723	0.165199	0.134869	0.195114	0.13248	0.216256	0.141117	0.226364	0.144418	0.227074	0.12098	0.144418	0.137367	0.197057	0.132193	0.200442	0.118522	0.133443	0.167387	0.204609	0.119772	0.221449	0.132193	0.165839	0.162855	0.222938	0.136855	0.230025	0.154772	0.247788	0.117682	0.160494	0.163443	0.182799	0.158876	0.275458	0.171117	0.263251	0.158876	0.237958	0.143443	0.236881	0.10682	0.203637
0.158563	0.177473	0.194051	0.24944	0.189312	0.183641	0.177209	0.189501	0.171237	0.191723	0.183218	0.226864	0.176291	0.211879	0.177079	0.234891	0.160126	0.177079	0.175041	0.220829	0.16952	0.217912	0.161708	0.16827	0.187313	0.21444	0.160458	0.235751	0.16952	0.186725	0.191975	0.214148	0.183374	0.247079	0.181239	0.230317	0.158563	0.184891	0.18827	0.182742	0.165554	0.259363	0.200041	0.250085	0.165554	0.224363	0.17327	0.228034	0.164572	0.225412
0.0845593	0.127995	0.127548	0.173492	0.121975	0.106165	0.1089	0.113275	0.103205	0.13525	0.122131	0.16661	0.111732	0.156656	0.0983527	0.167415	0.0826496	0.0983527	0.107982	0.146825	0.0942663	0.132242	0.0864538	0.0955163	0.117337	0.143492	0.0877038	0.162025	0.0942663	0.109527	0.128665	0.15411	0.114787	0.168075	0.110985	0.169122	0.0845593	0.119637	0.125516	0.124232	0.105516	0.198075	0.137982	0.188798	0.105516	0.168075	0.105516	0.162025	0.0950129	0.155853
0.170197	0.179832	0.20342	0.233938	0.209149	0.181161	0.194884	0.186239	0.188079	0.215185	0.218993	0.240607	0.197638	0.230653	0.175223	0.234598	0.165301	0.175223	0.193888	0.217306	0.176076	0.195327	0.17217	0.177326	0.192176	0.211438	0.17342	0.227489	0.176076	0.181302	0.210744	0.224357	0.203836	0.230744	0.188888	0.236383	0.170197	0.199494	0.207326	0.203055	0.187326	0.260744	0.220138	0.25342	0.187326	0.238244	0.187326	0.227489	0.192638	0.228244
0.0823291	0.136766	0.137349	0.195116	0.104588	0.114456	0.0981277	0.128753	0.0932666	0.228485	0.0834945	0.169536	0.101741	0.264891	0.108518	0.181331	0.0843777	0.108518	0.100491	0.148657	0.0965674	0.165949	0.0809424	0.0953174	0.12719	0.162616	0.0796924	0.172503	0.0965674	0.131619	0.120706	0.240447	0.0992757	0.190532	0.116099	0.282565	0.0823291	0.115845	0.115317	0.195151	0.177478	0.287693	0.124241	0.274509	0.177478	0.255193	0.100317	0.249663	0.0665847	0.169143
0.223076	0.24699	0.265713	0.301392	0.257978	0.241444	0.246236	0.255038	0.233319	0.245416	0.237041	0.28915	0.247622	0.279166	0.239257	0.294413	0.218319	0.239257	0.248872	0.272451	0.235088	0.27917	0.221416	0.231338	0.249725	0.273892	0.217666	0.286288	0.235088	0.252622	0.261861	0.277684	0.256416	0.31542	0.247666	0.287534	0.223076	0.243388	0.241338	0.22949	0.223622	0.317704	0.262622	0.305497	0.223622	0.290204	0.231338	0.278572	0.223326	0.310142
0.0984906	0.146458	0.13851	0.187527	0.1145	0.123742	0.108664	0.138664	0.0988031	0.143149	0.084031	0.155073	0.107902	0.180181	0.12343	0.170617	0.0999142	0.12343	0.111652	0.146069	0.112104	0.17961	0.0964789	0.105854	0.127727	0.157527	0.0902289	0.164914	0.112104	0.142156	0.121242	0.173005	0.114812	0.197944	0.121635	0.195979	0.0984906	0.111381	0.105854	0.123335	0.116286	0.213376	0.119152	0.200192	0.116286	0.183376	0.100854	0.180346	0.0827462	0.179055
0.248202	0.257485	0.273573	0.295077	0.28339	0.255302	0.269834	0.26624	0.253306	0.27615	0.266515	0.28826	0.268017	0.303337	0.256865	0.290459	0.241084	0.256865	0.271767	0.27867	0.25701	0.284243	0.247245	0.25076	0.257177	0.272577	0.240995	0.28499	0.25701	0.26201	0.276552	0.294726	0.285578	0.318827	0.260682	0.306844	0.248202	0.253358	0.25076	0.251983	0.253476	0.326543	0.275517	0.316289	0.253476	0.304043	0.24576	0.292706	0.260439	0.320771
0.0845593	0.127995	0.127548	0.173492	0.121975	0.106165	0.1089	0.113275	0.103205	0.13525	0.122131	0.16661	0.111732	0.156656	0.0983527	0.167415	0.0826496	0.0983527	0.107982	0.146825	0.0942663	0.132242	0.0864538	0.0955163	0.117337	0.143492	0.0877038	0.162025	0.0942663	0.109527	0.128665	0.15411	0.114787	0.168075	0.110985	0.169122	0.0845593	0.119637	0.125516	0.124232	0.105516	0.198075	0.137982	0.188798	0.105516	0.168075	0.105516	0.162025	0.0950129	0.155853
0.170197	0.179832	0.20342	0.233938	0.209149	0.181161	0.194884	0.186239	0.188079	0.215185	0.218993	0.240607	0.197638	0.230653	0.175223	0.234598	0.165301	0.175223	0.193888	0.217306	0.176076	0.195327	0.17217	0.177326	0.192176	0.211438	0.17342	0.227489	0.176076	0.181302	0.210744	0.224357	0.203836	0.230744	0.188888	0.236383	0.170197	0.199494	0.207326	0.203055	0.187326	0.260744	0.220138	0.25342	0.187326	0.238244	0.187326	0.227489	0.192638	0.228244
0.133284	0.167891	0.173304	0.24246	0.13971	0.168605	0.136444	0.181652	0.131027	0.181693	0.107366	0.191741	0.133807	0.216849	0.166418	0.21548	0.141027	0.166418	0.137557	0.192112	0.148772	0.235237	0.133147	0.142522	0.16884	0.20496	0.126897	0.215402	0.148772	0.187713	0.149022	0.213423	0.138147	0.243987	0.158304	0.242717	0.133284	0.14805	0.142522	0.166323	0.152955	0.259419	0.148807	0.246236	0.152955	0.221919	0.137522	0.230834	0.108651	0.20871
0.18667	0.214622	0.22669	0.26529	0.211429	0.206714	0.202885	0.22226	0.189691	0.199986	0.181586	0.242627	0.202749	0.237643	0.207026	0.253589	0.184135	0.207026	0.206499	0.230498	0.199658	0.25529	0.184033	0.193408	0.211948	0.23779	0.177783	0.24601	0.199658	0.223044	0.215464	0.236161	0.212367	0.282373	0.20919	0.248233	0.18667	0.198936	0.193408	0.183783	0.180692	0.274657	0.212749	0.261474	0.180692	0.247157	0.188408	0.238294	0.177592	0.272651
0.151211	0.202032	0.226465	0.285612	0.195423	0.186098	0.183676	0.196488	0.185482	0.335413	0.202142	0.288652	0.195336	0.364007	0.17016	0.28516	0.149926	0.17016	0.184086	0.243633	0.163496	0.213112	0.151777	0.172246	0.214926	0.253112	0.160527	0.270239	0.163496	0.194069	0.222348	0.339563	0.18011	0.257695	0.199121	0.378347	0.151211	0.22082	0.232246	0.308747	0.274406	0.394856	0.237836	0.383625	0.274406	0.362356	0.197246	0.347399	0.151899	0.242973
0.231414	0.23068	0.244403	0.272152	0.264247	0.238923	0.249574	0.246658	0.231658	0.230824	0.245028	0.25284	0.243031	0.252856	0.241736	0.260173	0.226658	0.241736	0.249281	0.25993	0.240497	0.26993	0.232684	0.231747	0.231345	0.244652	0.223934	0.262908	0.240497	0.241312	0.24934	0.251374	0.267684	0.30118	0.237215	0.261224	0.231414	0.225868	0.221747	0.209899	0.21403	0.283464	0.248031	0.274187	0.21403	0.255964	0.221747	0.255191	0.246312	0.295902
0.128923	0.167208	0.194411	0.262717	0.158422	0.16546	0.150277	0.171944	0.157638	0.230926	0.172953	0.256599	0.159984	0.251707	0.149522	0.25671	0.133194	0.149522	0.148734	0.217439	0.139255	0.195772	0.131443	0.148005	0.190382	0.230217	0.140193	0.245694	0.139255	0.173127	0.185043	0.245781	0.143109	0.223689	0.170974	0.271603	0.128923	0.194626	0.208005	0.228333	0.188437	0.299121	0.202484	0.289844	0.188437	0.266621	0.173005	0.261126	0.128266	0.197856
0.17547	0.17786	0.195959	0.214958	0.207052	0.179854	0.194255	0.189463	0.178838	0.211223	0.194709	0.210021	0.192087	0.235129	0.182041	0.211104	0.168838	0.182041	0.195837	0.200236	0.182677	0.206486	0.174865	0.176427	0.181026	0.194958	0.168615	0.205713	0.182677	0.185993	0.199021	0.222953	0.209865	0.236486	0.184396	0.237872	0.17547	0.178048	0.176427	0.185852	0.186859	0.251918	0.198337	0.242641	0.186859	0.231918	0.171427	0.221145	0.190368	0.238708
0.144535	0.186269	0.194672	0.256046	0.181521	0.177001	0.168876	0.187469	0.160681	0.193156	0.162459	0.228735	0.169637	0.223781	0.169188	0.239969	0.145126	0.169188	0.168387	0.22016	0.159672	0.219796	0.146	0.158422	0.184032	0.216046	0.14475	0.238719	0.159672	0.184151	0.189501	0.226235	0.174334	0.258129	0.17725	0.243746	0.144535	0.177973	0.178422	0.179637	0.163422	0.278129	0.195887	0.265922	0.163422	0.238129	0.163422	0.238719	0.140341	0.235907
0.210981	0.234792	0.248735	0.280521	0.25811	0.225938	0.241432	0.236953	0.225182	0.233594	0.240454	0.272797	0.241218	0.262813	0.223125	0.275	0.203516	0.223125	0.242468	0.262153	0.222641	0.253715	0.210922	0.218891	0.231016	0.250521	0.207172	0.270703	0.222641	0.229603	0.255104	0.262581	0.255922	0.301215	0.233266	0.269723	0.210981	0.229965	0.228891	0.214335	0.211175	0.303499	0.257468	0.292269	0.211175	0.273499	0.218891	0.262987	0.22278	0.300104
0.131187	0.185794	0.201207	0.275918	0.15428	0.174286	0.148792	0.187333	0.151153	0.189504	0.141936	0.249644	0.156155	0.22466	0.162099	0.261161	0.136708	0.162099	0.149905	0.220016	0.146676	0.226474	0.131051	0.150426	0.194521	0.238418	0.134801	0.251083	0.146676	0.191172	0.18137	0.228178	0.142717	0.251891	0.176207	0.248306	0.131187	0.185953	0.190426	0.188855	0.15771	0.284175	0.191155	0.270991	0.15771	0.246674	0.165426	0.243367	0.110999	0.221057
0.170155	0.196466	0.215409	0.248028	0.194784	0.186778	0.187273	0.200294	0.18019	0.157645	0.184628	0.244471	0.192058	0.189363	0.183966	0.245841	0.166856	0.183966	0.190808	0.213827	0.179315	0.222889	0.167596	0.178065	0.201856	0.228028	0.166346	0.231544	0.179315	0.20211	0.205945	0.193391	0.192596	0.247889	0.19494	0.19544	0.170155	0.196639	0.198065	0.156811	0.144485	0.229309	0.208308	0.218079	0.144485	0.209309	0.183065	0.192964	0.168621	0.243445
0.212145	0.232171	0.247634	0.309133	0.261227	0.240279	0.24218	0.243638	0.231763	0.290429	0.252634	0.282946	0.238762	0.308085	0.231217	0.291529	0.211763	0.231217	0.237512	0.289411	0.225602	0.268161	0.21779	0.224352	0.238951	0.264133	0.21654	0.299888	0.225602	0.233918	0.256946	0.306094	0.25279	0.315661	0.237321	0.329578	0.212145	0.240974	0.244352	0.267744	0.252501	0.358809	0.267512	0.349532	0.252501	0.313809	0.229352	0.323037	0.227043	0.292883
0.234671	0.246436	0.262659	0.310408	0.277503	0.254679	0.26033	0.259914	0.247414	0.269111	0.265784	0.288596	0.256287	0.288643	0.249992	0.295929	0.232414	0.249992	0.257537	0.293186	0.246253	0.283186	0.23844	0.242503	0.252101	0.272908	0.23469	0.301164	0.246253	0.252069	0.270096	0.289846	0.27344	0.324436	0.252971	0.304511	0.234671	0.251624	0.252503	0.250871	0.242503	0.334436	0.276287	0.325159	0.242503	0.296936	0.242503	0.301164	0.249569	0.309158
0.186327	0.230174	0.241347	0.303697	0.222336	0.220746	0.210668	0.233168	0.202473	0.336233	0.199368	0.275409	0.212406	0.370764	0.212933	0.287621	0.186918	0.212933	0.211156	0.263905	0.202441	0.267447	0.186816	0.201191	0.22973	0.263697	0.185566	0.284418	0.202441	0.230826	0.233246	0.35007	0.215149	0.30578	0.221972	0.390729	0.186327	0.221718	0.221191	0.299566	0.283351	0.402941	0.238656	0.389757	0.283351	0.362941	0.206191	0.361578	0.17725	0.283558
0.185931	0.194352	0.20642	0.238892	0.21793	0.197051	0.204369	0.204786	0.190063	0.235465	0.203711	0.222357	0.200326	0.257496	0.197364	0.228301	0.182286	0.197364	0.204076	0.221947	0.195013	0.22778	0.187201	0.188763	0.194473	0.211392	0.180951	0.228536	0.195013	0.200552	0.209135	0.246755	0.218868	0.258197	0.196732	0.266975	0.185931	0.190385	0.188763	0.208891	0.206912	0.281345	0.210326	0.272068	0.206912	0.253845	0.183763	0.251684	0.198607	0.250697
0.0960049	0.154898	0.166376	0.251352	0.12161	0.142342	0.11479	0.148904	0.124373	0.282981	0.13036	0.230438	0.123598	0.305793	0.124529	0.237498	0.104373	0.124529	0.112348	0.197724	0.109188	0.18288	0.0994228	0.117938	0.165467	0.211352	0.108173	0.230154	0.109188	0.151411	0.151508	0.285099	0.104423	0.20788	0.14286	0.333536	0.0960049	0.165536	0.177938	0.264092	0.220099	0.34504	0.169848	0.334786	0.220099	0.30504	0.142938	0.307315	0.0860201	0.170102
0.169853	0.186313	0.190341	0.240035	0.203518	0.189584	0.188568	0.194818	0.175374	0.15417	0.186799	0.208779	0.182025	0.173701	0.187396	0.220834	0.169818	0.187396	0.185775	0.220868	0.181435	0.225035	0.173622	0.175185	0.182006	0.202535	0.167372	0.228568	0.181435	0.189195	0.193334	0.184164	0.201956	0.257118	0.183154	0.191792	0.169853	0.176806	0.175185	0.144911	0.139321	0.226254	0.197025	0.216977	0.139321	0.188754	0.170185	0.197704	0.180306	0.237396
0.128483	0.152174	0.163972	0.229777	0.150482	0.15877	0.141087	0.164004	0.138449	0.273233	0.143763	0.197409	0.139545	0.292764	0.151582	0.21002	0.134004	0.151582	0.138295	0.194499	0.140065	0.200332	0.132253	0.138815	0.161192	0.192277	0.131003	0.212754	0.140065	0.163937	0.155853	0.27082	0.143919	0.220749	0.151784	0.31641	0.128483	0.155436	0.158815	0.242122	0.220976	0.317909	0.164544	0.308632	0.220976	0.280409	0.143815	0.289915	0.127826	0.189916
0.144039	0.156834	0.172027	0.212138	0.163954	0.160228	0.155462	0.168587	0.148101	0.162199	0.15536	0.194839	0.154544	0.184855	0.158665	0.201478	0.144212	0.158665	0.155794	0.183804	0.152496	0.196721	0.144683	0.148746	0.1639	0.187138	0.140933	0.197337	0.152496	0.169423	0.165228	0.182123	0.163016	0.215054	0.159214	0.196903	0.144039	0.157867	0.158746	0.151828	0.14103	0.217338	0.168294	0.208061	0.14103	0.192338	0.148746	0.189621	0.147826	0.201165
0.153668	0.18488	0.193688	0.250205	0.172177	0.18267	0.165092	0.196342	0.155231	0.281074	0.140459	0.2115	0.16308	0.316855	0.181107	0.229545	0.156342	0.181107	0.16683	0.208746	0.168532	0.239788	0.152907	0.162282	0.184154	0.215205	0.146657	0.227592	0.168532	0.198584	0.17767	0.293661	0.17124	0.260621	0.178063	0.336404	0.153668	0.167809	0.162282	0.242741	0.234442	0.337782	0.17683	0.324598	0.234442	0.302782	0.157282	0.304752	0.137924	0.236732
0.197615	0.205275	0.218103	0.256547	0.22753	0.211721	0.214455	0.21883	0.201261	0.15812	0.212686	0.234665	0.209787	0.179527	0.211408	0.242971	0.195705	0.211408	0.213537	0.23738	0.207322	0.245297	0.199509	0.201072	0.207892	0.226547	0.193259	0.24508	0.207322	0.215082	0.219221	0.190869	0.227843	0.27363	0.20904	0.191992	0.197615	0.202693	0.201072	0.153491	0.149775	0.227334	0.221037	0.218057	0.149775	0.197334	0.196072	0.198784	0.208068	0.261408
0.148569	0.169795	0.171323	0.22047	0.177781	0.169706	0.164784	0.178847	0.14909	0.265271	0.14825	0.18226	0.157694	0.292615	0.170018	0.198768	0.148534	0.170018	0.163944	0.195991	0.162104	0.21547	0.150385	0.153354	0.161034	0.18297	0.141635	0.205097	0.162104	0.175177	0.168456	0.270671	0.178719	0.245053	0.162729	0.310705	0.148569	0.149428	0.143354	0.221105	0.220514	0.312214	0.167694	0.300983	0.220514	0.274714	0.143354	0.282257	0.149257	0.225331
0.179178	0.180216	0.187284	0.231279	0.214654	0.193345	0.197616	0.196626	0.18081	0.292951	0.196841	0.198221	0.187596	0.308576	0.193658	0.210689	0.178033	0.193658	0.193846	0.220741	0.189784	0.225168	0.183925	0.181034	0.178814	0.193779	0.175175	0.222876	0.189784	0.188916	0.195428	0.286632	0.215591	0.258085	0.18455	0.325556	0.179178	0.174178	0.171034	0.247674	0.248194	0.325245	0.197596	0.316944	0.248194	0.287745	0.171034	0.300037	0.196737	0.240585
0.141697	0.204023	0.234216	0.302122	0.159373	0.185143	0.159232	0.201315	0.171315	0.233794	0.165154	0.302029	0.17722	0.272075	0.168581	0.302018	0.146315	0.168581	0.16347	0.234275	0.15406	0.23115	0.138435	0.16531	0.226627	0.277122	0.149685	0.275065	0.15406	0.210501	0.20681	0.267029	0.143435	0.25115	0.198591	0.288568	0.141697	0.223338	0.23531	0.240553	0.19531	0.32115	0.22097	0.307966	0.19531	0.29615	0.19531	0.275065	0.117064	0.228372
0.138943	0.159494	0.176697	0.212789	0.158989	0.156053	0.151964	0.168943	0.143492	0.157806	0.143208	0.198885	0.153624	0.1889	0.155115	0.205115	0.137381	0.155115	0.154874	0.178865	0.148728	0.197511	0.13701	0.144978	0.164881	0.190289	0.13326	0.195193	0.148728	0.171246	0.165636	0.184919	0.158676	0.217928	0.159353	0.197963	0.138943	0.156053	0.154978	0.146325	0.137262	0.220212	0.166124	0.208981	0.137262	0.197712	0.144978	0.187477	0.135187	0.208761
0.0833508	0.104847	0.106105	0.155807	0.0842297	0.104766	0.0815105	0.116406	0.0735938	0.104776	0.0571984	0.114542	0.0769207	0.134619	0.107578	0.133828	0.0885938	0.107578	0.0831707	0.115773	0.0943859	0.163585	0.0826672	0.0856359	0.101094	0.128307	0.0739172	0.132656	0.0943859	0.123014	0.0851824	0.128508	0.0876672	0.164835	0.0950109	0.152987	0.0833508	0.0817102	0.0756359	0.08922	0.083352	0.162551	0.0819207	0.151321	0.083352	0.135051	0.0756359	0.140372	0.0684832	0.139557
0.140188	0.140111	0.148294	0.181733	0.163997	0.149077	0.151681	0.154858	0.137098	0.148652	0.148684	0.156731	0.144162	0.166777	0.15189	0.166421	0.138765	0.15189	0.150412	0.166751	0.148294	0.182844	0.142434	0.139544	0.139546	0.154233	0.133684	0.171108	0.148294	0.15187	0.149494	0.162981	0.167434	0.204094	0.143059	0.178479	0.140188	0.132688	0.129544	0.128745	0.129544	0.194094	0.149162	0.185794	0.129544	0.166594	0.129544	0.171108	0.153302	0.19215
0.121786	0.166578	0.161806	0.242211	0.131962	0.162732	0.126821	0.173904	0.121404	0.173945	0.0977431	0.182118	0.122309	0.207226	0.15867	0.209607	0.131404	0.15867	0.126059	0.191864	0.139149	0.231239	0.123524	0.132899	0.159217	0.197211	0.117274	0.215154	0.139149	0.17809	0.139399	0.20755	0.128524	0.243739	0.148681	0.238719	0.121786	0.138427	0.132899	0.158575	0.143331	0.259171	0.141059	0.245988	0.143331	0.214171	0.127899	0.230586	0.0971529	0.200961
0.163657	0.172703	0.184146	0.238145	0.170239	0.185541	0.164942	0.19265	0.159525	0.184348	0.155396	0.200708	0.160274	0.205754	0.185229	0.216791	0.169525	0.185229	0.164024	0.203423	0.173364	0.234673	0.165552	0.167114	0.181713	0.208145	0.159302	0.2189	0.173364	0.19668	0.169708	0.203208	0.170552	0.239673	0.175083	0.225998	0.163657	0.168736	0.167114	0.173607	0.162114	0.239673	0.171524	0.230396	0.162114	0.209673	0.162114	0.2189	0.158555	0.211895
0.149387	0.182537	0.207375	0.285125	0.172219	0.189396	0.165047	0.19463	0.17213	0.243889	0.1805	0.263313	0.171004	0.263421	0.174708	0.270646	0.15713	0.174708	0.162254	0.237903	0.160969	0.227903	0.153156	0.167219	0.206817	0.247625	0.159406	0.26588	0.160969	0.196785	0.194812	0.259995	0.158156	0.249153	0.187688	0.289289	0.149387	0.20634	0.217219	0.241019	0.202651	0.314585	0.211004	0.305307	0.202651	0.277085	0.187219	0.281312	0.144285	0.213875
0.223698	0.222964	0.236687	0.264436	0.25653	0.231207	0.241858	0.238941	0.223941	0.24317	0.237312	0.245124	0.235315	0.265201	0.23402	0.252457	0.218941	0.23402	0.241565	0.252214	0.23278	0.262214	0.224968	0.22403	0.223629	0.236936	0.216218	0.255191	0.23278	0.233596	0.241624	0.25909	0.259968	0.293464	0.229499	0.273569	0.223698	0.218152	0.21403	0.217615	0.221747	0.29118	0.240315	0.281903	0.221747	0.26368	0.21403	0.262908	0.238596	0.288186
0.134111	0.173447	0.18913	0.239397	0.15387	0.162487	0.148659	0.178034	0.143798	0.177458	0.134026	0.220068	0.153523	0.215114	0.1578	0.229362	0.134909	0.1578	0.152273	0.192939	0.147099	0.21273	0.131474	0.145849	0.177722	0.211897	0.130224	0.216784	0.147099	0.182151	0.171237	0.211318	0.149807	0.234814	0.16663	0.229038	0.134111	0.166376	0.165849	0.167273	0.150849	0.254814	0.173523	0.24163	0.150849	0.227314	0.150849	0.216784	0.118366	0.218425
0.166474	0.170249	0.186962	0.212628	0.188056	0.174191	0.178592	0.1838	0.166508	0.172134	0.175712	0.201024	0.176424	0.19604	0.176378	0.205441	0.163175	0.176378	0.180174	0.191239	0.173681	0.207489	0.165868	0.167431	0.175362	0.192628	0.159618	0.20005	0.173681	0.183663	0.183357	0.190808	0.190868	0.227489	0.175399	0.202116	0.166474	0.169052	0.167431	0.157041	0.154715	0.219773	0.182674	0.210496	0.154715	0.199773	0.162431	0.192334	0.174705	0.223045
0.145123	0.207989	0.230142	0.279993	0.183632	0.178291	0.175713	0.194463	0.177519	0.22722	0.184413	0.290455	0.191201	0.265501	0.164229	0.285166	0.141963	0.164229	0.179951	0.230201	0.157486	0.211243	0.141861	0.166236	0.214776	0.254993	0.150611	0.260713	0.157486	0.195872	0.218291	0.260455	0.170194	0.252076	0.197017	0.274216	0.145123	0.216763	0.226236	0.223701	0.191236	0.312076	0.229951	0.298892	0.191236	0.287076	0.191236	0.260713	0.136045	0.244854
0.196673	0.215736	0.229544	0.261742	0.228945	0.210371	0.216985	0.220683	0.20518	0.185717	0.216445	0.252357	0.217044	0.212279	0.208808	0.255527	0.192402	0.208808	0.218294	0.238392	0.206107	0.241881	0.196341	0.202357	0.215996	0.236742	0.192591	0.249433	0.206107	0.218051	0.228704	0.216492	0.228008	0.273548	0.214778	0.219884	0.196673	0.212454	0.212357	0.177847	0.171492	0.252684	0.230794	0.24243	0.171492	0.227684	0.202357	0.218569	0.204466	0.268548
0.157114	0.20981	0.232368	0.318321	0.181743	0.205404	0.175899	0.21392	0.185482	0.345067	0.186587	0.29643	0.185684	0.371785	0.187591	0.304466	0.165482	0.187591	0.174434	0.260786	0.171274	0.249848	0.159555	0.180024	0.230482	0.278321	0.168305	0.29517	0.171274	0.217403	0.214571	0.351091	0.164555	0.274848	0.206899	0.399528	0.157114	0.228598	0.240024	0.326178	0.282185	0.412009	0.231934	0.400778	0.282185	0.372009	0.205024	0.37233	0.142246	0.237071
0.162607	0.183528	0.198096	0.259456	0.191273	0.190672	0.179656	0.195906	0.174795	0.207048	0.184554	0.231533	0.178113	0.226579	0.183484	0.241922	0.165906	0.183484	0.176863	0.228623	0.174189	0.22779	0.166377	0.172939	0.193093	0.221956	0.165127	0.244656	0.174189	0.193616	0.194422	0.227783	0.18471	0.254873	0.185908	0.248003	0.162607	0.18956	0.192939	0.196863	0.177939	0.274873	0.203113	0.265596	0.177939	0.237373	0.177939	0.244656	0.166394	0.228484
0.17368	0.192995	0.201668	0.257612	0.211095	0.197786	0.19552	0.202395	0.184826	0.189309	0.198752	0.228231	0.190852	0.208215	0.192473	0.239036	0.17427	0.192473	0.192102	0.235946	0.185887	0.231362	0.178075	0.182137	0.193958	0.217612	0.174325	0.246145	0.185887	0.196148	0.205286	0.215299	0.206408	0.267196	0.192606	0.228181	0.17368	0.191258	0.192137	0.17792	0.166705	0.261764	0.212102	0.252486	0.166705	0.221764	0.182137	0.230713	0.184134	0.244973
0.21153	0.223835	0.232018	0.27949	0.248529	0.23015	0.232467	0.235384	0.218162	0.195847	0.23181	0.250456	0.225924	0.215378	0.227962	0.2614	0.210384	0.227962	0.229674	0.262545	0.223112	0.263379	0.215299	0.216862	0.222572	0.24199	0.209049	0.269134	0.223112	0.22865	0.237233	0.225841	0.246966	0.298795	0.224831	0.232358	0.21153	0.218483	0.216862	0.185477	0.180998	0.267931	0.240924	0.258654	0.180998	0.230431	0.211862	0.23827	0.224206	0.281296
0.109417	0.141858	0.159906	0.218766	0.140583	0.138732	0.130216	0.145216	0.130355	0.271667	0.145114	0.207093	0.134923	0.292448	0.127794	0.209982	0.111466	0.127794	0.128673	0.182933	0.119749	0.1696	0.111937	0.123499	0.153654	0.186266	0.115687	0.203966	0.119749	0.144177	0.154982	0.268004	0.13027	0.199183	0.141468	0.310122	0.109417	0.155121	0.163499	0.243334	0.21566	0.316344	0.167423	0.307066	0.21566	0.283844	0.138499	0.281127	0.113204	0.177794
0.176647	0.178057	0.189635	0.222524	0.194896	0.186725	0.185293	0.195085	0.171821	0.144714	0.176302	0.197448	0.179375	0.167371	0.190163	0.207975	0.17571	0.190163	0.185625	0.201413	0.185104	0.225996	0.177292	0.176354	0.180397	0.197524	0.168542	0.208835	0.185104	0.194809	0.185058	0.171584	0.198958	0.242663	0.181823	0.178308	0.176647	0.170475	0.166354	0.135177	0.13549	0.201798	0.183125	0.192521	0.13549	0.176798	0.166354	0.17797	0.182656	0.230996
0.159598	0.194965	0.199618	0.25169	0.184774	0.186378	0.175467	0.20005	0.163383	0.166634	0.153055	0.217431	0.173455	0.202415	0.184815	0.233253	0.16005	0.184815	0.177205	0.214677	0.174462	0.239052	0.158837	0.168212	0.187862	0.21669	0.152587	0.2313	0.174462	0.200069	0.188045	0.206998	0.183837	0.266552	0.183993	0.219741	0.159598	0.173739	0.168212	0.153856	0.14778	0.251119	0.187205	0.237936	0.14778	0.216119	0.163212	0.215868	0.148299	0.247107
0.201752	0.212285	0.227123	0.260571	0.232774	0.214825	0.220189	0.224512	0.205884	0.202107	0.214649	0.24306	0.217123	0.228045	0.215137	0.249981	0.198106	0.215137	0.220873	0.23972	0.21181	0.24946	0.202045	0.20556	0.2142	0.233071	0.195795	0.248262	0.21181	0.221255	0.226908	0.228878	0.233711	0.279877	0.215482	0.237524	0.201752	0.208158	0.20556	0.187107	0.185128	0.264445	0.227123	0.254191	0.185128	0.236944	0.20056	0.23283	0.209545	0.272377
0.127301	0.207768	0.212321	0.289115	0.166644	0.173942	0.157197	0.186364	0.161225	0.246991	0.163675	0.276383	0.168935	0.281522	0.156129	0.280817	0.130114	0.156129	0.157685	0.234879	0.143415	0.215088	0.12779	0.152165	0.202926	0.249115	0.13654	0.267614	0.143415	0.186244	0.199775	0.277031	0.149456	0.256754	0.182946	0.30371	0.127301	0.202692	0.212165	0.23875	0.200313	0.339902	0.215185	0.326719	0.200313	0.299902	0.177165	0.290762	0.113779	0.230088
0.195434	0.201489	0.208422	0.245894	0.227433	0.207804	0.212622	0.214288	0.195816	0.187313	0.206964	0.21811	0.204829	0.208095	0.209367	0.229054	0.193038	0.209367	0.211079	0.23145	0.205766	0.242283	0.197954	0.197016	0.197726	0.213394	0.189204	0.235538	0.205766	0.208804	0.212387	0.211428	0.22962	0.2727	0.202485	0.221324	0.195434	0.191137	0.187016	0.169813	0.171584	0.247268	0.212329	0.23799	0.171584	0.214768	0.187016	0.220106	0.20811	0.2602
0.134324	0.18212	0.179578	0.245253	0.178119	0.167475	0.162136	0.17474	0.152831	0.174437	0.161713	0.21489	0.160671	0.199906	0.158412	0.226537	0.135053	0.158412	0.159421	0.215496	0.149734	0.205391	0.138015	0.148484	0.170053	0.200253	0.136765	0.23099	0.149734	0.168085	0.180808	0.207174	0.169682	0.249558	0.165359	0.22251	0.134324	0.167058	0.168484	0.162122	0.145768	0.261842	0.189421	0.250612	0.145768	0.216842	0.153484	0.223274	0.137234	0.224558
0.193574	0.20865	0.214063	0.261534	0.230573	0.212194	0.214512	0.217429	0.200206	0.15783	0.213854	0.2325	0.207969	0.177361	0.210007	0.243444	0.192429	0.210007	0.211719	0.24459	0.205156	0.245423	0.197344	0.198906	0.204616	0.224034	0.191094	0.251179	0.205156	0.210695	0.219277	0.192454	0.229011	0.28084	0.206875	0.19434	0.193574	0.200527	0.198906	0.152089	0.14761	0.234544	0.222969	0.225266	0.14761	0.197044	0.193906	0.204882	0.20625	0.26334
0.115207	0.162563	0.180696	0.231917	0.163456	0.143202	0.14927	0.150311	0.149964	0.296207	0.178612	0.242258	0.159602	0.317613	0.12789	0.234452	0.112186	0.12789	0.148352	0.199973	0.124914	0.159556	0.117102	0.133664	0.169374	0.201917	0.125852	0.221561	0.124914	0.145452	0.184035	0.291919	0.148768	0.206223	0.156633	0.328967	0.115207	0.180285	0.193664	0.268429	0.235825	0.343383	0.200852	0.334106	0.235825	0.313383	0.158664	0.298722	0.127883	0.196223
0.128058	0.144384	0.156047	0.181296	0.16339	0.136817	0.149968	0.145801	0.137051	0.144968	0.155422	0.178234	0.149675	0.16825	0.13588	0.178067	0.122051	0.13588	0.150925	0.164074	0.13589	0.161574	0.128078	0.13214	0.141739	0.158796	0.124328	0.172051	0.13589	0.141706	0.159734	0.164268	0.163078	0.195324	0.142609	0.172868	0.128058	0.141262	0.14214	0.129042	0.124424	0.197608	0.162175	0.188331	0.124424	0.175108	0.13214	0.164335	0.142956	0.195046
0.127361	0.162963	0.172615	0.232179	0.152824	0.157457	0.143785	0.167223	0.138924	0.162475	0.138917	0.205428	0.14482	0.190443	0.150894	0.216519	0.130035	0.150894	0.14357	0.193533	0.140272	0.201763	0.128553	0.139022	0.165035	0.197179	0.127303	0.213473	0.140272	0.167511	0.162457	0.192712	0.146886	0.227596	0.155897	0.209992	0.127361	0.157596	0.159022	0.154604	0.136306	0.23988	0.16857	0.228649	0.136306	0.20488	0.144022	0.205757	0.121383	0.203707
0.135975	0.149665	0.163963	0.188379	0.158807	0.144317	0.149968	0.154551	0.140384	0.130323	0.152088	0.1849	0.150925	0.154854	0.144629	0.185567	0.132051	0.144629	0.152175	0.16449	0.142557	0.17449	0.134744	0.138807	0.151738	0.170879	0.130994	0.175801	0.142557	0.155039	0.159733	0.153002	0.159744	0.19574	0.149275	0.159055	0.135975	0.147928	0.148807	0.12236	0.115658	0.182592	0.160925	0.173315	0.115658	0.165092	0.138807	0.152653	0.144206	0.193796
0.133419	0.170489	0.186172	0.251986	0.162631	0.167889	0.152967	0.17703	0.150606	0.189812	0.1531	0.22711	0.155877	0.217156	0.158202	0.236952	0.136717	0.158202	0.152127	0.21084	0.146954	0.21032	0.135235	0.148204	0.179217	0.214486	0.136485	0.23328	0.146954	0.176693	0.176639	0.21836	0.153568	0.239903	0.167579	0.23858	0.133419	0.174278	0.178204	0.182127	0.158204	0.269903	0.185877	0.258672	0.158204	0.232403	0.158204	0.23328	0.12744	0.213514
0.169625	0.17041	0.182613	0.205085	0.196624	0.174495	0.184313	0.183479	0.167507	0.166535	0.178655	0.189801	0.17902	0.189816	0.178557	0.195745	0.164729	0.178557	0.18527	0.190641	0.177457	0.206474	0.169645	0.168707	0.169417	0.182585	0.160895	0.194729	0.177457	0.180495	0.184078	0.185835	0.201311	0.231891	0.174176	0.195545	0.169625	0.162828	0.158707	0.14672	0.150991	0.214175	0.18152	0.204897	0.150991	0.191675	0.158707	0.187013	0.182301	0.229391
0.126083	0.172781	0.196454	0.261985	0.153355	0.162697	0.146812	0.17176	0.154173	0.217781	0.164605	0.258016	0.15812	0.243093	0.147385	0.257854	0.129729	0.147385	0.14687	0.212801	0.136766	0.196291	0.127001	0.145516	0.190822	0.231985	0.135751	0.24301	0.136766	0.174544	0.183531	0.238232	0.138667	0.222958	0.170438	0.261114	0.126083	0.193114	0.205516	0.217503	0.178232	0.290674	0.19937	0.28042	0.178232	0.260674	0.170516	0.250726	0.120542	0.199624
0.161632	0.198042	0.22712	0.277509	0.197381	0.18921	0.187778	0.19757	0.191806	0.219761	0.213787	0.287433	0.19936	0.242417	0.175148	0.28046	0.160695	0.175148	0.18811	0.238898	0.170089	0.210981	0.162277	0.178839	0.217882	0.252509	0.171027	0.26382	0.170089	0.197294	0.222544	0.242001	0.183943	0.245148	0.201808	0.253355	0.161632	0.22546	0.238839	0.223095	0.188407	0.289716	0.23811	0.280438	0.188407	0.264716	0.203839	0.248387	0.167641	0.233481
0.14813	0.209847	0.203149	0.268555	0.193305	0.184076	0.178164	0.195248	0.167748	0.220288	0.169087	0.238462	0.178653	0.25357	0.175013	0.250951	0.147748	0.175013	0.177403	0.233208	0.165493	0.227583	0.149868	0.164243	0.19056	0.223555	0.148618	0.251498	0.165493	0.189434	0.200742	0.253894	0.184868	0.275083	0.185024	0.275063	0.14813	0.18477	0.184243	0.199918	0.184675	0.310515	0.207403	0.297331	0.184675	0.265515	0.169243	0.26693	0.143496	0.252305
0.204758	0.226559	0.242512	0.277214	0.240637	0.221173	0.227917	0.232813	0.215001	0.226121	0.223605	0.265949	0.228328	0.255965	0.218985	0.270235	0.200001	0.218985	0.229578	0.25218	0.215793	0.254992	0.204074	0.212043	0.227501	0.249714	0.200324	0.264063	0.215793	0.229421	0.241589	0.254483	0.239074	0.291242	0.226418	0.264333	0.204758	0.223117	0.222043	0.210195	0.204327	0.293526	0.243328	0.282296	0.204327	0.266026	0.212043	0.256347	0.20989	0.285964
0.130083	0.154772	0.170455	0.211125	0.162772	0.149267	0.151299	0.158955	0.143104	0.16047	0.154647	0.201392	0.153232	0.186408	0.14458	0.204424	0.127549	0.14458	0.151982	0.183052	0.140142	0.181125	0.130376	0.138892	0.158642	0.183625	0.129126	0.197705	0.140142	0.156809	0.168017	0.184926	0.15871	0.213208	0.153814	0.196998	0.130083	0.15649	0.158892	0.149266	0.136176	0.225492	0.173232	0.215239	0.136176	0.197992	0.143892	0.189989	0.135654	0.203486
0.157056	0.166236	0.177544	0.208488	0.184471	0.167411	0.172646	0.175771	0.159451	0.155185	0.170877	0.192856	0.169228	0.177841	0.168349	0.198661	0.153896	0.168349	0.172978	0.189321	0.165513	0.199738	0.1577	0.159263	0.166083	0.183488	0.15145	0.197021	0.165513	0.173273	0.177411	0.177424	0.186033	0.225571	0.167231	0.186556	0.157056	0.160884	0.159263	0.141296	0.13883	0.210139	0.177978	0.200862	0.13883	0.185139	0.154263	0.181589	0.167509	0.218349
0.112276	0.161393	0.174796	0.229091	0.139119	0.143917	0.132172	0.158839	0.1287	0.267182	0.12365	0.213858	0.13891	0.304213	0.136104	0.220792	0.112589	0.136104	0.13516	0.182354	0.12589	0.190063	0.110265	0.12714	0.162901	0.199091	0.111515	0.207589	0.12589	0.161219	0.15975	0.278519	0.131931	0.219229	0.150421	0.318901	0.112276	0.155167	0.15714	0.235238	0.2143	0.32639	0.16516	0.313206	0.2143	0.29639	0.13714	0.284749	0.0987542	0.202563
0.179062	0.186097	0.19955	0.232022	0.21106	0.190181	0.197499	0.197916	0.183194	0.178441	0.196842	0.215487	0.193456	0.200472	0.190494	0.221431	0.175416	0.190494	0.197206	0.215077	0.188144	0.220911	0.180331	0.181894	0.187603	0.204522	0.174081	0.221666	0.188144	0.193682	0.202265	0.201305	0.211998	0.251327	0.189862	0.209951	0.179062	0.183515	0.181894	0.163441	0.161461	0.235895	0.203456	0.226618	0.161461	0.208395	0.176894	0.206234	0.191737	0.243827
0.168264	0.245098	0.248401	0.333941	0.20775	0.217813	0.197188	0.227031	0.202327	0.20923	0.207437	0.313713	0.206699	0.238605	0.19875	0.320781	0.173438	0.19875	0.195449	0.281389	0.184651	0.258524	0.170979	0.193401	0.242344	0.288941	0.179729	0.313281	0.184651	0.225797	0.237813	0.255133	0.189312	0.299358	0.222229	0.265654	0.168264	0.242952	0.253401	0.220619	0.179821	0.320778	0.255449	0.308571	0.179821	0.275778	0.218401	0.274701	0.157403	0.265469
0.210763	0.216684	0.231252	0.250946	0.234429	0.215494	0.224479	0.225729	0.211284	0.17505	0.22271	0.244689	0.222936	0.199581	0.218307	0.246744	0.205729	0.218307	0.226686	0.231779	0.217345	0.245946	0.209533	0.211095	0.217916	0.233446	0.203283	0.239479	0.217345	0.225106	0.229244	0.202359	0.237866	0.268029	0.219064	0.202671	0.210763	0.212717	0.211095	0.168105	0.167515	0.229449	0.227936	0.220171	0.167515	0.211949	0.206095	0.200898	0.221217	0.268307
0.161406	0.221637	0.238925	0.324331	0.181581	0.211102	0.17769	0.223524	0.184774	0.230972	0.173613	0.295488	0.186929	0.265503	0.195789	0.307977	0.169774	0.195789	0.178179	0.261484	0.177519	0.265859	0.161894	0.183769	0.235086	0.284331	0.168144	0.297274	0.177519	0.22896	0.215268	0.270272	0.166894	0.288359	0.21205	0.293246	0.161406	0.226796	0.233769	0.235046	0.196053	0.330643	0.228179	0.317459	0.196053	0.290643	0.203769	0.289558	0.136772	0.250581
0.226431	0.219851	0.224419	0.247169	0.254263	0.22894	0.239591	0.236674	0.216674	0.205841	0.225044	0.217857	0.228048	0.227872	0.236752	0.23019	0.221674	0.236752	0.239298	0.239947	0.235513	0.264947	0.227701	0.221763	0.211362	0.219669	0.213951	0.237924	0.235513	0.231329	0.229357	0.226391	0.262701	0.291197	0.222232	0.23624	0.226431	0.200884	0.191763	0.179915	0.194047	0.253481	0.223048	0.244203	0.194047	0.225981	0.201763	0.230208	0.241329	0.285919
0.145899	0.179355	0.191152	0.252244	0.175944	0.176758	0.165169	0.185899	0.159197	0.292601	0.161413	0.22459	0.16558	0.319945	0.16957	0.23582	0.148086	0.16957	0.16433	0.21582	0.159434	0.219466	0.147715	0.158184	0.183086	0.214744	0.146465	0.234649	0.159434	0.184451	0.183841	0.298	0.169382	0.249883	0.175059	0.340257	0.145899	0.176758	0.178184	0.258157	0.240344	0.347043	0.19058	0.335813	0.240344	0.309543	0.163184	0.311809	0.142142	0.225716
0.191166	0.195212	0.204155	0.237877	0.221915	0.201661	0.207729	0.208771	0.190923	0.201857	0.202071	0.213217	0.200561	0.223264	0.203849	0.222911	0.188146	0.203849	0.206811	0.223432	0.200873	0.235515	0.193061	0.192123	0.192833	0.207877	0.184311	0.227521	0.200873	0.203912	0.207495	0.220717	0.224728	0.264682	0.197592	0.234618	0.191166	0.186245	0.182123	0.179728	0.182123	0.254682	0.206811	0.245405	0.182123	0.224682	0.182123	0.227521	0.203842	0.254682
0.109972	0.156859	0.164992	0.216787	0.134315	0.139113	0.127368	0.154035	0.121396	0.184662	0.113846	0.196554	0.131606	0.221693	0.1338	0.205988	0.110285	0.1338	0.130356	0.17255	0.123586	0.187759	0.107961	0.122336	0.153097	0.186787	0.106711	0.195285	0.123586	0.156415	0.149946	0.212202	0.129627	0.214425	0.143117	0.236381	0.109972	0.142863	0.142336	0.166421	0.150484	0.257574	0.152856	0.24439	0.150484	0.227574	0.127336	0.218433	0.0964502	0.197759
0.156481	0.178822	0.186734	0.223382	0.183193	0.172618	0.172696	0.184258	0.159501	0.167844	0.161162	0.202672	0.170606	0.197687	0.17293	0.21168	0.153946	0.17293	0.174356	0.196402	0.167516	0.213382	0.155797	0.161266	0.173946	0.195882	0.149547	0.208008	0.167516	0.183089	0.181368	0.196206	0.18413	0.240465	0.173141	0.208278	0.156481	0.16484	0.161266	0.15164	0.14855	0.232749	0.180606	0.221518	0.14855	0.205249	0.156266	0.200292	0.157168	0.230743
0.182658	0.23137	0.245178	0.321972	0.217001	0.225549	0.206304	0.236721	0.202832	0.254786	0.197782	0.28799	0.209292	0.288067	0.213986	0.302424	0.186721	0.213986	0.205542	0.275236	0.200021	0.275445	0.184396	0.201271	0.237033	0.276972	0.185646	0.300471	0.200021	0.235351	0.233882	0.290706	0.206063	0.312111	0.224553	0.314005	0.182658	0.229299	0.231271	0.243675	0.218988	0.349827	0.243042	0.336644	0.218988	0.304827	0.211271	0.308187	0.169136	0.280445
0.204212	0.209102	0.2247	0.260922	0.237461	0.217207	0.223274	0.224316	0.208969	0.224903	0.222617	0.241263	0.218606	0.246309	0.216894	0.248457	0.201191	0.216894	0.222356	0.243978	0.213919	0.248561	0.206106	0.207669	0.213379	0.230922	0.199856	0.250566	0.213919	0.219457	0.22804	0.243763	0.237773	0.280228	0.215638	0.257663	0.204212	0.20929	0.207669	0.205273	0.202669	0.280228	0.229856	0.27095	0.202669	0.250228	0.202669	0.250566	0.216888	0.270228
0.0994041	0.122115	0.134892	0.171531	0.123903	0.115107	0.114925	0.124092	0.108953	0.236654	0.120934	0.16458	0.117132	0.259935	0.11167	0.166357	0.0978416	0.11167	0.115882	0.14292	0.107236	0.146253	0.0994236	0.105986	0.125029	0.149031	0.0981736	0.157842	0.107236	0.124441	0.129691	0.23049	0.12109	0.16917	0.118955	0.268997	0.0994041	0.122607	0.125986	0.202209	0.188147	0.26633	0.134632	0.257053	0.188147	0.24383	0.110986	0.235002	0.105413	0.160003
0.157357	0.169644	0.187962	0.216957	0.192832	0.167773	0.179544	0.174804	0.170239	0.18329	0.193769	0.21765	0.180775	0.202665	0.164336	0.215117	0.152461	0.164336	0.179525	0.198919	0.164212	0.188346	0.158353	0.162962	0.175742	0.194457	0.157103	0.208555	0.164212	0.170844	0.192357	0.198684	0.190019	0.221263	0.173978	0.208394	0.157357	0.178607	0.182962	0.170975	0.160246	0.233547	0.198275	0.225246	0.160246	0.211047	0.167962	0.200838	0.174915	0.218763
0.116838	0.161814	0.177092	0.235683	0.149383	0.148947	0.139858	0.159338	0.138886	0.28104	0.146102	0.224279	0.146519	0.309634	0.13801	0.22801	0.117775	0.13801	0.140269	0.19426	0.129123	0.185405	0.117404	0.132873	0.167775	0.203183	0.121154	0.218088	0.129123	0.15914	0.16853	0.28519	0.139071	0.218322	0.154748	0.326196	0.116838	0.166447	0.172873	0.251596	0.225033	0.335483	0.179019	0.324252	0.225033	0.302983	0.147873	0.295248	0.113081	0.199155
0.179991	0.181163	0.188096	0.229036	0.206299	0.19263	0.192734	0.197161	0.17815	0.291264	0.189737	0.197784	0.183964	0.308139	0.194192	0.209973	0.179817	0.194192	0.190214	0.214053	0.189346	0.227647	0.183487	0.180596	0.180598	0.196536	0.174737	0.218411	0.189346	0.192923	0.190546	0.283694	0.208487	0.251397	0.184112	0.32359	0.179991	0.173741	0.170596	0.248208	0.247757	0.318557	0.191464	0.310257	0.247757	0.286057	0.170596	0.295571	0.193105	0.234453
0.184755	0.224987	0.232275	0.289903	0.221598	0.215563	0.208818	0.227985	0.197012	0.31463	0.193629	0.258837	0.208056	0.349162	0.21025	0.272438	0.184235	0.21025	0.209306	0.254834	0.200869	0.262542	0.185244	0.197119	0.219547	0.249903	0.181494	0.271735	0.200869	0.224532	0.226396	0.330782	0.21691	0.301709	0.2154	0.368016	0.184755	0.210146	0.207119	0.276667	0.266563	0.381153	0.229306	0.367969	0.266563	0.341153	0.197119	0.341179	0.1779	0.281709
0.182228	0.203049	0.212482	0.254407	0.214774	0.201004	0.201916	0.211395	0.18761	0.206122	0.191493	0.22967	0.198576	0.234716	0.200067	0.240067	0.179833	0.200067	0.202326	0.22965	0.194514	0.240796	0.182795	0.188264	0.199833	0.221907	0.176545	0.240145	0.194514	0.207864	0.210588	0.23342	0.214461	0.273713	0.200139	0.247945	0.182228	0.191838	0.188264	0.186493	0.183264	0.273713	0.211076	0.262482	0.183264	0.241213	0.183264	0.240145	0.185139	0.261213
0.136373	0.165571	0.176744	0.240609	0.168645	0.167154	0.156269	0.173717	0.150296	0.283349	0.157395	0.210806	0.155077	0.306161	0.159342	0.22231	0.139185	0.159342	0.153827	0.208092	0.149556	0.206581	0.139791	0.148306	0.170279	0.200609	0.138541	0.224967	0.149556	0.170668	0.172987	0.285467	0.161457	0.238248	0.163228	0.328349	0.136373	0.165904	0.168306	0.248904	0.230467	0.335408	0.181327	0.325154	0.230467	0.295408	0.153306	0.302127	0.137499	0.211581
0.143624	0.153784	0.171612	0.202001	0.164373	0.154952	0.15602	0.164562	0.147548	0.169315	0.157029	0.193175	0.156352	0.193221	0.15464	0.196202	0.141437	0.15464	0.157602	0.17589	0.150831	0.187973	0.143019	0.147081	0.161124	0.182001	0.139269	0.188312	0.150831	0.165536	0.165786	0.185675	0.164685	0.20714	0.15755	0.200409	0.143624	0.156202	0.157081	0.155519	0.147081	0.21714	0.167602	0.207862	0.147081	0.19714	0.147081	0.188312	0.149633	0.200473
0.125185	0.144501	0.153174	0.23134	0.129267	0.160402	0.124803	0.165012	0.12522	0.261185	0.116924	0.179736	0.120135	0.280091	0.15509	0.201652	0.136887	0.15509	0.121385	0.187451	0.137392	0.216201	0.12958	0.133642	0.156574	0.19134	0.12583	0.208762	0.137392	0.169875	0.134569	0.259397	0.12458	0.218701	0.144111	0.311167	0.125185	0.142763	0.143642	0.233129	0.210803	0.305861	0.141385	0.296584	0.210803	0.265861	0.133642	0.285922	0.113417	0.174257
0.205855	0.213785	0.218843	0.265343	0.244937	0.222739	0.22714	0.227348	0.209223	0.221546	0.222593	0.230406	0.217472	0.240452	0.222426	0.243989	0.204223	0.222426	0.223722	0.253121	0.218062	0.256871	0.21025	0.209312	0.208911	0.225343	0.2015	0.256098	0.218062	0.218878	0.226905	0.242906	0.24525	0.294371	0.214781	0.258195	0.205855	0.203433	0.199312	0.198305	0.199312	0.284371	0.228722	0.275093	0.199312	0.244371	0.199312	0.256098	0.220753	0.276593
0.117114	0.192801	0.202134	0.275178	0.155206	0.16188	0.146385	0.174926	0.150413	0.19543	0.152863	0.265571	0.158748	0.230586	0.144692	0.268755	0.119301	0.144692	0.147498	0.220942	0.132602	0.2024	0.116977	0.141352	0.192114	0.237678	0.125727	0.253677	0.132602	0.175432	0.188963	0.234105	0.138644	0.242817	0.172134	0.250899	0.117114	0.19188	0.201352	0.196449	0.158636	0.295101	0.203748	0.281917	0.158636	0.257601	0.166352	0.24596	0.103592	0.21865
0.189169	0.193974	0.202157	0.227685	0.225334	0.195566	0.209551	0.203301	0.190523	0.188579	0.206116	0.210595	0.203008	0.21061	0.198379	0.216816	0.183301	0.198379	0.209258	0.217685	0.198251	0.224351	0.190438	0.189501	0.187988	0.200185	0.181688	0.219551	0.198251	0.196845	0.209316	0.209129	0.228772	0.258935	0.19497	0.217867	0.189169	0.183622	0.179501	0.166542	0.171785	0.241218	0.208008	0.231941	0.171785	0.213718	0.179501	0.211835	0.206289	0.255879
0.19856	0.232272	0.23858	0.305652	0.228736	0.23284	0.216928	0.244011	0.204845	0.230657	0.194517	0.258892	0.212416	0.263938	0.228777	0.279715	0.201511	0.228777	0.216166	0.268638	0.215923	0.288013	0.200298	0.209673	0.229324	0.260652	0.194048	0.285261	0.215923	0.241531	0.229506	0.268892	0.225298	0.320513	0.225455	0.288765	0.19856	0.215201	0.209673	0.21325	0.204673	0.320513	0.231166	0.30733	0.204673	0.275513	0.204673	0.285261	0.18726	0.291069
0.250166	0.255443	0.265771	0.316016	0.289391	0.268707	0.271728	0.271363	0.257422	0.244787	0.275953	0.284833	0.263583	0.259787	0.265895	0.296051	0.249645	0.265895	0.267333	0.302978	0.261396	0.298655	0.255537	0.255146	0.257926	0.276016	0.249287	0.307613	0.261396	0.263028	0.274541	0.269185	0.287203	0.335322	0.261162	0.278641	0.250166	0.255791	0.255146	0.232102	0.226998	0.312174	0.279833	0.303873	0.226998	0.272174	0.250146	0.284465	0.267724	0.315322
0.126345	0.190848	0.206481	0.282299	0.166664	0.171032	0.15624	0.181501	0.160268	0.235027	0.167601	0.270544	0.167002	0.265652	0.15322	0.274001	0.129157	0.15322	0.155752	0.23197	0.141481	0.208272	0.127809	0.150231	0.198063	0.242299	0.136559	0.262751	0.141481	0.180405	0.196865	0.263476	0.149476	0.249938	0.179059	0.287839	0.126345	0.199782	0.210231	0.229101	0.190663	0.32537	0.213252	0.313163	0.190663	0.28537	0.175231	0.278183	0.117705	0.223272
0.174169	0.208974	0.232157	0.272685	0.225334	0.195566	0.209551	0.203301	0.205523	0.233579	0.236116	0.285595	0.218008	0.25561	0.183379	0.276816	0.168301	0.183379	0.209258	0.247685	0.183251	0.209351	0.175438	0.189501	0.217988	0.245185	0.181688	0.264551	0.183251	0.196845	0.239316	0.254129	0.213772	0.258935	0.20997	0.262867	0.174169	0.228622	0.239501	0.226542	0.201785	0.301218	0.253008	0.291941	0.201785	0.273718	0.209501	0.256835	0.191289	0.255879
0.137625	0.175982	0.185145	0.235967	0.164051	0.16503	0.155368	0.179327	0.145785	0.273781	0.137957	0.209832	0.156482	0.310187	0.161592	0.221905	0.137452	0.161592	0.157732	0.196454	0.151864	0.214579	0.136239	0.148114	0.172764	0.203467	0.132489	0.215577	0.151864	0.179971	0.172947	0.285743	0.161239	0.243329	0.166395	0.325639	0.137625	0.161141	0.158114	0.235726	0.225274	0.330489	0.173982	0.317305	0.225274	0.297989	0.148114	0.292737	0.126326	0.226384
0.13984	0.148395	0.160328	0.1853	0.169339	0.14721	0.157027	0.156194	0.142722	0.156781	0.15637	0.175016	0.154234	0.180062	0.148772	0.17846	0.134944	0.148772	0.157984	0.168356	0.147672	0.176689	0.139859	0.141422	0.147132	0.1628	0.133609	0.174944	0.147672	0.15321	0.161793	0.173766	0.171526	0.204605	0.149391	0.185791	0.13984	0.143043	0.141422	0.137151	0.136422	0.204605	0.161734	0.195328	0.136422	0.182105	0.136422	0.174944	0.152516	0.202105
0.131142	0.156693	0.176396	0.214988	0.153688	0.150751	0.146663	0.163642	0.140691	0.210159	0.142906	0.206083	0.150823	0.241253	0.147314	0.209814	0.129579	0.147314	0.149573	0.178564	0.140927	0.18971	0.129208	0.139677	0.164579	0.192487	0.127958	0.197392	0.140927	0.165945	0.165335	0.225698	0.150875	0.212626	0.156552	0.250316	0.131142	0.158251	0.159677	0.189604	0.175541	0.263491	0.168323	0.25226	0.175541	0.240991	0.144677	0.228256	0.127385	0.20346
0.197383	0.202763	0.225371	0.245343	0.226882	0.203503	0.215821	0.213737	0.204015	0.221824	0.220163	0.246309	0.216778	0.246355	0.203815	0.244753	0.191237	0.203815	0.218028	0.225899	0.203965	0.229232	0.196153	0.200215	0.210925	0.227843	0.192403	0.234987	0.203965	0.212003	0.225586	0.237559	0.227819	0.257149	0.210684	0.248334	0.197383	0.209336	0.210215	0.204694	0.200215	0.267149	0.226778	0.257871	0.200215	0.249649	0.200215	0.234987	0.210059	0.259649
0.117276	0.155593	0.177881	0.230349	0.163168	0.144428	0.149116	0.149585	0.150921	0.297299	0.18223	0.239444	0.158471	0.314799	0.129116	0.231772	0.115366	0.129116	0.147221	0.200088	0.126006	0.159099	0.120147	0.134756	0.168647	0.200349	0.128897	0.220835	0.126006	0.14486	0.181928	0.289104	0.14848	0.202432	0.155772	0.327264	0.117276	0.180401	0.194756	0.270632	0.236917	0.339592	0.199721	0.331292	0.236917	0.309592	0.159756	0.297995	0.132612	0.19021
0.153819	0.161731	0.176924	0.207169	0.188044	0.16361	0.174131	0.170016	0.162325	0.171002	0.183356	0.199736	0.172237	0.189752	0.162048	0.200954	0.149548	0.162048	0.173487	0.191631	0.161299	0.187308	0.15544	0.157549	0.165329	0.182169	0.15169	0.198766	0.161299	0.165431	0.181944	0.18702	0.187106	0.218975	0.166065	0.197356	0.153819	0.165694	0.167549	0.156187	0.149833	0.221259	0.185986	0.212958	0.149833	0.196259	0.157549	0.19105	0.171377	0.213975
0.205273	0.250316	0.275644	0.342842	0.257545	0.242721	0.241835	0.249283	0.24253	0.312002	0.266295	0.339707	0.250644	0.334815	0.224908	0.337877	0.204752	0.224908	0.239394	0.306992	0.218457	0.265481	0.208691	0.227207	0.265846	0.302842	0.217441	0.330533	0.218457	0.242901	0.278554	0.332639	0.240358	0.317148	0.252128	0.353669	0.205273	0.274804	0.287207	0.302743	0.267639	0.39258	0.296894	0.382326	0.267639	0.35258	0.252207	0.345965	0.213066	0.297148
0.198596	0.201999	0.214202	0.253197	0.234072	0.211513	0.218284	0.216044	0.203978	0.20953	0.222509	0.231389	0.212014	0.226405	0.210576	0.238857	0.196201	0.210576	0.215764	0.240159	0.207952	0.239586	0.202092	0.201702	0.204482	0.220697	0.195842	0.244794	0.207952	0.209584	0.221096	0.227423	0.233759	0.272503	0.207717	0.239634	0.198596	0.202346	0.201702	0.192215	0.188986	0.264787	0.224514	0.256486	0.188986	0.232287	0.196702	0.237078	0.216155	0.260003
0.14374	0.189494	0.193877	0.278306	0.159893	0.187733	0.153775	0.196952	0.153358	0.154737	0.13958	0.229189	0.153287	0.184112	0.178671	0.250702	0.153358	0.178671	0.152037	0.226865	0.160127	0.247334	0.146455	0.158877	0.192265	0.233306	0.145205	0.253202	0.160127	0.200162	0.1744	0.198325	0.151455	0.264834	0.177705	0.215605	0.14374	0.178428	0.178877	0.158256	0.133013	0.25397	0.182037	0.241763	0.133013	0.20897	0.163877	0.222338	0.12399	0.222056
0.330283	0.33556	0.345888	0.391689	0.376175	0.346602	0.35629	0.349259	0.339762	0.304843	0.362737	0.364951	0.348145	0.319843	0.34379	0.373946	0.32754	0.34379	0.351895	0.383095	0.341513	0.372106	0.335654	0.335263	0.335821	0.351689	0.329404	0.385509	0.341513	0.338701	0.359102	0.333871	0.373987	0.415439	0.341279	0.336475	0.330283	0.335908	0.335263	0.294565	0.291683	0.376859	0.364395	0.368558	0.291683	0.336859	0.330263	0.346928	0.352286	0.399884
0.168415	0.187851	0.198669	0.249483	0.187627	0.191635	0.179214	0.202026	0.169352	0.182278	0.164346	0.215856	0.175874	0.210872	0.190698	0.230698	0.170464	0.190698	0.179624	0.215837	0.1807	0.240316	0.168981	0.17445	0.190464	0.216983	0.162731	0.230776	0.1807	0.20294	0.187885	0.21189	0.187315	0.259899	0.186325	0.228545	0.168415	0.178024	0.17445	0.169408	0.161734	0.252183	0.188374	0.240953	0.161734	0.219683	0.16945	0.22306	0.162436	0.23851
0.213111	0.212647	0.2261	0.238849	0.240943	0.21312	0.228771	0.223354	0.210854	0.19749	0.224225	0.232037	0.224728	0.222022	0.218433	0.23437	0.205854	0.218433	0.230978	0.226627	0.219693	0.241627	0.211881	0.210943	0.210542	0.221349	0.203131	0.229604	0.219693	0.220509	0.228537	0.217855	0.246881	0.267877	0.216412	0.22289	0.213111	0.205065	0.200943	0.178879	0.185511	0.242445	0.224728	0.233168	0.185511	0.224945	0.200943	0.214172	0.228009	0.272599
0.0984836	0.113928	0.124206	0.176114	0.126602	0.118892	0.114282	0.12147	0.109421	0.12844	0.128946	0.156394	0.112036	0.141409	0.112954	0.162329	0.100532	0.112954	0.110786	0.153093	0.106863	0.146947	0.102956	0.105613	0.119907	0.143614	0.101706	0.16522	0.106863	0.118477	0.125142	0.142428	0.12129	0.17153	0.114675	0.159083	0.0984836	0.12028	0.125613	0.12057	0.102896	0.183814	0.134536	0.17649	0.102896	0.151314	0.110613	0.157504	0.112036	0.150142
0.153129	0.157036	0.173969	0.203233	0.187224	0.160751	0.173094	0.163876	0.1649	0.147017	0.195974	0.203656	0.172372	0.158579	0.157313	0.200282	0.149344	0.157313	0.171122	0.190785	0.158031	0.175733	0.156078	0.156781	0.164813	0.180733	0.154828	0.197626	0.158031	0.159073	0.182001	0.161542	0.184412	0.205317	0.163891	0.16542	0.153129	0.170473	0.176781	0.142758	0.130917	0.194452	0.189872	0.188105	0.130917	0.171952	0.161781	0.166761	0.178231	0.200594
0.174373	0.21523	0.221893	0.283271	0.212466	0.207056	0.199061	0.218852	0.187255	0.225251	0.183872	0.24908	0.197674	0.259157	0.201118	0.263931	0.174477	0.201118	0.198924	0.248201	0.191112	0.25466	0.175487	0.187362	0.20979	0.240771	0.171736	0.265102	0.191112	0.214775	0.216639	0.260546	0.207153	0.295076	0.205643	0.279887	0.174373	0.200389	0.197361	0.205807	0.195078	0.312792	0.220174	0.299609	0.195078	0.270292	0.187362	0.272818	0.167518	0.272576
0.20203	0.208323	0.219901	0.247099	0.229302	0.210728	0.217343	0.22104	0.200537	0.211197	0.206802	0.227714	0.212401	0.23776	0.214165	0.235884	0.197759	0.214165	0.218651	0.228749	0.211464	0.247238	0.201698	0.202714	0.206353	0.222099	0.192948	0.23479	0.211464	0.218408	0.219061	0.232714	0.233365	0.273905	0.210136	0.245364	0.20203	0.197811	0.192714	0.189068	0.192714	0.263905	0.216151	0.253651	0.192714	0.238905	0.192714	0.23479	0.209823	0.268905
0.112337	0.148936	0.162474	0.216903	0.11849	0.141331	0.117372	0.155549	0.116956	0.153458	0.103177	0.192787	0.121884	0.187833	0.137268	0.204299	0.116956	0.137268	0.120634	0.165462	0.123724	0.195931	0.110052	0.122474	0.155862	0.191903	0.108802	0.191799	0.123724	0.163759	0.137997	0.182787	0.115052	0.203431	0.141302	0.204326	0.112337	0.142025	0.142474	0.147717	0.127474	0.223431	0.140634	0.211224	0.127474	0.198431	0.127474	0.191799	0.092587	0.180653
0.241908	0.263084	0.279662	0.30617	0.283204	0.254226	0.268887	0.266492	0.253749	0.221898	0.266798	0.302475	0.269923	0.252367	0.252664	0.303289	0.234304	0.252664	0.271173	0.28558	0.252318	0.282976	0.2406	0.248568	0.261804	0.28117	0.23685	0.295242	0.252318	0.261503	0.282559	0.258894	0.282266	0.324643	0.262943	0.256638	0.241908	0.259643	0.258568	0.213009	0.209988	0.296062	0.283673	0.284832	0.209988	0.271062	0.248568	0.256661	0.251485	0.326309
0.0849229	0.128024	0.145177	0.194741	0.110385	0.112518	0.103847	0.124784	0.103985	0.145067	0.108979	0.190489	0.112382	0.175536	0.103456	0.191581	0.0850966	0.103456	0.106132	0.151095	0.0953331	0.149324	0.0836143	0.0990831	0.135097	0.169741	0.0873644	0.176034	0.0953331	0.127573	0.132518	0.170489	0.101948	0.175157	0.120958	0.187584	0.0849229	0.132657	0.139083	0.139882	0.114083	0.215157	0.141132	0.203927	0.114083	0.190157	0.114083	0.176034	0.0789442	0.161268
0.153915	0.170358	0.184521	0.206849	0.19939	0.160998	0.182769	0.16803	0.17013	0.159787	0.200328	0.214208	0.184	0.179162	0.157561	0.208342	0.145686	0.157561	0.18275	0.195478	0.160771	0.174905	0.154911	0.159521	0.168967	0.184349	0.153661	0.20178	0.160771	0.160736	0.195582	0.17981	0.196578	0.217821	0.170536	0.181558	0.153915	0.175165	0.179521	0.148768	0.141372	0.214673	0.2015	0.206372	0.141372	0.192173	0.164521	0.178632	0.17814	0.221988
0.144229	0.18233	0.189483	0.272935	0.161358	0.186269	0.154263	0.193534	0.153847	0.294681	0.144951	0.224795	0.152799	0.32015	0.177206	0.245331	0.153847	0.177206	0.151549	0.225401	0.159639	0.241963	0.14792	0.158389	0.188847	0.227935	0.14667	0.249784	0.159639	0.195767	0.172935	0.301956	0.15292	0.259463	0.175264	0.351643	0.144229	0.176963	0.178389	0.265792	0.240549	0.356624	0.181549	0.345393	0.240549	0.311624	0.163389	0.326945	0.129361	0.216685
0.166584	0.178772	0.191955	0.214848	0.18594	0.174379	0.178077	0.186567	0.165994	0.16194	0.170315	0.205393	0.177511	0.190377	0.177192	0.209536	0.162661	0.177192	0.181261	0.189553	0.174143	0.210959	0.164377	0.167893	0.178754	0.197348	0.158127	0.200317	0.174143	0.188032	0.184796	0.186211	0.189377	0.229709	0.177815	0.194579	0.166584	0.170491	0.167893	0.149162	0.147461	0.214277	0.182511	0.204023	0.147461	0.196777	0.162893	0.184885	0.169933	0.227765
0.0959836	0.148951	0.143503	0.188353	0.124493	0.120402	0.115324	0.135324	0.104629	0.130581	0.0990239	0.167566	0.117062	0.167612	0.117589	0.177277	0.0940739	0.117589	0.118312	0.151062	0.109597	0.167103	0.0939719	0.105847	0.129386	0.158353	0.0902219	0.169074	0.109597	0.135482	0.132902	0.165066	0.122305	0.197937	0.124128	0.180077	0.0959836	0.118874	0.115847	0.114562	0.105847	0.207937	0.133312	0.194753	0.105847	0.177937	0.105847	0.169074	0.0869059	0.185714
0.19497	0.197748	0.210576	0.245821	0.229195	0.206012	0.214033	0.211168	0.199727	0.194623	0.218258	0.227138	0.208388	0.212123	0.205699	0.233356	0.191949	0.205699	0.212138	0.232783	0.203701	0.23346	0.197841	0.197451	0.200231	0.215821	0.191591	0.237418	0.203701	0.205333	0.216845	0.214206	0.229508	0.265126	0.203466	0.223477	0.19497	0.198095	0.197451	0.179623	0.177019	0.249694	0.219638	0.241394	0.177019	0.219694	0.192451	0.221986	0.212529	0.255126
0.100091	0.131672	0.145345	0.197409	0.123053	0.126436	0.115265	0.137452	0.110403	0.182858	0.110397	0.176907	0.11755	0.212077	0.121124	0.185499	0.101515	0.121124	0.1163	0.158763	0.111751	0.169492	0.100032	0.110501	0.136515	0.167409	0.0987824	0.178702	0.111751	0.138991	0.133936	0.200272	0.118366	0.192825	0.127376	0.227876	0.100091	0.129075	0.130501	0.163414	0.146365	0.24369	0.1388	0.232459	0.146365	0.21369	0.115501	0.209566	0.0941122	0.173936
0.218108	0.223133	0.238596	0.265096	0.25219	0.226242	0.238143	0.234601	0.222726	0.216237	0.238596	0.253909	0.234725	0.238893	0.227179	0.257492	0.212726	0.227179	0.238475	0.250374	0.226565	0.254124	0.218753	0.220315	0.224914	0.240096	0.212502	0.255851	0.226565	0.229881	0.242908	0.238477	0.253752	0.286624	0.228284	0.245386	0.218108	0.221936	0.220315	0.200126	0.199883	0.271191	0.243475	0.261914	0.199883	0.246191	0.215315	0.240419	0.233006	0.283846
0.159394	0.205031	0.206914	0.274264	0.195403	0.195063	0.182485	0.206235	0.17179	0.3018	0.166185	0.234726	0.180473	0.335081	0.1885	0.251938	0.161235	0.1885	0.181723	0.236972	0.176758	0.245514	0.161133	0.173008	0.196547	0.229264	0.157383	0.254984	0.176758	0.202643	0.200063	0.316887	0.189466	0.283847	0.191289	0.358797	0.159394	0.186035	0.183008	0.262633	0.250168	0.371008	0.204223	0.357824	0.250168	0.326008	0.173008	0.332145	0.150317	0.256625
0.167187	0.173597	0.187675	0.218619	0.194602	0.177543	0.182777	0.185902	0.169583	0.185378	0.181008	0.202988	0.179359	0.208034	0.17848	0.208793	0.164027	0.17848	0.183109	0.199452	0.175644	0.209869	0.167831	0.169394	0.176215	0.193619	0.161581	0.207152	0.175644	0.183404	0.187543	0.202988	0.196165	0.235702	0.177363	0.216749	0.167187	0.171015	0.169394	0.166859	0.164394	0.235702	0.188109	0.226425	0.164394	0.210702	0.164394	0.207152	0.17764	0.22848
0.0755319	0.125608	0.120786	0.192989	0.0889109	0.111947	0.0836917	0.121088	0.083275	0.222235	0.0743796	0.154223	0.0841018	0.249578	0.104759	0.171009	0.083275	0.104759	0.0828518	0.145454	0.0890671	0.165766	0.0773484	0.0878171	0.118275	0.155489	0.0760984	0.169838	0.0890671	0.125196	0.102364	0.227634	0.0823484	0.179516	0.104692	0.275446	0.0755319	0.106391	0.107817	0.193346	0.169978	0.276677	0.109102	0.265446	0.169978	0.239177	0.0928171	0.246998	0.0606643	0.144239
0.147259	0.145306	0.155364	0.175332	0.170651	0.149412	0.159099	0.157068	0.143405	0.141942	0.157213	0.161927	0.153455	0.161942	0.154099	0.166755	0.142849	0.154099	0.159705	0.162571	0.153489	0.179082	0.14763	0.144739	0.14363	0.155332	0.13888	0.165818	0.153489	0.154844	0.156912	0.156711	0.175963	0.199915	0.148255	0.166908	0.147259	0.137884	0.134739	0.123239	0.127023	0.182199	0.154705	0.173898	0.127023	0.162199	0.134739	0.158102	0.162595	0.197693
0.135569	0.162657	0.170705	0.220273	0.157138	0.159631	0.148589	0.171975	0.137617	0.260748	0.12995	0.187893	0.146226	0.293248	0.158694	0.2026	0.136506	0.158694	0.149976	0.184944	0.14883	0.209996	0.135158	0.14258	0.160412	0.187773	0.128908	0.200725	0.14883	0.172754	0.159214	0.268803	0.156825	0.232912	0.156408	0.30981	0.135569	0.147131	0.14258	0.221303	0.214741	0.310073	0.158726	0.297866	0.214741	0.277573	0.13758	0.277885	0.126929	0.213746
0.171676	0.178087	0.192165	0.223109	0.199092	0.182032	0.187267	0.190392	0.174072	0.189867	0.185498	0.207477	0.183849	0.212524	0.18297	0.213282	0.168517	0.18297	0.187599	0.203942	0.180133	0.214359	0.172321	0.173883	0.180704	0.198109	0.166071	0.211642	0.180133	0.187894	0.192032	0.207477	0.200654	0.240192	0.181852	0.221239	0.171676	0.175505	0.173883	0.171349	0.168883	0.240192	0.192599	0.230915	0.168883	0.215192	0.168883	0.211642	0.18213	0.23297
0.204033	0.235969	0.249287	0.30899	0.249912	0.234198	0.233443	0.242089	0.223026	0.293051	0.234131	0.283975	0.232603	0.319145	0.225761	0.293261	0.203026	0.225761	0.231353	0.281455	0.218819	0.269268	0.2071	0.217569	0.238026	0.26649	0.20585	0.295839	0.218819	0.234947	0.252115	0.313589	0.2421	0.315518	0.234444	0.338763	0.204033	0.236143	0.237568	0.268051	0.253433	0.366382	0.260103	0.355151	0.253433	0.323882	0.222568	0.326703	0.209166	0.29524
0.221291	0.228191	0.241779	0.279529	0.259123	0.23505	0.243201	0.241534	0.227784	0.22317	0.243654	0.258967	0.237908	0.243951	0.234112	0.2663	0.217784	0.234112	0.241658	0.264807	0.231623	0.264807	0.223811	0.225373	0.229972	0.247029	0.217561	0.270284	0.231623	0.234939	0.247966	0.247285	0.258811	0.301057	0.233342	0.25607	0.221291	0.226994	0.225373	0.207059	0.204941	0.285625	0.250408	0.276347	0.204941	0.253125	0.220373	0.254852	0.236189	0.290779
0.144673	0.192774	0.204927	0.282269	0.183469	0.186158	0.170819	0.193423	0.169847	0.24491	0.177063	0.25524	0.174354	0.270379	0.172095	0.26522	0.148736	0.172095	0.168104	0.240845	0.160083	0.225741	0.148365	0.163833	0.198736	0.237269	0.152115	0.264673	0.160083	0.190101	0.199491	0.268388	0.170031	0.264908	0.185708	0.296316	0.144673	0.197408	0.203833	0.231669	0.201982	0.328056	0.213104	0.316825	0.201982	0.283056	0.178833	0.287821	0.140917	0.233241
0.211338	0.222749	0.231827	0.297215	0.242087	0.238916	0.227484	0.242276	0.216512	0.209437	0.223493	0.252139	0.219066	0.227093	0.234854	0.270166	0.215401	0.234854	0.222816	0.273604	0.224795	0.280687	0.216983	0.218545	0.227588	0.252215	0.210733	0.283526	0.224795	0.237	0.23225	0.238991	0.23865	0.309854	0.226514	0.25303	0.211338	0.220166	0.218545	0.200085	0.190397	0.286706	0.237816	0.277429	0.190397	0.241706	0.213545	0.260378	0.217347	0.278187
0.112718	0.19381	0.197738	0.289394	0.136644	0.166789	0.132128	0.178586	0.141711	0.233658	0.13305	0.262425	0.143241	0.267564	0.148352	0.273664	0.121711	0.148352	0.131991	0.224046	0.129457	0.219671	0.113832	0.138207	0.194524	0.246894	0.122582	0.262336	0.129457	0.183397	0.174706	0.264323	0.118832	0.245921	0.168988	0.297182	0.112718	0.188734	0.198207	0.230973	0.186355	0.329069	0.190741	0.315886	0.186355	0.28657	0.163207	0.285484	0.088085	0.205644
0.159268	0.21901	0.236788	0.299832	0.19236	0.197784	0.184789	0.212081	0.186317	0.215053	0.186267	0.291475	0.195902	0.25146	0.184346	0.294659	0.160206	0.184346	0.187152	0.248096	0.173506	0.239555	0.157881	0.179756	0.225518	0.267332	0.164131	0.278331	0.173506	0.213836	0.222367	0.254793	0.179548	0.274971	0.208038	0.268022	0.159268	0.222784	0.229756	0.215887	0.184324	0.309539	0.233402	0.296355	0.184324	0.277039	0.199756	0.262898	0.145746	0.255805
0.060158	0.128359	0.135412	0.206365	0.0797869	0.100948	0.0764427	0.111964	0.0860261	0.243111	0.0871307	0.196974	0.0887279	0.272329	0.0856354	0.20001	0.0660261	0.0856354	0.0774779	0.14883	0.0718182	0.142892	0.0600994	0.0805682	0.131026	0.176365	0.0688494	0.183214	0.0718182	0.117947	0.115115	0.246635	0.0650994	0.162892	0.107443	0.292572	0.060158	0.129142	0.140568	0.224222	0.182729	0.300053	0.129978	0.288822	0.182729	0.270053	0.105568	0.260374	0.0452904	0.135115
0.17638	0.184413	0.201751	0.2202	0.202402	0.181953	0.192318	0.19414	0.178012	0.22189	0.186777	0.215189	0.191751	0.250328	0.184766	0.217109	0.170234	0.184766	0.195501	0.199349	0.183939	0.214088	0.174173	0.177689	0.186328	0.2027	0.167923	0.20789	0.183939	0.193383	0.199036	0.234587	0.20584	0.239505	0.187611	0.252307	0.17638	0.180286	0.177689	0.195316	0.195837	0.262653	0.196751	0.252399	0.195837	0.245153	0.172689	0.231039	0.184173	0.242005
0.0755319	0.125608	0.120786	0.192989	0.0889109	0.111947	0.0836917	0.121088	0.083275	0.222235	0.0743796	0.154223	0.0841018	0.249578	0.104759	0.171009	0.083275	0.104759	0.0828518	0.145454	0.0890671	0.165766	0.0773484	0.0878171	0.118275	0.155489	0.0760984	0.169838	0.0890671	0.125196	0.102364	0.227634	0.0823484	0.179516	0.104692	0.275446	0.0755319	0.106391	0.107817	0.193346	0.169978	0.276677	0.109102	0.265446	0.169978	0.239177	0.0928171	0.246998	0.0606643	0.144239
0.147259	0.145306	0.155364	0.175332	0.170651	0.149412	0.159099	0.157068	0.143405	0.141942	0.157213	0.161927	0.153455	0.161942	0.154099	0.166755	0.142849	0.154099	0.159705	0.162571	0.153489	0.179082	0.14763	0.144739	0.14363	0.155332	0.13888	0.165818	0.153489	0.154844	0.156912	0.156711	0.175963	0.199915	0.148255	0.166908	0.147259	0.137884	0.134739	0.123239	0.127023	0.182199	0.154705	0.173898	0.127023	0.162199	0.134739	0.158102	0.162595	0.197693
0.0628673	0.104819	0.100621	0.138241	0.0874962	0.0807405	0.0787353	0.0930062	0.069152	0.103042	0.0710899	0.123434	0.0797705	0.133511	0.079178	0.129803	0.0608186	0.079178	0.0810205	0.106539	0.0732774	0.120602	0.0615587	0.0695274	0.0883187	0.113241	0.0578087	0.121756	0.0732774	0.0935726	0.0924072	0.12615	0.0865587	0.145602	0.0839024	0.143337	0.0628673	0.0806016	0.0795274	0.0858199	0.0772435	0.163318	0.0935205	0.152087	0.0772435	0.138318	0.0695274	0.129472	0.061333	0.136157
0.180743	0.183538	0.193731	0.219953	0.208992	0.187488	0.196056	0.195847	0.17925	0.178903	0.190398	0.201544	0.190138	0.201559	0.190925	0.208738	0.176472	0.190925	0.196388	0.205509	0.1892	0.220092	0.181388	0.18045	0.18116	0.194953	0.172638	0.209597	0.1892	0.192238	0.195821	0.198828	0.213054	0.246759	0.185919	0.209163	0.180743	0.174571	0.17045	0.159088	0.162734	0.229043	0.193888	0.219765	0.162734	0.204043	0.17045	0.201881	0.193419	0.241759
0.152831	0.221592	0.23785	0.30645	0.19759	0.195374	0.186546	0.208421	0.188351	0.231147	0.195246	0.301288	0.198909	0.266303	0.178186	0.302249	0.152796	0.178186	0.187659	0.256659	0.168319	0.23145	0.152694	0.177069	0.225608	0.26895	0.161444	0.287171	0.168319	0.206704	0.229124	0.269821	0.181027	0.278534	0.20785	0.284393	0.152831	0.227596	0.237069	0.229943	0.194353	0.330818	0.243909	0.317634	0.194353	0.293318	0.202069	0.279455	0.143753	0.258811
0.17507	0.208899	0.225207	0.261858	0.207889	0.195174	0.197883	0.209393	0.188577	0.186098	0.192577	0.255519	0.202394	0.220473	0.191112	0.258143	0.170799	0.191112	0.201144	0.228195	0.186457	0.231997	0.172785	0.185207	0.209706	0.236858	0.171535	0.245643	0.186457	0.208714	0.218508	0.222371	0.204452	0.266164	0.204035	0.228077	0.17507	0.204758	0.205207	0.178413	0.167059	0.263016	0.221144	0.250809	0.167059	0.238016	0.190207	0.222495	0.173098	0.261164
0.132917	0.189768	0.208171	0.285234	0.170879	0.176762	0.16059	0.185278	0.165729	0.21053	0.175723	0.272233	0.170376	0.237249	0.15895	0.275825	0.13684	0.15895	0.159126	0.236589	0.147077	0.212318	0.135358	0.155827	0.20184	0.245234	0.144108	0.266528	0.147077	0.184317	0.199262	0.242017	0.153692	0.250651	0.182702	0.260547	0.132917	0.204401	0.215827	0.212659	0.173111	0.302935	0.216626	0.291705	0.173111	0.262935	0.180827	0.258812	0.126938	0.221762
0.132081	0.155519	0.172452	0.207845	0.158936	0.148626	0.149824	0.159564	0.142741	0.139906	0.152061	0.202139	0.153008	0.167093	0.145189	0.203782	0.129407	0.145189	0.151758	0.17755	0.140889	0.181456	0.131124	0.139639	0.160501	0.185345	0.129874	0.193314	0.140889	0.159778	0.166543	0.167741	0.156124	0.207706	0.154561	0.175045	0.132081	0.157237	0.159639	0.134443	0.121491	0.204558	0.170508	0.194304	0.121491	0.182058	0.144639	0.170165	0.135429	0.200761
0.0748729	0.0979706	0.105478	0.173918	0.0786815	0.105012	0.0751159	0.109543	0.0780326	0.105806	0.077119	0.137666	0.0738464	0.122681	0.0990743	0.152356	0.0846993	0.0990743	0.0725964	0.131435	0.0842284	0.152529	0.078369	0.0829784	0.107981	0.141418	0.077119	0.153293	0.0842284	0.115305	0.0879284	0.1237	0.073369	0.153779	0.093994	0.148133	0.0748729	0.0986229	0.102978	0.105714	0.0802623	0.166063	0.0963464	0.157762	0.0802623	0.133563	0.0879783	0.145577	0.067987	0.116835
0.16518	0.16924	0.175903	0.209477	0.208299	0.173922	0.189312	0.1765	0.172785	0.155076	0.200643	0.193091	0.182066	0.168044	0.172984	0.197359	0.160562	0.172984	0.185816	0.20479	0.173559	0.193644	0.169653	0.167309	0.164937	0.176977	0.163403	0.20525	0.173559	0.166841	0.190172	0.173692	0.207986	0.233227	0.171372	0.179051	0.16518	0.166977	0.167309	0.140168	0.139161	0.210079	0.194566	0.202755	0.139161	0.177579	0.162309	0.182102	0.192066	0.225172
0.166002	0.213869	0.221022	0.28865	0.207845	0.20306	0.193815	0.214231	0.184509	0.258223	0.183626	0.256334	0.194303	0.291504	0.193997	0.269935	0.166731	0.193997	0.193053	0.25108	0.183365	0.248789	0.16774	0.182115	0.209544	0.24365	0.16649	0.270481	0.183365	0.209529	0.216393	0.287198	0.199407	0.292955	0.202897	0.314108	0.166002	0.202643	0.202116	0.234334	0.21798	0.34382	0.223053	0.330636	0.21798	0.29882	0.187116	0.301346	0.159147	0.267955
0.215437	0.243016	0.250574	0.302503	0.25409	0.24068	0.239222	0.251149	0.223805	0.244058	0.225027	0.269637	0.234984	0.274683	0.237868	0.283649	0.213805	0.237868	0.238734	0.276062	0.230574	0.284031	0.216902	0.224324	0.237712	0.262503	0.210652	0.287399	0.230574	0.245609	0.249847	0.277137	0.251902	0.324031	0.238152	0.292426	0.215437	0.228875	0.224324	0.223317	0.219324	0.324031	0.251234	0.311824	0.219324	0.284031	0.219324	0.287399	0.215687	0.306253
0.140235	0.192441	0.215489	0.290192	0.161114	0.1829	0.157145	0.193291	0.166728	0.224129	0.167833	0.277677	0.168805	0.252723	0.166963	0.281963	0.146728	0.166963	0.157555	0.232657	0.15252	0.22547	0.140802	0.16127	0.211728	0.257692	0.149552	0.267041	0.15252	0.198649	0.195817	0.251427	0.145802	0.24672	0.188145	0.274841	0.140235	0.209845	0.22127	0.228388	0.18627	0.30672	0.211305	0.295489	0.18627	0.27422	0.18627	0.267041	0.125368	0.216442
0.178584	0.201262	0.218955	0.253654	0.213356	0.194782	0.201397	0.205095	0.192091	0.19769	0.205856	0.249268	0.203955	0.224252	0.19072	0.249938	0.174313	0.19072	0.202705	0.227803	0.188018	0.223793	0.178252	0.186768	0.205407	0.228654	0.177002	0.241345	0.188018	0.202462	0.218115	0.223836	0.209919	0.257959	0.20169	0.231857	0.178584	0.204365	0.206768	0.18769	0.176336	0.262527	0.222705	0.252273	0.176336	0.237527	0.191768	0.225913	0.186377	0.252959
0.144486	0.162299	0.169857	0.2465	0.145092	0.179157	0.141604	0.185719	0.139521	0.271462	0.123842	0.18892	0.135413	0.294275	0.176344	0.214313	0.156188	0.176344	0.139163	0.201205	0.15767	0.241361	0.147904	0.15142	0.172282	0.2065	0.141654	0.221969	0.15767	0.191559	0.148323	0.27358	0.142904	0.241361	0.161342	0.325351	0.144486	0.154018	0.15142	0.240907	0.22358	0.318522	0.151663	0.308268	0.22358	0.278522	0.14642	0.29913	0.127835	0.196917
0.150825	0.162118	0.176196	0.219228	0.160597	0.16869	0.155304	0.179002	0.147665	0.159962	0.143097	0.191509	0.152863	0.186524	0.169627	0.203846	0.153221	0.169627	0.156613	0.185044	0.160259	0.216034	0.150493	0.154009	0.169315	0.194228	0.144243	0.200252	0.160259	0.183037	0.162023	0.183793	0.16216	0.2252	0.163931	0.200795	0.150825	0.156606	0.154009	0.149314	0.141293	0.217484	0.161613	0.20723	0.141293	0.192484	0.149009	0.192536	0.145285	0.206867
0.132344	0.170328	0.182481	0.21691	0.168496	0.151337	0.157379	0.165556	0.146962	0.173464	0.153184	0.212793	0.16189	0.207839	0.147274	0.214306	0.126962	0.147274	0.16064	0.185469	0.143731	0.185938	0.130059	0.142481	0.165868	0.19191	0.128809	0.201806	0.143731	0.163765	0.178004	0.202793	0.165059	0.223438	0.161309	0.214332	0.132344	0.162031	0.162481	0.157724	0.147481	0.243438	0.18064	0.231231	0.147481	0.218438	0.147481	0.201806	0.132593	0.22066
0.149729	0.161679	0.170217	0.194494	0.187144	0.156751	0.171986	0.165111	0.155458	0.16792	0.17355	0.18553	0.168568	0.190576	0.157689	0.188001	0.143236	0.157689	0.172318	0.181994	0.158186	0.182411	0.150373	0.151936	0.155423	0.169494	0.144123	0.186361	0.158186	0.159279	0.176751	0.18553	0.188707	0.218244	0.159904	0.195958	0.149729	0.153557	0.151936	0.146068	0.146936	0.218244	0.177318	0.208967	0.146936	0.193244	0.146936	0.186361	0.166849	0.217689
0.126856	0.187102	0.20211	0.282923	0.166068	0.172576	0.155154	0.180467	0.160293	0.21575	0.170287	0.266797	0.164314	0.241843	0.154139	0.271639	0.131404	0.154139	0.153064	0.234277	0.141641	0.208757	0.129922	0.150391	0.196404	0.240423	0.138672	0.264217	0.141641	0.17888	0.193826	0.245547	0.148255	0.24834	0.177266	0.267017	0.126856	0.198965	0.210391	0.215564	0.175391	0.30834	0.211814	0.29711	0.175391	0.26584	0.175391	0.264217	0.120877	0.216951
0.106858	0.122964	0.127347	0.162735	0.127607	0.119436	0.118004	0.127796	0.107032	0.0849257	0.114013	0.142659	0.114586	0.107582	0.120374	0.150686	0.105921	0.120374	0.118336	0.139124	0.115315	0.156207	0.107503	0.109065	0.118108	0.137735	0.101253	0.149046	0.115315	0.12752	0.12277	0.111795	0.12917	0.175374	0.117034	0.118519	0.106858	0.110686	0.109065	0.0778886	0.0732011	0.14451	0.123336	0.135232	0.0732011	0.11951	0.104065	0.118182	0.112867	0.163707
0.0816878	0.142105	0.151707	0.204752	0.10978	0.113953	0.103459	0.1295	0.102486	0.245344	0.0999365	0.197645	0.113322	0.283	0.104266	0.200828	0.0813753	0.104266	0.107072	0.155516	0.0946761	0.156974	0.0790511	0.0984261	0.139188	0.177252	0.0828011	0.18325	0.0946761	0.132506	0.136037	0.256055	0.100718	0.187391	0.124207	0.295812	0.0816878	0.133953	0.138426	0.215899	0.190587	0.304551	0.143322	0.291368	0.190587	0.277051	0.113426	0.260411	0.0681657	0.173224
0.114669	0.142887	0.15504	0.196405	0.139441	0.1342	0.130814	0.144512	0.124842	0.103682	0.131941	0.185352	0.133373	0.130244	0.130137	0.189356	0.113731	0.130137	0.132123	0.163887	0.124102	0.169877	0.114336	0.122852	0.144825	0.171405	0.113086	0.180762	0.124102	0.145213	0.147533	0.136772	0.136003	0.194044	0.137774	0.141182	0.114669	0.14045	0.142852	0.103959	0.0892719	0.175463	0.152123	0.165209	0.0892719	0.150463	0.127852	0.142182	0.115795	0.182377
0.110508	0.186092	0.190645	0.275352	0.137494	0.15964	0.131515	0.170109	0.139987	0.169036	0.138431	0.254707	0.142277	0.199661	0.141827	0.262609	0.117765	0.141827	0.131027	0.216133	0.125645	0.205768	0.111973	0.134395	0.186671	0.235352	0.120723	0.251359	0.125645	0.173457	0.17214	0.209059	0.120306	0.234102	0.163223	0.226293	0.110508	0.183945	0.194395	0.179128	0.136247	0.270954	0.188527	0.258747	0.136247	0.230954	0.159395	0.22821	0.0929797	0.198546
0.173061	0.218154	0.235932	0.28938	0.219083	0.202384	0.205249	0.210821	0.203443	0.195824	0.224708	0.29062	0.213432	0.220512	0.188946	0.28754	0.170665	0.188946	0.204682	0.25603	0.18437	0.225769	0.174604	0.19062	0.224259	0.25688	0.180854	0.277071	0.18437	0.206314	0.236967	0.230789	0.206271	0.271186	0.213042	0.233741	0.173061	0.230717	0.24062	0.200269	0.172039	0.282606	0.250932	0.272352	0.172039	0.250106	0.21062	0.238491	0.180854	0.258686
0.122752	0.183609	0.207772	0.269427	0.136678	0.161823	0.137162	0.17862	0.146745	0.21363	0.138084	0.267459	0.153275	0.252536	0.148386	0.268698	0.126745	0.148386	0.142025	0.20408	0.13449	0.209705	0.118865	0.14324	0.199558	0.246927	0.127615	0.24237	0.13449	0.188431	0.17974	0.243925	0.123865	0.225955	0.174022	0.267154	0.122752	0.193768	0.20324	0.215574	0.175956	0.293671	0.190775	0.280488	0.175956	0.271171	0.16824	0.250086	0.0981187	0.205677
0.251162	0.297863	0.321181	0.360059	0.286754	0.276344	0.278349	0.293141	0.274043	0.271885	0.27816	0.365869	0.289462	0.310791	0.267906	0.363219	0.246266	0.267906	0.283212	0.31749	0.2629	0.311448	0.247275	0.26665	0.304078	0.337559	0.251025	0.341891	0.2629	0.294063	0.310927	0.313754	0.278941	0.349365	0.292431	0.316521	0.251162	0.302177	0.30665	0.271515	0.250786	0.3585	0.316962	0.345317	0.250786	0.336	0.28165	0.311027	0.244306	0.346865
0.117069	0.169275	0.192323	0.264803	0.141281	0.158623	0.136201	0.169013	0.144673	0.301272	0.148	0.25451	0.147861	0.329865	0.142685	0.257685	0.122451	0.142685	0.136611	0.209491	0.129354	0.19897	0.117635	0.138104	0.187451	0.232303	0.126385	0.242763	0.129354	0.17326	0.174873	0.305421	0.125969	0.223553	0.164979	0.350872	0.117069	0.186678	0.198104	0.281272	0.240265	0.360714	0.190361	0.349483	0.240265	0.328214	0.163104	0.319924	0.104424	0.195498
0.151403	0.154078	0.162126	0.206811	0.177855	0.1657	0.164424	0.168278	0.153452	0.16136	0.170199	0.179314	0.157178	0.174329	0.164763	0.189138	0.152341	0.164763	0.160928	0.191013	0.159782	0.196534	0.155876	0.153532	0.156716	0.174311	0.149626	0.197028	0.159782	0.164175	0.165284	0.175347	0.177543	0.21945	0.157595	0.190891	0.151403	0.1532	0.153532	0.147379	0.140816	0.211734	0.169678	0.20441	0.140816	0.179234	0.148532	0.189312	0.167178	0.200284
0.159738	0.189561	0.200109	0.263279	0.199926	0.190172	0.184703	0.196109	0.176508	0.307964	0.188051	0.234796	0.182886	0.330151	0.181734	0.245328	0.160953	0.181734	0.181636	0.235206	0.173546	0.225779	0.163781	0.172296	0.192047	0.220779	0.162531	0.249859	0.173546	0.190213	0.201422	0.310707	0.192114	0.265363	0.187218	0.351991	0.159738	0.189894	0.192296	0.271297	0.254457	0.362523	0.210386	0.352269	0.254457	0.320023	0.177296	0.32702	0.165308	0.24064
0.188656	0.209711	0.224144	0.26245	0.238155	0.205193	0.22001	0.211677	0.207371	0.26069	0.232686	0.256332	0.219717	0.281471	0.199255	0.256443	0.182927	0.199255	0.218467	0.247172	0.198988	0.225505	0.191176	0.197738	0.210114	0.22995	0.189926	0.255427	0.198988	0.20286	0.234776	0.27323	0.232842	0.273422	0.210707	0.291367	0.188656	0.214359	0.217738	0.235782	0.225886	0.31657	0.242217	0.307293	0.225886	0.28407	0.202738	0.278575	0.207999	0.267588
0.126685	0.174008	0.197056	0.259671	0.165207	0.161842	0.154706	0.170279	0.158734	0.309911	0.175832	0.259244	0.16539	0.334599	0.145904	0.256998	0.127623	0.145904	0.15414	0.217154	0.137994	0.189394	0.128228	0.146744	0.188717	0.227171	0.136978	0.244029	0.137994	0.169105	0.191425	0.310154	0.149895	0.22731	0.171666	0.351161	0.126685	0.194342	0.206744	0.285467	0.248904	0.364471	0.20789	0.354217	0.248904	0.331971	0.171744	0.32119	0.127812	0.208144
0.190933	0.199218	0.211421	0.251393	0.225431	0.205802	0.21062	0.212287	0.196315	0.242966	0.209963	0.228608	0.205327	0.263747	0.204865	0.237052	0.188537	0.204865	0.209077	0.234448	0.201265	0.237782	0.193452	0.195015	0.200724	0.218893	0.187202	0.241037	0.201265	0.206803	0.215386	0.255507	0.225119	0.270698	0.202983	0.276976	0.190933	0.196636	0.195015	0.216392	0.213163	0.293846	0.217827	0.284569	0.213163	0.261346	0.190015	0.264185	0.203608	0.258198
0.150981	0.204827	0.221	0.295017	0.18199	0.193732	0.173654	0.206154	0.173793	0.220578	0.169021	0.270063	0.180393	0.255109	0.18092	0.280607	0.154904	0.18092	0.174143	0.243559	0.167094	0.2421	0.151469	0.170844	0.212717	0.255017	0.155219	0.272404	0.167094	0.207146	0.206232	0.257563	0.169802	0.275434	0.196625	0.278408	0.150981	0.206371	0.210844	0.215393	0.185844	0.315434	0.216643	0.30225	0.185844	0.275434	0.185844	0.272404	0.135236	0.246545
0.139834	0.146767	0.15544	0.199574	0.160726	0.15532	0.150008	0.160476	0.140147	0.149517	0.149788	0.172002	0.144363	0.167017	0.155008	0.182664	0.141258	0.155008	0.148113	0.177647	0.148565	0.191657	0.142705	0.142315	0.149539	0.169574	0.136455	0.186726	0.148565	0.159085	0.15282	0.166786	0.161038	0.20999	0.14833	0.182816	0.139834	0.142959	0.142315	0.136647	0.129598	0.202274	0.155613	0.193973	0.129598	0.172274	0.137315	0.17901	0.148504	0.191101
0.117787	0.153626	0.167924	0.214992	0.141857	0.1431	0.134558	0.156694	0.128586	0.260467	0.125919	0.198862	0.138445	0.294217	0.138412	0.206069	0.117475	0.138412	0.137195	0.174662	0.129799	0.187215	0.116127	0.128549	0.156381	0.187492	0.114877	0.195444	0.129799	0.158723	0.155183	0.267272	0.137794	0.212631	0.147377	0.307029	0.117787	0.1481	0.148549	0.226022	0.21071	0.309792	0.158445	0.297585	0.21071	0.282292	0.133549	0.272604	0.109148	0.198465
0.140987	0.143157	0.153975	0.183114	0.157986	0.14919	0.149008	0.158174	0.135536	0.248236	0.140017	0.161163	0.143715	0.271518	0.153253	0.17044	0.139424	0.153253	0.149965	0.162003	0.148819	0.187836	0.141006	0.140069	0.144112	0.160614	0.132256	0.169424	0.148819	0.158524	0.148773	0.242073	0.162673	0.203253	0.145538	0.28058	0.140987	0.13419	0.130069	0.206292	0.207229	0.270413	0.146215	0.261136	0.207229	0.247913	0.130069	0.246585	0.146996	0.194086
0.134748	0.185587	0.207384	0.257508	0.172983	0.165338	0.163463	0.178932	0.162769	0.307427	0.172046	0.260822	0.17485	0.341177	0.153151	0.258307	0.132213	0.153151	0.1661	0.214123	0.146759	0.197508	0.133088	0.153009	0.193619	0.230008	0.139338	0.240182	0.146759	0.178739	0.199088	0.314232	0.161421	0.237092	0.179338	0.351767	0.134748	0.19506	0.203009	0.27826	0.25017	0.364252	0.20985	0.352045	0.25017	0.336752	0.173009	0.317342	0.130553	0.227369
0.183136	0.195324	0.208507	0.224733	0.212491	0.187598	0.201296	0.199785	0.185879	0.15843	0.196866	0.221945	0.200729	0.186867	0.19041	0.222754	0.175879	0.19041	0.204479	0.206105	0.190695	0.217511	0.180929	0.184445	0.191973	0.207233	0.174679	0.213535	0.190695	0.197917	0.208014	0.18733	0.215929	0.246261	0.194366	0.187735	0.183136	0.187042	0.184445	0.146948	0.14858	0.215397	0.205729	0.205143	0.14858	0.197897	0.179445	0.182671	0.193151	0.250983
0.132344	0.170328	0.182481	0.21691	0.168496	0.151337	0.157379	0.165556	0.146962	0.173464	0.153184	0.212793	0.16189	0.207839	0.147274	0.214306	0.126962	0.147274	0.16064	0.185469	0.143731	0.185938	0.130059	0.142481	0.165868	0.19191	0.128809	0.201806	0.143731	0.163765	0.178004	0.202793	0.165059	0.223438	0.161309	0.214332	0.132344	0.162031	0.162481	0.157724	0.147481	0.243438	0.18064	0.231231	0.147481	0.218438	0.147481	0.201806	0.132593	0.22066
0.149729	0.161679	0.170217	0.194494	0.187144	0.156751	0.171986	0.165111	0.155458	0.16792	0.17355	0.18553	0.168568	0.190576	0.157689	0.188001	0.143236	0.157689	0.172318	0.181994	0.158186	0.182411	0.150373	0.151936	0.155423	0.169494	0.144123	0.186361	0.158186	0.159279	0.176751	0.18553	0.188707	0.218244	0.159904	0.195958	0.149729	0.153557	0.151936	0.146068	0.146936	0.218244	0.177318	0.208967	0.146936	0.193244	0.146936	0.186361	0.166849	0.217689
0.0837208	0.119475	0.126358	0.184953	0.0773732	0.113547	0.0795889	0.127766	0.0800055	0.21515	0.0570606	0.14917	0.0816006	0.249525	0.111985	0.166516	0.0916722	0.111985	0.0828506	0.129346	0.0951075	0.177315	0.0814357	0.0913575	0.123078	0.159953	0.0776856	0.156516	0.0951075	0.139309	0.0952139	0.221331	0.0764356	0.172315	0.107686	0.269351	0.0837208	0.103408	0.101358	0.187094	0.168518	0.259475	0.0953506	0.247268	0.168518	0.234475	0.0913575	0.233676	0.0573037	0.14287
0.128953	0.135633	0.149441	0.169829	0.144701	0.134031	0.137598	0.14489	0.126626	0.142143	0.133607	0.162253	0.13668	0.1673	0.137468	0.165281	0.125515	0.137468	0.14043	0.146218	0.13491	0.168301	0.127097	0.12866	0.137703	0.154829	0.120847	0.15614	0.13491	0.147114	0.142364	0.157253	0.148764	0.182468	0.136628	0.170737	0.128953	0.130281	0.12866	0.125847	0.12366	0.182468	0.14043	0.173191	0.12366	0.167468	0.12366	0.15614	0.134962	0.180801
0.145208	0.169388	0.180696	0.251085	0.180956	0.177786	0.166354	0.181145	0.160381	0.223491	0.172363	0.216009	0.162936	0.241147	0.168723	0.229036	0.14927	0.168723	0.161686	0.222473	0.158665	0.214557	0.150852	0.157415	0.176458	0.206085	0.149602	0.237395	0.158665	0.17587	0.181119	0.239157	0.172519	0.248723	0.170384	0.267085	0.145208	0.174036	0.177415	0.20525	0.185563	0.291872	0.191686	0.282594	0.185563	0.246872	0.162415	0.260543	0.151217	0.217057
0.19701	0.208555	0.217498	0.26872	0.235258	0.217504	0.218572	0.222114	0.204267	0.222701	0.217915	0.23656	0.211404	0.241607	0.214692	0.248754	0.196489	0.214692	0.215154	0.251775	0.209217	0.251359	0.201404	0.202967	0.208676	0.22872	0.195154	0.258364	0.209217	0.214755	0.223338	0.24406	0.233071	0.288025	0.210935	0.260461	0.19701	0.204588	0.202967	0.203071	0.197967	0.288025	0.227654	0.278748	0.197967	0.248025	0.197967	0.258364	0.209685	0.268025
0.0790718	0.134031	0.129209	0.197943	0.0981408	0.115218	0.091676	0.126311	0.0890371	0.156535	0.0797033	0.162646	0.0930627	0.187785	0.10803	0.178186	0.0845926	0.10803	0.0918127	0.150947	0.0935835	0.168499	0.0799116	0.0923335	0.123499	0.160443	0.0786617	0.175061	0.0935835	0.129174	0.112301	0.182044	0.0915783	0.188916	0.111162	0.211431	0.0790718	0.111884	0.112334	0.141628	0.120482	0.232064	0.118063	0.219857	0.120482	0.194564	0.0973335	0.19821	0.0637658	0.158082
0.149807	0.17061	0.190178	0.222515	0.167496	0.164824	0.161855	0.177012	0.156994	0.175193	0.161871	0.218615	0.166289	0.203631	0.162637	0.21998	0.148105	0.162637	0.165039	0.187776	0.157365	0.200848	0.1476	0.156115	0.179199	0.205015	0.14635	0.205762	0.157365	0.180699	0.178574	0.197149	0.165933	0.217932	0.171037	0.210054	0.149807	0.173713	0.176115	0.167323	0.153399	0.230216	0.181289	0.219962	0.153399	0.212716	0.161115	0.198046	0.148711	0.211543
0.14314	0.159078	0.168511	0.216126	0.166662	0.163296	0.15616	0.171733	0.145188	0.166057	0.147287	0.185698	0.151844	0.190744	0.162358	0.198452	0.144077	0.162358	0.155594	0.188608	0.154448	0.205848	0.144683	0.148198	0.160171	0.183626	0.138433	0.200483	0.154448	0.170559	0.162879	0.189448	0.166349	0.228765	0.15812	0.207307	0.14314	0.150796	0.148198	0.149761	0.143198	0.228765	0.164344	0.218511	0.143198	0.196265	0.143198	0.200483	0.144266	0.209598
0.173117	0.172769	0.188722	0.205217	0.201092	0.174783	0.189054	0.183064	0.174748	0.186581	0.193279	0.202159	0.186534	0.207206	0.177596	0.202127	0.166971	0.177596	0.190284	0.192179	0.178722	0.199106	0.172863	0.172472	0.175252	0.187717	0.166613	0.196814	0.178722	0.180354	0.191866	0.198409	0.204529	0.224523	0.178488	0.209185	0.173117	0.173116	0.172472	0.166951	0.167472	0.224523	0.191534	0.216222	0.167472	0.207023	0.167472	0.196814	0.190675	0.227023
0.196817	0.245021	0.261953	0.329855	0.243386	0.235046	0.229004	0.24489	0.224699	0.306811	0.233698	0.311641	0.234141	0.336811	0.221608	0.318015	0.196921	0.221608	0.227891	0.291192	0.212578	0.271244	0.198907	0.216328	0.250827	0.287355	0.202657	0.31364	0.212578	0.239835	0.259629	0.331255	0.230573	0.319161	0.240157	0.35754	0.196817	0.250879	0.256328	0.287922	0.262193	0.390025	0.271641	0.377818	0.262193	0.347525	0.231328	0.344504	0.194844	0.296661
0.196184	0.22187	0.241438	0.263641	0.229563	0.207599	0.219344	0.22174	0.208927	0.202485	0.220032	0.269875	0.224754	0.234829	0.205411	0.266661	0.188927	0.205411	0.223504	0.236106	0.204719	0.236418	0.193	0.203469	0.223927	0.246141	0.19175	0.25049	0.204719	0.220848	0.238016	0.232977	0.228	0.270168	0.220344	0.235697	0.196184	0.222043	0.223469	0.193689	0.185321	0.26702	0.239754	0.25579	0.185321	0.24952	0.208469	0.227341	0.201316	0.274891
0.137946	0.180032	0.195934	0.264101	0.182028	0.173163	0.167564	0.177773	0.167981	0.313946	0.189684	0.252497	0.172896	0.332852	0.157851	0.254413	0.139648	0.157851	0.164146	0.230212	0.150153	0.198962	0.142341	0.156403	0.189335	0.224101	0.148591	0.251523	0.150153	0.172636	0.19733	0.312157	0.167341	0.241462	0.176872	0.353928	0.137946	0.195524	0.206403	0.28589	0.253564	0.368622	0.214146	0.359345	0.253564	0.328622	0.176403	0.328683	0.146177	0.217017
0.170609	0.176664	0.183597	0.223291	0.199274	0.18409	0.185574	0.190574	0.16988	0.282858	0.178805	0.193285	0.177781	0.303639	0.185652	0.20534	0.169324	0.185652	0.184031	0.206624	0.180941	0.220791	0.173128	0.172191	0.174012	0.190791	0.164378	0.211824	0.180941	0.186201	0.18534	0.279195	0.201462	0.247874	0.17766	0.31798	0.170609	0.166312	0.162191	0.238692	0.239351	0.315035	0.185281	0.305758	0.239351	0.282535	0.162191	0.288985	0.181062	0.233152
0.130219	0.191701	0.215239	0.269534	0.162062	0.16561	0.156365	0.181782	0.160393	0.242409	0.162843	0.275552	0.171854	0.28069	0.151548	0.272485	0.129282	0.151548	0.160604	0.215298	0.142583	0.203006	0.126958	0.151333	0.202094	0.244534	0.135708	0.248032	0.142583	0.185413	0.198943	0.2687	0.148624	0.237173	0.182114	0.291628	0.130219	0.20186	0.211333	0.234168	0.199481	0.320321	0.210604	0.307137	0.199481	0.295321	0.176333	0.27118	0.116697	0.225506
0.179019	0.21773	0.234038	0.271666	0.210861	0.201076	0.201831	0.217248	0.192526	0.221116	0.191643	0.264351	0.20732	0.259397	0.197014	0.267951	0.174748	0.197014	0.20607	0.234097	0.191382	0.241805	0.175757	0.190132	0.217561	0.246666	0.174507	0.253498	0.191382	0.217545	0.224409	0.254351	0.207424	0.275972	0.210913	0.267001	0.179019	0.21066	0.210132	0.206486	0.195132	0.295972	0.22607	0.282788	0.195132	0.270972	0.195132	0.253498	0.172163	0.270972
0.129527	0.186381	0.204429	0.272617	0.149143	0.170829	0.145881	0.187079	0.148242	0.196351	0.134143	0.251617	0.155471	0.236663	0.159891	0.26161	0.133798	0.159891	0.149221	0.212808	0.144742	0.225673	0.127164	0.148492	0.195516	0.240117	0.130914	0.245829	0.144742	0.193145	0.180412	0.235367	0.13883	0.248589	0.176226	0.256559	0.129527	0.184996	0.188492	0.193388	0.163492	0.288589	0.187971	0.274429	0.163492	0.256089	0.163492	0.245829	0.104455	0.222756
0.192179	0.216008	0.227316	0.265634	0.209998	0.210617	0.203325	0.224835	0.192353	0.163145	0.184686	0.242628	0.202837	0.19752	0.211554	0.253585	0.191242	0.211554	0.206587	0.230304	0.203566	0.259106	0.189894	0.197316	0.215148	0.240634	0.183644	0.246085	0.203566	0.227489	0.21395	0.204048	0.211561	0.278273	0.211144	0.208458	0.192179	0.201867	0.197316	0.158423	0.153735	0.239693	0.211587	0.227485	0.153735	0.214693	0.192316	0.207505	0.18354	0.266606
0.138757	0.161925	0.179128	0.231743	0.167279	0.163913	0.156778	0.172351	0.150806	0.211767	0.157904	0.211316	0.157462	0.236455	0.157976	0.21907	0.139695	0.157976	0.156212	0.199226	0.150066	0.201466	0.1403	0.148816	0.170788	0.199243	0.13905	0.216101	0.150066	0.171177	0.173497	0.228214	0.161967	0.229382	0.163738	0.253017	0.138757	0.166413	0.168816	0.193526	0.176964	0.27253	0.179962	0.262276	0.176964	0.24003	0.153816	0.239249	0.139884	0.210216
0.169566	0.179101	0.197554	0.217526	0.199065	0.175686	0.188004	0.18592	0.176198	0.183976	0.192346	0.218492	0.188961	0.208507	0.175998	0.216936	0.16342	0.175998	0.190211	0.198082	0.176148	0.201415	0.168336	0.172398	0.183108	0.200026	0.164586	0.20717	0.176148	0.184186	0.197769	0.202026	0.200002	0.229332	0.182867	0.210486	0.169566	0.181519	0.182398	0.169161	0.164682	0.231616	0.198961	0.222338	0.164682	0.214116	0.172398	0.199454	0.182242	0.231832
0.13584	0.171778	0.191211	0.244381	0.176028	0.163774	0.163305	0.172211	0.16011	0.299066	0.176653	0.238398	0.168989	0.323753	0.152836	0.23893	0.134555	0.152836	0.162739	0.211308	0.147148	0.191881	0.137383	0.150898	0.180649	0.211881	0.141133	0.230961	0.147148	0.168815	0.190024	0.299309	0.165716	0.231465	0.17082	0.338093	0.13584	0.183496	0.190898	0.267399	0.243059	0.348625	0.201489	0.338371	0.243059	0.316125	0.165898	0.308122	0.14141	0.216742
0.173955	0.194623	0.214326	0.243052	0.21081	0.187167	0.198364	0.198104	0.187948	0.18178	0.203935	0.244013	0.201548	0.208967	0.183729	0.242323	0.167948	0.183729	0.200298	0.219423	0.182763	0.21333	0.172998	0.181513	0.199042	0.220552	0.171748	0.231854	0.182763	0.194986	0.215083	0.209615	0.207998	0.24958	0.196435	0.213585	0.173955	0.199111	0.201513	0.172983	0.163365	0.246432	0.219048	0.236178	0.163365	0.223932	0.186513	0.208706	0.18397	0.249302
0.165416	0.229262	0.250435	0.32723	0.204758	0.212056	0.195312	0.224478	0.199339	0.355322	0.20179	0.314498	0.20705	0.389853	0.194244	0.318931	0.168228	0.194244	0.1958	0.272994	0.181529	0.253202	0.165904	0.190279	0.241041	0.28723	0.174654	0.305728	0.181529	0.224359	0.23789	0.369158	0.187571	0.294869	0.22106	0.41204	0.165416	0.240806	0.250279	0.330877	0.29244	0.432029	0.2533	0.418846	0.29244	0.392029	0.215279	0.382889	0.151894	0.268202
0.19812	0.223482	0.258725	0.297721	0.243595	0.218537	0.230307	0.225568	0.231002	0.304177	0.264533	0.318413	0.241538	0.323552	0.205099	0.30588	0.193224	0.205099	0.230288	0.269682	0.204975	0.22911	0.199116	0.213725	0.246505	0.275221	0.207866	0.289318	0.204975	0.221607	0.26312	0.310311	0.230783	0.272026	0.234741	0.329281	0.19812	0.25937	0.273725	0.292603	0.261874	0.355174	0.279038	0.346874	0.261874	0.332674	0.238725	0.312466	0.215679	0.269526
[truncated: 551 more columns]

## Sheet: DR Aa7d GDM
1	600	6	100	100	100	100	100	100	2	300	300
# Loci	2N-Tot	# Pops	GRP1	GRP2	GRP3	BLR4	CAM5	MUR6	# Regs	BNP	VCH
NSW.1	NSW.2	NSW.1	NSW.2	NSW.1	NSW.2	NSW.1	NSW.2	NSW.1	NSW.2	NSW.1	NSW.2	NSW.1	NSW.2	NSW.1	NSW.2	NSW.1	NSW.2	NSW.1	NSW.2	NSW.1	NSW.2	NSW.1	NSW.2	NSW.1	NSW.2	NSW.1	NSW.2	NSW.1	NSW.2	NSW.1	NSW.2	NSW.1	NSW.2	NSW.1	NSW.2	NSW.1	NSW.2	NSW.1	NSW.2	NSW.1	NSW.2	NSW.1	NSW.2	NSW.1	NSW.2	NSW.1	NSW.2	NSW.1	NSW.2
0	0	0	0.0177778	0.04	0.00444444	0.0177778	0.00444444	0.00444444	0	0.04	0	0.0177778	0	0.00444444	0.00444444	0.00444444	0.00444444	0.0177778	0	0	0.04	0	0	0.00444444	0.0177778	0	0.00444444	0	0.0177778	0.0177778	0	0.04	0	0	0.00444444	0	0	0	0.00444444	0	0	0.0177778	0	0	0	0	0.00444444	0.0177778	0.0177778
0	0	0	0.0177778	0.04	0.00444444	0.0177778	0.00444444	0.00444444	0	0.04	0	0.0177778	0	0.00444444	0.00444444	0.00444444	0.00444444	0.0177778	0	0	0.04	0	0	0.00444444	0.0177778	0	0.00444444	0	0.0177778	0.0177778	0	0.04	0	0	0.00444444	0	0	0	0.00444444	0	0	0.0177778	0	0	0	0	0.00444444	0.0177778	0.0177778
0	0	0	0.0177778	0.04	0.00444444	0.0177778	0.00444444	0.00444444	0	0.04	0	0.0177778	0	0.00444444	0.00444444	0.00444444	0.00444444	0.0177778	0	0	0.04	0	0	0.00444444	0.0177778	0	0.00444444	0	0.0177778	0.0177778	0	0.04	0	0	0.00444444	0	0	0	0.00444444	0	0	0.0177778	0	0	0	0	0.00444444	0.0177778	0.0177778
0.0177778	0.0177778	0.0177778	0	0.111111	0.00444444	0.0711111	0.00444444	0.04	0.0177778	0.111111	0.0177778	0.0711111	0.0177778	0.00444444	0.00444444	0.00444444	0.00444444	0.0711111	0.0177778	0.0177778	0.00444444	0.0177778	0.0177778	0.00444444	0	0.0177778	0.00444444	0.0177778	0	0.0711111	0.0177778	0.111111	0.0177778	0.0177778	0.00444444	0.0177778	0.0177778	0.0177778	0.00444444	0.0177778	0.0177778	0.0711111	0.0177778	0.0177778	0.0177778	0.0177778	0.00444444	0.0711111	0.0711111
0.04	0.04	0.04	0.111111	0	0.0711111	0.00444444	0.0711111	0.0177778	0.04	0	0.04	0.00444444	0.04	0.0711111	0.0711111	0.0711111	0.0711111	0.00444444	0.04	0.04	0.16	0.04	0.04	0.0711111	0.111111	0.04	0.0711111	0.04	0.111111	0.00444444	0.04	0	0.04	0.04	0.0711111	0.04	0.04	0.04	0.0711111	0.04	0.04	0.00444444	0.04	0.04	0.04	0.04	0.0711111	0.00444444	0.00444444
0.00444444	0.00444444	0.00444444	0.00444444	0.0711111	0	0.04	0	0.0177778	0.00444444	0.0711111	0.00444444	0.04	0.00444444	0	0	0	0	0.04	0.00444444	0.00444444	0.0177778	0.00444444	0.00444444	0	0.00444444	0.00444444	0	0.00444444	0.00444444	0.04	0.00444444	0.0711111	0.00444444	0.00444444	0	0.00444444	0.00444444	0.00444444	0	0.00444444	0.00444444	0.04	0.00444444	0.00444444	0.00444444	0.00444444	0	0.04	0.04
0.0177778	0.0177778	0.0177778	0.0711111	0.00444444	0.04	0	0.04	0.00444444	0.0177778	0.00444444	0.0177778	0	0.0177778	0.04	0.04	0.04	0.04	0	0.0177778	0.0177778	0.111111	0.0177778	0.0177778	0.04	0.0711111	0.0177778	0.04	0.0177778	0.0711111	0	0.0177778	0.00444444	0.0177778	0.0177778	0.04	0.0177778	0.0177778	0.0177778	0.04	0.0177778	0.0177778	0	0.0177778	0.0177778	0.0177778	0.0177778	0.04	0	0
0.00444444	0.00444444	0.00444444	0.00444444	0.0711111	0	0.04	0	0.0177778	0.00444444	0.0711111	0.00444444	0.04	0.00444444	0	0	0	0	0.04	0.00444444	0.00444444	0.0177778	0.00444444	0.00444444	0	0.00444444	0.00444444	0	0.00444444	0.00444444	0.04	0.00444444	0.0711111	0.00444444	0.00444444	0	0.00444444	0.00444444	0.00444444	0	0.00444444	0.00444444	0.04	0.00444444	0.00444444	0.00444444	0.00444444	0	0.04	0.04
0.00444444	0.00444444	0.00444444	0.04	0.0177778	0.0177778	0.00444444	0.0177778	0	0.00444444	0.0177778	0.00444444	0.00444444	0.00444444	0.0177778	0.0177778	0.0177778	0.0177778	0.00444444	0.00444444	0.00444444	0.0711111	0.00444444	0.00444444	0.0177778	0.04	0.00444444	0.0177778	0.00444444	0.04	0.00444444	0.00444444	0.0177778	0.00444444	0.00444444	0.0177778	0.00444444	0.00444444	0.00444444	0.0177778	0.00444444	0.00444444	0.00444444	0.00444444	0.00444444	0.00444444	0.00444444	0.0177778	0.00444444	0.00444444
0	0	0	0.0177778	0.04	0.00444444	0.0177778	0.00444444	0.00444444	0	0.04	0	0.0177778	0	0.00444444	0.00444444	0.00444444	0.00444444	0.0177778	0	0	0.04	0	0	0.00444444	0.0177778	0	0.00444444	0	0.0177778	0.0177778	0	0.04	0	0	0.00444444	0	0	0	0.00444444	0	0	0.0177778	0	0	0	0	0.00444444	0.0177778	0.0177778
0.04	0.04	0.04	0.111111	0	0.0711111	0.00444444	0.0711111	0.0177778	0.04	0	0.04	0.00444444	0.04	0.0711111	0.0711111	0.0711111	0.0711111	0.00444444	0.04	0.04	0.16	0.04	0.04	0.0711111	0.111111	0.04	0.0711111	0.04	0.111111	0.00444444	0.04	0	0.04	0.04	0.0711111	0.04	0.04	0.04	0.0711111	0.04	0.04	0.00444444	0.04	0.04	0.04	0.04	0.0711111	0.00444444	0.00444444
0	0	0	0.0177778	0.04	0.00444444	0.0177778	0.00444444	0.00444444	0	0.04	0	0.0177778	0	0.00444444	0.00444444	0.00444444	0.00444444	0.0177778	0	0	0.04	0	0	0.00444444	0.0177778	0	0.00444444	0	0.0177778	0.0177778	0	0.04	0	0	0.00444444	0	0	0	0.00444444	0	0	0.0177778	0	0	0	0	0.00444444	0.0177778	0.0177778
0.0177778	0.0177778	0.0177778	0.0711111	0.00444444	0.04	0	0.04	0.00444444	0.0177778	0.00444444	0.0177778	0	0.0177778	0.04	0.04	0.04	0.04	0	0.0177778	0.0177778	0.111111	0.0177778	0.0177778	0.04	0.0711111	0.0177778	0.04	0.0177778	0.0711111	0	0.0177778	0.00444444	0.0177778	0.0177778	0.04	0.0177778	0.0177778	0.0177778	0.04	0.0177778	0.0177778	0	0.0177778	0.0177778	0.0177778	0.0177778	0.04	0	0
0	0	0	0.0177778	0.04	0.00444444	0.0177778	0.00444444	0.00444444	0	0.04	0	0.0177778	0	0.00444444	0.00444444	0.00444444	0.00444444	0.0177778	0	0	0.04	0	0	0.00444444	0.0177778	0	0.00444444	0	0.0177778	0.0177778	0	0.04	0	0	0.00444444	0	0	0	0.00444444	0	0	0.0177778	0	0	0	0	0.00444444	0.0177778	0.0177778
0.00444444	0.00444444	0.00444444	0.00444444	0.0711111	0	0.04	0	0.0177778	0.00444444	0.0711111	0.00444444	0.04	0.00444444	0	0	0	0	0.04	0.00444444	0.00444444	0.0177778	0.00444444	0.00444444	0	0.00444444	0.00444444	0	0.00444444	0.00444444	0.04	0.00444444	0.0711111	0.00444444	0.00444444	0	0.00444444	0.00444444	0.00444444	0	0.00444444	0.00444444	0.04	0.00444444	0.00444444	0.00444444	0.00444444	0	0.04	0.04
0.00444444	0.00444444	0.00444444	0.00444444	0.0711111	0	0.04	0	0.0177778	0.00444444	0.0711111	0.00444444	0.04	0.00444444	0	0	0	0	0.04	0.00444444	0.00444444	0.0177778	0.00444444	0.00444444	0	0.00444444	0.00444444	0	0.00444444	0.00444444	0.04	0.00444444	0.0711111	0.00444444	0.00444444	0	0.00444444	0.00444444	0.00444444	0	0.00444444	0.00444444	0.04	0.00444444	0.00444444	0.00444444	0.00444444	0	0.04	0.04
0.00444444	0.00444444	0.00444444	0.00444444	0.0711111	0	0.04	0	0.0177778	0.00444444	0.0711111	0.00444444	0.04	0.00444444	0	0	0	0	0.04	0.00444444	0.00444444	0.0177778	0.00444444	0.00444444	0	0.00444444	0.00444444	0	0.00444444	0.00444444	0.04	0.00444444	0.0711111	0.00444444	0.00444444	0	0.00444444	0.00444444	0.00444444	0	0.00444444	0.00444444	0.04	0.00444444	0.00444444	0.00444444	0.00444444	0	0.04	0.04
0.00444444	0.00444444	0.00444444	0.00444444	0.0711111	0	0.04	0	0.0177778	0.00444444	0.0711111	0.00444444	0.04	0.00444444	0	0	0	0	0.04	0.00444444	0.00444444	0.0177778	0.00444444	0.00444444	0	0.00444444	0.00444444	0	0.00444444	0.00444444	0.04	0.00444444	0.0711111	0.00444444	0.00444444	0	0.00444444	0.00444444	0.00444444	0	0.00444444	0.00444444	0.04	0.00444444	0.00444444	0.00444444	0.00444444	0	0.04	0.04
0.0177778	0.0177778	0.0177778	0.0711111	0.00444444	0.04	0	0.04	0.00444444	0.0177778	0.00444444	0.0177778	0	0.0177778	0.04	0.04	0.04	0.04	0	0.0177778	0.0177778	0.111111	0.0177778	0.0177778	0.04	0.0711111	0.0177778	0.04	0.0177778	0.0711111	0	0.0177778	0.00444444	0.0177778	0.0177778	0.04	0.0177778	0.0177778	0.0177778	0.04	0.0177778	0.0177778	0	0.0177778	0.0177778	0.0177778	0.0177778	0.04	0	0
0	0	0	0.0177778	0.04	0.00444444	0.0177778	0.00444444	0.00444444	0	0.04	0	0.0177778	0	0.00444444	0.00444444	0.00444444	0.00444444	0.0177778	0	0	0.04	0	0	0.00444444	0.0177778	0	0.00444444	0	0.0177778	0.0177778	0	0.04	0	0	0.00444444	0	0	0	0.00444444	0	0	0.0177778	0	0	0	0	0.00444444	0.0177778	0.0177778
0	0	0	0.0177778	0.04	0.00444444	0.0177778	0.00444444	0.00444444	0	0.04	0	0.0177778	0	0.00444444	0.00444444	0.00444444	0.00444444	0.0177778	0	0	0.04	0	0	0.00444444	0.0177778	0	0.00444444	0	0.0177778	0.0177778	0	0.04	0	0	0.00444444	0	0	0	0.00444444	0	0	0.0177778	0	0	0	0	0.00444444	0.0177778	0.0177778
0.04	0.04	0.04	0.00444444	0.16	0.0177778	0.111111	0.0177778	0.0711111	0.04	0.16	0.04	0.111111	0.04	0.0177778	0.0177778	0.0177778	0.0177778	0.111111	0.04	0.04	0	0.04	0.04	0.0177778	0.00444444	0.04	0.0177778	0.04	0.00444444	0.111111	0.04	0.16	0.04	0.04	0.0177778	0.04	0.04	0.04	0.0177778	0.04	0.04	0.111111	0.04	0.04	0.04	0.04	0.0177778	0.111111	0.111111
0	0	0	0.0177778	0.04	0.00444444	0.0177778	0.00444444	0.00444444	0	0.04	0	0.0177778	0	0.00444444	0.00444444	0.00444444	0.00444444	0.0177778	0	0	0.04	0	0	0.00444444	0.0177778	0	0.00444444	0	0.0177778	0.0177778	0	0.04	0	0	0.00444444	0	0	0	0.00444444	0	0	0.0177778	0	0	0	0	0.00444444	0.0177778	0.0177778
0	0	0	0.0177778	0.04	0.00444444	0.0177778	0.00444444	0.00444444	0	0.04	0	0.0177778	0	0.00444444	0.00444444	0.00444444	0.00444444	0.0177778	0	0	0.04	0	0	0.00444444	0.0177778	0	0.00444444	0	0.0177778	0.0177778	0	0.04	0	0	0.00444444	0	0	0	0.00444444	0	0	0.0177778	0	0	0	0	0.00444444	0.0177778	0.0177778
0.00444444	0.00444444	0.00444444	0.00444444	0.0711111	0	0.04	0	0.0177778	0.00444444	0.0711111	0.00444444	0.04	0.00444444	0	0	0	0	0.04	0.00444444	0.00444444	0.0177778	0.00444444	0.00444444	0	0.00444444	0.00444444	0	0.00444444	0.00444444	0.04	0.00444444	0.0711111	0.00444444	0.00444444	0	0.00444444	0.00444444	0.00444444	0	0.00444444	0.00444444	0.04	0.00444444	0.00444444	0.00444444	0.00444444	0	0.04	0.04
0.0177778	0.0177778	0.0177778	0	0.111111	0.00444444	0.0711111	0.00444444	0.04	0.0177778	0.111111	0.0177778	0.0711111	0.0177778	0.00444444	0.00444444	0.00444444	0.00444444	0.0711111	0.0177778	0.0177778	0.00444444	0.0177778	0.0177778	0.00444444	0	0.0177778	0.00444444	0.0177778	0	0.0711111	0.0177778	0.111111	0.0177778	0.0177778	0.00444444	0.0177778	0.0177778	0.0177778	0.00444444	0.0177778	0.0177778	0.0711111	0.0177778	0.0177778	0.0177778	0.0177778	0.00444444	0.0711111	0.0711111
0	0	0	0.0177778	0.04	0.00444444	0.0177778	0.00444444	0.00444444	0	0.04	0	0.0177778	0	0.00444444	0.00444444	0.00444444	0.00444444	0.0177778	0	0	0.04	0	0	0.00444444	0.0177778	0	0.00444444	0	0.0177778	0.0177778	0	0.04	0	0	0.00444444	0	0	0	0.00444444	0	0	0.0177778	0	0	0	0	0.00444444	0.0177778	0.0177778
0.00444444	0.00444444	0.00444444	0.00444444	0.0711111	0	0.04	0	0.0177778	0.00444444	0.0711111	0.00444444	0.04	0.00444444	0	0	0	0	0.04	0.00444444	0.00444444	0.0177778	0.00444444	0.00444444	0	0.00444444	0.00444444	0	0.00444444	0.00444444	0.04	0.00444444	0.0711111	0.00444444	0.00444444	0	0.00444444	0.00444444	0.00444444	0	0.00444444	0.00444444	0.04	0.00444444	0.00444444	0.00444444	0.00444444	0	0.04	0.04
0	0	0	0.0177778	0.04	0.00444444	0.0177778	0.00444444	0.00444444	0	0.04	0	0.0177778	0	0.00444444	0.00444444	0.00444444	0.00444444	0.0177778	0	0	0.04	0	0	0.00444444	0.0177778	0	0.00444444	0	0.0177778	0.0177778	0	0.04	0	0	0.00444444	0	0	0	0.00444444	0	0	0.0177778	0	0	0	0	0.00444444	0.0177778	0.0177778
0.0177778	0.0177778	0.0177778	0	0.111111	0.00444444	0.0711111	0.00444444	0.04	0.0177778	0.111111	0.0177778	0.0711111	0.0177778	0.00444444	0.00444444	0.00444444	0.00444444	0.0711111	0.0177778	0.0177778	0.00444444	0.0177778	0.0177778	0.00444444	0	0.0177778	0.00444444	0.0177778	0	0.0711111	0.0177778	0.111111	0.0177778	0.0177778	0.00444444	0.0177778	0.0177778	0.0177778	0.00444444	0.0177778	0.0177778	0.0711111	0.0177778	0.0177778	0.0177778	0.0177778	0.00444444	0.0711111	0.0711111
0.0177778	0.0177778	0.0177778	0.0711111	0.00444444	0.04	0	0.04	0.00444444	0.0177778	0.00444444	0.0177778	0	0.0177778	0.04	0.04	0.04	0.04	0	0.0177778	0.0177778	0.111111	0.0177778	0.0177778	0.04	0.0711111	0.0177778	0.04	0.0177778	0.0711111	0	0.0177778	0.00444444	0.0177778	0.0177778	0.04	0.0177778	0.0177778	0.0177778	0.04	0.0177778	0.0177778	0	0.0177778	0.0177778	0.0177778	0.0177778	0.04	0	0
0	0	0	0.0177778	0.04	0.00444444	0.0177778	0.00444444	0.00444444	0	0.04	0	0.0177778	0	0.00444444	0.00444444	0.00444444	0.00444444	0.0177778	0	0	0.04	0	0	0.00444444	0.0177778	0	0.00444444	0	0.0177778	0.0177778	0	0.04	0	0	0.00444444	0	0	0	0.00444444	0	0	0.0177778	0	0	0	0	0.00444444	0.0177778	0.0177778
0.04	0.04	0.04	0.111111	0	0.0711111	0.00444444	0.0711111	0.0177778	0.04	0	0.04	0.00444444	0.04	0.0711111	0.0711111	0.0711111	0.0711111	0.00444444	0.04	0.04	0.16	0.04	0.04	0.0711111	0.111111	0.04	0.0711111	0.04	0.111111	0.00444444	0.04	0	0.04	0.04	0.0711111	0.04	0.04	0.04	0.0711111	0.04	0.04	0.00444444	0.04	0.04	0.04	0.04	0.0711111	0.00444444	0.00444444
0	0	0	0.0177778	0.04	0.00444444	0.0177778	0.00444444	0.00444444	0	0.04	0	0.0177778	0	0.00444444	0.00444444	0.00444444	0.00444444	0.0177778	0	0	0.04	0	0	0.00444444	0.0177778	0	0.00444444	0	0.0177778	0.0177778	0	0.04	0	0	0.00444444	0	0	0	0.00444444	0	0	0.0177778	0	0	0	0	0.00444444	0.0177778	0.0177778
0	0	0	0.0177778	0.04	0.00444444	0.0177778	0.00444444	0.00444444	0	0.04	0	0.0177778	0	0.00444444	0.00444444	0.00444444	0.00444444	0.0177778	0	0	0.04	0	0	0.00444444	0.0177778	0	0.00444444	0	0.0177778	0.0177778	0	0.04	0	0	0.00444444	0	0	0	0.00444444	0	0	0.0177778	0	0	0	0	0.00444444	0.0177778	0.0177778
0.00444444	0.00444444	0.00444444	0.00444444	0.0711111	0	0.04	0	0.0177778	0.00444444	0.0711111	0.00444444	0.04	0.00444444	0	0	0	0	0.04	0.00444444	0.00444444	0.0177778	0.00444444	0.00444444	0	0.00444444	0.00444444	0	0.00444444	0.00444444	0.04	0.00444444	0.0711111	0.00444444	0.00444444	0	0.00444444	0.00444444	0.00444444	0	0.00444444	0.00444444	0.04	0.00444444	0.00444444	0.00444444	0.00444444	0	0.04	0.04
0	0	0	0.0177778	0.04	0.00444444	0.0177778	0.00444444	0.00444444	0	0.04	0	0.0177778	0	0.00444444	0.00444444	0.00444444	0.00444444	0.0177778	0	0	0.04	0	0	0.00444444	0.0177778	0	0.00444444	0	0.0177778	0.0177778	0	0.04	0	0	0.00444444	0	0	0	0.00444444	0	0	0.0177778	0	0	0	0	0.00444444	0.0177778	0.0177778
0	0	0	0.0177778	0.04	0.00444444	0.0177778	0.00444444	0.00444444	0	0.04	0	0.0177778	0	0.00444444	0.00444444	0.00444444	0.00444444	0.0177778	0	0	0.04	0	0	0.00444444	0.0177778	0	0.00444444	0	0.0177778	0.0177778	0	0.04	0	0	0.00444444	0	0	0	0.00444444	0	0	0.0177778	0	0	0	0	0.00444444	0.0177778	0.0177778
0	0	0	0.0177778	0.04	0.00444444	0.0177778	0.00444444	0.00444444	0	0.04	0	0.0177778	0	0.00444444	0.00444444	0.00444444	0.00444444	0.0177778	0	0	0.04	0	0	0.00444444	0.0177778	0	0.00444444	0	0.0177778	0.0177778	0	0.04	0	0	0.00444444	0	0	0	0.00444444	0	0	0.0177778	0	0	0	0	0.00444444	0.0177778	0.0177778
0.00444444	0.00444444	0.00444444	0.00444444	0.0711111	0	0.04	0	0.0177778	0.00444444	0.0711111	0.00444444	0.04	0.00444444	0	0	0	0	0.04	0.00444444	0.00444444	0.0177778	0.00444444	0.00444444	0	0.00444444	0.00444444	0	0.00444444	0.00444444	0.04	0.00444444	0.0711111	0.00444444	0.00444444	0	0.00444444	0.00444444	0.00444444	0	0.00444444	0.00444444	0.04	0.00444444	0.00444444	0.00444444	0.00444444	0	0.04	0.04
0	0	0	0.0177778	0.04	0.00444444	0.0177778	0.00444444	0.00444444	0	0.04	0	0.0177778	0	0.00444444	0.00444444	0.00444444	0.00444444	0.0177778	0	0	0.04	0	0	0.00444444	0.0177778	0	0.00444444	0	0.0177778	0.0177778	0	0.04	0	0	0.00444444	0	0	0	0.00444444	0	0	0.0177778	0	0	0	0	0.00444444	0.0177778	0.0177778
0	0	0	0.0177778	0.04	0.00444444	0.0177778	0.00444444	0.00444444	0	0.04	0	0.0177778	0	0.00444444	0.00444444	0.00444444	0.00444444	0.0177778	0	0	0.04	0	0	0.00444444	0.0177778	0	0.00444444	0	0.0177778	0.0177778	0	0.04	0	0	0.00444444	0	0	0	0.00444444	0	0	0.0177778	0	0	0	0	0.00444444	0.0177778	0.0177778
0.0177778	0.0177778	0.0177778	0.0711111	0.00444444	0.04	0	0.04	0.00444444	0.0177778	0.00444444	0.0177778	0	0.0177778	0.04	0.04	0.04	0.04	0	0.0177778	0.0177778	0.111111	0.0177778	0.0177778	0.04	0.0711111	0.0177778	0.04	0.0177778	0.0711111	0	0.0177778	0.00444444	0.0177778	0.0177778	0.04	0.0177778	0.0177778	0.0177778	0.04	0.0177778	0.0177778	0	0.0177778	0.0177778	0.0177778	0.0177778	0.04	0	0
0	0	0	0.0177778	0.04	0.00444444	0.0177778	0.00444444	0.00444444	0	0.04	0	0.0177778	0	0.00444444	0.00444444	0.00444444	0.00444444	0.0177778	0	0	0.04	0	0	0.00444444	0.0177778	0	0.00444444	0	0.0177778	0.0177778	0	0.04	0	0	0.00444444	0	0	0	0.00444444	0	0	0.0177778	0	0	0	0	0.00444444	0.0177778	0.0177778
0	0	0	0.0177778	0.04	0.00444444	0.0177778	0.00444444	0.00444444	0	0.04	0	0.0177778	0	0.00444444	0.00444444	0.00444444	0.00444444	0.0177778	0	0	0.04	0	0	0.00444444	0.0177778	0	0.00444444	0	0.0177778	0.0177778	0	0.04	0	0	0.00444444	0	0	0	0.00444444	0	0	0.0177778	0	0	0	0	0.00444444	0.0177778	0.0177778
0	0	0	0.0177778	0.04	0.00444444	0.0177778	0.00444444	0.00444444	0	0.04	0	0.0177778	0	0.00444444	0.00444444	0.00444444	0.00444444	0.0177778	0	0	0.04	0	0	0.00444444	0.0177778	0	0.00444444	0	0.0177778	0.0177778	0	0.04	0	0	0.00444444	0	0	0	0.00444444	0	0	0.0177778	0	0	0	0	0.00444444	0.0177778	0.0177778
0	0	0	0.0177778	0.04	0.00444444	0.0177778	0.00444444	0.00444444	0	0.04	0	0.0177778	0	0.00444444	0.00444444	0.00444444	0.00444444	0.0177778	0	0	0.04	0	0	0.00444444	0.0177778	0	0.00444444	0	0.0177778	0.0177778	0	0.04	0	0	0.00444444	0	0	0	0.00444444	0	0	0.0177778	0	0	0	0	0.00444444	0.0177778	0.0177778
0.00444444	0.00444444	0.00444444	0.00444444	0.0711111	0	0.04	0	0.0177778	0.00444444	0.0711111	0.00444444	0.04	0.00444444	0	0	0	0	0.04	0.00444444	0.00444444	0.0177778	0.00444444	0.00444444	0	0.00444444	0.00444444	0	0.00444444	0.00444444	0.04	0.00444444	0.0711111	0.00444444	0.00444444	0	0.00444444	0.00444444	0.00444444	0	0.00444444	0.00444444	0.04	0.00444444	0.00444444	0.00444444	0.00444444	0	0.04	0.04
0.0177778	0.0177778	0.0177778	0.0711111	0.00444444	0.04	0	0.04	0.00444444	0.0177778	0.00444444	0.0177778	0	0.0177778	0.04	0.04	0.04	0.04	0	0.0177778	0.0177778	0.111111	0.0177778	0.0177778	0.04	0.0711111	0.0177778	0.04	0.0177778	0.0711111	0	0.0177778	0.00444444	0.0177778	0.0177778	0.04	0.0177778	0.0177778	0.0177778	0.04	0.0177778	0.0177778	0	0.0177778	0.0177778	0.0177778	0.0177778	0.04	0	0
0.0177778	0.0177778	0.0177778	0.0711111	0.00444444	0.04	0	0.04	0.00444444	0.0177778	0.00444444	0.0177778	0	0.0177778	0.04	0.04	0.04	0.04	0	0.0177778	0.0177778	0.111111	0.0177778	0.0177778	0.04	0.0711111	0.0177778	0.04	0.0177778	0.0711111	0	0.0177778	0.00444444	0.0177778	0.0177778	0.04	0.0177778	0.0177778	0.0177778	0.04	0.0177778	0.0177778	0	0.0177778	0.0177778	0.0177778	0.0177778	0.04	0	0
0	0	0	0.0177778	0.04	0.00444444	0.0177778	0.00444444	0.00444444	0	0.04	0	0.0177778	0	0.00444444	0.00444444	0.00444444	0.00444444	0.0177778	0	0	0.04	0	0	0.00444444	0.0177778	0	0.00444444	0	0.0177778	0.0177778	0	0.04	0	0	0.00444444	0	0	0	0.00444444	0	0	0.0177778	0	0	0	0	0.00444444	0.0177778	0.0177778
0	0	0	0.0177778	0.04	0.00444444	0.0177778	0.00444444	0.00444444	0	0.04	0	0.0177778	0	0.00444444	0.00444444	0.00444444	0.00444444	0.0177778	0	0	0.04	0	0	0.00444444	0.0177778	0	0.00444444	0	0.0177778	0.0177778	0	0.04	0	0	0.00444444	0	0	0	0.00444444	0	0	0.0177778	0	0	0	0	0.00444444	0.0177778	0.0177778
0.04	0.04	0.04	0.111111	0	0.0711111	0.00444444	0.0711111	0.0177778	0.04	0	0.04	0.00444444	0.04	0.0711111	0.0711111	0.0711111	0.0711111	0.00444444	0.04	0.04	0.16	0.04	0.04	0.0711111	0.111111	0.04	0.0711111	0.04	0.111111	0.00444444	0.04	0	0.04	0.04	0.0711111	0.04	0.04	0.04	0.0711111	0.04	0.04	0.00444444	0.04	0.04	0.04	0.04	0.0711111	0.00444444	0.00444444
0.00444444	0.00444444	0.00444444	0.00444444	0.0711111	0	0.04	0	0.0177778	0.00444444	0.0711111	0.00444444	0.04	0.00444444	0	0	0	0	0.04	0.00444444	0.00444444	0.0177778	0.00444444	0.00444444	0	0.00444444	0.00444444	0	0.00444444	0.00444444	0.04	0.00444444	0.0711111	0.00444444	0.00444444	0	0.00444444	0.00444444	0.00444444	0	0.00444444	0.00444444	0.04	0.00444444	0.00444444	0.00444444	0.00444444	0	0.04	0.04
0	0	0	0.0177778	0.04	0.00444444	0.0177778	0.00444444	0.00444444	0	0.04	0	0.0177778	0	0.00444444	0.00444444	0.00444444	0.00444444	0.0177778	0	0	0.04	0	0	0.00444444	0.0177778	0	0.00444444	0	0.0177778	0.0177778	0	0.04	0	0	0.00444444	0	0	0	0.00444444	0	0	0.0177778	0	0	0	0	0.00444444	0.0177778	0.0177778
0	0	0	0.0177778	0.04	0.00444444	0.0177778	0.00444444	0.00444444	0	0.04	0	0.0177778	0	0.00444444	0.00444444	0.00444444	0.00444444	0.0177778	0	0	0.04	0	0	0.00444444	0.0177778	0	0.00444444	0	0.0177778	0.0177778	0	0.04	0	0	0.00444444	0	0	0	0.00444444	0	0	0.0177778	0	0	0	0	0.00444444	0.0177778	0.0177778
0.0177778	0.0177778	0.0177778	0.0711111	0.00444444	0.04	0	0.04	0.00444444	0.0177778	0.00444444	0.0177778	0	0.0177778	0.04	0.04	0.04	0.04	0	0.0177778	0.0177778	0.111111	0.0177778	0.0177778	0.04	0.0711111	0.0177778	0.04	0.0177778	0.0711111	0	0.0177778	0.00444444	0.0177778	0.0177778	0.04	0.0177778	0.0177778	0.0177778	0.04	0.0177778	0.0177778	0	0.0177778	0.0177778	0.0177778	0.0177778	0.04	0	0
0	0	0	0.0177778	0.04	0.00444444	0.0177778	0.00444444	0.00444444	0	0.04	0	0.0177778	0	0.00444444	0.00444444	0.00444444	0.00444444	0.0177778	0	0	0.04	0	0	0.00444444	0.0177778	0	0.00444444	0	0.0177778	0.0177778	0	0.04	0	0	0.00444444	0	0	0	0.00444444	0	0	0.0177778	0	0	0	0	0.00444444	0.0177778	0.0177778
0.04	0.04	0.04	0.111111	0	0.0711111	0.00444444	0.0711111	0.0177778	0.04	0	0.04	0.00444444	0.04	0.0711111	0.0711111	0.0711111	0.0711111	0.00444444	0.04	0.04	0.16	0.04	0.04	0.0711111	0.111111	0.04	0.0711111	0.04	0.111111	0.00444444	0.04	0	0.04	0.04	0.0711111	0.04	0.04	0.04	0.0711111	0.04	0.04	0.00444444	0.04	0.04	0.04	0.04	0.0711111	0.00444444	0.00444444
0	0	0	0.0177778	0.04	0.00444444	0.0177778	0.00444444	0.00444444	0	0.04	0	0.0177778	0	0.00444444	0.00444444	0.00444444	0.00444444	0.0177778	0	0	0.04	0	0	0.00444444	0.0177778	0	0.00444444	0	0.0177778	0.0177778	0	0.04	0	0	0.00444444	0	0	0	0.00444444	0	0	0.0177778	0	0	0	0	0.00444444	0.0177778	0.0177778
0	0	0	0.0177778	0.04	0.00444444	0.0177778	0.00444444	0.00444444	0	0.04	0	0.0177778	0	0.00444444	0.00444444	0.00444444	0.00444444	0.0177778	0	0	0.04	0	0	0.00444444	0.0177778	0	0.00444444	0	0.0177778	0.0177778	0	0.04	0	0	0.00444444	0	0	0	0.00444444	0	0	0.0177778	0	0	0	0	0.00444444	0.0177778	0.0177778
0	0	0	0.0177778	0.04	0.00444444	0.0177778	0.00444444	0.00444444	0	0.04	0	0.0177778	0	0.00444444	0.00444444	0.00444444	0.00444444	0.0177778	0	0	0.04	0	0	0.00444444	0.0177778	0	0.00444444	0	0.0177778	0.0177778	0	0.04	0	0	0.00444444	0	0	0	0.00444444	0	0	0.0177778	0	0	0	0	0.00444444	0.0177778	0.0177778
0.0177778	0.0177778	0.0177778	0.0711111	0.00444444	0.04	0	0.04	0.00444444	0.0177778	0.00444444	0.0177778	0	0.0177778	0.04	0.04	0.04	0.04	0	0.0177778	0.0177778	0.111111	0.0177778	0.0177778	0.04	0.0711111	0.0177778	0.04	0.0177778	0.0711111	0	0.0177778	0.00444444	0.0177778	0.0177778	0.04	0.0177778	0.0177778	0.0177778	0.04	0.0177778	0.0177778	0	0.0177778	0.0177778	0.0177778	0.0177778	0.04	0	0
0.00444444	0.00444444	0.00444444	0.00444444	0.0711111	0	0.04	0	0.0177778	0.00444444	0.0711111	0.00444444	0.04	0.00444444	0	0	0	0	0.04	0.00444444	0.00444444	0.0177778	0.00444444	0.00444444	0	0.00444444	0.00444444	0	0.00444444	0.00444444	0.04	0.00444444	0.0711111	0.00444444	0.00444444	0	0.00444444	0.00444444	0.00444444	0	0.00444444	0.00444444	0.04	0.00444444	0.00444444	0.00444444	0.00444444	0	0.04	0.04
0	0	0	0.0177778	0.04	0.00444444	0.0177778	0.00444444	0.00444444	0	0.04	0	0.0177778	0	0.00444444	0.00444444	0.00444444	0.00444444	0.0177778	0	0	0.04	0	0	0.00444444	0.0177778	0	0.00444444	0	0.0177778	0.0177778	0	0.04	0	0	0.00444444	0	0	0	0.00444444	0	0	0.0177778	0	0	0	0	0.00444444	0.0177778	0.0177778
0	0	0	0.0177778	0.04	0.00444444	0.0177778	0.00444444	0.00444444	0	0.04	0	0.0177778	0	0.00444444	0.00444444	0.00444444	0.00444444	0.0177778	0	0	0.04	0	0	0.00444444	0.0177778	0	0.00444444	0	0.0177778	0.0177778	0	0.04	0	0	0.00444444	0	0	0	0.00444444	0	0	0.0177778	0	0	0	0	0.00444444	0.0177778	0.0177778
0	0	0	0.0177778	0.04	0.00444444	0.0177778	0.00444444	0.00444444	0	0.04	0	0.0177778	0	0.00444444	0.00444444	0.00444444	0.00444444	0.0177778	0	0	0.04	0	0	0.00444444	0.0177778	0	0.00444444	0	0.0177778	0.0177778	0	0.04	0	0	0.00444444	0	0	0	0.00444444	0	0	0.0177778	0	0	0	0	0.00444444	0.0177778	0.0177778
0.00444444	0.00444444	0.00444444	0.00444444	0.0711111	0	0.04	0	0.0177778	0.00444444	0.0711111	0.00444444	0.04	0.00444444	0	0	0	0	0.04	0.00444444	0.00444444	0.0177778	0.00444444	0.00444444	0	0.00444444	0.00444444	0	0.00444444	0.00444444	0.04	0.00444444	0.0711111	0.00444444	0.00444444	0	0.00444444	0.00444444	0.00444444	0	0.00444444	0.00444444	0.04	0.00444444	0.00444444	0.00444444	0.00444444	0	0.04	0.04
0	0	0	0.0177778	0.04	0.00444444	0.0177778	0.00444444	0.00444444	0	0.04	0	0.0177778	0	0.00444444	0.00444444	0.00444444	0.00444444	0.0177778	0	0	0.04	0	0	0.00444444	0.0177778	0	0.00444444	0	0.0177778	0.0177778	0	0.04	0	0	0.00444444	0	0	0	0.00444444	0	0	0.0177778	0	0	0	0	0.00444444	0.0177778	0.0177778
0	0	0	0.0177778	0.04	0.00444444	0.0177778	0.00444444	0.00444444	0	0.04	0	0.0177778	0	0.00444444	0.00444444	0.00444444	0.00444444	0.0177778	0	0	0.04	0	0	0.00444444	0.0177778	0	0.00444444	0	0.0177778	0.0177778	0	0.04	0	0	0.00444444	0	0	0	0.00444444	0	0	0.0177778	0	0	0	0	0.00444444	0.0177778	0.0177778
0.0177778	0.0177778	0.0177778	0.0711111	0.00444444	0.04	0	0.04	0.00444444	0.0177778	0.00444444	0.0177778	0	0.0177778	0.04	0.04	0.04	0.04	0	0.0177778	0.0177778	0.111111	0.0177778	0.0177778	0.04	0.0711111	0.0177778	0.04	0.0177778	0.0711111	0	0.0177778	0.00444444	0.0177778	0.0177778	0.04	0.0177778	0.0177778	0.0177778	0.04	0.0177778	0.0177778	0	0.0177778	0.0177778	0.0177778	0.0177778	0.04	0	0
0.00444444	0.00444444	0.00444444	0.00444444	0.0711111	0	0.04	0	0.0177778	0.00444444	0.0711111	0.00444444	0.04	0.00444444	0	0	0	0	0.04	0.00444444	0.00444444	0.0177778	0.00444444	0.00444444	0	0.00444444	0.00444444	0	0.00444444	0.00444444	0.04	0.00444444	0.0711111	0.00444444	0.00444444	0	0.00444444	0.00444444	0.00444444	0	0.00444444	0.00444444	0.04	0.00444444	0.00444444	0.00444444	0.00444444	0	0.04	0.04
0	0	0	0.0177778	0.04	0.00444444	0.0177778	0.00444444	0.00444444	0	0.04	0	0.0177778	0	0.00444444	0.00444444	0.00444444	0.00444444	0.0177778	0	0	0.04	0	0	0.00444444	0.0177778	0	0.00444444	0	0.0177778	0.0177778	0	0.04	0	0	0.00444444	0	0	0	0.00444444	0	0	0.0177778	0	0	0	0	0.00444444	0.0177778	0.0177778
0.04	0.04	0.04	0.00444444	0.16	0.0177778	0.111111	0.0177778	0.0711111	0.04	0.16	0.04	0.111111	0.04	0.0177778	0.0177778	0.0177778	0.0177778	0.111111	0.04	0.04	0	0.04	0.04	0.0177778	0.00444444	0.04	0.0177778	0.04	0.00444444	0.111111	0.04	0.16	0.04	0.04	0.0177778	0.04	0.04	0.04	0.0177778	0.04	0.04	0.111111	0.04	0.04	0.04	0.04	0.0177778	0.111111	0.111111
0	0	0	0.0177778	0.04	0.00444444	0.0177778	0.00444444	0.00444444	0	0.04	0	0.0177778	0	0.00444444	0.00444444	0.00444444	0.00444444	0.0177778	0	0	0.04	0	0	0.00444444	0.0177778	0	0.00444444	0	0.0177778	0.0177778	0	0.04	0	0	0.00444444	0	0	0	0.00444444	0	0	0.0177778	0	0	0	0	0.00444444	0.0177778	0.0177778
0	0	0	0.0177778	0.04	0.00444444	0.0177778	0.00444444	0.00444444	0	0.04	0	0.0177778	0	0.00444444	0.00444444	0.00444444	0.00444444	0.0177778	0	0	0.04	0	0	0.00444444	0.0177778	0	0.00444444	0	0.0177778	0.0177778	0	0.04	0	0	0.00444444	0	0	0	0.00444444	0	0	0.0177778	0	0	0	0	0.00444444	0.0177778	0.0177778
0.0177778	0.0177778	0.0177778	0.0711111	0.00444444	0.04	0	0.04	0.00444444	0.0177778	0.00444444	0.0177778	0	0.0177778	0.04	0.04	0.04	0.04	0	0.0177778	0.0177778	0.111111	0.0177778	0.0177778	0.04	0.0711111	0.0177778	0.04	0.0177778	0.0711111	0	0.0177778	0.00444444	0.0177778	0.0177778	0.04	0.0177778	0.0177778	0.0177778	0.04	0.0177778	0.0177778	0	0.0177778	0.0177778	0.0177778	0.0177778	0.04	0	0
0	0	0	0.0177778	0.04	0.00444444	0.0177778	0.00444444	0.00444444	0	0.04	0	0.0177778	0	0.00444444	0.00444444	0.00444444	0.00444444	0.0177778	0	0	0.04	0	0	0.00444444	0.0177778	0	0.00444444	0	0.0177778	0.0177778	0	0.04	0	0	0.00444444	0	0	0	0.00444444	0	0	0.0177778	0	0	0	0	0.00444444	0.0177778	0.0177778
0.04	0.04	0.04	0.111111	0	0.0711111	0.00444444	0.0711111	0.0177778	0.04	0	0.04	0.00444444	0.04	0.0711111	0.0711111	0.0711111	0.0711111	0.00444444	0.04	0.04	0.16	0.04	0.04	0.0711111	0.111111	0.04	0.0711111	0.04	0.111111	0.00444444	0.04	0	0.04	0.04	0.0711111	0.04	0.04	0.04	0.0711111	0.04	0.04	0.00444444	0.04	0.04	0.04	0.04	0.0711111	0.00444444	0.00444444
0	0	0	0.0177778	0.04	0.00444444	0.0177778	0.00444444	0.00444444	0	0.04	0	0.0177778	0	0.00444444	0.00444444	0.00444444	0.00444444	0.0177778	0	0	0.04	0	0	0.00444444	0.0177778	0	0.00444444	0	0.0177778	0.0177778	0	0.04	0	0	0.00444444	0	0	0	0.00444444	0	0	0.0177778	0	0	0	0	0.00444444	0.0177778	0.0177778
0	0	0	0.0177778	0.04	0.00444444	0.0177778	0.00444444	0.00444444	0	0.04	0	0.0177778	0	0.00444444	0.00444444	0.00444444	0.00444444	0.0177778	0	0	0.04	0	0	0.00444444	0.0177778	0	0.00444444	0	0.0177778	0.0177778	0	0.04	0	0	0.00444444	0	0	0	0.00444444	0	0	0.0177778	0	0	0	0	0.00444444	0.0177778	0.0177778
0	0	0	0.0177778	0.04	0.00444444	0.0177778	0.00444444	0.00444444	0	0.04	0	0.0177778	0	0.00444444	0.00444444	0.00444444	0.00444444	0.0177778	0	0	0.04	0	0	0.00444444	0.0177778	0	0.00444444	0	0.0177778	0.0177778	0	0.04	0	0	0.00444444	0	0	0	0.00444444	0	0	0.0177778	0	0	0	0	0.00444444	0.0177778	0.0177778
0	0	0	0.0177778	0.04	0.00444444	0.0177778	0.00444444	0.00444444	0	0.04	0	0.0177778	0	0.00444444	0.00444444	0.00444444	0.00444444	0.0177778	0	0	0.04	0	0	0.00444444	0.0177778	0	0.00444444	0	0.0177778	0.0177778	0	0.04	0	0	0.00444444	0	0	0	0.00444444	0	0	0.0177778	0	0	0	0	0.00444444	0.0177778	0.0177778
0.00444444	0.00444444	0.00444444	0.00444444	0.0711111	0	0.04	0	0.0177778	0.00444444	0.0711111	0.00444444	0.04	0.00444444	0	0	0	0	0.04	0.00444444	0.00444444	0.0177778	0.00444444	0.00444444	0	0.00444444	0.00444444	0	0.00444444	0.00444444	0.04	0.00444444	0.0711111	0.00444444	0.00444444	0	0.00444444	0.00444444	0.00444444	0	0.00444444	0.00444444	0.04	0.00444444	0.00444444	0.00444444	0.00444444	0	0.04	0.04
0	0	0	0.0177778	0.04	0.00444444	0.0177778	0.00444444	0.00444444	0	0.04	0	0.0177778	0	0.00444444	0.00444444	0.00444444	0.00444444	0.0177778	0	0	0.04	0	0	0.00444444	0.0177778	0	0.00444444	0	0.0177778	0.0177778	0	0.04	0	0	0.00444444	0	0	0	0.00444444	0	0	0.0177778	0	0	0	0	0.00444444	0.0177778	0.0177778
0	0	0	0.0177778	0.04	0.00444444	0.0177778	0.00444444	0.00444444	0	0.04	0	0.0177778	0	0.00444444	0.00444444	0.00444444	0.00444444	0.0177778	0	0	0.04	0	0	0.00444444	0.0177778	0	0.00444444	0	0.0177778	0.0177778	0	0.04	0	0	0.00444444	0	0	0	0.00444444	0	0	0.0177778	0	0	0	0	0.00444444	0.0177778	0.0177778
0.0177778	0.0177778	0.0177778	0.0711111	0.00444444	0.04	0	0.04	0.00444444	0.0177778	0.00444444	0.0177778	0	0.0177778	0.04	0.04	0.04	0.04	0	0.0177778	0.0177778	0.111111	0.0177778	0.0177778	0.04	0.0711111	0.0177778	0.04	0.0177778	0.0711111	0	0.0177778	0.00444444	0.0177778	0.0177778	0.04	0.0177778	0.0177778	0.0177778	0.04	0.0177778	0.0177778	0	0.0177778	0.0177778	0.0177778	0.0177778	0.04	0	0
0	0	0	0.0177778	0.04	0.00444444	0.0177778	0.00444444	0.00444444	0	0.04	0	0.0177778	0	0.00444444	0.00444444	0.00444444	0.00444444	0.0177778	0	0	0.04	0	0	0.00444444	0.0177778	0	0.00444444	0	0.0177778	0.0177778	0	0.04	0	0	0.00444444	0	0	0	0.00444444	0	0	0.0177778	0	0	0	0	0.00444444	0.0177778	0.0177778
0	0	0	0.0177778	0.04	0.00444444	0.0177778	0.00444444	0.00444444	0	0.04	0	0.0177778	0	0.00444444	0.00444444	0.00444444	0.00444444	0.0177778	0	0	0.04	0	0	0.00444444	0.0177778	0	0.00444444	0	0.0177778	0.0177778	0	0.04	0	0	0.00444444	0	0	0	0.00444444	0	0	0.0177778	0	0	0	0	0.00444444	0.0177778	0.0177778
0	0	0	0.0177778	0.04	0.00444444	0.0177778	0.00444444	0.00444444	0	0.04	0	0.0177778	0	0.00444444	0.00444444	0.00444444	0.00444444	0.0177778	0	0	0.04	0	0	0.00444444	0.0177778	0	0.00444444	0	0.0177778	0.0177778	0	0.04	0	0	0.00444444	0	0	0	0.00444444	0	0	0.0177778	0	0	0	0	0.00444444	0.0177778	0.0177778
0	0	0	0.0177778	0.04	0.00444444	0.0177778	0.00444444	0.00444444	0	0.04	0	0.0177778	0	0.00444444	0.00444444	0.00444444	0.00444444	0.0177778	0	0	0.04	0	0	0.00444444	0.0177778	0	0.00444444	0	0.0177778	0.0177778	0	0.04	0	0	0.00444444	0	0	0	0.00444444	0	0	0.0177778	0	0	0	0	0.00444444	0.0177778	0.0177778
0.0177778	0.0177778	0.0177778	0	0.111111	0.00444444	0.0711111	0.00444444	0.04	0.0177778	0.111111	0.0177778	0.0711111	0.0177778	0.00444444	0.00444444	0.00444444	0.00444444	0.0711111	0.0177778	0.0177778	0.00444444	0.0177778	0.0177778	0.00444444	0	0.0177778	0.00444444	0.0177778	0	0.0711111	0.0177778	0.111111	0.0177778	0.0177778	0.00444444	0.0177778	0.0177778	0.0177778	0.00444444	0.0177778	0.0177778	0.0711111	0.0177778	0.0177778	0.0177778	0.0177778	0.00444444	0.0711111	0.0711111
0	0	0	0.0177778	0.04	0.00444444	0.0177778	0.00444444	0.00444444	0	0.04	0	0.0177778	0	0.00444444	0.00444444	0.00444444	0.00444444	0.0177778	0	0	0.04	0	0	0.00444444	0.0177778	0	0.00444444	0	0.0177778	0.0177778	0	0.04	0	0	0.00444444	0	0	0	0.00444444	0	0	0.0177778	0	0	0	0	0.00444444	0.0177778	0.0177778
0.0177778	0.0177778	0.0177778	0	0.111111	0.00444444	0.0711111	0.00444444	0.04	0.0177778	0.111111	0.0177778	0.0711111	0.0177778	0.00444444	0.00444444	0.00444444	0.00444444	0.0711111	0.0177778	0.0177778	0.00444444	0.0177778	0.0177778	0.00444444	0	0.0177778	0.00444444	0.0177778	0	0.0711111	0.0177778	0.111111	0.0177778	0.0177778	0.00444444	0.0177778	0.0177778	0.0177778	0.00444444	0.0177778	0.0177778	0.0711111	0.0177778	0.0177778	0.0177778	0.0177778	0.00444444	0.0711111	0.0711111
0	0	0	0.0177778	0.04	0.00444444	0.0177778	0.00444444	0.00444444	0	0.04	0	0.0177778	0	0.00444444	0.00444444	0.00444444	0.00444444	0.0177778	0	0	0.04	0	0	0.00444444	0.0177778	0	0.00444444	0	0.0177778	0.0177778	0	0.04	0	0	0.00444444	0	0	0	0.00444444	0	0	0.0177778	0	0	0	0	0.00444444	0.0177778	0.0177778
0.0177778	0.0177778	0.0177778	0	0.111111	0.00444444	0.0711111	0.00444444	0.04	0.0177778	0.111111	0.0177778	0.0711111	0.0177778	0.00444444	0.00444444	0.00444444	0.00444444	0.0711111	0.0177778	0.0177778	0.00444444	0.0177778	0.0177778	0.00444444	0	0.0177778	0.00444444	0.0177778	0	0.0711111	0.0177778	0.111111	0.0177778	0.0177778	0.00444444	0.0177778	0.0177778	0.0177778	0.00444444	0.0177778	0.0177778	0.0711111	0.0177778	0.0177778	0.0177778	0.0177778	0.00444444	0.0711111	0.0711111
0	0	0	0.0177778	0.04	0.00444444	0.0177778	0.00444444	0.00444444	0	0.04	0	0.0177778	0	0.00444444	0.00444444	0.00444444	0.00444444	0.0177778	0	0	0.04	0	0	0.00444444	0.0177778	0	0.00444444	0	0.0177778	0.0177778	0	0.04	0	0	0.00444444	0	0	0	0.00444444	0	0	0.0177778	0	0	0	0	0.00444444	0.0177778	0.0177778
0.0177778	0.0177778	0.0177778	0	0.111111	0.00444444	0.0711111	0.00444444	0.04	0.0177778	0.111111	0.0177778	0.0711111	0.0177778	0.00444444	0.00444444	0.00444444	0.00444444	0.0711111	0.0177778	0.0177778	0.00444444	0.0177778	0.0177778	0.00444444	0	0.0177778	0.00444444	0.0177778	0	0.0711111	0.0177778	0.111111	0.0177778	0.0177778	0.00444444	0.0177778	0.0177778	0.0177778	0.00444444	0.0177778	0.0177778	0.0711111	0.0177778	0.0177778	0.0177778	0.0177778	0.00444444	0.0711111	0.0711111
0.00444444	0.00444444	0.00444444	0.00444444	0.0711111	0	0.04	0	0.0177778	0.00444444	0.0711111	0.00444444	0.04	0.00444444	0	0	0	0	0.04	0.00444444	0.00444444	0.0177778	0.00444444	0.00444444	0	0.00444444	0.00444444	0	0.00444444	0.00444444	0.04	0.00444444	0.0711111	0.00444444	0.00444444	0	0.00444444	0.00444444	0.00444444	0	0.00444444	0.00444444	0.04	0.00444444	0.00444444	0.00444444	0.00444444	0	0.04	0.04
0.0177778	0.0177778	0.0177778	0	0.111111	0.00444444	0.0711111	0.00444444	0.04	0.0177778	0.111111	0.0177778	0.0711111	0.0177778	0.00444444	0.00444444	0.00444444	0.00444444	0.0711111	0.0177778	0.0177778	0.00444444	0.0177778	0.0177778	0.00444444	0	0.0177778	0.00444444	0.0177778	0	0.0711111	0.0177778	0.111111	0.0177778	0.0177778	0.00444444	0.0177778	0.0177778	0.0177778	0.00444444	0.0177778	0.0177778	0.0711111	0.0177778	0.0177778	0.0177778	0.0177778	0.00444444	0.0711111	0.0711111
0	0	0	0.0177778	0.04	0.00444444	0.0177778	0.00444444	0.00444444	0	0.04	0	0.0177778	0	0.00444444	0.00444444	0.00444444	0.00444444	0.0177778	0	0	0.04	0	0	0.00444444	0.0177778	0	0.00444444	0	0.0177778	0.0177778	0	0.04	0	0	0.00444444	0	0	0	0.00444444	0	0	0.0177778	0	0	0	0	0.00444444	0.0177778	0.0177778
0.00444444	0.00444444	0.00444444	0.00444444	0.0711111	0	0.04	0	0.0177778	0.00444444	0.0711111	0.00444444	0.04	0.00444444	0	0	0	0	0.04	0.00444444	0.00444444	0.0177778	0.00444444	0.00444444	0	0.00444444	0.00444444	0	0.00444444	0.00444444	0.04	0.00444444	0.0711111	0.00444444	0.00444444	0	0.00444444	0.00444444	0.00444444	0	0.00444444	0.00444444	0.04	0.00444444	0.00444444	0.00444444	0.00444444	0	0.04	0.04
0.0177778	0.0177778	0.0177778	0.0711111	0.00444444	0.04	0	0.04	0.00444444	0.0177778	0.00444444	0.0177778	0	0.0177778	0.04	0.04	0.04	0.04	0	0.0177778	0.0177778	0.111111	0.0177778	0.0177778	0.04	0.0711111	0.0177778	0.04	0.0177778	0.0711111	0	0.0177778	0.00444444	0.0177778	0.0177778	0.04	0.0177778	0.0177778	0.0177778	0.04	0.0177778	0.0177778	0	0.0177778	0.0177778	0.0177778	0.0177778	0.04	0	0
0.0177778	0.0177778	0.0177778	0.0711111	0.00444444	0.04	0	0.04	0.00444444	0.0177778	0.00444444	0.0177778	0	0.0177778	0.04	0.04	0.04	0.04	0	0.0177778	0.0177778	0.111111	0.0177778	0.0177778	0.04	0.0711111	0.0177778	0.04	0.0177778	0.0711111	0	0.0177778	0.00444444	0.0177778	0.0177778	0.04	0.0177778	0.0177778	0.0177778	0.04	0.0177778	0.0177778	0	0.0177778	0.0177778	0.0177778	0.0177778	0.04	0	0
0.0177778	0.0177778	0.0177778	0.0711111	0.00444444	0.04	0	0.04	0.00444444	0.0177778	0.00444444	0.0177778	0	0.0177778	0.04	0.04	0.04	0.04	0	0.0177778	0.0177778	0.111111	0.0177778	0.0177778	0.04	0.0711111	0.0177778	0.04	0.0177778	0.0711111	0	0.0177778	0.00444444	0.0177778	0.0177778	0.04	0.0177778	0.0177778	0.0177778	0.04	0.0177778	0.0177778	0	0.0177778	0.0177778	0.0177778	0.0177778	0.04	0	0
0	0	0	0.0177778	0.04	0.00444444	0.0177778	0.00444444	0.00444444	0	0.04	0	0.0177778	0	0.00444444	0.00444444	0.00444444	0.00444444	0.0177778	0	0	0.04	0	0	0.00444444	0.0177778	0	0.00444444	0	0.0177778	0.0177778	0	0.04	0	0	0.00444444	0	0	0	0.00444444	0	0	0.0177778	0	0	0	0	0.00444444	0.0177778	0.0177778
0	0	0	0.0177778	0.04	0.00444444	0.0177778	0.00444444	0.00444444	0	0.04	0	0.0177778	0	0.00444444	0.00444444	0.00444444	0.00444444	0.0177778	0	0	0.04	0	0	0.00444444	0.0177778	0	0.00444444	0	0.0177778	0.0177778	0	0.04	0	0	0.00444444	0	0	0	0.00444444	0	0	0.0177778	0	0	0	0	0.00444444	0.0177778	0.0177778
0.00444444	0.00444444	0.00444444	0.00444444	0.0711111	0	0.04	0	0.0177778	0.00444444	0.0711111	0.00444444	0.04	0.00444444	0	0	0	0	0.04	0.00444444	0.00444444	0.0177778	0.00444444	0.00444444	0	0.00444444	0.00444444	0	0.00444444	0.00444444	0.04	0.00444444	0.0711111	0.00444444	0.00444444	0	0.00444444	0.00444444	0.00444444	0	0.00444444	0.00444444	0.04	0.00444444	0.00444444	0.00444444	0.00444444	0	0.04	0.04
0	0	0	0.0177778	0.04	0.00444444	0.0177778	0.00444444	0.00444444	0	0.04	0	0.0177778	0	0.00444444	0.00444444	0.00444444	0.00444444	0.0177778	0	0	0.04	0	0	0.00444444	0.0177778	0	0.00444444	0	0.0177778	0.0177778	0	0.04	0	0	0.00444444	0	0	0	0.00444444	0	0	0.0177778	0	0	0	0	0.00444444	0.0177778	0.0177778
0.00444444	0.00444444	0.00444444	0.00444444	0.0711111	0	0.04	0	0.0177778	0.00444444	0.0711111	0.00444444	0.04	0.00444444	0	0	0	0	0.04	0.00444444	0.00444444	0.0177778	0.00444444	0.00444444	0	0.00444444	0.00444444	0	0.00444444	0.00444444	0.04	0.00444444	0.0711111	0.00444444	0.00444444	0	0.00444444	0.00444444	0.00444444	0	0.00444444	0.00444444	0.04	0.00444444	0.00444444	0.00444444	0.00444444	0	0.04	0.04
0.0177778	0.0177778	0.0177778	0.0711111	0.00444444	0.04	0	0.04	0.00444444	0.0177778	0.00444444	0.0177778	0	0.0177778	0.04	0.04	0.04	0.04	0	0.0177778	0.0177778	0.111111	0.0177778	0.0177778	0.04	0.0711111	0.0177778	0.04	0.0177778	0.0711111	0	0.0177778	0.00444444	0.0177778	0.0177778	0.04	0.0177778	0.0177778	0.0177778	0.04	0.0177778	0.0177778	0	0.0177778	0.0177778	0.0177778	0.0177778	0.04	0	0
0.00444444	0.00444444	0.00444444	0.00444444	0.0711111	0	0.04	0	0.0177778	0.00444444	0.0711111	0.00444444	0.04	0.00444444	0	0	0	0	0.04	0.00444444	0.00444444	0.0177778	0.00444444	0.00444444	0	0.00444444	0.00444444	0	0.00444444	0.00444444	0.04	0.00444444	0.0711111	0.00444444	0.00444444	0	0.00444444	0.00444444	0.00444444	0	0.00444444	0.00444444	0.04	0.00444444	0.00444444	0.00444444	0.00444444	0	0.04	0.04
0.00444444	0.00444444	0.00444444	0.00444444	0.0711111	0	0.04	0	0.0177778	0.00444444	0.0711111	0.00444444	0.04	0.00444444	0	0	0	0	0.04	0.00444444	0.00444444	0.0177778	0.00444444	0.00444444	0	0.00444444	0.00444444	0	0.00444444	0.00444444	0.04	0.00444444	0.0711111	0.00444444	0.00444444	0	0.00444444	0.00444444	0.00444444	0	0.00444444	0.00444444	0.04	0.00444444	0.00444444	0.00444444	0.00444444	0	0.04	0.04
0.00444444	0.00444444	0.00444444	0.00444444	0.0711111	0	0.04	0	0.0177778	0.00444444	0.0711111	0.00444444	0.04	0.00444444	0	0	0	0	0.04	0.00444444	0.00444444	0.0177778	0.00444444	0.00444444	0	0.00444444	0.00444444	0	0.00444444	0.00444444	0.04	0.00444444	0.0711111	0.00444444	0.00444444	0	0.00444444	0.00444444	0.00444444	0	0.00444444	0.00444444	0.04	0.00444444	0.00444444	0.00444444	0.00444444	0	0.04	0.04
0	0	0	0.0177778	0.04	0.00444444	0.0177778	0.00444444	0.00444444	0	0.04	0	0.0177778	0	0.00444444	0.00444444	0.00444444	0.00444444	0.0177778	0	0	0.04	0	0	0.00444444	0.0177778	0	0.00444444	0	0.0177778	0.0177778	0	0.04	0	0	0.00444444	0	0	0	0.00444444	0	0	0.0177778	0	0	0	0	0.00444444	0.0177778	0.0177778
0	0	0	0.0177778	0.04	0.00444444	0.0177778	0.00444444	0.00444444	0	0.04	0	0.0177778	0	0.00444444	0.00444444	0.00444444	0.00444444	0.0177778	0	0	0.04	0	0	0.00444444	0.0177778	0	0.00444444	0	0.0177778	0.0177778	0	0.04	0	0	0.00444444	0	0	0	0.00444444	0	0	0.0177778	0	0	0	0	0.00444444	0.0177778	0.0177778
0.0177778	0.0177778	0.0177778	0.0711111	0.00444444	0.04	0	0.04	0.00444444	0.0177778	0.00444444	0.0177778	0	0.0177778	0.04	0.04	0.04	0.04	0	0.0177778	0.0177778	0.111111	0.0177778	0.0177778	0.04	0.0711111	0.0177778	0.04	0.0177778	0.0711111	0	0.0177778	0.00444444	0.0177778	0.0177778	0.04	0.0177778	0.0177778	0.0177778	0.04	0.0177778	0.0177778	0	0.0177778	0.0177778	0.0177778	0.0177778	0.04	0	0
0.0177778	0.0177778	0.0177778	0	0.111111	0.00444444	0.0711111	0.00444444	0.04	0.0177778	0.111111	0.0177778	0.0711111	0.0177778	0.00444444	0.00444444	0.00444444	0.00444444	0.0711111	0.0177778	0.0177778	0.00444444	0.0177778	0.0177778	0.00444444	0	0.0177778	0.00444444	0.0177778	0	0.0711111	0.0177778	0.111111	0.0177778	0.0177778	0.00444444	0.0177778	0.0177778	0.0177778	0.00444444	0.0177778	0.0177778	0.0711111	0.0177778	0.0177778	0.0177778	0.0177778	0.00444444	0.0711111	0.0711111
0.00444444	0.00444444	0.00444444	0.00444444	0.0711111	0	0.04	0	0.0177778	0.00444444	0.0711111	0.00444444	0.04	0.00444444	0	0	0	0	0.04	0.00444444	0.00444444	0.0177778	0.00444444	0.00444444	0	0.00444444	0.00444444	0	0.00444444	0.00444444	0.04	0.00444444	0.0711111	0.00444444	0.00444444	0	0.00444444	0.00444444	0.00444444	0	0.00444444	0.00444444	0.04	0.00444444	0.00444444	0.00444444	0.00444444	0	0.04	0.04
0.0177778	0.0177778	0.0177778	0	0.111111	0.00444444	0.0711111	0.00444444	0.04	0.0177778	0.111111	0.0177778	0.0711111	0.0177778	0.00444444	0.00444444	0.00444444	0.00444444	0.0711111	0.0177778	0.0177778	0.00444444	0.0177778	0.0177778	0.00444444	0	0.0177778	0.00444444	0.0177778	0	0.0711111	0.0177778	0.111111	0.0177778	0.0177778	0.00444444	0.0177778	0.0177778	0.0177778	0.00444444	0.0177778	0.0177778	0.0711111	0.0177778	0.0177778	0.0177778	0.0177778	0.00444444	0.0711111	0.0711111
0.00444444	0.00444444	0.00444444	0.00444444	0.0711111	0	0.04	0	0.0177778	0.00444444	0.0711111	0.00444444	0.04	0.00444444	0	0	0	0	0.04	0.00444444	0.00444444	0.0177778	0.00444444	0.00444444	0	0.00444444	0.00444444	0	0.00444444	0.00444444	0.04	0.00444444	0.0711111	0.00444444	0.00444444	0	0.00444444	0.00444444	0.00444444	0	0.00444444	0.00444444	0.04	0.00444444	0.00444444	0.00444444	0.00444444	0	0.04	0.04
0.0177778	0.0177778	0.0177778	0	0.111111	0.00444444	0.0711111	0.00444444	0.04	0.0177778	0.111111	0.0177778	0.0711111	0.0177778	0.00444444	0.00444444	0.00444444	0.00444444	0.0711111	0.0177778	0.0177778	0.00444444	0.0177778	0.0177778	0.00444444	0	0.0177778	0.00444444	0.0177778	0	0.0711111	0.0177778	0.111111	0.0177778	0.0177778	0.00444444	0.0177778	0.0177778	0.0177778	0.00444444	0.0177778	0.0177778	0.0711111	0.0177778	0.0177778	0.0177778	0.0177778	0.00444444	0.0711111	0.0711111
0.0177778	0.0177778	0.0177778	0.0711111	0.00444444	0.04	0	0.04	0.00444444	0.0177778	0.00444444	0.0177778	0	0.0177778	0.04	0.04	0.04	0.04	0	0.0177778	0.0177778	0.111111	0.0177778	0.0177778	0.04	0.0711111	0.0177778	0.04	0.0177778	0.0711111	0	0.0177778	0.00444444	0.0177778	0.0177778	0.04	0.0177778	0.0177778	0.0177778	0.04	0.0177778	0.0177778	0	0.0177778	0.0177778	0.0177778	0.0177778	0.04	0	0
0.00444444	0.00444444	0.00444444	0.00444444	0.0711111	0	0.04	0	0.0177778	0.00444444	0.0711111	0.00444444	0.04	0.00444444	0	0	0	0	0.04	0.00444444	0.00444444	0.0177778	0.00444444	0.00444444	0	0.00444444	0.00444444	0	0.00444444	0.00444444	0.04	0.00444444	0.0711111	0.00444444	0.00444444	0	0.00444444	0.00444444	0.00444444	0	0.00444444	0.00444444	0.04	0.00444444	0.00444444	0.00444444	0.00444444	0	0.04	0.04
0.00444444	0.00444444	0.00444444	0.00444444	0.0711111	0	0.04	0	0.0177778	0.00444444	0.0711111	0.00444444	0.04	0.00444444	0	0	0	0	0.04	0.00444444	0.00444444	0.0177778	0.00444444	0.00444444	0	0.00444444	0.00444444	0	0.00444444	0.00444444	0.04	0.00444444	0.0711111	0.00444444	0.00444444	0	0.00444444	0.00444444	0.00444444	0	0.00444444	0.00444444	0.04	0.00444444	0.00444444	0.00444444	0.00444444	0	0.04	0.04
0.00444444	0.00444444	0.00444444	0.00444444	0.0711111	0	0.04	0	0.0177778	0.00444444	0.0711111	0.00444444	0.04	0.00444444	0	0	0	0	0.04	0.00444444	0.00444444	0.0177778	0.00444444	0.00444444	0	0.00444444	0.00444444	0	0.00444444	0.00444444	0.04	0.00444444	0.0711111	0.00444444	0.00444444	0	0.00444444	0.00444444	0.00444444	0	0.00444444	0.00444444	0.04	0.00444444	0.00444444	0.00444444	0.00444444	0	0.04	0.04
0	0	0	0.0177778	0.04	0.00444444	0.0177778	0.00444444	0.00444444	0	0.04	0	0.0177778	0	0.00444444	0.00444444	0.00444444	0.00444444	0.0177778	0	0	0.04	0	0	0.00444444	0.0177778	0	0.00444444	0	0.0177778	0.0177778	0	0.04	0	0	0.00444444	0	0	0	0.00444444	0	0	0.0177778	0	0	0	0	0.00444444	0.0177778	0.0177778
0.00444444	0.00444444	0.00444444	0.00444444	0.0711111	0	0.04	0	0.0177778	0.00444444	0.0711111	0.00444444	0.04	0.00444444	0	0	0	0	0.04	0.00444444	0.00444444	0.0177778	0.00444444	0.00444444	0	0.00444444	0.00444444	0	0.00444444	0.00444444	0.04	0.00444444	0.0711111	0.00444444	0.00444444	0	0.00444444	0.00444444	0.00444444	0	0.00444444	0.00444444	0.04	0.00444444	0.00444444	0.00444444	0.00444444	0	0.04	0.04
0.00444444	0.00444444	0.00444444	0.00444444	0.0711111	0	0.04	0	0.0177778	0.00444444	0.0711111	0.00444444	0.04	0.00444444	0	0	0	0	0.04	0.00444444	0.00444444	0.0177778	0.00444444	0.00444444	0	0.00444444	0.00444444	0	0.00444444	0.00444444	0.04	0.00444444	0.0711111	0.00444444	0.00444444	0	0.00444444	0.00444444	0.00444444	0	0.00444444	0.00444444	0.04	0.00444444	0.00444444	0.00444444	0.00444444	0	0.04	0.04
0.00444444	0.00444444	0.00444444	0.00444444	0.0711111	0	0.04	0	0.0177778	0.00444444	0.0711111	0.00444444	0.04	0.00444444	0	0	0	0	0.04	0.00444444	0.00444444	0.0177778	0.00444444	0.00444444	0	0.00444444	0.00444444	0	0.00444444	0.00444444	0.04	0.00444444	0.0711111	0.00444444	0.00444444	0	0.00444444	0.00444444	0.00444444	0	0.00444444	0.00444444	0.04	0.00444444	0.00444444	0.00444444	0.00444444	0	0.04	0.04
0	0	0	0.0177778	0.04	0.00444444	0.0177778	0.00444444	0.00444444	0	0.04	0	0.0177778	0	0.00444444	0.00444444	0.00444444	0.00444444	0.0177778	0	0	0.04	0	0	0.00444444	0.0177778	0	0.00444444	0	0.0177778	0.0177778	0	0.04	0	0	0.00444444	0	0	0	0.00444444	0	0	0.0177778	0	0	0	0	0.00444444	0.0177778	0.0177778
0.00444444	0.00444444	0.00444444	0.00444444	0.0711111	0	0.04	0	0.0177778	0.00444444	0.0711111	0.00444444	0.04	0.00444444	0	0	0	0	0.04	0.00444444	0.00444444	0.0177778	0.00444444	0.00444444	0	0.00444444	0.00444444	0	0.00444444	0.00444444	0.04	0.00444444	0.0711111	0.00444444	0.00444444	0	0.00444444	0.00444444	0.00444444	0	0.00444444	0.00444444	0.04	0.00444444	0.00444444	0.00444444	0.00444444	0	0.04	0.04
0.04	0.04	0.04	0.111111	0	0.0711111	0.00444444	0.0711111	0.0177778	0.04	0	0.04	0.00444444	0.04	0.0711111	0.0711111	0.0711111	0.0711111	0.00444444	0.04	0.04	0.16	0.04	0.04	0.0711111	0.111111	0.04	0.0711111	0.04	0.111111	0.00444444	0.04	0	0.04	0.04	0.0711111	0.04	0.04	0.04	0.0711111	0.04	0.04	0.00444444	0.04	0.04	0.04	0.04	0.0711111	0.00444444	0.00444444
0.0177778	0.0177778	0.0177778	0	0.111111	0.00444444	0.0711111	0.00444444	0.04	0.0177778	0.111111	0.0177778	0.0711111	0.0177778	0.00444444	0.00444444	0.00444444	0.00444444	0.0711111	0.0177778	0.0177778	0.00444444	0.0177778	0.0177778	0.00444444	0	0.0177778	0.00444444	0.0177778	0	0.0711111	0.0177778	0.111111	0.0177778	0.0177778	0.00444444	0.0177778	0.0177778	0.0177778	0.00444444	0.0177778	0.0177778	0.0711111	0.0177778	0.0177778	0.0177778	0.0177778	0.00444444	0.0711111	0.0711111
0	0	0	0.0177778	0.04	0.00444444	0.0177778	0.00444444	0.00444444	0	0.04	0	0.0177778	0	0.00444444	0.00444444	0.00444444	0.00444444	0.0177778	0	0	0.04	0	0	0.00444444	0.0177778	0	0.00444444	0	0.0177778	0.0177778	0	0.04	0	0	0.00444444	0	0	0	0.00444444	0	0	0.0177778	0	0	0	0	0.00444444	0.0177778	0.0177778
0.00444444	0.00444444	0.00444444	0.00444444	0.0711111	0	0.04	0	0.0177778	0.00444444	0.0711111	0.00444444	0.04	0.00444444	0	0	0	0	0.04	0.00444444	0.00444444	0.0177778	0.00444444	0.00444444	0	0.00444444	0.00444444	0	0.00444444	0.00444444	0.04	0.00444444	0.0711111	0.00444444	0.00444444	0	0.00444444	0.00444444	0.00444444	0	0.00444444	0.00444444	0.04	0.00444444	0.00444444	0.00444444	0.00444444	0	0.04	0.04
0	0	0	0.0177778	0.04	0.00444444	0.0177778	0.00444444	0.00444444	0	0.04	0	0.0177778	0	0.00444444	0.00444444	0.00444444	0.00444444	0.0177778	0	0	0.04	0	0	0.00444444	0.0177778	0	0.00444444	0	0.0177778	0.0177778	0	0.04	0	0	0.00444444	0	0	0	0.00444444	0	0	0.0177778	0	0	0	0	0.00444444	0.0177778	0.0177778
0.00444444	0.00444444	0.00444444	0.00444444	0.0711111	0	0.04	0	0.0177778	0.00444444	0.0711111	0.00444444	0.04	0.00444444	0	0	0	0	0.04	0.00444444	0.00444444	0.0177778	0.00444444	0.00444444	0	0.00444444	0.00444444	0	0.00444444	0.00444444	0.04	0.00444444	0.0711111	0.00444444	0.00444444	0	0.00444444	0.00444444	0.00444444	0	0.00444444	0.00444444	0.04	0.00444444	0.00444444	0.00444444	0.00444444	0	0.04	0.04
0.04	0.04	0.04	0.111111	0	0.0711111	0.00444444	0.0711111	0.0177778	0.04	0	0.04	0.00444444	0.04	0.0711111	0.0711111	0.0711111	0.0711111	0.00444444	0.04	0.04	0.16	0.04	0.04	0.0711111	0.111111	0.04	0.0711111	0.04	0.111111	0.00444444	0.04	0	0.04	0.04	0.0711111	0.04	0.04	0.04	0.0711111	0.04	0.04	0.00444444	0.04	0.04	0.04	0.04	0.0711111	0.00444444	0.00444444
0	0	0	0.0177778	0.04	0.00444444	0.0177778	0.00444444	0.00444444	0	0.04	0	0.0177778	0	0.00444444	0.00444444	0.00444444	0.00444444	0.0177778	0	0	0.04	0	0	0.00444444	0.0177778	0	0.00444444	0	0.0177778	0.0177778	0	0.04	0	0	0.00444444	0	0	0	0.00444444	0	0	0.0177778	0	0	0	0	0.00444444	0.0177778	0.0177778
0	0	0	0.0177778	0.04	0.00444444	0.0177778	0.00444444	0.00444444	0	0.04	0	0.0177778	0	0.00444444	0.00444444	0.00444444	0.00444444	0.0177778	0	0	0.04	0	0	0.00444444	0.0177778	0	0.00444444	0	0.0177778	0.0177778	0	0.04	0	0	0.00444444	0	0	0	0.00444444	0	0	0.0177778	0	0	0	0	0.00444444	0.0177778	0.0177778
0	0	0	0.0177778	0.04	0.00444444	0.0177778	0.00444444	0.00444444	0	0.04	0	0.0177778	0	0.00444444	0.00444444	0.00444444	0.00444444	0.0177778	0	0	0.04	0	0	0.00444444	0.0177778	0	0.00444444	0	0.0177778	0.0177778	0	0.04	0	0	0.00444444	0	0	0	0.00444444	0	0	0.0177778	0	0	0	0	0.00444444	0.0177778	0.0177778
0	0	0	0.0177778	0.04	0.00444444	0.0177778	0.00444444	0.00444444	0	0.04	0	0.0177778	0	0.00444444	0.00444444	0.00444444	0.00444444	0.0177778	0	0	0.04	0	0	0.00444444	0.0177778	0	0.00444444	0	0.0177778	0.0177778	0	0.04	0	0	0.00444444	0	0	0	0.00444444	0	0	0.0177778	0	0	0	0	0.00444444	0.0177778	0.0177778
0.00444444	0.00444444	0.00444444	0.00444444	0.0711111	0	0.04	0	0.0177778	0.00444444	0.0711111	0.00444444	0.04	0.00444444	0	0	0	0	0.04	0.00444444	0.00444444	0.0177778	0.00444444	0.00444444	0	0.00444444	0.00444444	0	0.00444444	0.00444444	0.04	0.00444444	0.0711111	0.00444444	0.00444444	0	0.00444444	0.00444444	0.00444444	0	0.00444444	0.00444444	0.04	0.00444444	0.00444444	0.00444444	0.00444444	0	0.04	0.04
0.00444444	0.00444444	0.00444444	0.00444444	0.0711111	0	0.04	0	0.0177778	0.00444444	0.0711111	0.00444444	0.04	0.00444444	0	0	0	0	0.04	0.00444444	0.00444444	0.0177778	0.00444444	0.00444444	0	0.00444444	0.00444444	0	0.00444444	0.00444444	0.04	0.00444444	0.0711111	0.00444444	0.00444444	0	0.00444444	0.00444444	0.00444444	0	0.00444444	0.00444444	0.04	0.00444444	0.00444444	0.00444444	0.00444444	0	0.04	0.04
0.00444444	0.00444444	0.00444444	0.00444444	0.0711111	0	0.04	0	0.0177778	0.00444444	0.0711111	0.00444444	0.04	0.00444444	0	0	0	0	0.04	0.00444444	0.00444444	0.0177778	0.00444444	0.00444444	0	0.00444444	0.00444444	0	0.00444444	0.00444444	0.04	0.00444444	0.0711111	0.00444444	0.00444444	0	0.00444444	0.00444444	0.00444444	0	0.00444444	0.00444444	0.04	0.00444444	0.00444444	0.00444444	0.00444444	0	0.04	0.04
0.00444444	0.00444444	0.00444444	0.00444444	0.0711111	0	0.04	0	0.0177778	0.00444444	0.0711111	0.00444444	0.04	0.00444444	0	0	0	0	0.04	0.00444444	0.00444444	0.0177778	0.00444444	0.00444444	0	0.00444444	0.00444444	0	0.00444444	0.00444444	0.04	0.00444444	0.0711111	0.00444444	0.00444444	0	0.00444444	0.00444444	0.00444444	0	0.00444444	0.00444444	0.04	0.00444444	0.00444444	0.00444444	0.00444444	0	0.04	0.04
0.0177778	0.0177778	0.0177778	0	0.111111	0.00444444	0.0711111	0.00444444	0.04	0.0177778	0.111111	0.0177778	0.0711111	0.0177778	0.00444444	0.00444444	0.00444444	0.00444444	0.0711111	0.0177778	0.0177778	0.00444444	0.0177778	0.0177778	0.00444444	0	0.0177778	0.00444444	0.0177778	0	0.0711111	0.0177778	0.111111	0.0177778	0.0177778	0.00444444	0.0177778	0.0177778	0.0177778	0.00444444	0.0177778	0.0177778	0.0711111	0.0177778	0.0177778	0.0177778	0.0177778	0.00444444	0.0711111	0.0711111
0.0177778	0.0177778	0.0177778	0.0711111	0.00444444	0.04	0	0.04	0.00444444	0.0177778	0.00444444	0.0177778	0	0.0177778	0.04	0.04	0.04	0.04	0	0.0177778	0.0177778	0.111111	0.0177778	0.0177778	0.04	0.0711111	0.0177778	0.04	0.0177778	0.0711111	0	0.0177778	0.00444444	0.0177778	0.0177778	0.04	0.0177778	0.0177778	0.0177778	0.04	0.0177778	0.0177778	0	0.0177778	0.0177778	0.0177778	0.0177778	0.04	0	0
0.00444444	0.00444444	0.00444444	0.00444444	0.0711111	0	0.04	0	0.0177778	0.00444444	0.0711111	0.00444444	0.04	0.00444444	0	0	0	0	0.04	0.00444444	0.00444444	0.0177778	0.00444444	0.00444444	0	0.00444444	0.00444444	0	0.00444444	0.00444444	0.04	0.00444444	0.0711111	0.00444444	0.00444444	0	0.00444444	0.00444444	0.00444444	0	0.00444444	0.00444444	0.04	0.00444444	0.00444444	0.00444444	0.00444444	0	0.04	0.04
0.0177778	0.0177778	0.0177778	0.0711111	0.00444444	0.04	0	0.04	0.00444444	0.0177778	0.00444444	0.0177778	0	0.0177778	0.04	0.04	0.04	0.04	0	0.0177778	0.0177778	0.111111	0.0177778	0.0177778	0.04	0.0711111	0.0177778	0.04	0.0177778	0.0711111	0	0.0177778	0.00444444	0.0177778	0.0177778	0.04	0.0177778	0.0177778	0.0177778	0.04	0.0177778	0.0177778	0	0.0177778	0.0177778	0.0177778	0.0177778	0.04	0	0
0	0	0	0.0177778	0.04	0.00444444	0.0177778	0.00444444	0.00444444	0	0.04	0	0.0177778	0	0.00444444	0.00444444	0.00444444	0.00444444	0.0177778	0	0	0.04	0	0	0.00444444	0.0177778	0	0.00444444	0	0.0177778	0.0177778	0	0.04	0	0	0.00444444	0	0	0	0.00444444	0	0	0.0177778	0	0	0	0	0.00444444	0.0177778	0.0177778
0.00444444	0.00444444	0.00444444	0.04	0.0177778	0.0177778	0.00444444	0.0177778	0	0.00444444	0.0177778	0.00444444	0.00444444	0.00444444	0.0177778	0.0177778	0.0177778	0.0177778	0.00444444	0.00444444	0.00444444	0.0711111	0.00444444	0.00444444	0.0177778	0.04	0.00444444	0.0177778	0.00444444	0.04	0.00444444	0.00444444	0.0177778	0.00444444	0.00444444	0.0177778	0.00444444	0.00444444	0.00444444	0.0177778	0.00444444	0.00444444	0.00444444	0.00444444	0.00444444	0.00444444	0.00444444	0.0177778	0.00444444	0.00444444
0.00444444	0.00444444	0.00444444	0.00444444	0.0711111	0	0.04	0	0.0177778	0.00444444	0.0711111	0.00444444	0.04	0.00444444	0	0	0	0	0.04	0.00444444	0.00444444	0.0177778	0.00444444	0.00444444	0	0.00444444	0.00444444	0	0.00444444	0.00444444	0.04	0.00444444	0.0711111	0.00444444	0.00444444	0	0.00444444	0.00444444	0.00444444	0	0.00444444	0.00444444	0.04	0.00444444	0.00444444	0.00444444	0.00444444	0	0.04	0.04
0.0177778	0.0177778	0.0177778	0.0711111	0.00444444	0.04	0	0.04	0.00444444	0.0177778	0.00444444	0.0177778	0	0.0177778	0.04	0.04	0.04	0.04	0	0.0177778	0.0177778	0.111111	0.0177778	0.0177778	0.04	0.0711111	0.0177778	0.04	0.0177778	0.0711111	0	0.0177778	0.00444444	0.0177778	0.0177778	0.04	0.0177778	0.0177778	0.0177778	0.04	0.0177778	0.0177778	0	0.0177778	0.0177778	0.0177778	0.0177778	0.04	0	0
0	0	0	0.0177778	0.04	0.00444444	0.0177778	0.00444444	0.00444444	0	0.04	0	0.0177778	0	0.00444444	0.00444444	0.00444444	0.00444444	0.0177778	0	0	0.04	0	0	0.00444444	0.0177778	0	0.00444444	0	0.0177778	0.0177778	0	0.04	0	0	0.00444444	0	0	0	0.00444444	0	0	0.0177778	0	0	0	0	0.00444444	0.0177778	0.0177778
0.0177778	0.0177778	0.0177778	0.0711111	0.00444444	0.04	0	0.04	0.00444444	0.0177778	0.00444444	0.0177778	0	0.0177778	0.04	0.04	0.04	0.04	0	0.0177778	0.0177778	0.111111	0.0177778	0.0177778	0.04	0.0711111	0.0177778	0.04	0.0177778	0.0711111	0	0.0177778	0.00444444	0.0177778	0.0177778	0.04	0.0177778	0.0177778	0.0177778	0.04	0.0177778	0.0177778	0	0.0177778	0.0177778	0.0177778	0.0177778	0.04	0	0
0	0	0	0.0177778	0.04	0.00444444	0.0177778	0.00444444	0.00444444	0	0.04	0	0.0177778	0	0.00444444	0.00444444	0.00444444	0.00444444	0.0177778	0	0	0.04	0	0	0.00444444	0.0177778	0	0.00444444	0	0.0177778	0.0177778	0	0.04	0	0	0.00444444	0	0	0	0.00444444	0	0	0.0177778	0	0	0	0	0.00444444	0.0177778	0.0177778
0.00444444	0.00444444	0.00444444	0.00444444	0.0711111	0	0.04	0	0.0177778	0.00444444	0.0711111	0.00444444	0.04	0.00444444	0	0	0	0	0.04	0.00444444	0.00444444	0.0177778	0.00444444	0.00444444	0	0.00444444	0.00444444	0	0.00444444	0.00444444	0.04	0.00444444	0.0711111	0.00444444	0.00444444	0	0.00444444	0.00444444	0.00444444	0	0.00444444	0.00444444	0.04	0.00444444	0.00444444	0.00444444	0.00444444	0	0.04	0.04
0.04	0.04	0.04	0.00444444	0.16	0.0177778	0.111111	0.0177778	0.0711111	0.04	0.16	0.04	0.111111	0.04	0.0177778	0.0177778	0.0177778	0.0177778	0.111111	0.04	0.04	0	0.04	0.04	0.0177778	0.00444444	0.04	0.0177778	0.04	0.00444444	0.111111	0.04	0.16	0.04	0.04	0.0177778	0.04	0.04	0.04	0.0177778	0.04	0.04	0.111111	0.04	0.04	0.04	0.04	0.0177778	0.111111	0.111111
0.00444444	0.00444444	0.00444444	0.00444444	0.0711111	0	0.04	0	0.0177778	0.00444444	0.0711111	0.00444444	0.04	0.00444444	0	0	0	0	0.04	0.00444444	0.00444444	0.0177778	0.00444444	0.00444444	0	0.00444444	0.00444444	0	0.00444444	0.00444444	0.04	0.00444444	0.0711111	0.00444444	0.00444444	0	0.00444444	0.00444444	0.00444444	0	0.00444444	0.00444444	0.04	0.00444444	0.00444444	0.00444444	0.00444444	0	0.04	0.04
0.04	0.04	0.04	0.00444444	0.16	0.0177778	0.111111	0.0177778	0.0711111	0.04	0.16	0.04	0.111111	0.04	0.0177778	0.0177778	0.0177778	0.0177778	0.111111	0.04	0.04	0	0.04	0.04	0.0177778	0.00444444	0.04	0.0177778	0.04	0.00444444	0.111111	0.04	0.16	0.04	0.04	0.0177778	0.04	0.04	0.04	0.0177778	0.04	0.04	0.111111	0.04	0.04	0.04	0.04	0.0177778	0.111111	0.111111
0.00444444	0.00444444	0.00444444	0.00444444	0.0711111	0	0.04	0	0.0177778	0.00444444	0.0711111	0.00444444	0.04	0.00444444	0	0	0	0	0.04	0.00444444	0.00444444	0.0177778	0.00444444	0.00444444	0	0.00444444	0.00444444	0	0.00444444	0.00444444	0.04	0.00444444	0.0711111	0.00444444	0.00444444	0	0.00444444	0.00444444	0.00444444	0	0.00444444	0.00444444	0.04	0.00444444	0.00444444	0.00444444	0.00444444	0	0.04	0.04
0.00444444	0.00444444	0.00444444	0.00444444	0.0711111	0	0.04	0	0.0177778	0.00444444	0.0711111	0.00444444	0.04	0.00444444	0	0	0	0	0.04	0.00444444	0.00444444	0.0177778	0.00444444	0.00444444	0	0.00444444	0.00444444	0	0.00444444	0.00444444	0.04	0.00444444	0.0711111	0.00444444	0.00444444	0	0.00444444	0.00444444	0.00444444	0	0.00444444	0.00444444	0.04	0.00444444	0.00444444	0.00444444	0.00444444	0	0.04	0.04
0.00444444	0.00444444	0.00444444	0.00444444	0.0711111	0	0.04	0	0.0177778	0.00444444	0.0711111	0.00444444	0.04	0.00444444	0	0	0	0	0.04	0.00444444	0.00444444	0.0177778	0.00444444	0.00444444	0	0.00444444	0.00444444	0	0.00444444	0.00444444	0.04	0.00444444	0.0711111	0.00444444	0.00444444	0	0.00444444	0.00444444	0.00444444	0	0.00444444	0.00444444	0.04	0.00444444	0.00444444	0.00444444	0.00444444	0	0.04	0.04
0.04	0.04	0.04	0.00444444	0.16	0.0177778	0.111111	0.0177778	0.0711111	0.04	0.16	0.04	0.111111	0.04	0.0177778	0.0177778	0.0177778	0.0177778	0.111111	0.04	0.04	0	0.04	0.04	0.0177778	0.00444444	0.04	0.0177778	0.04	0.00444444	0.111111	0.04	0.16	0.04	0.04	0.0177778	0.04	0.04	0.04	0.0177778	0.04	0.04	0.111111	0.04	0.04	0.04	0.04	0.0177778	0.111111	0.111111
0.04	0.04	0.04	0.111111	0	0.0711111	0.00444444	0.0711111	0.0177778	0.04	0	0.04	0.00444444	0.04	0.0711111	0.0711111	0.0711111	0.0711111	0.00444444	0.04	0.04	0.16	0.04	0.04	0.0711111	0.111111	0.04	0.0711111	0.04	0.111111	0.00444444	0.04	0	0.04	0.04	0.0711111	0.04	0.04	0.04	0.0711111	0.04	0.04	0.00444444	0.04	0.04	0.04	0.04	0.0711111	0.00444444	0.00444444
0	0	0	0.0177778	0.04	0.00444444	0.0177778	0.00444444	0.00444444	0	0.04	0	0.0177778	0	0.00444444	0.00444444	0.00444444	0.00444444	0.0177778	0	0	0.04	0	0	0.00444444	0.0177778	0	0.00444444	0	0.0177778	0.0177778	0	0.04	0	0	0.00444444	0	0	0	0.00444444	0	0	0.0177778	0	0	0	0	0.00444444	0.0177778	0.0177778
0.04	0.04	0.04	0.111111	0	0.0711111	0.00444444	0.0711111	0.0177778	0.04	0	0.04	0.00444444	0.04	0.0711111	0.0711111	0.0711111	0.0711111	0.00444444	0.04	0.04	0.16	0.04	0.04	0.0711111	0.111111	0.04	0.0711111	0.04	0.111111	0.00444444	0.04	0	0.04	0.04	0.0711111	0.04	0.04	0.04	0.0711111	0.04	0.04	0.00444444	0.04	0.04	0.04	0.04	0.0711111	0.00444444	0.00444444
0	0	0	0.0177778	0.04	0.00444444	0.0177778	0.00444444	0.00444444	0	0.04	0	0.0177778	0	0.00444444	0.00444444	0.00444444	0.00444444	0.0177778	0	0	0.04	0	0	0.00444444	0.0177778	0	0.00444444	0	0.0177778	0.0177778	0	0.04	0	0	0.00444444	0	0	0	0.00444444	0	0	0.0177778	0	0	0	0	0.00444444	0.0177778	0.0177778
0.00444444	0.00444444	0.00444444	0.00444444	0.0711111	0	0.04	0	0.0177778	0.00444444	0.0711111	0.00444444	0.04	0.00444444	0	0	0	0	0.04	0.00444444	0.00444444	0.0177778	0.00444444	0.00444444	0	0.00444444	0.00444444	0	0.00444444	0.00444444	0.04	0.00444444	0.0711111	0.00444444	0.00444444	0	0.00444444	0.00444444	0.00444444	0	0.00444444	0.00444444	0.04	0.00444444	0.00444444	0.00444444	0.00444444	0	0.04	0.04
0.04	0.04	0.04	0.00444444	0.16	0.0177778	0.111111	0.0177778	0.0711111	0.04	0.16	0.04	0.111111	0.04	0.0177778	0.0177778	0.0177778	0.0177778	0.111111	0.04	0.04	0	0.04	0.04	0.0177778	0.00444444	0.04	0.0177778	0.04	0.00444444	0.111111	0.04	0.16	0.04	0.04	0.0177778	0.04	0.04	0.04	0.0177778	0.04	0.04	0.111111	0.04	0.04	0.04	0.04	0.0177778	0.111111	0.111111
0	0	0	0.0177778	0.04	0.00444444	0.0177778	0.00444444	0.00444444	0	0.04	0	0.0177778	0	0.00444444	0.00444444	0.00444444	0.00444444	0.0177778	0	0	0.04	0	0	0.00444444	0.0177778	0	0.00444444	0	0.0177778	0.0177778	0	0.04	0	0	0.00444444	0	0	0	0.00444444	0	0	0.0177778	0	0	0	0	0.00444444	0.0177778	0.0177778
0.0177778	0.0177778	0.0177778	0	0.111111	0.00444444	0.0711111	0.00444444	0.04	0.0177778	0.111111	0.0177778	0.0711111	0.0177778	0.00444444	0.00444444	0.00444444	0.00444444	0.0711111	0.0177778	0.0177778	0.00444444	0.0177778	0.0177778	0.00444444	0	0.0177778	0.00444444	0.0177778	0	0.0711111	0.0177778	0.111111	0.0177778	0.0177778	0.00444444	0.0177778	0.0177778	0.0177778	0.00444444	0.0177778	0.0177778	0.0711111	0.0177778	0.0177778	0.0177778	0.0177778	0.00444444	0.0711111	0.0711111
0	0	0	0.0177778	0.04	0.00444444	0.0177778	0.00444444	0.00444444	0	0.04	0	0.0177778	0	0.00444444	0.00444444	0.00444444	0.00444444	0.0177778	0	0	0.04	0	0	0.00444444	0.0177778	0	0.00444444	0	0.0177778	0.0177778	0	0.04	0	0	0.00444444	0	0	0	0.00444444	0	0	0.0177778	0	0	0	0	0.00444444	0.0177778	0.0177778
0.00444444	0.00444444	0.00444444	0.00444444	0.0711111	0	0.04	0	0.0177778	0.00444444	0.0711111	0.00444444	0.04	0.00444444	0	0	0	0	0.04	0.00444444	0.00444444	0.0177778	0.00444444	0.00444444	0	0.00444444	0.00444444	0	0.00444444	0.00444444	0.04	0.00444444	0.0711111	0.00444444	0.00444444	0	0.00444444	0.00444444	0.00444444	0	0.00444444	0.00444444	0.04	0.00444444	0.00444444	0.00444444	0.00444444	0	0.04	0.04
0.0177778	0.0177778	0.0177778	0	0.111111	0.00444444	0.0711111	0.00444444	0.04	0.0177778	0.111111	0.0177778	0.0711111	0.0177778	0.00444444	0.00444444	0.00444444	0.00444444	0.0711111	0.0177778	0.0177778	0.00444444	0.0177778	0.0177778	0.00444444	0	0.0177778	0.00444444	0.0177778	0	0.0711111	0.0177778	0.111111	0.0177778	0.0177778	0.00444444	0.0177778	0.0177778	0.0177778	0.00444444	0.0177778	0.0177778	0.0711111	0.0177778	0.0177778	0.0177778	0.0177778	0.00444444	0.0711111	0.0711111
0.0177778	0.0177778	0.0177778	0	0.111111	0.00444444	0.0711111	0.00444444	0.04	0.0177778	0.111111	0.0177778	0.0711111	0.0177778	0.00444444	0.00444444	0.00444444	0.00444444	0.0711111	0.0177778	0.0177778	0.00444444	0.0177778	0.0177778	0.00444444	0	0.0177778	0.00444444	0.0177778	0	0.0711111	0.0177778	0.111111	0.0177778	0.0177778	0.00444444	0.0177778	0.0177778	0.0177778	0.00444444	0.0177778	0.0177778	0.0711111	0.0177778	0.0177778	0.0177778	0.0177778	0.00444444	0.0711111	0.0711111
0	0	0	0.0177778	0.04	0.00444444	0.0177778	0.00444444	0.00444444	0	0.04	0	0.0177778	0	0.00444444	0.00444444	0.00444444	0.00444444	0.0177778	0	0	0.04	0	0	0.00444444	0.0177778	0	0.00444444	0	0.0177778	0.0177778	0	0.04	0	0	0.00444444	0	0	0	0.00444444	0	0	0.0177778	0	0	0	0	0.00444444	0.0177778	0.0177778
0	0	0	0.0177778	0.04	0.00444444	0.0177778	0.00444444	0.00444444	0	0.04	0	0.0177778	0	0.00444444	0.00444444	0.00444444	0.00444444	0.0177778	0	0	0.04	0	0	0.00444444	0.0177778	0	0.00444444	0	0.0177778	0.0177778	0	0.04	0	0	0.00444444	0	0	0	0.00444444	0	0	0.0177778	0	0	0	0	0.00444444	0.0177778	0.0177778
0.0177778	0.0177778	0.0177778	0	0.111111	0.00444444	0.0711111	0.00444444	0.04	0.0177778	0.111111	0.0177778	0.0711111	0.0177778	0.00444444	0.00444444	0.00444444	0.00444444	0.0711111	0.0177778	0.0177778	0.00444444	0.0177778	0.0177778	0.00444444	0	0.0177778	0.00444444	0.0177778	0	0.0711111	0.0177778	0.111111	0.0177778	0.0177778	0.00444444	0.0177778	0.0177778	0.0177778	0.00444444	0.0177778	0.0177778	0.0711111	0.0177778	0.0177778	0.0177778	0.0177778	0.00444444	0.0711111	0.0711111
0.04	0.04	0.04	0.00444444	0.16	0.0177778	0.111111	0.0177778	0.0711111	0.04	0.16	0.04	0.111111	0.04	0.0177778	0.0177778	0.0177778	0.0177778	0.111111	0.04	0.04	0	0.04	0.04	0.0177778	0.00444444	0.04	0.0177778	0.04	0.00444444	0.111111	0.04	0.16	0.04	0.04	0.0177778	0.04	0.04	0.04	0.0177778	0.04	0.04	0.111111	0.04	0.04	0.04	0.04	0.0177778	0.111111	0.111111
0.0177778	0.0177778	0.0177778	0.0711111	0.00444444	0.04	0	0.04	0.00444444	0.0177778	0.00444444	0.0177778	0	0.0177778	0.04	0.04	0.04	0.04	0	0.0177778	0.0177778	0.111111	0.0177778	0.0177778	0.04	0.0711111	0.0177778	0.04	0.0177778	0.0711111	0	0.0177778	0.00444444	0.0177778	0.0177778	0.04	0.0177778	0.0177778	0.0177778	0.04	0.0177778	0.0177778	0	0.0177778	0.0177778	0.0177778	0.0177778	0.04	0	0
0	0	0	0.0177778	0.04	0.00444444	0.0177778	0.00444444	0.00444444	0	0.04	0	0.0177778	0	0.00444444	0.00444444	0.00444444	0.00444444	0.0177778	0	0	0.04	0	0	0.00444444	0.0177778	0	0.00444444	0	0.0177778	0.0177778	0	0.04	0	0	0.00444444	0	0	0	0.00444444	0	0	0.0177778	0	0	0	0	0.00444444	0.0177778	0.0177778
0.04	0.04	0.04	0.111111	0	0.0711111	0.00444444	0.0711111	0.0177778	0.04	0	0.04	0.00444444	0.04	0.0711111	0.0711111	0.0711111	0.0711111	0.00444444	0.04	0.04	0.16	0.04	0.04	0.0711111	0.111111	0.04	0.0711111	0.04	0.111111	0.00444444	0.04	0	0.04	0.04	0.0711111	0.04	0.04	0.04	0.0711111	0.04	0.04	0.00444444	0.04	0.04	0.04	0.04	0.0711111	0.00444444	0.00444444
0.0177778	0.0177778	0.0177778	0.0711111	0.00444444	0.04	0	0.04	0.00444444	0.0177778	0.00444444	0.0177778	0	0.0177778	0.04	0.04	0.04	0.04	0	0.0177778	0.0177778	0.111111	0.0177778	0.0177778	0.04	0.0711111	0.0177778	0.04	0.0177778	0.0711111	0	0.0177778	0.00444444	0.0177778	0.0177778	0.04	0.0177778	0.0177778	0.0177778	0.04	0.0177778	0.0177778	0	0.0177778	0.0177778	0.0177778	0.0177778	0.04	0	0
0	0	0	0.0177778	0.04	0.00444444	0.0177778	0.00444444	0.00444444	0	0.04	0	0.0177778	0	0.00444444	0.00444444	0.00444444	0.00444444	0.0177778	0	0	0.04	0	0	0.00444444	0.0177778	0	0.00444444	0	0.0177778	0.0177778	0	0.04	0	0	0.00444444	0	0	0	0.00444444	0	0	0.0177778	0	0	0	0	0.00444444	0.0177778	0.0177778
0.00444444	0.00444444	0.00444444	0.00444444	0.0711111	0	0.04	0	0.0177778	0.00444444	0.0711111	0.00444444	0.04	0.00444444	0	0	0	0	0.04	0.00444444	0.00444444	0.0177778	0.00444444	0.00444444	0	0.00444444	0.00444444	0	0.00444444	0.00444444	0.04	0.00444444	0.0711111	0.00444444	0.00444444	0	0.00444444	0.00444444	0.00444444	0	0.00444444	0.00444444	0.04	0.00444444	0.00444444	0.00444444	0.00444444	0	0.04	0.04
0.0177778	0.0177778	0.0177778	0.0711111	0.00444444	0.04	0	0.04	0.00444444	0.0177778	0.00444444	0.0177778	0	0.0177778	0.04	0.04	0.04	0.04	0	0.0177778	0.0177778	0.111111	0.0177778	0.0177778	0.04	0.0711111	0.0177778	0.04	0.0177778	0.0711111	0	0.0177778	0.00444444	0.0177778	0.0177778	0.04	0.0177778	0.0177778	0.0177778	0.04	0.0177778	0.0177778	0	0.0177778	0.0177778	0.0177778	0.0177778	0.04	0	0
0.0177778	0.0177778	0.0177778	0.0711111	0.00444444	0.04	0	0.04	0.00444444	0.0177778	0.00444444	0.0177778	0	0.0177778	0.04	0.04	0.04	0.04	0	0.0177778	0.0177778	0.111111	0.0177778	0.0177778	0.04	0.0711111	0.0177778	0.04	0.0177778	0.0711111	0	0.0177778	0.00444444	0.0177778	0.0177778	0.04	0.0177778	0.0177778	0.0177778	0.04	0.0177778	0.0177778	0	0.0177778	0.0177778	0.0177778	0.0177778	0.04	0	0
0.0177778	0.0177778	0.0177778	0.0711111	0.00444444	0.04	0	0.04	0.00444444	0.0177778	0.00444444	0.0177778	0	0.0177778	0.04	0.04	0.04	0.04	0	0.0177778	0.0177778	0.111111	0.0177778	0.0177778	0.04	0.0711111	0.0177778	0.04	0.0177778	0.0711111	0	0.0177778	0.00444444	0.0177778	0.0177778	0.04	0.0177778	0.0177778	0.0177778	0.04	0.0177778	0.0177778	0	0.0177778	0.0177778	0.0177778	0.0177778	0.04	0	0
0.00444444	0.00444444	0.00444444	0.00444444	0.0711111	0	0.04	0	0.0177778	0.00444444	0.0711111	0.00444444	0.04	0.00444444	0	0	0	0	0.04	0.00444444	0.00444444	0.0177778	0.00444444	0.00444444	0	0.00444444	0.00444444	0	0.00444444	0.00444444	0.04	0.00444444	0.0711111	0.00444444	0.00444444	0	0.00444444	0.00444444	0.00444444	0	0.00444444	0.00444444	0.04	0.00444444	0.00444444	0.00444444	0.00444444	0	0.04	0.04
0.0177778	0.0177778	0.0177778	0.0711111	0.00444444	0.04	0	0.04	0.00444444	0.0177778	0.00444444	0.0177778	0	0.0177778	0.04	0.04	0.04	0.04	0	0.0177778	0.0177778	0.111111	0.0177778	0.0177778	0.04	0.0711111	0.0177778	0.04	0.0177778	0.0711111	0	0.0177778	0.00444444	0.0177778	0.0177778	0.04	0.0177778	0.0177778	0.0177778	0.04	0.0177778	0.0177778	0	0.0177778	0.0177778	0.0177778	0.0177778	0.04	0	0
0.00444444	0.00444444	0.00444444	0.00444444	0.0711111	0	0.04	0	0.0177778	0.00444444	0.0711111	0.00444444	0.04	0.00444444	0	0	0	0	0.04	0.00444444	0.00444444	0.0177778	0.00444444	0.00444444	0	0.00444444	0.00444444	0	0.00444444	0.00444444	0.04	0.00444444	0.0711111	0.00444444	0.00444444	0	0.00444444	0.00444444	0.00444444	0	0.00444444	0.00444444	0.04	0.00444444	0.00444444	0.00444444	0.00444444	0	0.04	0.04
0.0177778	0.0177778	0.0177778	0.0711111	0.00444444	0.04	0	0.04	0.00444444	0.0177778	0.00444444	0.0177778	0	0.0177778	0.04	0.04	0.04	0.04	0	0.0177778	0.0177778	0.111111	0.0177778	0.0177778	0.04	0.0711111	0.0177778	0.04	0.0177778	0.0711111	0	0.0177778	0.00444444	0.0177778	0.0177778	0.04	0.0177778	0.0177778	0.0177778	0.04	0.0177778	0.0177778	0	0.0177778	0.0177778	0.0177778	0.0177778	0.04	0	0
0	0	0	0.0177778	0.04	0.00444444	0.0177778	0.00444444	0.00444444	0	0.04	0	0.0177778	0	0.00444444	0.00444444	0.00444444	0.00444444	0.0177778	0	0	0.04	0	0	0.00444444	0.0177778	0	0.00444444	0	0.0177778	0.0177778	0	0.04	0	0	0.00444444	0	0	0	0.00444444	0	0	0.0177778	0	0	0	0	0.00444444	0.0177778	0.0177778
0	0	0	0.0177778	0.04	0.00444444	0.0177778	0.00444444	0.00444444	0	0.04	0	0.0177778	0	0.00444444	0.00444444	0.00444444	0.00444444	0.0177778	0	0	0.04	0	0	0.00444444	0.0177778	0	0.00444444	0	0.0177778	0.0177778	0	0.04	0	0	0.00444444	0	0	0	0.00444444	0	0	0.0177778	0	0	0	0	0.00444444	0.0177778	0.0177778
0.00444444	0.00444444	0.00444444	0.00444444	0.0711111	0	0.04	0	0.0177778	0.00444444	0.0711111	0.00444444	0.04	0.00444444	0	0	0	0	0.04	0.00444444	0.00444444	0.0177778	0.00444444	0.00444444	0	0.00444444	0.00444444	0	0.00444444	0.00444444	0.04	0.00444444	0.0711111	0.00444444	0.00444444	0	0.00444444	0.00444444	0.00444444	0	0.00444444	0.00444444	0.04	0.00444444	0.00444444	0.00444444	0.00444444	0	0.04	0.04
0.0177778	0.0177778	0.0177778	0.0711111	0.00444444	0.04	0	0.04	0.00444444	0.0177778	0.00444444	0.0177778	0	0.0177778	0.04	0.04	0.04	0.04	0	0.0177778	0.0177778	0.111111	0.0177778	0.0177778	0.04	0.0711111	0.0177778	0.04	0.0177778	0.0711111	0	0.0177778	0.00444444	0.0177778	0.0177778	0.04	0.0177778	0.0177778	0.0177778	0.04	0.0177778	0.0177778	0	0.0177778	0.0177778	0.0177778	0.0177778	0.04	0	0
0	0	0	0.0177778	0.04	0.00444444	0.0177778	0.00444444	0.00444444	0	0.04	0	0.0177778	0	0.00444444	0.00444444	0.00444444	0.00444444	0.0177778	0	0	0.04	0	0	0.00444444	0.0177778	0	0.00444444	0	0.0177778	0.0177778	0	0.04	0	0	0.00444444	0	0	0	0.00444444	0	0	0.0177778	0	0	0	0	0.00444444	0.0177778	0.0177778
0	0	0	0.0177778	0.04	0.00444444	0.0177778	0.00444444	0.00444444	0	0.04	0	0.0177778	0	0.00444444	0.00444444	0.00444444	0.00444444	0.0177778	0	0	0.04	0	0	0.00444444	0.0177778	0	0.00444444	0	0.0177778	0.0177778	0	0.04	0	0	0.00444444	0	0	0	0.00444444	0	0	0.0177778	0	0	0	0	0.00444444	0.0177778	0.0177778
0.00444444	0.00444444	0.00444444	0.00444444	0.0711111	0	0.04	0	0.0177778	0.00444444	0.0711111	0.00444444	0.04	0.00444444	0	0	0	0	0.04	0.00444444	0.00444444	0.0177778	0.00444444	0.00444444	0	0.00444444	0.00444444	0	0.00444444	0.00444444	0.04	0.00444444	0.0711111	0.00444444	0.00444444	0	0.00444444	0.00444444	0.00444444	0	0.00444444	0.00444444	0.04	0.00444444	0.00444444	0.00444444	0.00444444	0	0.04	0.04
0.00444444	0.00444444	0.00444444	0.00444444	0.0711111	0	0.04	0	0.0177778	0.00444444	0.0711111	0.00444444	0.04	0.00444444	0	0	0	0	0.04	0.00444444	0.00444444	0.0177778	0.00444444	0.00444444	0	0.00444444	0.00444444	0	0.00444444	0.00444444	0.04	0.00444444	0.0711111	0.00444444	0.00444444	0	0.00444444	0.00444444	0.00444444	0	0.00444444	0.00444444	0.04	0.00444444	0.00444444	0.00444444	0.00444444	0	0.04	0.04
0.0177778	0.0177778	0.0177778	0	0.111111	0.00444444	0.0711111	0.00444444	0.04	0.0177778	0.111111	0.0177778	0.0711111	0.0177778	0.00444444	0.00444444	0.00444444	0.00444444	0.0711111	0.0177778	0.0177778	0.00444444	0.0177778	0.0177778	0.00444444	0	0.0177778	0.00444444	0.0177778	0	0.0711111	0.0177778	0.111111	0.0177778	0.0177778	0.00444444	0.0177778	0.0177778	0.0177778	0.00444444	0.0177778	0.0177778	0.0711111	0.0177778	0.0177778	0.0177778	0.0177778	0.00444444	0.0711111	0.0711111
0	0	0	0.0177778	0.04	0.00444444	0.0177778	0.00444444	0.00444444	0	0.04	0	0.0177778	0	0.00444444	0.00444444	0.00444444	0.00444444	0.0177778	0	0	0.04	0	0	0.00444444	0.0177778	0	0.00444444	0	0.0177778	0.0177778	0	0.04	0	0	0.00444444	0	0	0	0.00444444	0	0	0.0177778	0	0	0	0	0.00444444	0.0177778	0.0177778
0	0	0	0.0177778	0.04	0.00444444	0.0177778	0.00444444	0.00444444	0	0.04	0	0.0177778	0	0.00444444	0.00444444	0.00444444	0.00444444	0.0177778	0	0	0.04	0	0	0.00444444	0.0177778	0	0.00444444	0	0.0177778	0.0177778	0	0.04	0	0	0.00444444	0	0	0	0.00444444	0	0	0.0177778	0	0	0	0	0.00444444	0.0177778	0.0177778
0	0	0	0.0177778	0.04	0.00444444	0.0177778	0.00444444	0.00444444	0	0.04	0	0.0177778	0	0.00444444	0.00444444	0.00444444	0.00444444	0.0177778	0	0	0.04	0	0	0.00444444	0.0177778	0	0.00444444	0	0.0177778	0.0177778	0	0.04	0	0	0.00444444	0	0	0	0.00444444	0	0	0.0177778	0	0	0	0	0.00444444	0.0177778	0.0177778
0.0177778	0.0177778	0.0177778	0	0.111111	0.00444444	0.0711111	0.00444444	0.04	0.0177778	0.111111	0.0177778	0.0711111	0.0177778	0.00444444	0.00444444	0.00444444	0.00444444	0.0711111	0.0177778	0.0177778	0.00444444	0.0177778	0.0177778	0.00444444	0	0.0177778	0.00444444	0.0177778	0	0.0711111	0.0177778	0.111111	0.0177778	0.0177778	0.00444444	0.0177778	0.0177778	0.0177778	0.00444444	0.0177778	0.0177778	0.0711111	0.0177778	0.0177778	0.0177778	0.0177778	0.00444444	0.0711111	0.0711111
0.04	0.04	0.04	0.111111	0	0.0711111	0.00444444	0.0711111	0.0177778	0.04	0	0.04	0.00444444	0.04	0.0711111	0.0711111	0.0711111	0.0711111	0.00444444	0.04	0.04	0.16	0.04	0.04	0.0711111	0.111111	0.04	0.0711111	0.04	0.111111	0.00444444	0.04	0	0.04	0.04	0.0711111	0.04	0.04	0.04	0.0711111	0.04	0.04	0.00444444	0.04	0.04	0.04	0.04	0.0711111	0.00444444	0.00444444
0.0177778	0.0177778	0.0177778	0.0711111	0.00444444	0.04	0	0.04	0.00444444	0.0177778	0.00444444	0.0177778	0	0.0177778	0.04	0.04	0.04	0.04	0	0.0177778	0.0177778	0.111111	0.0177778	0.0177778	0.04	0.0711111	0.0177778	0.04	0.0177778	0.0711111	0	0.0177778	0.00444444	0.0177778	0.0177778	0.04	0.0177778	0.0177778	0.0177778	0.04	0.0177778	0.0177778	0	0.0177778	0.0177778	0.0177778	0.0177778	0.04	0	0
0	0	0	0.0177778	0.04	0.00444444	0.0177778	0.00444444	0.00444444	0	0.04	0	0.0177778	0	0.00444444	0.00444444	0.00444444	0.00444444	0.0177778	0	0	0.04	0	0	0.00444444	0.0177778	0	0.00444444	0	0.0177778	0.0177778	0	0.04	0	0	0.00444444	0	0	0	0.00444444	0	0	0.0177778	0	0	0	0	0.00444444	0.0177778	0.0177778
0	0	0	0.0177778	0.04	0.00444444	0.0177778	0.00444444	0.00444444	0	0.04	0	0.0177778	0	0.00444444	0.00444444	0.00444444	0.00444444	0.0177778	0	0	0.04	0	0	0.00444444	0.0177778	0	0.00444444	0	0.0177778	0.0177778	0	0.04	0	0	0.00444444	0	0	0	0.00444444	0	0	0.0177778	0	0	0	0	0.00444444	0.0177778	0.0177778
0.00444444	0.00444444	0.00444444	0.00444444	0.0711111	0	0.04	0	0.0177778	0.00444444	0.0711111	0.00444444	0.04	0.00444444	0	0	0	0	0.04	0.00444444	0.00444444	0.0177778	0.00444444	0.00444444	0	0.00444444	0.00444444	0	0.00444444	0.00444444	0.04	0.00444444	0.0711111	0.00444444	0.00444444	0	0.00444444	0.00444444	0.00444444	0	0.00444444	0.00444444	0.04	0.00444444	0.00444444	0.00444444	0.00444444	0	0.04	0.04
0.04	0.04	0.04	0.00444444	0.16	0.0177778	0.111111	0.0177778	0.0711111	0.04	0.16	0.04	0.111111	0.04	0.0177778	0.0177778	0.0177778	0.0177778	0.111111	0.04	0.04	0	0.04	0.04	0.0177778	0.00444444	0.04	0.0177778	0.04	0.00444444	0.111111	0.04	0.16	0.04	0.04	0.0177778	0.04	0.04	0.04	0.0177778	0.04	0.04	0.111111	0.04	0.04	0.04	0.04	0.0177778	0.111111	0.111111
0	0	0	0.0177778	0.04	0.00444444	0.0177778	0.00444444	0.00444444	0	0.04	0	0.0177778	0	0.00444444	0.00444444	0.00444444	0.00444444	0.0177778	0	0	0.04	0	0	0.00444444	0.0177778	0	0.00444444	0	0.0177778	0.0177778	0	0.04	0	0	0.00444444	0	0	0	0.00444444	0	0	0.0177778	0	0	0	0	0.00444444	0.0177778	0.0177778
0.04	0.04	0.04	0.00444444	0.16	0.0177778	0.111111	0.0177778	0.0711111	0.04	0.16	0.04	0.111111	0.04	0.0177778	0.0177778	0.0177778	0.0177778	0.111111	0.04	0.04	0	0.04	0.04	0.0177778	0.00444444	0.04	0.0177778	0.04	0.00444444	0.111111	0.04	0.16	0.04	0.04	0.0177778	0.04	0.04	0.04	0.0177778	0.04	0.04	0.111111	0.04	0.04	0.04	0.04	0.0177778	0.111111	0.111111
0	0	0	0.0177778	0.04	0.00444444	0.0177778	0.00444444	0.00444444	0	0.04	0	0.0177778	0	0.00444444	0.00444444	0.00444444	0.00444444	0.0177778	0	0	0.04	0	0	0.00444444	0.0177778	0	0.00444444	0	0.0177778	0.0177778	0	0.04	0	0	0.00444444	0	0	0	0.00444444	0	0	0.0177778	0	0	0	0	0.00444444	0.0177778	0.0177778
0	0	0	0.0177778	0.04	0.00444444	0.0177778	0.00444444	0.00444444	0	0.04	0	0.0177778	0	0.00444444	0.00444444	0.00444444	0.00444444	0.0177778	0	0	0.04	0	0	0.00444444	0.0177778	0	0.00444444	0	0.0177778	0.0177778	0	0.04	0	0	0.00444444	0	0	0	0.00444444	0	0	0.0177778	0	0	0	0	0.00444444	0.0177778	0.0177778
0	0	0	0.0177778	0.04	0.00444444	0.0177778	0.00444444	0.00444444	0	0.04	0	0.0177778	0	0.00444444	0.00444444	0.00444444	0.00444444	0.0177778	0	0	0.04	0	0	0.00444444	0.0177778	0	0.00444444	0	0.0177778	0.0177778	0	0.04	0	0	0.00444444	0	0	0	0.00444444	0	0	0.0177778	0	0	0	0	0.00444444	0.0177778	0.0177778
0	0	0	0.0177778	0.04	0.00444444	0.0177778	0.00444444	0.00444444	0	0.04	0	0.0177778	0	0.00444444	0.00444444	0.00444444	0.00444444	0.0177778	0	0	0.04	0	0	0.00444444	0.0177778	0	0.00444444	0	0.0177778	0.0177778	0	0.04	0	0	0.00444444	0	0	0	0.00444444	0	0	0.0177778	0	0	0	0	0.00444444	0.0177778	0.0177778
0	0	0	0.0177778	0.04	0.00444444	0.0177778	0.00444444	0.00444444	0	0.04	0	0.0177778	0	0.00444444	0.00444444	0.00444444	0.00444444	0.0177778	0	0	0.04	0	0	0.00444444	0.0177778	0	0.00444444	0	0.0177778	0.0177778	0	0.04	0	0	0.00444444	0	0	0	0.00444444	0	0	0.0177778	0	0	0	0	0.00444444	0.0177778	0.0177778
0	0	0	0.0177778	0.04	0.00444444	0.0177778	0.00444444	0.00444444	0	0.04	0	0.0177778	0	0.00444444	0.00444444	0.00444444	0.00444444	0.0177778	0	0	0.04	0	0	0.00444444	0.0177778	0	0.00444444	0	0.0177778	0.0177778	0	0.04	0	0	0.00444444	0	0	0	0.00444444	0	0	0.0177778	0	0	0	0	0.00444444	0.0177778	0.0177778
0.0177778	0.0177778	0.0177778	0.0711111	0.00444444	0.04	0	0.04	0.00444444	0.0177778	0.00444444	0.0177778	0	0.0177778	0.04	0.04	0.04	0.04	0	0.0177778	0.0177778	0.111111	0.0177778	0.0177778	0.04	0.0711111	0.0177778	0.04	0.0177778	0.0711111	0	0.0177778	0.00444444	0.0177778	0.0177778	0.04	0.0177778	0.0177778	0.0177778	0.04	0.0177778	0.0177778	0	0.0177778	0.0177778	0.0177778	0.0177778	0.04	0	0
0.00444444	0.00444444	0.00444444	0.00444444	0.0711111	0	0.04	0	0.0177778	0.00444444	0.0711111	0.00444444	0.04	0.00444444	0	0	0	0	0.04	0.00444444	0.00444444	0.0177778	0.00444444	0.00444444	0	0.00444444	0.00444444	0	0.00444444	0.00444444	0.04	0.00444444	0.0711111	0.00444444	0.00444444	0	0.00444444	0.00444444	0.00444444	0	0.00444444	0.00444444	0.04	0.00444444	0.00444444	0.00444444	0.00444444	0	0.04	0.04
0.00444444	0.00444444	0.00444444	0.00444444	0.0711111	0	0.04	0	0.0177778	0.00444444	0.0711111	0.00444444	0.04	0.00444444	0	0	0	0	0.04	0.00444444	0.00444444	0.0177778	0.00444444	0.00444444	0	0.00444444	0.00444444	0	0.00444444	0.00444444	0.04	0.00444444	0.0711111	0.00444444	0.00444444	0	0.00444444	0.00444444	0.00444444	0	0.00444444	0.00444444	0.04	0.00444444	0.00444444	0.00444444	0.00444444	0	0.04	0.04
0.111111	0.111111	0.111111	0.04	0.284444	0.0711111	0.217778	0.0711111	0.16	0.111111	0.284444	0.111111	0.217778	0.111111	0.0711111	0.0711111	0.0711111	0.0711111	0.217778	0.111111	0.111111	0.0177778	0.111111	0.111111	0.0711111	0.04	0.111111	0.0711111	0.111111	0.04	0.217778	0.111111	0.284444	0.111111	0.111111	0.0711111	0.111111	0.111111	0.111111	0.0711111	0.111111	0.111111	0.217778	0.111111	0.111111	0.111111	0.111111	0.0711111	0.217778	0.217778
0	0	0	0.0177778	0.04	0.00444444	0.0177778	0.00444444	0.00444444	0	0.04	0	0.0177778	0	0.00444444	0.00444444	0.00444444	0.00444444	0.0177778	0	0	0.04	0	0	0.00444444	0.0177778	0	0.00444444	0	0.0177778	0.0177778	0	0.04	0	0	0.00444444	0	0	0	0.00444444	0	0	0.0177778	0	0	0	0	0.00444444	0.0177778	0.0177778
0	0	0	0.0177778	0.04	0.00444444	0.0177778	0.00444444	0.00444444	0	0.04	0	0.0177778	0	0.00444444	0.00444444	0.00444444	0.00444444	0.0177778	0	0	0.04	0	0	0.00444444	0.0177778	0	0.00444444	0	0.0177778	0.0177778	0	0.04	0	0	0.00444444	0	0	0	0.00444444	0	0	0.0177778	0	0	0	0	0.00444444	0.0177778	0.0177778
0	0	0	0.0177778	0.04	0.00444444	0.0177778	0.00444444	0.00444444	0	0.04	0	0.0177778	0	0.00444444	0.00444444	0.00444444	0.00444444	0.0177778	0	0	0.04	0	0	0.00444444	0.0177778	0	0.00444444	0	0.0177778	0.0177778	0	0.04	0	0	0.00444444	0	0	0	0.00444444	0	0	0.0177778	0	0	0	0	0.00444444	0.0177778	0.0177778
0	0	0	0.0177778	0.04	0.00444444	0.0177778	0.00444444	0.00444444	0	0.04	0	0.0177778	0	0.00444444	0.00444444	0.00444444	0.00444444	0.0177778	0	0	0.04	0	0	0.00444444	0.0177778	0	0.00444444	0	0.0177778	0.0177778	0	0.04	0	0	0.00444444	0	0	0	0.00444444	0	0	0.0177778	0	0	0	0	0.00444444	0.0177778	0.0177778
0	0	0	0.0177778	0.04	0.00444444	0.0177778	0.00444444	0.00444444	0	0.04	0	0.0177778	0	0.00444444	0.00444444	0.00444444	0.00444444	0.0177778	0	0	0.04	0	0	0.00444444	0.0177778	0	0.00444444	0	0.0177778	0.0177778	0	0.04	0	0	0.00444444	0	0	0	0.00444444	0	0	0.0177778	0	0	0	0	0.00444444	0.0177778	0.0177778
[truncated: 369 more rows]
[truncated: 551 more columns]

## Sheet: DR Aa2e GDM
1	600	6	100	100	100	100	100	100	2	300	300
# Loci	2N-TOT	# Pops	GRP1	GRP2	GRP3	BLR4	CAM5	MUR6	# Regs	BNP	VCH
[truncated: 601 more rows]
[truncated: 551 more columns]

## Sheet: DR Aa2g GDM
1	600	6	100	100	100	100	100	100	2	300	300
# Loci	2N-Tot	# Pops	GRP1	GRP2	GRP3	BLR4	CAM5	MUR6	# Regs	BNP	VCH
[truncated: 601 more rows]
[truncated: 551 more columns]

## Sheet: DR Aa4d GDM
1	600	6	100	100	100	100	100	100	2	300	300
[truncated: 602 more rows]
[truncated: 551 more columns]

[truncated: 5 more sheets: DR Aa7f GDM, DR Aa7m GDM, DR Aa4k GDM, DR Aa2b GDM, Sheet1]
